# Supplementary material for: A Homochiral Multifunctional Metal-Organic Framework with Rod-Shaped Secondary Building Units
Source: Nanomaterials (Basel). 2017 Apr 21;7(4):88. doi: 10.3390/nano7040088 (PMC5408180; doi:10.3390/nano7040088)
Supplement: Supplementary file 1 [file nanomaterials-07-00088-s001.zip]

Archive with 4 entries (3 files):
- nanomaterials-189071-proof/
- nanomaterials-189071-proof/checkcif.pdf
- nanomaterials-189071-proof/I1.cif
- nanomaterials-189071-proof/Supporting information--proof.docx
