# Supplementary material for: A Homochiral Multifunctional Metal-Organic Framework with Rod-Shaped Secondary Building Units
Source: Nanomaterials (Basel). 2017 Apr 21;7(4):88. doi: 10.3390/nano7040088 (PMC5408180; doi:10.3390/nano7040088)
Supplement: Supplementary file 1 [file nanomaterials-07-00088-s001.zip › nanomaterials-189071-proof/I1.cif]

 
data_I1
 
_audit_creation_method            'SHELXL-2014/7'
_shelx_SHELXL_version_number      '2014/7'
_chemical_name_systematic         ?
_chemical_name_common             ?
_chemical_melting_point           ?
_chemical_formula_moiety          ?
_chemical_formula_sum
 'C34 H40 N2 O11 Zn2' 
_chemical_formula_weight          783.46

loop_
 _atom_type_symbol
 _atom_type_description
 _atom_type_scat_dispersion_real
 _atom_type_scat_dispersion_imag
 _atom_type_scat_source
 'C'  'C'   0.0033   0.0016
 'International Tables Vol C Tables 4.2.6.8 and 6.1.1.4'
 'H'  'H'   0.0000   0.0000
 'International Tables Vol C Tables 4.2.6.8 and 6.1.1.4'
 'N'  'N'   0.0061   0.0033
 'International Tables Vol C Tables 4.2.6.8 and 6.1.1.4'
 'O'  'O'   0.0106   0.0060
 'International Tables Vol C Tables 4.2.6.8 and 6.1.1.4'
 'Zn'  'Zn'   0.2839   1.4301
 'International Tables Vol C Tables 4.2.6.8 and 6.1.1.4'
 
_space_group_crystal_system       monoclinic
_space_group_IT_number            5
_space_group_name_H-M_alt         'C 2'
_space_group_name_Hall            'C 2y'
 
_shelx_space_group_comment
;
The symmetry employed for this shelxl refinement is uniquely defined
by the following loop, which should always be used as a source of
symmetry information in preference to the above space-group names.
They are only intended as comments.
;
 
loop_
 _space_group_symop_operation_xyz
 'x, y, z'
 '-x, y, -z'
 'x+1/2, y+1/2, z'
 '-x+1/2, y+1/2, -z'
 
_cell_length_a                    31.0626(16)
_cell_length_b                    6.8540(4)
_cell_length_c                    19.5825(11)
_cell_angle_alpha                 90
_cell_angle_beta                  119.507(3)
_cell_angle_gamma                 90
_cell_volume                      3628.4(4)
_cell_formula_units_Z             4
_cell_measurement_temperature     293(2)
_cell_measurement_reflns_used     8333
_cell_measurement_theta_min       1.51
_cell_measurement_theta_max       28.38
 
_exptl_crystal_description        Block
_exptl_crystal_colour             colorless
_exptl_crystal_density_meas       ?
_exptl_crystal_density_method     ?
_exptl_crystal_density_diffrn     1.434          
_exptl_crystal_F_000              1624
_exptl_transmission_factor_min    0.864
_exptl_transmission_factor_max    0.864
_exptl_crystal_size_max           0.220
_exptl_crystal_size_mid           0.200
_exptl_crystal_size_min           0.180
_exptl_absorpt_coefficient_mu     1.382
_shelx_estimated_absorpt_T_min    0.751
_shelx_estimated_absorpt_T_max    0.789
_exptl_absorpt_correction_type    multi-scan
_exptl_absorpt_correction_T_min   ?
_exptl_absorpt_correction_T_max   ?
_exptl_absorpt_process_details    sadabs
_exptl_absorpt_special_details    ?
_diffrn_ambient_temperature       293(2)
_diffrn_radiation_wavelength      0.71073
_diffrn_radiation_type            MoK\a
_diffrn_source                    ?
_diffrn_measurement_device_type   CCD
_diffrn_measurement_method        ?
_diffrn_detector_area_resol_mean  ?
_diffrn_reflns_number             11543
_diffrn_reflns_av_unetI/netI      0.0739
_diffrn_reflns_av_R_equivalents   0.0255
_diffrn_reflns_limit_h_min        -41
_diffrn_reflns_limit_h_max        29
_diffrn_reflns_limit_k_min        -9
_diffrn_reflns_limit_k_max        9
_diffrn_reflns_limit_l_min        -14
_diffrn_reflns_limit_l_max        26
_diffrn_reflns_theta_min          1.507
_diffrn_reflns_theta_max          28.381
_diffrn_reflns_theta_full         25.242
_diffrn_measured_fraction_theta_max   0.973
_diffrn_measured_fraction_theta_full  0.999
_diffrn_reflns_Laue_measured_fraction_max    0.973
_diffrn_reflns_Laue_measured_fraction_full   0.999
_diffrn_reflns_point_group_measured_fraction_max   0.972
_diffrn_reflns_point_group_measured_fraction_full  0.999
_reflns_number_total              8333
_reflns_number_gt                 5925
_reflns_threshold_expression      'I > 2\s(I)'
_reflns_Friedel_coverage          0.848
_reflns_Friedel_fraction_max      0.972
_reflns_Friedel_fraction_full     1.000
 
_reflns_special_details
;
 Reflections were merged by SHELXL according to the crystal
 class for the calculation of statistics and refinement.
 
 _reflns_Friedel_fraction is defined as the number of unique
 Friedel pairs measured divided by the number that would be
 possible theoretically, ignoring centric projections and
 systematic absences.
;
 
_computing_data_collection        ?
_computing_cell_refinement        ?
_computing_data_reduction         ?
_computing_structure_solution     ?
_computing_structure_refinement 'SHELXL-2014/7 (Sheldrick, 2014)'
_computing_molecular_graphics     ?
_computing_publication_material   ?
_refine_special_details
;
 Refined as a 2-component inversion twin.
;
_refine_ls_structure_factor_coef  Fsqd
_refine_ls_matrix_type            full
_refine_ls_weighting_scheme       calc
_refine_ls_weighting_details
'w=1/[\s^2^(Fo^2^)] where P=(Fo^2^+2Fc^2^)/3'
_atom_sites_solution_primary      ?
_atom_sites_solution_secondary    ?
_atom_sites_solution_hydrogens    mixed
_refine_ls_hydrogen_treatment     constr
_refine_ls_extinction_method      none
_refine_ls_extinction_coef        .
_refine_ls_abs_structure_details
;
 Refined as an inversion twin.
;
_refine_ls_abs_structure_Flack    -0.003(15)
_chemical_absolute_configuration  ad
_refine_ls_number_reflns          8333
_refine_ls_number_parameters      449
_refine_ls_number_restraints      1
_refine_ls_R_factor_all           0.0668
_refine_ls_R_factor_gt            0.0396
_refine_ls_wR_factor_ref          0.0791
_refine_ls_wR_factor_gt           0.0695
_refine_ls_goodness_of_fit_ref    0.982
_refine_ls_restrained_S_all       0.982
_refine_ls_shift/su_max           0.001
_refine_ls_shift/su_mean          0.000
 
loop_
 _atom_site_label
 _atom_site_type_symbol
 _atom_site_fract_x
 _atom_site_fract_y
 _atom_site_fract_z
 _atom_site_U_iso_or_equiv
 _atom_site_adp_type
 _atom_site_occupancy
 _atom_site_site_symmetry_order  
 _atom_site_calc_flag
 _atom_site_refinement_flags_posn
 _atom_site_refinement_flags_adp
 _atom_site_refinement_flags_occupancy
 _atom_site_disorder_assembly
 _atom_site_disorder_group
C1 C 0.47078(18) 0.9372(8) 0.8426(3) 0.0502(14) Uani 1 1 d . . . . .
H1 H 0.4967 1.0229 0.8716 0.060 Uiso 1 1 calc R U . . .
C2 C 0.44079(17) 0.6239(7) 0.7848(3) 0.0408(12) Uani 1 1 d . . . . .
H2 H 0.4468 0.4975 0.7743 0.049 Uiso 1 1 calc R U . . .
C3 C 0.39305(19) 0.6835(8) 0.7587(3) 0.0435(14) Uani 1 1 d . . . . .
H3 H 0.3671 0.5966 0.7318 0.052 Uiso 1 1 calc R U . . .
C4 C 0.4226(2) 0.9949(8) 0.8154(3) 0.0494(14) Uani 1 1 d . . . . .
H4 H 0.4166 1.1205 0.8267 0.059 Uiso 1 1 calc R U . . .
C5 C 0.38325(18) 0.8743(8) 0.7725(3) 0.0386(13) Uani 1 1 d . . . . .
C6 C 0.48040(14) 0.7494(9) 0.8265(2) 0.0371(11) Uani 1 1 d . . . . .
C7 C -0.0916(2) 0.0183(8) 0.3262(4) 0.0549(15) Uani 1 1 d . . . . .
H7 H -0.0972 -0.1074 0.3380 0.066 Uiso 1 1 calc R U . . .
C8 C -0.13022(18) 0.1496(8) 0.2932(3) 0.0391(13) Uani 1 1 d . . . . .
C9 C -0.12190(18) 0.3346(8) 0.2745(3) 0.0412(13) Uani 1 1 d . . . . .
H9 H -0.1480 0.4226 0.2511 0.049 Uiso 1 1 calc R U . . .
C10 C -0.07503(17) 0.3906(8) 0.2903(3) 0.0448(13) Uani 1 1 d . . . . .
H10 H -0.0697 0.5161 0.2779 0.054 Uiso 1 1 calc R U . . .
C11 C -0.03639(14) 0.2606(10) 0.3242(2) 0.0384(10) Uani 1 1 d . . . . .
C12 C -0.04473(17) 0.0718(8) 0.3420(3) 0.0527(15) Uani 1 1 d . . . . .
H12 H -0.0188 -0.0174 0.3644 0.063 Uiso 1 1 calc R U . . .
C13 C 0.09159(15) 0.4658(7) 0.3934(3) 0.0343(11) Uani 1 1 d . . . . .
H13 H 0.0973 0.3736 0.3605 0.041 Uiso 1 1 calc R U . . .
C14 C 0.11563(17) 0.6583(7) 0.3925(3) 0.0486(13) Uani 1 1 d . . . . .
H14A H 0.0960 0.7671 0.3936 0.058 Uiso 1 1 calc R U . . .
H14B H 0.1186 0.6685 0.3455 0.058 Uiso 1 1 calc R U . . .
C15 C 0.16674(18) 0.6596(8) 0.4656(4) 0.0665(18) Uani 1 1 d . . . . .
H15A H 0.1684 0.7588 0.5022 0.080 Uiso 1 1 calc R U . . .
H15B H 0.1921 0.6865 0.4516 0.080 Uiso 1 1 calc R U . . .
C16 C 0.17431(16) 0.4548(7) 0.5028(3) 0.0399(12) Uani 1 1 d . . . . .
C17 C 0.12061(18) 0.3913(8) 0.4790(3) 0.0361(13) Uani 1 1 d . . . . .
C18 C 0.66415(16) 0.7410(10) 0.9356(3) 0.0589(16) Uani 1 1 d . . . . .
H18A H 0.6721 0.6852 0.8976 0.071 Uiso 1 1 calc R U . . .
H18B H 0.6596 0.8805 0.9268 0.071 Uiso 1 1 calc R U . . .
C19 C 0.61716(16) 0.6465(7) 0.9283(3) 0.0372(11) Uani 1 1 d . . . . .
H19 H 0.6106 0.5256 0.8981 0.045 Uiso 1 1 calc R U . . .
C20 C 0.62900(15) 0.5930(7) 1.0133(3) 0.0376(11) Uani 1 1 d . . . . .
C21 C 0.68614(17) 0.5487(8) 1.0542(3) 0.0424(12) Uani 1 1 d . . . . .
C22 C 0.70451(19) 0.6990(11) 1.0176(3) 0.082(3) Uani 1 1 d . . . . .
H22A H 0.7137 0.8179 1.0484 0.099 Uiso 1 1 calc R U . . .
H22B H 0.7334 0.6495 1.0166 0.099 Uiso 1 1 calc R U . . .
C23 C 0.57196(15) 0.7758(10) 0.8877(2) 0.0413(10) Uani 1 1 d . . . . .
C24 C 0.1162(2) 0.1705(9) 0.4880(4) 0.0624(19) Uani 1 1 d . . . . .
H24A H 0.1431 0.1278 0.5373 0.094 Uiso 1 1 calc R U . . .
H24B H 0.1174 0.1030 0.4460 0.094 Uiso 1 1 calc R U . . .
H24C H 0.0854 0.1429 0.4863 0.094 Uiso 1 1 calc R U . . .
C25 C 0.20799(17) 0.4578(9) 0.5909(3) 0.0500(14) Uani 1 1 d . . . . .
C26 C 0.33181(19) 0.9395(9) 0.7469(3) 0.0459(13) Uani 1 1 d . . . . .
C27 C 0.19746(18) 0.3213(9) 0.4664(3) 0.067(2) Uani 1 1 d . . . . .
H27A H 0.2304 0.3649 0.4822 0.100 Uiso 1 1 calc R U . . .
H27B H 0.1779 0.3260 0.4102 0.100 Uiso 1 1 calc R U . . .
H27C H 0.1985 0.1898 0.4840 0.100 Uiso 1 1 calc R U . . .
C28 C 0.03589(16) 0.4813(7) 0.3604(3) 0.0370(11) Uani 1 1 d . . . . .
C29 C -0.17995(17) 0.0925(9) 0.2808(3) 0.0443(13) Uani 1 1 d . . . . .
C30 C 0.62001(19) 0.7660(12) 1.0531(3) 0.0745(18) Uani 1 1 d . . . . .
H30A H 0.5857 0.8012 1.0249 0.112 Uiso 1 1 calc R U . . .
H30B H 0.6397 0.8746 1.0537 0.112 Uiso 1 1 calc R U . . .
H30C H 0.6290 0.7316 1.1060 0.112 Uiso 1 1 calc R U . . .
C31 C 0.1013(2) 0.4953(10) 0.5282(3) 0.0634(17) Uani 1 1 d . . . . .
H31A H 0.0671 0.4638 0.5080 0.095 Uiso 1 1 calc R U . . .
H31B H 0.1049 0.6338 0.5255 0.095 Uiso 1 1 calc R U . . .
H31C H 0.1200 0.4532 0.5818 0.095 Uiso 1 1 calc R U . . .
C32 C 0.6958(2) 0.3385(9) 1.0358(4) 0.097(3) Uani 1 1 d . . . . .
H32A H 0.7308 0.3166 1.0600 0.146 Uiso 1 1 calc R U . . .
H32B H 0.6811 0.3222 0.9801 0.146 Uiso 1 1 calc R U . . .
H32C H 0.6816 0.2464 1.0561 0.146 Uiso 1 1 calc R U . . .
C33 C 0.70975(17) 0.5662(8) 1.1422(3) 0.0439(13) Uani 1 1 d . . . . .
C34 C 0.5976(2) 0.4235(10) 1.0146(4) 0.085(2) Uani 1 1 d . . . . .
H34A H 0.6094 0.3830 1.0679 0.127 Uiso 1 1 calc R U . . .
H34B H 0.5998 0.3164 0.9850 0.127 Uiso 1 1 calc R U . . .
H34C H 0.5637 0.4645 0.9919 0.127 Uiso 1 1 calc R U . . .
N1 N 0.01278(12) 0.3057(6) 0.3429(2) 0.0416(11) Uani 1 1 d . . . . .
H36 H 0.0296 0.2213 0.3534 0.050 Uiso 1 1 d R U . . .
N2 N 0.52817(13) 0.6758(6) 0.8534(2) 0.0413(10) Uani 1 1 d . . . . .
H35 H 0.5297 0.5634 0.8399 0.050 Uiso 1 1 d R U . . .
O1 O 0.32676(12) 1.1136(6) 0.7626(2) 0.0657(12) Uani 1 1 d . . . . .
O2 O 0.29724(12) 0.8224(6) 0.7117(2) 0.0619(12) Uani 1 1 d . . . . .
O3 O -0.21550(12) 0.2062(5) 0.2430(2) 0.0587(12) Uani 1 1 d . . . . .
O4 O -0.18285(11) -0.0633(6) 0.3111(2) 0.0569(10) Uani 1 1 d . . . . .
O5 O 0.20456(15) 0.5998(7) 0.6277(3) 0.0940(17) Uani 1 1 d . . . . .
O6 O 0.23585(12) 0.3157(6) 0.6240(2) 0.0598(12) Uani 1 1 d . . . . .
O7 O 0.01416(11) 0.6334(5) 0.3516(2) 0.0524(10) Uani 1 1 d . . . . .
O8 O 0.57471(12) 0.9537(5) 0.8895(2) 0.0551(10) Uani 1 1 d . . . . .
O9 O 0.46506(13) 0.2932(6) 0.1952(2) 0.0713(11) Uani 1 1 d . . . . .
H37 H 0.4575 0.1845 0.1745 0.107 Uiso 1 1 d R U . . .
H38 H 0.4798 0.2828 0.2442 0.107 Uiso 1 1 d R U . . .
O10 O 0.74229(12) 0.6936(5) 1.1769(2) 0.0586(11) Uani 1 1 d . . . . .
O11 O 0.69608(12) 0.4507(5) 1.1784(2) 0.0522(10) Uani 1 1 d . . . . .
Zn1 Zn 0.23792(2) 0.76496(9) 0.71603(3) 0.03949(14) Uani 1 1 d . . . . .
Zn2 Zn 0.26930(2) 1.26946(9) 0.73667(3) 0.03876(14) Uani 1 1 d . . . . .
 
loop_
 _atom_site_aniso_label
 _atom_site_aniso_U_11
 _atom_site_aniso_U_22
 _atom_site_aniso_U_33
 _atom_site_aniso_U_23
 _atom_site_aniso_U_13
 _atom_site_aniso_U_12
C1 0.039(3) 0.046(3) 0.066(4) -0.003(3) 0.026(3) 0.010(3)
C2 0.039(3) 0.036(3) 0.045(3) 0.001(2) 0.019(3) 0.011(2)
C3 0.036(3) 0.047(3) 0.047(3) 0.005(3) 0.020(3) 0.003(2)
C4 0.051(3) 0.044(3) 0.056(4) 0.002(3) 0.029(3) 0.016(3)
C5 0.030(3) 0.050(3) 0.039(3) 0.009(3) 0.019(2) 0.011(2)
C6 0.029(2) 0.045(3) 0.034(2) 0.004(3) 0.0126(18) 0.009(3)
C7 0.043(3) 0.039(3) 0.079(4) -0.002(3) 0.027(3) -0.008(2)
C8 0.029(3) 0.049(3) 0.035(3) -0.001(2) 0.013(2) -0.002(2)
C9 0.028(2) 0.054(4) 0.040(3) 0.008(2) 0.016(2) 0.000(2)
C10 0.032(3) 0.049(3) 0.050(3) 0.012(3) 0.018(2) -0.002(2)
C11 0.029(2) 0.045(3) 0.038(2) -0.006(3) 0.0139(18) -0.006(3)
C12 0.030(3) 0.040(3) 0.081(4) -0.004(3) 0.022(3) 0.004(2)
C13 0.028(2) 0.038(3) 0.033(3) -0.005(2) 0.013(2) -0.001(2)
C14 0.037(3) 0.049(3) 0.055(4) 0.005(3) 0.019(3) -0.007(2)
C15 0.037(3) 0.060(4) 0.078(5) 0.008(3) 0.008(3) -0.012(3)
C16 0.025(2) 0.046(3) 0.036(3) -0.010(2) 0.005(2) -0.002(2)
C17 0.027(3) 0.039(3) 0.032(3) -0.001(2) 0.007(2) -0.003(2)
C18 0.041(3) 0.091(5) 0.046(3) 0.014(4) 0.022(2) 0.009(4)
C19 0.026(2) 0.048(3) 0.032(3) -0.002(2) 0.010(2) 0.009(2)
C20 0.028(2) 0.047(3) 0.035(3) 0.003(2) 0.014(2) 0.005(2)
C21 0.028(2) 0.056(3) 0.035(3) 0.000(2) 0.010(2) 0.006(2)
C22 0.042(3) 0.153(8) 0.043(3) 0.035(4) 0.013(3) -0.009(4)
C23 0.035(2) 0.053(3) 0.029(2) 0.002(3) 0.0109(18) 0.005(4)
C24 0.051(4) 0.047(3) 0.061(5) 0.008(3) 0.005(3) -0.009(3)
C25 0.028(3) 0.059(4) 0.045(3) -0.018(3) 0.004(2) 0.001(3)
C26 0.040(3) 0.063(4) 0.036(3) 0.011(3) 0.021(3) 0.018(3)
C27 0.043(3) 0.100(6) 0.047(3) -0.009(3) 0.016(3) 0.018(3)
C28 0.027(2) 0.048(3) 0.029(3) 0.002(2) 0.008(2) -0.002(2)
C29 0.031(3) 0.056(4) 0.041(3) -0.008(3) 0.014(2) -0.011(3)
C30 0.070(4) 0.108(5) 0.040(3) 0.008(5) 0.023(3) 0.049(5)
C31 0.044(3) 0.106(5) 0.036(3) 0.000(3) 0.016(3) 0.010(3)
C32 0.104(5) 0.098(6) 0.067(5) -0.011(4) 0.025(4) 0.061(4)
C33 0.029(3) 0.055(4) 0.039(3) 0.006(3) 0.009(2) 0.009(3)
C34 0.053(4) 0.109(6) 0.060(4) 0.034(4) 0.003(3) -0.025(4)
N1 0.0263(18) 0.039(3) 0.057(3) -0.003(2) 0.0177(18) 0.0015(17)
N2 0.034(2) 0.042(2) 0.040(3) -0.0012(19) 0.0121(19) 0.0135(18)
O1 0.042(2) 0.068(3) 0.082(3) 0.000(2) 0.026(2) 0.028(2)
O2 0.0388(19) 0.078(4) 0.067(3) -0.005(2) 0.0246(19) 0.0078(19)
O3 0.0313(17) 0.077(3) 0.065(3) 0.019(2) 0.0217(18) 0.0038(17)
O4 0.034(2) 0.059(3) 0.063(3) 0.008(2) 0.0130(19) -0.0152(19)
O5 0.066(3) 0.088(3) 0.067(3) -0.051(3) -0.014(2) 0.019(3)
O6 0.049(2) 0.074(3) 0.038(2) -0.0041(19) 0.0076(16) 0.017(2)
O7 0.0341(18) 0.045(2) 0.062(3) 0.0038(19) 0.0112(18) 0.0087(17)
O8 0.046(2) 0.043(2) 0.065(3) 0.010(2) 0.0185(19) 0.0071(18)
O9 0.102(3) 0.039(2) 0.061(2) -0.003(2) 0.031(2) -0.019(2)
O10 0.047(2) 0.079(3) 0.040(2) -0.0023(19) 0.0138(17) -0.0212(19)
O11 0.0378(19) 0.064(3) 0.045(2) 0.021(2) 0.0127(18) 0.0044(18)
Zn1 0.0282(2) 0.0387(3) 0.0378(3) -0.0090(4) 0.0057(2) 0.0059(3)
Zn2 0.0265(2) 0.0388(3) 0.0408(3) -0.0070(4) 0.0088(2) 0.0061(3)
 
_geom_special_details
;
 All esds (except the esd in the dihedral angle between two l.s. planes)
 are estimated using the full covariance matrix.  The cell esds are taken
 into account individually in the estimation of esds in distances, angles
 and torsion angles; correlations between esds in cell parameters are only
 used when they are defined by crystal symmetry.  An approximate (isotropic)
 treatment of cell esds is used for estimating esds involving l.s. planes.
;
 
loop_
 _geom_bond_atom_site_label_1
 _geom_bond_atom_site_label_2
 _geom_bond_distance
 _geom_bond_site_symmetry_2
 _geom_bond_publ_flag
C1 C4 1.377(6) . ?
C1 C6 1.392(7) . ?
C2 C3 1.371(6) . ?
C2 C6 1.390(7) . ?
C3 C5 1.399(6) . ?
C4 C5 1.368(7) . ?
C5 C26 1.488(7) . ?
C6 N2 1.401(5) . ?
C7 C8 1.379(7) . ?
C7 C12 1.381(6) . ?
C8 C9 1.378(7) . ?
C8 C29 1.493(6) . ?
C9 C10 1.386(6) . ?
C10 C11 1.375(7) . ?
C11 C12 1.397(8) . ?
C11 N1 1.418(5) . ?
C13 C14 1.521(6) . ?
C13 C28 1.523(6) . ?
C13 C17 1.547(7) . ?
C14 C15 1.527(7) . ?
C15 C16 1.545(7) . ?
C16 C25 1.515(6) . ?
C16 C27 1.539(7) . ?
C16 C17 1.557(6) . ?
C17 C31 1.537(7) . ?
C17 C24 1.537(6) . ?
C18 C22 1.499(7) . ?
C18 C19 1.538(6) . ?
C19 C23 1.513(6) . ?
C19 C20 1.560(6) . ?
C20 C30 1.519(8) . ?
C20 C34 1.526(7) . ?
C20 C21 1.576(6) . ?
C21 C33 1.509(7) . ?
C21 C22 1.519(8) . ?
C21 C32 1.551(7) . ?
C23 O8 1.221(7) . ?
C23 N2 1.368(6) . ?
C25 O5 1.246(6) . ?
C25 O6 1.251(6) . ?
C26 O2 1.242(6) . ?
C26 O1 1.261(6) . ?
C28 O7 1.208(5) . ?
C28 N1 1.356(6) . ?
C29 O4 1.247(6) . ?
C29 O3 1.253(6) . ?
C33 O10 1.253(6) . ?
C33 O11 1.267(6) . ?
O1 Zn2 1.921(3) . ?
O2 Zn1 1.926(3) . ?
O3 Zn2 1.947(3) 2_546 ?
O4 Zn1 1.923(3) 2_546 ?
O5 Zn1 1.893(4) . ?
O6 Zn2 1.946(3) 1_545 ?
O10 Zn1 1.934(4) 2_657 ?
O11 Zn2 1.925(3) 2_647 ?
Zn1 O4 1.923(3) 2_566 ?
Zn1 O10 1.934(4) 2_657 ?
Zn2 O11 1.925(3) 2_667 ?
Zn2 O6 1.946(3) 1_565 ?
Zn2 O3 1.947(3) 2_566 ?
 
loop_
 _geom_angle_atom_site_label_1
 _geom_angle_atom_site_label_2
 _geom_angle_atom_site_label_3
 _geom_angle
 _geom_angle_site_symmetry_1
 _geom_angle_site_symmetry_3
 _geom_angle_publ_flag
C4 C1 C6 119.5(5) . . ?
C3 C2 C6 121.1(5) . . ?
C2 C3 C5 120.3(5) . . ?
C5 C4 C1 122.4(5) . . ?
C4 C5 C3 118.0(5) . . ?
C4 C5 C26 120.8(5) . . ?
C3 C5 C26 121.0(5) . . ?
C2 C6 C1 118.6(4) . . ?
C2 C6 N2 117.7(5) . . ?
C1 C6 N2 123.6(5) . . ?
C8 C7 C12 120.6(5) . . ?
C9 C8 C7 119.4(5) . . ?
C9 C8 C29 120.8(5) . . ?
C7 C8 C29 119.7(5) . . ?
C8 C9 C10 120.6(5) . . ?
C11 C10 C9 120.0(5) . . ?
C10 C11 C12 119.7(4) . . ?
C10 C11 N1 123.8(5) . . ?
C12 C11 N1 116.5(5) . . ?
C7 C12 C11 119.6(5) . . ?
C14 C13 C28 113.4(4) . . ?
C14 C13 C17 105.7(4) . . ?
C28 C13 C17 114.6(4) . . ?
C13 C14 C15 106.5(4) . . ?
C14 C15 C16 106.5(4) . . ?
C25 C16 C27 108.5(4) . . ?
C25 C16 C15 112.6(4) . . ?
C27 C16 C15 108.6(5) . . ?
C25 C16 C17 112.4(4) . . ?
C27 C16 C17 111.8(4) . . ?
C15 C16 C17 102.7(4) . . ?
C31 C17 C24 107.5(5) . . ?
C31 C17 C13 109.1(4) . . ?
C24 C17 C13 114.4(5) . . ?
C31 C17 C16 111.9(4) . . ?
C24 C17 C16 112.5(5) . . ?
C13 C17 C16 101.5(4) . . ?
C22 C18 C19 105.9(4) . . ?
C23 C19 C18 113.3(4) . . ?
C23 C19 C20 111.6(4) . . ?
C18 C19 C20 106.6(4) . . ?
C30 C20 C34 107.7(5) . . ?
C30 C20 C19 111.0(4) . . ?
C34 C20 C19 112.4(4) . . ?
C30 C20 C21 109.5(4) . . ?
C34 C20 C21 114.5(4) . . ?
C19 C20 C21 101.7(3) . . ?
C33 C21 C22 113.7(5) . . ?
C33 C21 C32 107.4(4) . . ?
C22 C21 C32 111.0(5) . . ?
C33 C21 C20 111.0(4) . . ?
C22 C21 C20 102.7(4) . . ?
C32 C21 C20 111.1(5) . . ?
C18 C22 C21 109.0(5) . . ?
O8 C23 N2 123.6(5) . . ?
O8 C23 C19 122.4(4) . . ?
N2 C23 C19 113.9(5) . . ?
O5 C25 O6 122.9(5) . . ?
O5 C25 C16 117.4(5) . . ?
O6 C25 C16 119.5(5) . . ?
O2 C26 O1 124.7(5) . . ?
O2 C26 C5 119.0(5) . . ?
O1 C26 C5 116.3(5) . . ?
O7 C28 N1 122.8(4) . . ?
O7 C28 C13 124.0(4) . . ?
N1 C28 C13 113.2(4) . . ?
O4 C29 O3 124.4(5) . . ?
O4 C29 C8 117.3(5) . . ?
O3 C29 C8 118.3(5) . . ?
O10 C33 O11 122.4(5) . . ?
O10 C33 C21 118.9(5) . . ?
O11 C33 C21 118.7(5) . . ?
C28 N1 C11 128.9(4) . . ?
C23 N2 C6 128.1(5) . . ?
C26 O1 Zn2 132.3(4) . . ?
C26 O2 Zn1 133.8(4) . . ?
C29 O3 Zn2 127.9(4) . 2_546 ?
C29 O4 Zn1 131.0(3) . 2_546 ?
C25 O5 Zn1 146.2(4) . . ?
C25 O6 Zn2 124.1(4) . 1_545 ?
C33 O10 Zn1 120.3(3) . 2_657 ?
C33 O11 Zn2 133.5(3) . 2_647 ?
O5 Zn1 O4 95.82(16) . 2_566 ?
O5 Zn1 O2 100.78(19) . . ?
O4 Zn1 O2 127.07(16) 2_566 . ?
O5 Zn1 O10 125.3(2) . 2_657 ?
O4 Zn1 O10 102.63(16) 2_566 2_657 ?
O2 Zn1 O10 107.38(16) . 2_657 ?
O1 Zn2 O11 94.56(16) . 2_667 ?
O1 Zn2 O6 107.34(16) . 1_565 ?
O11 Zn2 O6 129.33(16) 2_667 1_565 ?
O1 Zn2 O3 126.94(17) . 2_566 ?
O11 Zn2 O3 97.91(15) 2_667 2_566 ?
O6 Zn2 O3 103.56(15) 1_565 2_566 ?
 
loop_
 _geom_torsion_atom_site_label_1
 _geom_torsion_atom_site_label_2
 _geom_torsion_atom_site_label_3
 _geom_torsion_atom_site_label_4
 _geom_torsion
 _geom_torsion_site_symmetry_1
 _geom_torsion_site_symmetry_2
 _geom_torsion_site_symmetry_3
 _geom_torsion_site_symmetry_4
 _geom_torsion_publ_flag
C6 C2 C3 C5 1.2(8) . . . . ?
C6 C1 C4 C5 -0.2(8) . . . . ?
C1 C4 C5 C3 2.4(8) . . . . ?
C1 C4 C5 C26 177.5(5) . . . . ?
C2 C3 C5 C4 -2.9(8) . . . . ?
C2 C3 C5 C26 -178.0(5) . . . . ?
C3 C2 C6 C1 1.0(7) . . . . ?
C3 C2 C6 N2 177.8(4) . . . . ?
C4 C1 C6 C2 -1.6(8) . . . . ?
C4 C1 C6 N2 -178.2(5) . . . . ?
C12 C7 C8 C9 1.2(8) . . . . ?
C12 C7 C8 C29 -176.5(5) . . . . ?
C7 C8 C9 C10 -1.4(8) . . . . ?
C29 C8 C9 C10 176.3(5) . . . . ?
C8 C9 C10 C11 0.6(8) . . . . ?
C9 C10 C11 C12 0.5(7) . . . . ?
C9 C10 C11 N1 -179.5(4) . . . . ?
C8 C7 C12 C11 -0.1(9) . . . . ?
C10 C11 C12 C7 -0.8(8) . . . . ?
N1 C11 C12 C7 179.3(5) . . . . ?
C28 C13 C14 C15 145.3(5) . . . . ?
C17 C13 C14 C15 18.9(6) . . . . ?
C13 C14 C15 C16 7.1(6) . . . . ?
C14 C15 C16 C25 -151.1(5) . . . . ?
C14 C15 C16 C27 88.7(5) . . . . ?
C14 C15 C16 C17 -29.9(6) . . . . ?
C14 C13 C17 C31 81.2(5) . . . . ?
C28 C13 C17 C31 -44.4(6) . . . . ?
C14 C13 C17 C24 -158.4(5) . . . . ?
C28 C13 C17 C24 76.0(6) . . . . ?
C14 C13 C17 C16 -37.0(5) . . . . ?
C28 C13 C17 C16 -162.6(4) . . . . ?
C25 C16 C17 C31 45.6(6) . . . . ?
C27 C16 C17 C31 168.0(5) . . . . ?
C15 C16 C17 C31 -75.6(5) . . . . ?
C25 C16 C17 C24 -75.5(7) . . . . ?
C27 C16 C17 C24 46.9(7) . . . . ?
C15 C16 C17 C24 163.2(5) . . . . ?
C25 C16 C17 C13 161.8(4) . . . . ?
C27 C16 C17 C13 -75.8(5) . . . . ?
C15 C16 C17 C13 40.5(5) . . . . ?
C22 C18 C19 C23 136.1(5) . . . . ?
C22 C18 C19 C20 13.0(6) . . . . ?
C23 C19 C20 C30 -38.8(6) . . . . ?
C18 C19 C20 C30 85.4(5) . . . . ?
C23 C19 C20 C34 81.9(6) . . . . ?
C18 C19 C20 C34 -154.0(5) . . . . ?
C23 C19 C20 C21 -155.2(4) . . . . ?
C18 C19 C20 C21 -31.1(5) . . . . ?
C30 C20 C21 C33 41.4(6) . . . . ?
C34 C20 C21 C33 -79.7(6) . . . . ?
C19 C20 C21 C33 158.9(4) . . . . ?
C30 C20 C21 C22 -80.4(5) . . . . ?
C34 C20 C21 C22 158.5(5) . . . . ?
C19 C20 C21 C22 37.0(5) . . . . ?
C30 C20 C21 C32 160.8(5) . . . . ?
C34 C20 C21 C32 39.7(6) . . . . ?
C19 C20 C21 C32 -81.7(5) . . . . ?
C19 C18 C22 C21 11.5(7) . . . . ?
C33 C21 C22 C18 -150.9(5) . . . . ?
C32 C21 C22 C18 87.9(6) . . . . ?
C20 C21 C22 C18 -30.9(6) . . . . ?
C18 C19 C23 O8 -28.1(6) . . . . ?
C20 C19 C23 O8 92.2(6) . . . . ?
C18 C19 C23 N2 155.7(4) . . . . ?
C20 C19 C23 N2 -84.0(5) . . . . ?
C27 C16 C25 O5 157.6(5) . . . . ?
C15 C16 C25 O5 37.3(7) . . . . ?
C17 C16 C25 O5 -78.2(6) . . . . ?
C27 C16 C25 O6 -26.0(7) . . . . ?
C15 C16 C25 O6 -146.3(5) . . . . ?
C17 C16 C25 O6 98.2(6) . . . . ?
C4 C5 C26 O2 -176.1(5) . . . . ?
C3 C5 C26 O2 -1.1(8) . . . . ?
C4 C5 C26 O1 4.4(7) . . . . ?
C3 C5 C26 O1 179.4(5) . . . . ?
C14 C13 C28 O7 -16.7(7) . . . . ?
C17 C13 C28 O7 104.9(6) . . . . ?
C14 C13 C28 N1 164.4(4) . . . . ?
C17 C13 C28 N1 -74.0(5) . . . . ?
C9 C8 C29 O4 -167.8(5) . . . . ?
C7 C8 C29 O4 9.9(8) . . . . ?
C9 C8 C29 O3 9.9(8) . . . . ?
C7 C8 C29 O3 -172.4(5) . . . . ?
C22 C21 C33 O10 -2.1(7) . . . . ?
C32 C21 C33 O10 121.2(5) . . . . ?
C20 C21 C33 O10 -117.3(5) . . . . ?
C22 C21 C33 O11 178.3(4) . . . . ?
C32 C21 C33 O11 -58.5(6) . . . . ?
C20 C21 C33 O11 63.1(6) . . . . ?
O7 C28 N1 C11 -10.7(8) . . . . ?
C13 C28 N1 C11 168.2(4) . . . . ?
C10 C11 N1 C28 27.4(7) . . . . ?
C12 C11 N1 C28 -152.7(5) . . . . ?
O8 C23 N2 C6 -11.1(7) . . . . ?
C19 C23 N2 C6 165.1(4) . . . . ?
C2 C6 N2 C23 172.2(5) . . . . ?
C1 C6 N2 C23 -11.2(7) . . . . ?
O2 C26 O1 Zn2 -4.2(9) . . . . ?
C5 C26 O1 Zn2 175.2(3) . . . . ?
O1 C26 O2 Zn1 -41.0(8) . . . . ?
C5 C26 O2 Zn1 139.5(4) . . . . ?
O4 C29 O3 Zn2 36.5(8) . . . 2_546 ?
C8 C29 O3 Zn2 -141.1(4) . . . 2_546 ?
O3 C29 O4 Zn1 26.4(8) . . . 2_546 ?
C8 C29 O4 Zn1 -156.0(4) . . . 2_546 ?
O6 C25 O5 Zn1 34.0(12) . . . . ?
C16 C25 O5 Zn1 -149.8(6) . . . . ?
O5 C25 O6 Zn2 11.0(8) . . . 1_545 ?
C16 C25 O6 Zn2 -165.1(3) . . . 1_545 ?
O11 C33 O10 Zn1 -15.3(6) . . . 2_657 ?
C21 C33 O10 Zn1 165.0(3) . . . 2_657 ?
O10 C33 O11 Zn2 -55.7(7) . . . 2_647 ?
C21 C33 O11 Zn2 124.0(4) . . . 2_647 ?
C25 O5 Zn1 O4 175.9(9) . . . 2_566 ?
C25 O5 Zn1 O2 46.4(9) . . . . ?
C25 O5 Zn1 O10 -74.1(9) . . . 2_657 ?
 
loop_
 _geom_hbond_atom_site_label_D 
 _geom_hbond_atom_site_label_H 
 _geom_hbond_atom_site_label_A 
 _geom_hbond_distance_DH 
 _geom_hbond_distance_HA 
 _geom_hbond_distance_DA 
 _geom_hbond_angle_DHA 
 _geom_hbond_site_symmetry_A 
O9 H38 O7  0.84 2.10 2.882(5) 155.6 3_545
O9 H37 O8  0.82 1.96 2.770(5) 167.3 2_646
N2 H35 O9  0.82 2.01 2.832(6) 177.6 2_656
C19 H19 O9  0.98 2.68 3.486(6) 140.0 2_656
C12 H12 O7  0.93 2.66 3.474(6) 146.1 1_545
C10 H10 O7  0.93 2.41 2.934(6) 115.5 .
C1 H1 O8  0.93 2.32 2.891(6) 119.3 .
 
_refine_diff_density_max    0.243
_refine_diff_density_min   -0.355
_refine_diff_density_rms    0.058

_shelx_res_file
;

    I1.res created by SHELXL-2014/7


TITL I1 in I2                    New: C2
CELL  0.71073   31.0626    6.8540   19.5825    90.000   119.507    90.000
ZERR  4           0.0016    0.0004    0.0011     0.000     0.003     0.000
LATT -7
SYMM             - X ,              Y ,            - Z
SFAC
SFAC C   2.3100 20.8439  1.0200 10.2075  1.5886  0.5687  0.8650 51.6512  =
        0.2156  0.0033  0.0016 11.5000 0.680 12.01000
SFAC
SFAC H   0.4930 10.5109  0.3229 26.1257  0.1402  3.1424  0.0408 57.7998  =
        0.0030  0.0000  0.0000  0.6240 0.350  1.00800
SFAC
SFAC N  12.2126  0.0057  3.1322  9.8933  2.0125 28.9975  1.1663  0.5826  =
       -11.5290  0.0061  0.0033 19.6000 0.680 14.01000
SFAC
SFAC O   3.0485 13.2771  2.2868  5.7011  1.5463  0.3239  0.8670 32.9089  =
        0.2508  0.0106  0.0060 32.5000 0.680 16.00000
SFAC
SFAC Zn 14.0743  3.2655  7.0318  0.2333  5.1652 10.3163  2.4100 58.7098  =
        1.3041  0.2839  1.4301 5860.0000 1.450 65.39000
UNIT 136 160 8 44 8
L.S. 10
ACTA
BOND
FMAP 2
PLAN 20
HTAB O9 O7_$4
EQIV $4 x+1/2, y-1/2, z
HTAB O9 O8_$3
EQIV $3 -x+1, y-1, -z+1
HTAB N2 O9_$2
HTAB C19 O9_$2
EQIV $2 -x+1, y, -z+1
HTAB C12 O7_$1
EQIV $1 x, y-1, z
HTAB C10 O7
HTAB C1 O8
SIZE 0.22 0.2 0.1
HTAB
TWIN
CONF
SIZE 0.22 0.2 0.18
WGHT    0.000000
BASF  -0.00336
FVAR       0.06709
C1    1    0.470783    0.937183    0.842642    11.00000    0.03872    0.04589 =
         0.06588   -0.00259    0.02573    0.01006
AFIX  43
H1    2    0.496698    1.022908    0.871563    11.00000   -1.20000
AFIX   0
C2    1    0.440785    0.623948    0.784772    11.00000    0.03888    0.03591 =
         0.04513    0.00061    0.01870    0.01090
AFIX  43
H2    2    0.446750    0.497459    0.774346    11.00000   -1.20000
AFIX   0
C3    1    0.393050    0.683474    0.758723    11.00000    0.03594    0.04655 =
         0.04749    0.00473    0.02022    0.00338
AFIX  43
H3    2    0.367069    0.596607    0.731750    11.00000   -1.20000
AFIX   0
C4    1    0.422579    0.994920    0.815445    11.00000    0.05145    0.04377 =
         0.05593    0.00206    0.02867    0.01578
AFIX  43
H4    2    0.416552    1.120516    0.826667    11.00000   -1.20000
AFIX   0
C5    1    0.383250    0.874343    0.772541    11.00000    0.02953    0.04969 =
         0.03874    0.00876    0.01852    0.01069
C6    1    0.480400    0.749444    0.826488    11.00000    0.02890    0.04474 =
         0.03392    0.00369    0.01260    0.00898
C7    1   -0.091623    0.018303    0.326218    11.00000    0.04290    0.03897 =
         0.07869   -0.00170    0.02680   -0.00792
AFIX  43
H7    2   -0.097218   -0.107387    0.337984    11.00000   -1.20000
AFIX   0
C8    1   -0.130224    0.149635    0.293154    11.00000    0.02948    0.04905 =
         0.03488   -0.00131    0.01285   -0.00154
C9    1   -0.121901    0.334594    0.274509    11.00000    0.02834    0.05391 =
         0.03973    0.00841    0.01555   -0.00003
AFIX  43
H9    2   -0.147994    0.422603    0.251120    11.00000   -1.20000
AFIX   0
C10   1   -0.075029    0.390617    0.290285    11.00000    0.03234    0.04932 =
         0.04979    0.01225    0.01789   -0.00228
AFIX  43
H10   2   -0.069705    0.516107    0.277945    11.00000   -1.20000
AFIX   0
C11   1   -0.036386    0.260605    0.324195    11.00000    0.02877    0.04518 =
         0.03800   -0.00562    0.01388   -0.00586
C12   1   -0.044728    0.071779    0.342011    11.00000    0.03033    0.04015 =
         0.08058   -0.00410    0.02189    0.00364
AFIX  43
H12   2   -0.018846   -0.017399    0.364380    11.00000   -1.20000
AFIX   0
C13   1    0.091586    0.465811    0.393398    11.00000    0.02834    0.03847 =
         0.03310   -0.00479    0.01292   -0.00114
AFIX  13
H13   2    0.097323    0.373624    0.360455    11.00000   -1.20000
AFIX   0
C14   1    0.115632    0.658320    0.392499    11.00000    0.03685    0.04878 =
         0.05545    0.00523    0.01902   -0.00725
AFIX  23
H14A  2    0.096012    0.767103    0.393611    11.00000   -1.20000
H14B  2    0.118560    0.668461    0.345545    11.00000   -1.20000
AFIX   0
C15   1    0.166738    0.659570    0.465632    11.00000    0.03653    0.05974 =
         0.07758    0.00757    0.00841   -0.01240
AFIX  23
H15A  2    0.168411    0.758782    0.502188    11.00000   -1.20000
H15B  2    0.192066    0.686452    0.451618    11.00000   -1.20000
AFIX   0
C16   1    0.174314    0.454801    0.502773    11.00000    0.02474    0.04616 =
         0.03601   -0.01035    0.00522   -0.00165
C17   1    0.120607    0.391312    0.478953    11.00000    0.02707    0.03936 =
         0.03168   -0.00054    0.00660   -0.00313
C18   1    0.664145    0.740960    0.935599    11.00000    0.04090    0.09104 =
         0.04598    0.01424    0.02233    0.00897
AFIX  23
H18A  2    0.672072    0.685216    0.897597    11.00000   -1.20000
H18B  2    0.659629    0.880540    0.926774    11.00000   -1.20000
AFIX   0
C19   1    0.617158    0.646529    0.928335    11.00000    0.02567    0.04846 =
         0.03236   -0.00182    0.01039    0.00947
AFIX  13
H19   2    0.610644    0.525642    0.898079    11.00000   -1.20000
AFIX   0
C20   1    0.629004    0.592978    1.013270    11.00000    0.02802    0.04667 =
         0.03547    0.00331    0.01370    0.00478
C21   1    0.686138    0.548728    1.054240    11.00000    0.02838    0.05646 =
         0.03529    0.00048    0.01031    0.00557
C22   1    0.704508    0.698986    1.017559    11.00000    0.04165    0.15333 =
         0.04278    0.03453    0.01345   -0.00873
AFIX  23
H22A  2    0.713738    0.817920    1.048401    11.00000   -1.20000
H22B  2    0.733445    0.649470    1.016557    11.00000   -1.20000
AFIX   0
C23   1    0.571961    0.775824    0.887735    11.00000    0.03516    0.05348 =
         0.02891    0.00213    0.01089    0.00514
C24   1    0.116235    0.170520    0.488001    11.00000    0.05089    0.04658 =
         0.06064    0.00826    0.00506   -0.00908
AFIX 137
H24A  2    0.143143    0.127835    0.537312    11.00000   -1.50000
H24B  2    0.117397    0.102956    0.445996    11.00000   -1.50000
H24C  2    0.085436    0.142901    0.486344    11.00000   -1.50000
AFIX   0
C25   1    0.207992    0.457777    0.590928    11.00000    0.02829    0.05854 =
         0.04490   -0.01827    0.00402    0.00084
C26   1    0.331807    0.939525    0.746923    11.00000    0.04016    0.06344 =
         0.03632    0.01079    0.02054    0.01797
C27   1    0.197459    0.321333    0.466362    11.00000    0.04313    0.10037 =
         0.04725   -0.00856    0.01552    0.01762
AFIX 137
H27A  2    0.230434    0.364883    0.482189    11.00000   -1.50000
H27B  2    0.177855    0.326044    0.410203    11.00000   -1.50000
H27C  2    0.198531    0.189792    0.483974    11.00000   -1.50000
AFIX   0
C28   1    0.035889    0.481273    0.360383    11.00000    0.02658    0.04784 =
         0.02938    0.00250    0.00821   -0.00244
C29   1   -0.179953    0.092496    0.280756    11.00000    0.03116    0.05627 =
         0.04101   -0.00793    0.01438   -0.01063
C30   1    0.620013    0.766004    1.053140    11.00000    0.07006    0.10778 =
         0.03989    0.00786    0.02266    0.04935
AFIX 137
H30A  2    0.585655    0.801183    1.024881    11.00000   -1.50000
H30B  2    0.639713    0.874562    1.053699    11.00000   -1.50000
H30C  2    0.628990    0.731587    1.106030    11.00000   -1.50000
AFIX   0
C31   1    0.101336    0.495290    0.528166    11.00000    0.04439    0.10551 =
         0.03551    0.00005    0.01606    0.01024
AFIX 137
H31A  2    0.067066    0.463820    0.508006    11.00000   -1.50000
H31B  2    0.104874    0.633780    0.525464    11.00000   -1.50000
H31C  2    0.120034    0.453201    0.581762    11.00000   -1.50000
AFIX   0
C32   1    0.695841    0.338478    1.035829    11.00000    0.10354    0.09835 =
         0.06705   -0.01062    0.02452    0.06123
AFIX 137
H32A  2    0.730840    0.316601    1.059968    11.00000   -1.50000
H32B  2    0.681054    0.322233    0.980070    11.00000   -1.50000
H32C  2    0.681637    0.246436    1.056052    11.00000   -1.50000
AFIX   0
C33   1    0.709753    0.566244    1.142227    11.00000    0.02889    0.05461 =
         0.03866    0.00586    0.00933    0.00881
C34   1    0.597560    0.423489    1.014632    11.00000    0.05300    0.10912 =
         0.06007    0.03416    0.00318   -0.02509
AFIX 137
H34A  2    0.609378    0.382982    1.067867    11.00000   -1.50000
H34B  2    0.599812    0.316385    0.984954    11.00000   -1.50000
H34C  2    0.563714    0.464502    0.991933    11.00000   -1.50000
AFIX   0
N1    3    0.012783    0.305707    0.342883    11.00000    0.02626    0.03863 =
         0.05653   -0.00273    0.01768    0.00147
AFIX   3
H36   2    0.029613    0.221316    0.353404    11.00000   -1.20000
AFIX   0
N2    3    0.528166    0.675751    0.853448    11.00000    0.03377    0.04221 =
         0.04004   -0.00119    0.01215    0.01347
AFIX   3
H35   2    0.529656    0.563351    0.839897    11.00000   -1.20000
AFIX   0
O1    4    0.326757    1.113600    0.762609    11.00000    0.04196    0.06777 =
         0.08203   -0.00032    0.02640    0.02800
O2    4    0.297239    0.822415    0.711740    11.00000    0.03882    0.07839 =
         0.06671   -0.00541    0.02459    0.00780
O3    4   -0.215504    0.206215    0.243049    11.00000    0.03126    0.07734 =
         0.06502    0.01949    0.02169    0.00383
O4    4   -0.182847   -0.063343    0.311093    11.00000    0.03414    0.05906 =
         0.06332    0.00849    0.01304   -0.01525
O5    4    0.204557    0.599844    0.627661    11.00000    0.06557    0.08832 =
         0.06730   -0.05149   -0.01401    0.01886
O6    4    0.235846    0.315663    0.624032    11.00000    0.04880    0.07415 =
         0.03845   -0.00409    0.00761    0.01657
O7    4    0.014157    0.633416    0.351570    11.00000    0.03410    0.04463 =
         0.06217    0.00375    0.01116    0.00871
O8    4    0.574708    0.953684    0.889535    11.00000    0.04554    0.04345 =
         0.06489    0.00968    0.01846    0.00709
O9    4    0.465057    0.293243    0.195164    11.00000    0.10177    0.03922 =
         0.06131   -0.00321    0.03133   -0.01908
AFIX   3
H37   2    0.457457    0.184524    0.174504    11.00000   -1.50000
H38   2    0.479787    0.282783    0.244174    11.00000   -1.50000
AFIX   0
O10   4    0.742288    0.693646    1.176917    11.00000    0.04703    0.07937 =
         0.03952   -0.00231    0.01376   -0.02122
O11   4    0.696075    0.450696    1.178362    11.00000    0.03781    0.06353 =
         0.04519    0.02068    0.01268    0.00441
ZN1   5    0.237919    0.764962    0.716031    11.00000    0.02823    0.03867 =
         0.03784   -0.00901    0.00571    0.00586
ZN2   5    0.269303    1.269460    0.736671    11.00000    0.02653    0.03879 =
         0.04083   -0.00702    0.00881    0.00611
HKLF 4 1 -1.0000  0.0000 -1.0000  0.0000  1.0000  0.0000  1.0000  0.0000  0.0000

REM  I1 in I2                    New: C2
REM R1 =  0.0396 for    5925 Fo > 4sig(Fo)  and  0.0668 for all    8333 data
REM    449 parameters refined using      1 restraints

END

WGHT      0.0000      0.0000

REM Instructions for potential hydrogen bonds
HTAB C1 O8
HTAB C10 O7
HTAB C12 O7_$1
HTAB C19 O9_$2
HTAB N2 O9_$2
HTAB O9 O8_$3
HTAB O9 O7_$4

REM Highest difference peak  0.243,  deepest hole -0.355,  1-sigma level  0.058
Q1    1   0.7803  0.7786  1.1917  11.00000  0.05    0.24
Q2    1   0.1892  0.7616  0.4803  11.00000  0.05    0.23
Q3    1  -0.2027  0.2576  0.3065  11.00000  0.05    0.22
Q4    1   0.6267  0.3455  1.0698  11.00000  0.05    0.22
Q5    1   0.3578  0.6407  0.6859  11.00000  0.05    0.22
Q6    1   0.3052  0.7712  0.7581  11.00000  0.05    0.22
Q7    1   0.4966  0.9539  0.9382  11.00000  0.05    0.22
Q8    1   0.7027  0.3917  1.2203  11.00000  0.05    0.21
Q9    1   0.5598  0.7555  1.0487  11.00000  0.05    0.21
Q10   1   0.3529  1.2483  0.7663  11.00000  0.05    0.21
Q11   1   0.1491  0.7128  0.5179  11.00000  0.05    0.21
Q12   1   0.0688  0.7628  0.5528  11.00000  0.05    0.21
Q13   1   0.5669  0.2776  1.0900  11.00000  0.05    0.20
Q14   1  -0.1040  0.2697  0.1847  11.00000  0.05    0.20
Q15   1   0.4910  0.7403  0.9171  11.00000  0.05    0.20
Q16   1   0.2258  0.4157  0.4500  11.00000  0.05    0.20
Q17   1   0.1043  0.1414  0.3777  11.00000  0.05    0.20
Q18   1   0.6039  0.2786  0.8999  11.00000  0.05    0.20
Q19   1   0.3917  0.7671  0.7804  11.00000  0.05    0.20
Q20   1   0.1727  0.4076  0.3768  11.00000  0.05    0.20
;
_shelx_res_checksum   29665

_shelx_hkl_file
;
   0   0   2  285.04   11.84
   0   0   4   74.61    3.15
   0   0   6  105.54    4.40
   0   0   6  102.54    4.48
   0   0   8   19.61    0.97
   0   0   8   21.17    1.03
   0   0  10   26.98    1.33
   0   0  10   26.11    1.26
   0   0  12    1.62    0.24
   0   0  12    1.51    0.19
   0   0  12    1.91    0.30
   0   0  14   63.78    2.82
   0   0  14   60.31    2.93
   0   0  14   64.05    2.89
   0   0  16    3.00    0.31
   0   0 -16    3.36    0.36
   0   0  16    3.12    0.44
   0   0  18   -0.03    0.20
   0   0 -18    0.18    0.15
   0   0  20   34.34    1.87
   0   0 -20   34.46    1.70
   0   0  22    0.27    0.26
   0   0 -22    0.07    0.20
   0   0  24    2.17    0.49
   0   0  26   12.28    1.02
   0   0  28   12.13    1.18
   0   0  30    9.16    1.04
   0   0  32   10.50    1.16
   0   0  34    5.95    0.94
   0   0  36    6.99    1.03
   0  -1   1  206.09    8.71
   0  -1  -1  211.22    8.69
   0  -1  -3    6.02    0.32
   0  -1   3    6.27    0.35
   0  -1  -5   60.92    2.56
   0  -1   5   58.66    2.61
   0  -1   5   60.40    2.64
   0   1   5   61.16    2.77
   0  -1  -7   29.75    1.34
   0  -1   7   31.03    1.41
   0  -1   7   31.33    1.44
   0   1   7   29.31    1.47
   0   1   7   31.16    1.42
   0  -1   9    6.40    0.45
   0  -1   9    5.82    0.42
   0  -1  -9    6.10    0.38
   0   1   9    8.56    0.49
   0  -1 -11   25.38    1.25
   0  -1  11   23.26    1.35
   0  -1  11   25.28    1.32
   0   1  11   31.74    1.39
   0   1  11   30.36    1.38
   0  -1  13  137.64    5.71
   0  -1 -13  136.42    5.61
   0  -1  13  134.27    5.81
   0   1  13  127.81    5.97
   0   1  13  122.57    5.78
   0  -1 -15  105.51    4.52
   0  -1  15  106.47    4.62
   0  -1  15  104.74    4.72
   0   1  15  102.27    4.70
   0   1  15  104.67    4.81
   0  -1  17   49.85    2.50
   0  -1  17   52.19    2.42
   0  -1 -17   49.82    2.32
   0   1  17   51.06    2.50
   0   1  17   51.84    2.48
   0  -1  19   28.22    1.59
   0  -1  19   29.27    1.52
   0  -1 -19   27.28    1.40
   0   1  19   27.31    1.58
   0   1  19   28.75    1.49
   0  -1  21   67.50    3.24
   0  -1  21   68.06    3.36
   0   1  21   72.32    3.39
   0  -1  23   11.54    0.98
   0  -1  23   11.50    0.86
   0   1  23   12.84    0.98
   0  -1  25    3.82    0.62
   0   1 -25    3.93    0.53
   0   1  25    2.53    0.53
   0  -1  27    1.63    0.48
   0   1  27    2.08    0.52
   0  -1  29    1.07    0.46
   0   1  29    1.03    0.43
   0  -1  31    0.57    0.42
   0   1  31   -0.05    0.37
   0  -1  33    1.12    0.53
   0   1  33    1.62    0.56
   0  -1  35    0.51    0.46
   0   1  35    1.86    0.64
   0  -2   0  216.49    8.99
   0   2   0  212.01    9.53
   0  -2  -2  182.89    7.63
   0  -2   2  181.49    7.66
   0   2   2  176.03    8.12
   0   2  -2  185.88    8.09
   0  -2  -4  284.48   11.69
   0   2  -4  279.39   12.36
   0   2   4  275.95   12.44
   0  -2  -6   85.19    3.76
   0  -2   6   84.01    3.83
   0   2   6   90.62    3.82
   0   2   6   94.43    4.10
   0  -2  -8  248.65   10.33
   0  -2   8  245.66   10.43
   0  -2   8  254.03   10.52
   0   2   8  247.02   10.51
   0   2   8  240.20   11.05
   0  -2 -10   71.39    3.07
   0  -2  10   72.04    3.19
   0  -2  10   73.85    3.19
   0   2  10   68.48    3.36
   0   2  10   69.39    3.18
   0  -2  12    4.29    0.47
   0  -2  12    3.82    0.43
   0  -2 -12    3.93    0.33
   0   2  12    6.18    0.45
   0   2  12    6.32    0.49
   0  -2  14    3.18    0.41
   0  -2 -14    3.67    0.33
   0  -2  14    3.52    0.43
   0   2  14    3.06    0.41
   0   2  14    3.49    0.43
   0  -2 -16    0.11    0.13
   0  -2  16    0.26    0.20
   0  -2  16    0.18    0.20
   0   2  16   -0.06    0.18
   0   2  16    0.16    0.17
   0  -2  18   10.79    0.77
   0  -2 -18   11.02    0.65
   0  -2  18   10.14    0.78
   0   2  18    9.81    0.77
   0   2  18    9.09    0.74
   0  -2  20    9.57    0.79
   0  -2  20    8.15    0.70
   0   2  20    7.39    0.76
   0   2  20    7.77    0.68
   0  -2  22   -0.07    0.23
   0  -2  22    0.26    0.27
   0   2  22    1.12    0.33
   0   2  22    1.17    0.37
   0  -2  24   11.45    0.92
   0  -2  24   12.20    1.13
   0   2  24   14.00    1.04
   0  -2  26   18.31    1.26
   0  -2  26   18.41    1.36
   0   2  26   19.29    1.32
   0  -2  28   12.54    1.04
   0   2  28   13.80    1.13
   0  -2  30    6.50    0.90
   0   2  30    7.00    0.89
   0  -2  32    7.66    0.98
   0   2  32    6.28    0.91
   0  -2  34    1.76    0.60
   0   2  34    1.79    0.61
   0  -3   1   12.98    0.75
   0  -3  -1   14.02    0.75
   0   3  -1   12.99    0.80
   0   3   1   13.89    0.83
   0  -3   3   10.23    0.61
   0  -3  -3   10.15    0.58
   0   3   3    8.74    0.64
   0   3  -3    8.32    0.58
   0  -3   5    4.07    0.28
   0  -3  -5    3.77    0.32
   0  -3   5    3.98    0.41
   0   3  -5    2.96    0.33
   0   3   5    2.38    0.37
   0  -3  -7   43.06    1.98
   0  -3   7   44.04    2.00
   0  -3   7   43.75    2.09
   0   3   7   44.00    1.98
   0   3   7   44.36    2.23
   0   3  -7   44.68    2.09
   0  -3  -9   23.33    1.10
   0  -3   9   22.64    1.22
   0  -3   9   21.66    1.12
   0   3  -9   21.72    1.11
   0   3   9   22.06    1.12
   0   3   9   22.62    1.29
   0  -3 -11   99.59    4.33
   0  -3  11  100.65    4.48
   0  -3  11  100.88    4.45
   0   3  11   99.61    4.75
   0   3  11  101.55    4.43
   0  -3  13   46.22    2.26
   0  -3 -13   46.88    2.13
   0  -3  13   46.94    2.30
   0   3  13   47.53    2.43
   0   3  13   47.95    2.25
   0  -3  15   56.14    2.75
   0  -3 -15   55.38    2.57
   0  -3  15   55.98    2.77
   0   3  15   62.00    2.76
   0   3  15   59.81    2.93
   0  -3  17   39.50    2.02
   0  -3  17   39.18    2.03
   0   3  17   39.00    2.00
   0   3  17   38.68    2.12
   0  -3  19   34.61    1.87
   0  -3  19   34.11    1.86
   0   3  19   33.62    1.84
   0   3  19   34.89    1.93
   0  -3  21   14.16    1.02
   0  -3  21   14.52    1.04
   0   3  21   13.95    1.04
   0   3  21   13.43    1.00
   0  -3  23    2.68    0.54
   0  -3  23    3.23    0.55
   0   3  23    2.84    0.53
   0   3  23    3.89    0.58
   0  -3  25    6.99    0.84
   0  -3  25    6.37    0.80
   0   3  25    5.44    0.74
   0  -3  27    1.37    0.46
   0  -3  27    1.48    0.46
   0   3  27    0.90    0.41
   0  -3  29    2.47    0.56
   0  -3  29    0.97    0.48
   0   3  29    2.45    0.59
   0  -3  31    0.35    0.43
   0   3  31    0.43    0.43
   0  -3  33    0.36    0.46
   0   3  33    0.52    0.50
   0  -4   0   46.20    2.07
   0   4   0   39.94    2.18
   0  -4   2   44.92    2.22
   0  -4  -2   45.82    2.19
   0   4   2   51.21    2.42
   0   4  -2   45.97    2.33
   0  -4  -4  126.66    5.50
   0  -4   4  126.09    5.56
   0   4  -4  127.34    5.82
   0   4   4  126.89    5.92
   0  -4  -6   62.39    2.69
   0  -4   6   58.05    2.77
   0   4  -6   57.51    2.82
   0   4   6   57.83    2.96
   0  -4  -8   11.05    0.70
   0  -4   8   11.14    0.66
   0  -4   8   10.19    0.76
   0   4   8   12.33    0.64
   0   4  -8   10.73    0.71
   0   4   8   12.28    0.88
   0  -4 -10   19.17    1.02
   0  -4  10   19.24    1.02
   0  -4  10   19.19    1.15
   0   4 -10   19.06    1.04
   0   4  10   18.76    1.00
   0   4  10   19.21    1.23
   0  -4  12   16.55    0.94
   0  -4 -12   16.08    0.88
   0  -4  12   15.80    1.03
   0   4  12   14.82    1.08
   0   4  12   15.74    0.91
   0  -4  14    2.44    0.44
   0  -4  14    2.75    0.39
   0   4  14    1.27    0.37
   0   4  14    2.31    0.37
   0  -4  16    9.23    0.81
   0  -4  16   11.31    0.81
   0   4  16    9.48    0.88
   0   4  16   11.10    0.77
   0  -4  18    0.21    0.25
   0  -4  18    0.34    0.29
   0   4  18    0.49    0.28
   0   4  18   -0.02    0.28
   0  -4  20    0.80    0.36
   0  -4  20    0.23    0.28
   0   4  20    0.86    0.38
   0   4  20    0.51    0.30
   0  -4  22    9.53    0.96
   0  -4  22   10.19    1.04
   0   4  22   12.58    0.95
   0   4  22   12.34    1.01
   0  -4  24    7.73    0.88
   0  -4  24    8.06    0.94
   0   4  24    8.76    0.96
   0  -4  26    7.38    0.89
   0  -4  26    7.35    0.91
   0  -4  28    4.04    0.70
   0  -4  28    3.59    0.70
   0  -4  30    6.37    0.89
   0  -4  30    6.83    0.94
   0  -4  32    1.32    0.56
   0  -5  -1    1.77    0.34
   0  -5   1    1.50    0.32
   0   5  -1    2.22    0.39
   0   5   1    2.03    0.39
   0  -5   3    7.56    0.72
   0  -5  -3    7.15    0.59
   0   5  -3    7.81    0.67
   0   5   3    7.83    0.80
   0  -5   5    4.53    0.57
   0  -5  -5    6.33    0.59
   0   5  -5    6.43    0.64
   0   5   5    5.12    0.65
   0  -5   7    9.32    0.79
   0  -5  -7   11.40    0.74
   0   5   7   10.40    0.89
   0   5  -7   10.54    0.77
   0  -5   9   35.64    1.98
   0  -5  -9   37.85    1.86
   0   5  -9   39.15    1.96
   0   5   9   37.67    2.16
   0  -5  11   32.20    1.78
   0   5  11   31.07    1.90
   0  -5  13   12.29    0.95
   0   5  13   12.41    1.05
   0  -5  17   24.62    1.55
   0   5  17   24.30    1.64
   0  -5  19   15.24    1.16
   0   5  19   14.11    1.18
   0  -5  21   11.08    1.12
   0   5  21   12.13    1.07
   0  -5  23    7.10    0.93
   0   5  23    8.24    1.00
   0  -5  25    3.15    0.66
   0   5  25    3.46    0.70
   0  -5  27    0.23    0.42
   0   5  27   -0.01    0.39
   0  -5  29   -0.19    0.44
   0  -6   0   44.44    2.38
   0   6   0   50.74    2.59
   0  -6  -2   19.46    1.21
   0  -6   2   19.89    1.24
   0   6  -2   19.97    1.29
   0   6   2   18.11    1.30
   0  -6  -4   27.86    1.55
   0  -6   4   28.16    1.63
   0   6   4   28.38    1.74
   0   6  -4   27.28    1.64
   0  -6  -6    5.90    0.64
   0  -6   6    5.67    0.70
   0   6  -6    6.54    0.72
   0   6   6    6.64    0.82
   0  -6  -8    1.46    0.34
   0  -6   8    1.07    0.37
   0   6   8    2.08    0.50
   0  -6  10    6.17    0.76
   0   6  10    7.45    0.92
   0  -6  12    4.70    0.68
   0   6  12    4.50    0.71
   0  -6  14    0.45    0.33
   0   6  14    0.81    0.43
   0  -6  16   -0.30    0.25
   0   6  16    0.09    0.35
   0  -6  18   -0.04    0.32
   0   6  18    0.42    0.40
   0  -6  20    3.83    0.73
   0   6  20    3.52    0.72
   0  -6  22    2.77    0.65
   0   6  22    4.65    0.82
   0  -6  24    2.90    0.71
   0   6  24    2.94    0.69
   0   6  26    1.38    0.55
   0  -7   1    0.69    0.34
   0  -7  -1    0.82    0.35
   0   7  -1    0.62    0.40
   0   7   1    1.78    0.49
   0  -7   3    3.45    0.60
   0  -7  -3    1.66    0.43
   0   7  -3    2.03    0.50
   0   7   3    1.79    0.52
   0  -7  -5    6.43    0.72
   0  -7   5    4.91    0.70
   0   7  -5    4.89    0.71
   0   7   5    5.41    0.82
   0  -7   7    6.22    0.82
   0   7   7    6.67    0.89
   0  -7   9    9.76    1.03
   0   7   9    7.78    1.00
   0  -7  11    4.15    0.68
   0   7  11    5.36    0.86
   0  -7  13    6.10    0.85
   0   7  13    5.70    0.90
   0  -7  15   10.62    1.14
   0   7  15   10.79    1.26
   0  -7  17    2.73    0.64
   0   7  17    3.69    0.77
   0  -7  19    3.52    0.73
   0   7  19    4.60    0.88
   0   7  21    2.30    0.66
   0   7  23    1.19    0.55
   0  -8   0    4.88    0.77
   0   8   0    6.63    0.91
   0  -8  -2    2.11    0.51
   0  -8   2    2.41    0.56
   0   8  -2    2.92    0.64
   0   8   2    1.42    0.54
   0  -8   4    2.71    0.63
   0   8   4    3.89    0.76
   0  -8   6    7.10    0.92
   0   8   6    3.89    0.82
   0  -8   8    5.56    0.85
   0   8   8    6.21    0.97
   0  -8  10    1.40    0.51
   0   8  10    2.65    0.69
   0  -8  12    0.40    0.41
   0   8  12    0.64    0.54
   0   8  14    0.09    0.48
   0   8  16    0.32    0.46
   0  -9   1    0.24    0.45
   0   9   1   -0.03    0.48
   0   9  -1   -0.05    0.45
   0  -9   3   -0.17    0.41
   0   9   3    0.70    0.55
   0   9   5    1.50    0.62
   1   0  35    8.99    1.15
   1   0  33   15.91    1.35
   1   0  31   10.94    1.17
   1   0  29    7.63    0.94
   1   0  27    7.37    0.91
   1   0  25    1.19    0.40
   1   0  23    2.44    0.49
  -1   0 -21    0.18    0.19
   1   0  21    0.09    0.25
  -1   0 -19   11.49    0.71
   1   0  19   10.23    0.83
   1   0  17    3.19    0.34
   1   0  17    3.18    0.37
   1   0  17    3.30    0.46
  -1   0 -17    2.85    0.34
   1   0  15    1.19    0.28
   1   0  15    1.21    0.24
   1   0  15    1.50    0.22
   1   0  13   20.11    1.03
   1   0  13   20.26    1.12
   1   0  13   20.70    1.04
   1   0  11    8.95    0.59
   1   0  11    8.22    0.51
   1   0   9    0.69    0.14
   1   0   9    1.07    0.20
   1   0   7   27.59    1.25
   1   0   7   28.18    1.32
   1   0   5    0.23    0.10
   1   0   5    0.38    0.08
   1   0   3   39.99    1.70
   1   0  -3    0.86    0.10
   1   0  -5    5.37    0.31
  -1   0   5    5.34    0.33
   1   0  -7    0.01    0.08
  -1   0   7    0.00    0.09
  -1   0   7   -0.04    0.08
  -1   0   9    4.87    0.35
   1   0  -9    4.65    0.34
  -1   0   9    4.59    0.36
   1   0 -11    8.55    0.52
  -1   0  11    9.06    0.59
   1   0 -13   17.55    0.94
  -1   0  13   18.07    0.91
  -1   0  13   18.15    1.02
  -1   0  15    0.56    0.22
  -1   0  15    0.74    0.15
   1   0 -15    0.87    0.21
   1   0 -17   -0.16    0.11
  -1   0  17   -0.08    0.11
  -1   0  17   -0.31    0.14
  -1   0  19    3.58    0.50
   1   0 -19    3.34    0.41
   1   0 -21   17.86    1.03
  -1   0  21   16.79    1.16
  -1   0  23    5.26    0.68
   1   0 -23    5.91    0.61
  -1   0  25    3.75    0.62
  -1   0  27    0.74    0.40
  -1   0  29    0.37    0.37
  -1   0  31    4.95    0.79
  -1   0  33    0.50    0.45
  -1   0  35    4.04    0.78
   1  -1  34   -0.02    0.45
   1   1  34    0.44    0.48
   1  -1  32    0.35    0.43
   1   1  32    0.75    0.46
   1  -1  30    1.21    0.48
   1   1  30    1.16    0.51
   1  -1  28    0.90    0.44
   1   1  28    1.13    0.44
   1  -1  26    6.32    0.81
   1   1  26    4.72    0.71
   1  -1  24    7.52    0.73
   1  -1  24    6.20    0.77
   1   1  24    7.64    0.83
   1  -1  22    7.28    0.82
   1  -1  22    8.08    0.67
   1   1  22    6.39    0.75
   1  -1  20   21.92    1.27
   1  -1  20   21.22    1.15
   1   1  20   16.53    1.16
   1   1  20   17.03    1.09
   1  -1  18   31.96    1.73
   1  -1  18   30.94    1.63
  -1  -1 -18   32.65    1.53
   1   1  18   30.46    1.71
   1   1  18   32.69    1.66
   1  -1  16   27.00    1.41
  -1  -1 -16   28.00    1.32
   1  -1  16   28.67    1.51
   1   1  16   26.56    1.43
   1   1  16   27.17    1.48
  -1  -1 -14   25.95    1.23
   1  -1  14   25.58    1.32
   1  -1  14   27.10    1.41
   1   1  14   26.82    1.37
   1   1  14   25.01    1.38
   1  -1  12  151.39    6.83
   1  -1  12  152.04    6.70
  -1  -1 -12  152.03    6.61
   1   1  12  168.57    6.86
   1   1  12  161.61    7.07
  -1  -1 -10    2.43    0.20
   1  -1  10    2.21    0.29
   1  -1  10    2.40    0.28
   1   1  10    1.76    0.25
   1   1  10    1.53    0.25
   1  -1   8   11.07    0.60
   1  -1   8   11.10    0.62
  -1  -1  -8   11.24    0.52
   1   1   8   10.33    0.63
   1   1   8    9.46    0.60
   1  -1   6   59.24    2.54
   1  -1   6   58.03    2.49
  -1  -1  -6   58.36    2.42
   1   1   6   54.56    2.64
   1   1   6   55.47    2.52
  -1  -1  -4   57.16    2.37
   1  -1   4   57.76    2.44
   1   1   4   53.88    2.58
  -1  -1  -2  215.57    8.95
   1  -1   0   25.49    1.12
  -1  -1   0   24.76    1.10
   1  -1  -2  106.35    4.44
  -1  -1   2  104.28    4.45
  -1  -1   4    6.23    0.38
   1  -1  -4    6.05    0.34
  -1   1   4    5.68    0.39
   1  -1  -6    7.37    0.41
  -1  -1   6    8.01    0.45
  -1  -1   6    7.69    0.46
  -1   1   6    7.37    0.44
   1  -1  -8   13.61    0.67
  -1  -1   8   13.28    0.73
  -1  -1   8   12.63    0.72
  -1   1   8   13.80    0.72
  -1   1   8   13.40    0.73
  -1  -1  10   57.45    2.69
   1  -1 -10   58.70    2.59
  -1  -1  10   60.51    2.67
  -1   1  10   60.87    2.70
  -1   1  10   59.38    2.77
  -1  -1  12    8.81    0.64
   1  -1 -12    9.96    0.56
  -1  -1  12    9.07    0.61
  -1   1  12   10.45    0.61
  -1   1  12    8.88    0.63
   1  -1 -14    6.07    0.46
  -1  -1  14    6.80    0.53
  -1  -1  14    6.33    0.56
  -1   1  14    6.97    0.55
  -1   1  14    7.27    0.50
  -1  -1  16    7.12    0.57
   1  -1 -16    7.29    0.52
  -1  -1  16    7.31    0.61
  -1   1  16    7.43    0.60
  -1   1  16    8.47    0.56
   1  -1 -18    5.66    0.48
  -1  -1  18    6.40    0.62
  -1  -1  18    7.04    0.69
  -1   1  18    5.90    0.49
  -1   1  18    5.72    0.63
  -1  -1  20   14.99    0.97
   1  -1 -20   15.18    0.91
  -1  -1  20   15.34    1.02
  -1   1  20   13.64    0.99
   1  -1 -22   44.97    2.13
  -1  -1  22   43.16    2.20
  -1  -1  22   44.28    2.31
  -1   1  22   42.81    2.31
  -1  -1  24   -0.03    0.28
   1   1 -24    0.14    0.24
  -1   1  24    0.49    0.33
  -1  -1  26    2.34    0.54
  -1   1  26    4.78    0.67
   1   1 -26    3.60    0.52
  -1  -1  28    2.63    0.59
  -1   1  28    2.27    0.55
  -1  -1  30    0.84    0.44
  -1   1  30    0.28    0.41
  -1  -1  32    0.10    0.38
  -1   1  32    0.09    0.42
  -1  -1  34    0.41    0.42
  -1   1  34    0.61    0.48
  -1  -1  36    0.35    0.50
  -1   1  36   -0.05    0.42
   1  -2  35    2.17    0.63
   1   2  35    3.24    0.77
   1  -2  33    6.77    0.96
   1   2  33    6.30    0.92
   1  -2  31    3.72    0.73
   1   2  31    2.44    0.60
   1  -2  29    4.33    0.76
   1   2  29    5.66    0.83
   1  -2  27    9.53    1.03
   1  -2  27   10.24    0.98
   1   2  27    9.08    1.00
   1  -2  25    8.81    0.86
   1  -2  25    8.32    0.90
   1   2  25    5.77    0.79
   1  -2  23   11.32    0.89
   1  -2  23   13.88    1.05
   1   2  23   11.05    0.93
   1  -2  21    1.49    0.37
   1  -2  21    1.50    0.42
   1   2  21    2.23    0.41
   1   2  21    1.89    0.42
   1  -2  19    4.64    0.59
   1  -2  19    4.91    0.57
   1   2  19    5.29    0.62
   1   2  19    4.37    0.55
   1  -2  17    6.61    0.64
   1  -2  17    6.19    0.64
   1   2  17    6.36    0.64
   1   2  17    5.78    0.62
   1  -2  15    1.08    0.26
   1  -2  15    0.88    0.27
  -1  -2 -15    1.19    0.19
   1   2  15    0.90    0.25
   1   2  15    0.94    0.28
   1  -2  13    0.31    0.17
  -1  -2 -13    1.29    0.18
   1  -2  13    0.61    0.22
   1   2  13    0.89    0.25
   1   2  13    0.96    0.24
   1  -2  11    4.02    0.43
  -1  -2 -11    4.15    0.29
   1  -2  11    3.82    0.42
   1   2  11    3.68    0.43
   1   2  11    3.76    0.40
   1  -2   9   18.93    1.03
   1  -2   9   17.82    1.02
  -1  -2  -9   19.16    0.92
   1   2   9   21.30    1.12
   1   2   9   22.00    1.03
  -1  -2  -7   37.38    1.60
   1  -2   7   36.61    1.69
   1  -2   7   37.60    1.72
   1   2   7   33.52    1.80
   1   2   7   36.37    1.67
  -1  -2  -5    5.30    0.35
   1  -2   5    5.22    0.41
   1  -2   5    5.39    0.37
  -1   2  -5    7.28    0.40
   1   2   5    7.33    0.39
   1   2   5    7.58    0.49
   1  -2   3   49.82    2.25
  -1  -2  -3   49.93    2.20
   1   2   3   51.60    2.40
  -1   2  -3   50.89    2.34
   1  -2   1   11.65    0.63
  -1  -2  -1   10.79    0.60
   1   2   1   11.95    0.68
  -1   2  -1   12.66    0.67
   1  -2  -1    2.09    0.24
  -1  -2   1    2.27    0.24
  -1   2   1    2.69    0.28
   1   2  -1    2.57    0.27
   1  -2  -3   18.99    0.95
  -1  -2   3   20.26    0.98
  -1   2   3   19.47    1.04
   1   2  -3   20.13    0.99
  -1  -2   5    3.07    0.24
   1  -2  -5    2.97    0.27
  -1  -2   5    3.47    0.33
   1   2  -5    2.46    0.23
  -1   2   5    2.99    0.33
  -1  -2   7   11.26    0.63
  -1  -2   7   10.87    0.66
   1  -2  -7   11.35    0.61
  -1   2   7   11.46    0.61
  -1   2   7   11.94    0.71
  -1  -2   9    3.31    0.37
   1  -2  -9    3.50    0.29
  -1  -2   9    4.31    0.36
  -1   2   9    3.57    0.35
  -1   2   9    3.77    0.41
   1  -2 -11    7.73    0.48
  -1  -2  11    7.83    0.57
  -1  -2  11    8.78    0.59
  -1   2  11    8.01    0.55
  -1   2  11    8.27    0.60
   1  -2 -13    2.29    0.27
  -1  -2  13    2.66    0.36
  -1  -2  13    1.60    0.30
  -1   2  13    1.79    0.30
  -1   2  13    1.84    0.31
  -1  -2  15    4.70    0.54
   1  -2 -15    5.62    0.44
  -1  -2  15    6.65    0.62
  -1   2  15    5.85    0.56
  -1   2  15    5.70    0.51
  -1  -2  17    7.41    0.71
  -1  -2  17    6.73    0.68
   1  -2 -17    7.47    0.53
  -1   2  17    7.48    0.62
  -1   2  17    7.46    0.63
   1  -2 -19    6.16    0.50
  -1  -2  19    5.44    0.64
  -1  -2  19    6.01    0.69
  -1   2  19    6.66    0.65
  -1   2  19    6.33    0.67
  -1  -2  21    3.10    0.53
  -1  -2  21    2.80    0.48
  -1   2  21    3.04    0.51
  -1   2  21    3.64    0.49
  -1  -2  23    1.02    0.35
  -1  -2  23    1.18    0.41
  -1   2  23    1.69    0.44
  -1  -2  25    3.81    0.59
  -1  -2  25    2.43    0.56
  -1   2  25    3.91    0.62
  -1  -2  27    0.51    0.34
  -1  -2  27    0.57    0.38
  -1   2  27    0.65    0.39
  -1  -2  29    2.97    0.58
  -1  -2  29    3.83    0.69
   1   2 -29    3.75    0.59
  -1   2  29    2.83    0.61
  -1  -2  31    3.20    0.68
  -1   2  31    4.34    0.77
  -1  -2  33    1.34    0.54
  -1   2  33    2.13    0.62
  -1  -2  35    4.20    0.83
  -1   2  35    5.36    0.90
   1  -3  32    0.04    0.42
   1   3  32    0.34    0.45
   1  -3  30   -0.17    0.36
   1   3  30    0.13    0.40
   1  -3  28    2.98    0.59
   1  -3  28    3.85    0.69
   1   3  28    2.01    0.55
   1  -3  26    1.94    0.51
   1  -3  26    1.30    0.46
   1   3  26    0.90    0.44
   1  -3  24    7.78    0.86
   1  -3  24    6.37    0.79
   1   3  24    6.24    0.77
   1   3  24    6.69    0.81
   1  -3  22    2.04    0.48
   1  -3  22    3.12    0.53
   1   3  22    2.31    0.47
   1   3  22    2.33    0.47
   1  -3  20   16.55    1.16
   1  -3  20   17.57    1.18
   1   3  20   18.69    1.22
   1   3  20   18.68    1.18
   1  -3  18    4.03    0.55
   1  -3  18    4.27    0.55
   1   3  18    3.20    0.52
   1   3  18    2.82    0.46
   1  -3  16   26.33    1.52
   1  -3  16   28.82    1.56
   1   3  16   28.45    1.53
   1   3  16   30.18    1.66
   1  -3  14   17.60    1.06
   1  -3  14   17.82    1.03
   1   3  14   16.77    1.02
   1   3  14   16.30    1.11
  -1  -3 -12   25.87    1.21
   1  -3  12   27.58    1.40
   1  -3  12   25.60    1.33
   1   3  12   24.79    1.32
   1   3  12   22.89    1.44
   1  -3  10   19.76    1.05
   1  -3  10   17.99    0.97
  -1  -3 -10   18.72    0.89
   1   3  10   16.08    0.94
   1   3  10   15.99    1.08
  -1  -3  -8    8.66    0.51
   1  -3   8    9.03    0.55
   1  -3   8    8.26    0.60
  -1   3  -8    9.03    0.54
   1   3   8    7.80    0.64
   1   3   8    8.01    0.52
   1  -3   6   15.05    0.73
  -1  -3  -6   14.41    0.73
  -1   3  -6   13.72    0.78
   1   3   6   12.61    0.70
   1   3   6   13.14    0.87
   1  -3   4   24.83    1.22
  -1  -3  -4   24.11    1.15
   1  -3   4   24.20    1.09
  -1   3  -4   23.44    1.22
   1   3   4   21.86    1.29
   1   3   4   23.29    1.09
  -1  -3  -2    1.91    0.25
   1  -3   2    2.19    0.29
  -1   3  -2    2.36    0.31
   1   3   2    2.25    0.32
  -1  -3   0    4.59    0.36
   1  -3   0    4.41    0.42
  -1   3   0    4.53    0.40
   1   3   0    4.65    0.40
   1  -3  -2   12.89    0.72
  -1  -3   2   13.50    0.74
   1   3  -2   12.12    0.76
  -1   3   2   12.91    0.80
   1  -3  -4    7.66    0.49
  -1  -3   4    8.14    0.54
  -1   3   4    6.86    0.56
   1   3  -4    7.46    0.51
   1  -3  -6    6.98    0.46
  -1   3   6    6.53    0.55
   1   3  -6    6.78    0.46
  -1  -3   8   14.22    0.82
  -1  -3   8   12.89    0.73
   1  -3  -8   12.82    0.72
  -1   3   8   12.49    0.85
  -1   3   8   12.93    0.70
   1   3  -8   12.94    0.72
  -1  -3  10    4.51    0.43
  -1  -3  10    4.35    0.49
   1  -3 -10    4.06    0.38
   1   3 -10    4.38    0.33
  -1   3  10    4.67    0.52
  -1   3  10    4.34    0.37
  -1  -3  12   12.99    0.81
  -1  -3  12   12.18    0.75
   1  -3 -12   10.58    0.65
  -1   3  12   10.89    0.71
  -1   3  12   10.51    0.80
  -1  -3  14    5.36    0.57
   1  -3 -14    4.88    0.41
  -1  -3  14    4.86    0.52
  -1   3  14    4.17    0.54
  -1   3  14    4.83    0.50
  -1  -3  16    0.32    0.24
   1  -3 -16    0.27    0.17
  -1  -3  16    0.66    0.28
  -1   3  16    0.28    0.24
  -1   3  16    0.41    0.24
  -1  -3  18   12.53    0.90
  -1  -3  18   11.37    0.90
  -1   3  18   12.42    0.93
  -1   3  18   12.77    0.88
  -1  -3  20    3.97    0.57
  -1  -3  20    3.59    0.54
  -1   3  20    2.47    0.46
  -1   3  20    2.65    0.48
  -1  -3  22    3.55    0.58
  -1  -3  22    3.94    0.58
  -1   3  22    3.51    0.56
  -1   3  22    2.95    0.51
  -1  -3  24    3.38    0.57
  -1  -3  24    2.82    0.56
  -1   3  24    6.08    0.74
  -1   3  24    5.28    0.66
  -1  -3  26    4.00    0.66
  -1  -3  26    4.70    0.70
  -1   3  26    6.76    0.80
  -1  -3  28    0.74    0.43
  -1  -3  28    0.94    0.43
  -1   3  28    1.24    0.45
  -1  -3  30    0.83    0.42
  -1  -3  30    0.13    0.38
  -1   3  30    0.42    0.41
  -1  -3  32   -0.14    0.38
  -1   3  32   -0.02    0.43
  -1  -3  34    0.40    0.47
  -1   3  34    0.37    0.47
   1  -4  31    1.81    0.59
   1  -4  29    6.30    0.88
   1  -4  29    5.75    0.84
   1  -4  27    4.95    0.79
   1  -4  27    5.32    0.76
   1  -4  25    3.31    0.63
   1  -4  25    4.30    0.71
   1   4  25    4.90    0.71
   1   4  25    5.30    0.76
   1  -4  23    4.66    0.71
   1  -4  23    6.05    0.76
   1   4  23    6.52    0.77
   1   4  23    7.37    0.88
   1  -4  21    4.63    0.63
   1  -4  21    4.93    0.68
   1   4  21    5.46    0.66
   1   4  21    4.50    0.68
   1  -4  19    1.69    0.43
   1  -4  19    0.77    0.31
   1   4  19    1.70    0.40
   1   4  19    1.21    0.42
   1  -4  17    2.94    0.51
   1  -4  17    2.27    0.42
   1   4  17    1.73    0.44
   1   4  17    2.48    0.42
   1  -4  15   11.04    0.89
   1  -4  15   11.60    0.82
   1   4  15   11.86    0.80
   1   4  15   12.55    0.97
   1  -4  13    1.47    0.30
   1  -4  13    1.65    0.36
   1   4  13    1.23    0.29
   1   4  13    1.52    0.38
   1  -4  11    4.13    0.43
  -1  -4 -11    4.48    0.41
   1  -4  11    4.42    0.55
   1   4  11    3.97    0.43
   1   4  11    3.97    0.56
   1  -4   9    3.49    0.36
   1  -4   9    3.33    0.46
  -1  -4  -9    3.55    0.37
   1   4   9    2.84    0.49
   1   4   9    3.52    0.36
  -1   4  -9    3.53    0.39
  -1  -4  -7    8.55    0.57
   1  -4   7    8.14    0.53
   1  -4   7    9.02    0.68
  -1   4  -7    8.98    0.63
   1   4   7    9.44    0.74
   1   4   7    9.58    0.54
  -1  -4  -5   14.55    0.85
   1  -4   5   14.64    0.94
   1   4   5   15.84    0.76
  -1   4  -5   15.76    0.92
   1   4   5   14.62    1.00
  -1  -4  -3   41.29    1.94
   1  -4   3   40.71    1.99
  -1   4  -3   42.62    2.07
   1   4   3   38.35    2.11
   1  -4   1    1.23    0.27
  -1  -4  -1    1.39    0.26
   1   4   1    0.79    0.24
  -1   4  -1    0.81    0.24
   1  -4  -1    0.49    0.19
  -1  -4   1    0.03    0.15
  -1   4   1    0.25    0.19
   1   4  -1    0.49    0.22
  -1  -4   3    2.09    0.33
   1  -4  -3    2.52    0.33
  -1   4   3    2.18    0.38
   1   4  -3    1.81    0.32
   1  -4  -5    0.27    0.18
  -1  -4   5    0.34    0.22
  -1   4   5    0.51    0.24
   1   4  -5    0.40    0.20
  -1  -4   7    1.16    0.29
   1  -4  -7    1.63    0.28
   1   4  -7    1.67    0.29
  -1   4   7    1.66    0.35
   1  -4  -9    1.13    0.24
  -1  -4   9    1.26    0.30
   1   4  -9    1.20    0.24
  -1   4   9    1.52    0.34
   1  -4 -11    0.39    0.18
  -1  -4  11    0.52    0.21
  -1  -4  11    0.39    0.23
  -1   4  11    0.12    0.21
  -1  -4  13    0.97    0.27
   1  -4 -13    0.58    0.21
  -1  -4  13    1.40    0.35
  -1   4  13    1.10    0.34
  -1  -4  15    0.42    0.27
  -1  -4  15    0.40    0.25
  -1   4  15    0.99    0.34
  -1   4  15    0.68    0.26
  -1  -4  17    2.14    0.44
  -1  -4  17    2.50    0.42
  -1   4  17    3.23    0.54
  -1   4  17    1.95    0.38
  -1  -4  19    0.19    0.28
  -1  -4  19    0.28    0.27
  -1   4  19    0.29    0.28
  -1   4  19    0.06    0.26
  -1  -4  21    3.56    0.57
  -1  -4  21    3.68    0.60
  -1   4  21    4.77    0.68
  -1  -4  23    1.26    0.41
  -1  -4  23    1.00    0.42
  -1   4  23    0.97    0.40
  -1  -4  25    1.49    0.46
  -1  -4  25    1.30    0.45
  -1   4  25    1.20    0.44
  -1  -4  27    3.10    0.59
  -1  -4  27    1.53    0.53
  -1  -4  29    2.98    0.65
  -1  -4  29    2.86    0.60
  -1  -4  31    0.89    0.52
  -1  -4  31    0.72    0.48
   1  -5  28    0.30    0.41
   1  -5  26    1.16    0.54
   1   5  26    0.58    0.45
   1  -5  24    3.63    0.71
   1   5  24    4.65    0.79
   1  -5  22    7.54    0.92
   1   5  22    6.29    0.92
   1  -5  20    1.54    0.46
   1   5  20    3.17    0.64
   1  -5  18    7.09    0.84
   1   5  18    7.66    0.93
   1  -5  16   13.24    1.03
   1   5  16   12.68    1.11
   1  -5  14    5.18    0.66
   1   5  14    4.33    0.69
   1  -5  12   12.66    0.94
   1   5  12   10.97    0.99
   1  -5  10    0.66    0.31
   1   5  10    0.52    0.30
  -1  -5  -8    8.89    0.67
   1  -5   8    9.94    0.79
   1   5   8    9.56    0.86
  -1   5  -8   10.14    0.74
   1  -5   6    1.02    0.33
  -1  -5  -6    1.68    0.31
   1   5   6    1.62    0.41
  -1   5  -6    0.81    0.28
   1  -5   4    0.43    0.24
  -1  -5  -4   -0.03    0.17
   1   5   4    0.04    0.20
  -1   5  -4    0.33    0.23
   1  -5   2    0.99    0.27
  -1  -5  -2    0.81    0.25
  -1   5  -2    0.85    0.28
   1   5   2    1.20    0.34
  -1  -5   0    1.01    0.27
   1  -5   0    0.90    0.27
  -1   5   0    0.69    0.28
   1   5   0    1.33    0.32
  -1  -5   2    1.20    0.31
   1  -5  -2    0.80    0.26
  -1   5   2    1.42    0.35
   1   5  -2    1.42    0.33
   1  -5  -4    3.63    0.46
  -1  -5   4    3.12    0.47
  -1   5   4    2.94    0.49
   1   5  -4    2.75    0.42
   1  -5  -6    8.74    0.65
  -1  -5   6    7.92    0.68
   1   5  -6    7.69    0.66
  -1   5   6    8.64    0.75
   1  -5  -8    1.20    0.28
  -1  -5   8    0.92    0.31
   1   5  -8    1.32    0.32
  -1   5   8    1.26    0.38
   1  -5 -10    5.02    0.53
  -1  -5  10    4.77    0.61
  -1   5  10    4.83    0.66
   1  -5 -12   -0.12    0.18
  -1  -5  12    0.25    0.26
  -1   5  12    0.36    0.30
  -1  -5  14    3.76    0.57
  -1   5  14    3.42    0.60
  -1  -5  16    2.14    0.50
  -1   5  16    1.18    0.42
  -1  -5  18    1.78    0.47
  -1   5  18    1.46    0.45
  -1  -5  20    2.64    0.57
  -1   5  20    3.47    0.63
  -1  -5  22    2.56    0.60
  -1   5  22    4.06    0.67
  -1  -5  24    1.29    0.50
  -1   5  24    3.48    0.66
  -1  -5  26    0.62    0.44
  -1   5  26    0.76    0.45
  -1  -5  28    0.13    0.46
   1   6  27    0.55    0.51
   1  -6  25    0.62    0.49
   1   6  25    0.98    0.54
   1  -6  23    3.49    0.74
   1   6  23    4.69    0.81
   1  -6  21    1.98    0.57
   1   6  21    0.81    0.48
   1  -6  19   -0.10    0.31
   1   6  19    0.38    0.39
   1  -6  17   -0.03    0.30
   1   6  17    0.53    0.43
   1  -6  15    0.49    0.37
   1   6  15   -0.29    0.32
   1  -6  13    3.21    0.58
   1   6  13    3.11    0.64
   1  -6  11    1.08    0.40
   1   6  11    0.78    0.42
   1  -6   9    3.44    0.56
   1   6   9    2.39    0.57
  -1  -6  -7    0.10    0.22
   1  -6   7   -0.27    0.26
  -1   6  -7    0.45    0.31
   1   6   7   -0.23    0.27
  -1  -6  -5    0.13    0.22
   1  -6   5    0.48    0.30
  -1   6  -5    0.21    0.30
   1   6   5    0.52    0.34
  -1  -6  -3    5.55    0.61
   1  -6   3    5.43    0.67
   1   6   3    4.22    0.65
  -1   6  -3    3.92    0.60
  -1  -6  -1    3.03    0.49
   1  -6   1    3.30    0.53
  -1   6  -1    3.58    0.56
   1   6   1    4.22    0.62
   1  -6  -1    1.79    0.39
  -1  -6   1    1.28    0.38
  -1   6   1    2.14    0.46
   1   6  -1    1.54    0.42
   1  -6  -3    1.58    0.37
  -1  -6   3    0.91    0.36
   1   6  -3    1.22    0.37
  -1   6   3    1.26    0.40
   1  -6  -5    1.21    0.35
  -1  -6   5    1.01    0.36
   1   6  -5    1.98    0.43
  -1   6   5    1.34    0.43
  -1  -6   7    3.99    0.59
   1  -6  -7    3.64    0.51
  -1   6   7    4.13    0.66
   1   6  -7    3.42    0.51
  -1  -6   9    0.27    0.30
   1  -6  -9    0.21    0.23
  -1   6   9    0.06    0.28
  -1  -6  11    0.52    0.32
  -1   6  11    0.61    0.39
  -1  -6  13   -0.13    0.27
  -1   6  13    0.06    0.30
  -1  -6  15    0.64    0.36
  -1   6  15    0.51    0.41
  -1  -6  17    0.48    0.37
  -1   6  17    0.17    0.33
  -1  -6  19    0.12    0.34
  -1   6  19   -0.09    0.33
  -1  -6  21    0.42    0.40
  -1   6  21    1.20    0.49
  -1  -6  23   -0.09    0.37
  -1   6  23   -0.21    0.36
  -1  -6  25    1.78    0.60
  -1   6  25    1.23    0.51
  -1   6  27    0.40    0.48
   1   7  22    0.80    0.51
   1   7  20    1.46    0.62
   1  -7  18    1.32    0.50
   1   7  18    2.10    0.62
   1  -7  16    1.39    0.51
   1   7  16    1.42    0.54
   1  -7  14    2.02    0.54
   1   7  14    3.99    0.78
   1  -7  12    0.19    0.34
   1   7  12    1.08    0.50
   1  -7  10    0.52    0.37
   1   7  10    0.97    0.49
   1  -7   8    2.12    0.51
   1   7   8    1.59    0.51
   1  -7   6    1.56    0.46
   1   7   6    1.59    0.53
  -1   7  -6    2.29    0.51
   1  -7   4    0.27    0.31
  -1  -7  -4    0.29    0.28
   1   7   4    0.31    0.33
  -1   7  -4   -0.12    0.33
  -1  -7  -2    0.49    0.33
   1  -7   2    0.05    0.27
   1   7   2    0.14    0.33
  -1   7  -2    0.45    0.35
   1  -7   0   -0.17    0.23
  -1  -7   0    0.38    0.31
   1   7   0    0.04    0.33
  -1   7   0    0.23    0.34
   1  -7  -2    0.70    0.35
  -1  -7   2    0.85    0.38
  -1   7   2    0.48    0.39
   1   7  -2    0.90    0.38
   1  -7  -4    0.17    0.29
  -1  -7   4    0.17    0.29
   1   7  -4   -0.39    0.28
  -1   7   4    0.46    0.35
   1  -7  -6   -0.06    0.26
  -1  -7   6   -0.24    0.26
  -1   7   6   -0.12    0.34
  -1  -7   8    1.03    0.42
  -1   7   8    0.60    0.42
  -1  -7  10    0.20    0.32
  -1   7  10    0.37    0.40
  -1  -7  12    0.53    0.38
  -1   7  12    0.21    0.40
  -1  -7  14    0.25    0.38
  -1   7  14    0.82    0.47
  -1  -7  16    0.60    0.43
  -1   7  16    1.19    0.52
  -1  -7  18   -0.09    0.35
  -1   7  18    0.36    0.44
  -1  -7  20    0.03    0.42
  -1   7  20    0.44    0.45
  -1   7  22    0.05    0.45
   1   8  17    0.74    0.49
   1   8  15   -0.42    0.39
   1  -8  13    0.18    0.38
   1   8  13   -0.11    0.41
   1  -8  11    0.10    0.36
   1   8  11    0.42    0.44
   1  -8   9    0.76    0.42
   1   8   9    0.45    0.48
   1  -8   7    1.92    0.57
   1   8   7    1.43    0.59
   1  -8   5    0.38    0.40
   1   8   5    0.33    0.48
   1  -8   3    0.65    0.43
  -1   8  -3    0.14    0.43
   1   8   3    0.32    0.45
  -1  -8  -1    0.01    0.33
   1  -8   1    0.06    0.34
   1   8   1    0.04    0.35
  -1   8  -1   -0.48    0.37
  -1  -8   1    0.11    0.34
   1  -8  -1    0.44    0.39
  -1   8   1   -0.03    0.42
   1   8  -1   -0.23    0.35
  -1  -8   3   -0.22    0.33
   1  -8  -3   -0.11    0.34
   1   8  -3    0.26    0.40
  -1   8   3   -0.17    0.38
  -1  -8   5    0.94    0.44
  -1   8   5    1.33    0.56
  -1  -8   7   -0.13    0.32
  -1   8   7   -0.59    0.34
  -1  -8   9    0.06    0.38
  -1   8   9    0.17    0.46
  -1  -8  11    0.19    0.39
  -1   8  11   -0.15    0.44
  -1  -8  13    0.44    0.43
  -1   8  13   -0.05    0.39
  -1   8  15   -0.16    0.38
  -1   8  17   -0.24    0.40
   1   9   6   -0.28    0.49
   1   9   4    0.29    0.51
   1  -9   2    0.28    0.45
   1   9   2    0.06    0.49
   1  -9   0   -0.39    0.36
   1   9   0    0.05    0.50
  -1   9   0   -0.57    0.41
  -1   9   2   -0.08    0.48
  -1  -9   4   -0.14    0.42
  -1   9   4   -0.11    0.50
  -1   9   6    0.64    0.59
   2   0  34    0.01    0.43
   2   0  32    1.53    0.56
   2   0  30    2.66    0.64
   2   0  28    2.46    0.60
   2   0  26   -0.19    0.31
   2   0  24    3.70    0.62
   2   0  22    7.78    0.82
  -2   0 -20    2.23    0.33
   2   0  20    2.67    0.49
   2   0  18    0.06    0.20
   2   0  18    0.15    0.16
   2   0  16    0.07    0.18
   2   0  16   -0.03    0.13
   2   0  16    0.18    0.14
   2   0  14    1.49    0.30
   2   0  14    1.27    0.23
   2   0  12    1.11    0.19
   2   0  12    0.92    0.23
   2   0  10   38.98    1.86
   2   0  10   39.59    1.76
   2   0   8  131.35    5.63
   2   0   8  129.08    5.48
   2   0   6  171.70    7.35
   2   0   6  172.96    7.20
   2   0   4  265.33   11.01
   2   0   2 1000.00   41.46
   2   0   0  134.54    5.60
   2   0  -2  423.21   17.56
   2   0  -4   25.68    1.15
  -2   0   6  151.10    6.42
   2   0  -6  149.97    6.33
  -2   0   8   11.21    0.65
   2   0  -8   12.66    0.64
  -2   0  10    0.51    0.15
   2   0 -10    0.60    0.15
   2   0 -12   49.46    2.21
  -2   0  12   47.97    2.28
  -2   0  14    2.09    0.32
  -2   0  14    1.46    0.19
   2   0 -14    1.86    0.27
  -2   0  16   13.83    0.86
   2   0 -16   12.48    0.76
   2   0 -18    6.41    0.58
  -2   0  18    6.17    0.63
   2   0 -20    0.62    0.24
  -2   0  20    0.68    0.27
   2   0 -22   43.58    2.16
  -2   0  22   45.08    2.32
  -2   0  24   24.00    1.53
   2   0 -24   25.74    1.41
   2   0 -26   14.72    1.01
  -2   0  26   16.73    1.20
  -2   0  28   14.92    1.18
  -2   0  30   12.96    1.26
  -2   0  32    7.53    0.97
  -2   0  34   10.20    1.17
  -2   0  36    5.73    0.91
   2  -1  35    0.36    0.52
   2   1  35    0.29    0.47
   2  -1  33    1.34    0.57
   2   1  33    0.71    0.51
   2  -1  31    0.09    0.37
   2   1  31    0.39    0.41
   2  -1  29    0.66    0.44
   2   1  29    0.07    0.34
   2  -1  27    0.24    0.34
   2   1  27    0.87    0.41
   2  -1  25    3.10    0.58
   2   1  25    3.08    0.61
   2  -1  23   17.19    1.09
   2  -1  23   17.26    1.21
   2   1  23   15.89    1.17
   2  -1  21   10.66    0.89
   2  -1  21   10.60    0.79
   2   1  21   12.88    0.94
   2  -1  19   19.88    1.26
   2  -1  19   24.07    1.42
   2   1  19   26.28    1.34
   2   1  19   25.04    1.42
   2  -1  17   47.76    2.24
  -2  -1 -17   48.75    2.13
   2  -1  17   48.02    2.37
   2   1  17   46.06    2.32
   2   1  17   43.88    2.33
   2  -1  15   52.60    2.43
  -2  -1 -15   52.75    2.33
   2  -1  15   52.45    2.54
   2   1  15   52.97    2.55
   2   1  15   52.25    2.54
   2  -1  13   85.66    3.85
  -2  -1 -13   84.18    3.62
   2  -1  13   83.44    3.72
   2   1  13   84.95    3.83
   2   1  13   84.76    3.93
   2  -1  11   70.08    3.16
  -2  -1 -11   72.81    2.96
   2  -1  11   69.98    3.06
   2   1  11   67.36    3.23
   2   1  11   65.60    3.13
  -2  -1  -9   44.84    1.89
   2  -1   9   43.28    2.05
   2  -1   9   44.38    1.99
   2   1   9   44.02    2.05
  -2  -1  -7  169.10    7.16
   2  -1   7  173.61    7.27
   2  -1   7  170.84    7.37
   2   1   7  175.87    7.37
  -2  -1  -5   86.28    3.64
   2  -1   5   84.49    3.73
   2  -1   5   87.26    3.79
   2   1   5   92.58    3.79
  -2  -1  -3   64.88    2.71
   2  -1   3   64.91    2.79
  -2  -1  -1   24.78    1.08
   2  -1   1   24.72    1.12
  -2  -1   1   29.13    1.32
   2  -1  -1   30.40    1.33
   2  -1  -3   21.40    1.01
  -2  -1   3   20.88    1.03
  -2   1   3   24.06    1.09
  -2  -1   5   48.97    2.14
  -2  -1   5   47.97    2.13
   2  -1  -5   48.72    2.09
  -2   1   5   45.96    2.22
  -2  -1   7   22.39    1.13
   2  -1  -7   23.05    1.10
  -2  -1   7   22.56    1.15
  -2   1   7   26.24    1.13
  -2  -1   9   14.69    0.83
   2  -1  -9   15.54    0.79
  -2  -1   9   16.12    0.86
  -2   1   9   15.63    0.83
  -2   1   9   16.20    0.84
  -2  -1  11   14.07    0.81
   2  -1 -11   13.75    0.75
  -2  -1  11   14.49    0.82
   2  -1 -13   84.70    3.66
  -2  -1  13   83.11    3.78
  -2  -1  13   84.29    3.74
  -2   1  13   85.91    3.86
  -2   1  13   79.82    3.75
   2  -1 -15   68.27    3.13
  -2  -1  15   70.53    3.27
  -2  -1  15   71.20    3.22
  -2   1  15   69.14    3.28
  -2   1  15   72.58    3.26
   2  -1 -17   48.34    2.37
  -2  -1  17   51.17    2.47
  -2  -1  17   48.27    2.50
  -2   1  17   54.83    2.52
  -2   1  17   54.38    2.49
  -2  -1  19   73.27    3.49
  -2  -1  19   75.39    3.59
   2  -1 -19   74.43    3.42
  -2   1  19   79.15    3.57
  -2   1  19   76.09    3.57
  -2  -1  21   47.90    2.37
  -2  -1  21   46.80    2.45
   2  -1 -21   49.06    2.30
  -2   1  21   47.61    2.43
   2   1 -21   47.44    2.33
   2  -1 -23   31.80    1.66
  -2  -1  23   31.03    1.84
   2   1 -23   33.79    1.73
  -2   1  23   30.71    1.79
  -2  -1  25   16.46    1.15
   2   1 -25   14.40    1.01
  -2   1  25   13.48    1.09
  -2  -1  27    6.82    0.84
   2   1 -27    7.10    0.74
  -2   1  27    6.65    0.85
  -2  -1  29    2.26    0.54
  -2   1  29    2.19    0.58
  -2  -1  31    0.48    0.41
  -2   1  31    0.10    0.36
  -2  -1  33    0.12    0.38
  -2   1  33    0.26    0.42
  -2  -1  35    0.50    0.46
  -2   1  35    1.25    0.55
   2  -2  34    2.73    0.73
   2   2  34    4.66    0.84
   2  -2  32    1.01    0.54
   2   2  32    1.60    0.57
   2  -2  30    2.52    0.64
   2   2  30    1.20    0.53
   2  -2  28    5.06    0.78
   2   2  28    2.89    0.63
   2  -2  26    3.09    0.62
   2  -2  26    2.90    0.55
   2   2  26    5.13    0.73
   2  -2  24    7.02    0.77
   2  -2  24    6.34    0.82
   2   2  24    7.82    0.87
   2  -2  22    7.51    0.81
   2  -2  22    7.44    0.75
   2   2  22    7.63    0.76
   2   2  22    6.24    0.75
   2  -2  20    4.69    0.64
   2  -2  20    6.18    0.64
   2   2  20    5.83    0.64
   2   2  20    5.34    0.65
   2  -2  18    2.01    0.41
   2  -2  18    1.31    0.32
   2   2  18    2.44    0.41
   2   2  18    2.59    0.44
   2  -2  16    3.65    0.50
   2  -2  16    4.80    0.52
   2   2  16    4.04    0.50
   2   2  16    5.64    0.59
   2  -2  14    4.40    0.47
  -2  -2 -14    4.96    0.32
   2  -2  14    4.42    0.50
   2   2  14    4.56    0.49
   2   2  14    4.34    0.50
   2  -2  12   18.53    1.04
   2  -2  12   19.03    1.07
  -2  -2 -12   18.12    0.88
   2   2  12   21.16    1.13
   2   2  12   19.14    1.05
   2  -2  10   46.00    2.07
  -2  -2 -10   45.64    1.91
   2  -2  10   46.29    2.09
   2   2  10   40.89    2.05
   2   2  10   40.58    2.17
   2  -2   8   73.37    3.29
   2  -2   8   74.45    3.29
  -2  -2  -8   71.71    3.14
   2   2   8   78.07    3.29
   2   2   8   73.34    3.49
  -2  -2  -6  163.34    6.69
   2  -2   6  158.67    6.81
   2  -2   6  162.73    6.85
   2   2   6  156.78    7.23
   2   2   6  158.40    6.84
  -2  -2  -4   68.05    2.76
   2  -2   4   68.56    2.81
   2  -2   4   69.38    2.86
   2   2   4   61.25    2.81
   2   2   4   60.43    3.02
  -2   2  -4   59.39    2.94
   2  -2   2  130.53    5.39
  -2  -2  -2  130.79    5.33
  -2   2  -2  121.58    5.67
   2   2   2  122.59    5.72
   2  -2   0   25.59    1.27
  -2  -2   0   26.23    1.25
   2   2   0   28.52    1.37
  -2   2   0   28.27    1.35
   2  -2  -2  169.74    7.16
  -2  -2   2  170.43    7.17
   2   2  -2  166.61    7.57
  -2   2   2  172.12    7.60
   2  -2  -4  180.19    7.39
  -2  -2   4  177.77    7.42
   2   2  -4  169.47    7.78
  -2   2   4  173.13    7.85
  -2  -2   6  231.69    9.88
   2  -2  -6  233.00    9.77
  -2  -2   6  234.65    9.83
  -2   2   6  233.60    9.85
  -2   2   6  231.17   10.39
   2  -2  -8  198.09    8.38
  -2  -2   8  201.38    8.50
  -2  -2   8  203.32    8.47
  -2   2   8  195.08    8.93
  -2   2   8  196.81    8.46
  -2  -2  10  109.08    4.81
  -2  -2  10  107.98    4.81
   2  -2 -10  107.39    4.71
  -2   2  10  113.34    4.79
  -2   2  10  111.53    5.06
  -2  -2  12   13.37    0.76
   2  -2 -12   11.88    0.66
  -2  -2  12   13.63    0.78
  -2   2  12   10.09    0.69
  -2   2  12    9.15    0.71
   2  -2 -14    4.56    0.40
  -2  -2  14    4.50    0.52
  -2  -2  14    4.91    0.51
  -2   2  14    5.44    0.52
  -2   2  14    6.51    0.51
  -2  -2  16    1.96    0.36
  -2  -2  16    1.91    0.35
   2  -2 -16    1.42    0.25
  -2   2  16    1.02    0.27
  -2   2  16    1.33    0.29
   2  -2 -18   14.54    0.86
  -2  -2  18   14.40    0.97
  -2  -2  18   14.68    0.98
  -2   2  18   14.57    0.94
  -2   2  18   15.49    0.98
  -2  -2  20   11.08    0.84
  -2  -2  20   10.82    0.82
   2  -2 -20    9.58    0.70
  -2   2  20   10.68    0.77
  -2   2  20   10.88    0.83
  -2  -2  22   16.17    1.15
  -2  -2  22   18.54    1.22
  -2   2  22   18.49    1.19
  -2  -2  24   12.42    0.97
  -2  -2  24   12.46    1.01
  -2   2  24   13.55    1.01
  -2  -2  26   15.39    1.13
  -2  -2  26   15.23    1.16
  -2   2  26   16.28    1.17
  -2  -2  28   10.32    1.01
  -2  -2  28    8.69    1.01
   2   2 -28   11.34    0.92
  -2   2  28   10.44    1.08
  -2  -2  30    8.18    1.01
  -2   2  30    9.34    1.06
   2   2 -30    9.82    0.99
  -2  -2  32    7.38    0.98
  -2   2  32    6.39    0.89
  -2  -2  34    4.12    0.80
  -2   2  34    5.44    0.85
   2  -3  33    0.37    0.46
   2   3  33    0.80    0.53
   2  -3  31    0.46    0.44
   2   3  31    0.17    0.44
   2  -3  29   -0.17    0.35
   2   3  29   -0.02    0.38
   2  -3  27    0.30    0.38
   2  -3  27    0.14    0.38
   2   3  27    0.46    0.40
   2  -3  25    0.51    0.35
   2  -3  25    1.11    0.42
   2   3  25    1.03    0.43
   2  -3  23    4.70    0.64
   2  -3  23    4.14    0.64
   2   3  23    4.56    0.63
   2   3  23    2.19    0.50
   2  -3  21   10.61    0.87
   2  -3  21   10.11    0.88
   2   3  21   14.05    0.99
   2   3  21   11.43    0.91
   2  -3  19   13.10    0.94
   2  -3  19   13.18    0.92
   2   3  19    9.96    0.83
   2   3  19   10.49    0.90
   2  -3  17   29.64    1.68
   2  -3  17   28.32    1.67
   2   3  17   34.68    1.73
   2   3  17   33.43    1.82
   2  -3  15   27.27    1.44
   2  -3  15   25.41    1.41
   2   3  15   24.72    1.49
   2   3  15   24.54    1.39
   2  -3  13   63.18    2.96
   2  -3  13   64.56    2.98
   2   3  13   63.42    2.95
   2   3  13   62.51    3.16
   2  -3  11   70.40    3.32
  -2  -3 -11   72.73    3.16
   2  -3  11   72.36    3.35
   2   3  11   75.11    3.32
   2   3  11   75.80    3.58
  -2  -3  -9   52.13    2.36
   2  -3   9   55.24    2.54
   2  -3   9   50.73    2.46
   2   3   9   55.07    2.70
   2   3   9   56.59    2.47
  -2  -3  -7   13.17    0.67
   2  -3   7   14.68    0.73
   2  -3   7   13.70    0.80
  -2   3  -7   12.52    0.73
   2   3   7   11.18    0.82
   2   3   7   11.50    0.69
  -2  -3  -5   41.36    1.83
   2  -3   5   40.34    1.94
   2  -3   5   39.77    1.82
  -2   3  -5   39.54    1.96
   2   3   5   42.29    1.84
   2   3   5   40.41    2.07
   2  -3   3    8.34    0.57
  -2  -3  -3    7.04    0.50
   2   3   3    9.27    0.64
   2   3   3    9.67    0.48
  -2   3  -3    9.75    0.60
   2  -3   1    8.06    0.52
  -2  -3  -1    7.65    0.48
   2   3   1    7.28    0.40
  -2   3  -1    6.42    0.50
   2   3   1    6.33    0.52
   2  -3  -1    1.52    0.24
  -2  -3   1    2.06    0.26
  -2   3   1    1.85    0.28
   2   3  -1    1.55    0.26
   2  -3  -3    2.75    0.31
  -2  -3   3    2.48    0.30
  -2   3   3    1.30    0.26
   2   3  -3    1.42    0.25
  -2  -3   5    2.33    0.32
   2  -3  -5    2.51    0.29
   2   3  -5    3.11    0.32
  -2   3   5    2.40    0.35
  -2  -3   7    6.39    0.52
   2  -3  -7    6.95    0.47
  -2   3   7    6.02    0.53
   2   3  -7    6.50    0.45
  -2   3   7    6.36    0.40
  -2  -3   9   40.38    1.91
  -2  -3   9   39.95    1.98
   2  -3  -9   38.85    1.88
  -2   3   9   41.23    1.86
  -2   3   9   41.46    2.10
   2   3  -9   41.56    1.92
  -2  -3  11   45.19    2.08
   2  -3 -11   45.28    2.03
  -2  -3  11   43.33    2.13
   2   3 -11   42.34    2.01
  -2   3  11   43.78    2.24
  -2   3  11   41.75    2.02
   2  -3 -13   87.92    3.89
  -2  -3  13   89.85    4.01
  -2  -3  13   86.08    4.03
  -2   3  13   89.56    4.25
  -2   3  13   89.62    3.96
  -2  -3  15   63.28    2.99
   2  -3 -15   62.49    2.86
  -2  -3  15   63.33    3.03
  -2   3  15   63.20    2.95
  -2   3  15   65.48    3.17
   2  -3 -17   49.10    2.31
  -2  -3  17   48.55    2.45
  -2  -3  17   49.10    2.48
  -2   3  17   49.45    2.56
  -2   3  17   50.89    2.42
  -2  -3  19   32.38    1.89
  -2  -3  19   34.28    1.88
  -2   3  19   35.85    1.95
  -2   3  19   37.16    1.86
  -2  -3  21   11.78    0.94
  -2  -3  21   13.69    1.00
  -2   3  21   11.64    0.89
  -2   3  21   10.73    0.89
  -2  -3  23   25.83    1.62
  -2  -3  23   24.65    1.59
  -2   3  23   27.81    1.62
  -2   3  23   28.96    1.61
  -2  -3  25    9.99    1.02
  -2  -3  25   10.85    1.06
  -2   3  25   11.77    0.96
  -2  -3  27   10.08    1.06
  -2  -3  27   10.68    1.07
  -2   3  27    9.92    1.04
  -2  -3  29    1.40    0.51
  -2  -3  29    2.37    0.55
  -2   3  29    1.95    0.55
  -2  -3  31    1.62    0.55
  -2  -3  31    1.42    0.51
  -2   3  31    1.64    0.55
  -2  -3  33    1.13    0.54
  -2   3  33    1.47    0.57
   2  -4  30    0.28    0.42
   2  -4  28    2.86    0.63
   2  -4  28    3.03    0.64
   2  -4  26    7.02    0.87
   2  -4  26    9.11    1.02
   2   4  26    6.46    0.86
   2  -4  24    4.72    0.68
   2  -4  24    3.43    0.64
   2   4  24    3.68    0.63
   2   4  24    4.11    0.69
   2  -4  22    2.21    0.50
   2  -4  22    2.59    0.52
   2   4  22    1.70    0.46
   2   4  22    2.38    0.53
   2  -4  20    0.59    0.35
   2  -4  20    1.57    0.43
   2   4  20    1.96    0.43
   2   4  20    2.51    0.52
   2  -4  18    1.23    0.36
   2  -4  18    1.46    0.38
   2   4  18    1.31    0.40
   2   4  18    1.26    0.35
   2  -4  16    4.60    0.56
   2  -4  16    3.17    0.52
   2   4  16    4.33    0.53
   2   4  16    4.70    0.66
   2  -4  14    1.03    0.33
   2  -4  14    1.29    0.32
   2   4  14    1.88    0.43
   2   4  14    1.50    0.33
   2  -4  12    3.57    0.42
   2  -4  12    2.56    0.45
   2   4  12    4.53    0.61
   2   4  12    3.72    0.43
   2  -4  10    1.28    0.25
   2  -4  10    0.95    0.30
  -2  -4 -10    1.31    0.23
   2   4  10    1.93    0.41
   2   4  10    2.90    0.34
  -2  -4  -8   33.24    1.58
   2  -4   8   34.34    1.74
   2  -4   8   32.60    1.57
  -2   4  -8   32.08    1.69
   2   4   8   33.56    1.58
   2   4   8   33.98    1.87
  -2  -4  -6   50.57    2.24
   2  -4   6   47.64    2.35
   2   4   6   53.24    2.57
   2   4   6   46.90    2.19
  -2   4  -6   46.38    2.37
   2  -4   4   46.69    2.24
  -2  -4  -4   46.13    2.14
   2   4   4   46.07    2.40
  -2   4  -4   47.18    2.30
   2   4   4   45.02    2.06
   2  -4   2   75.03    3.32
  -2  -4  -2   77.98    3.27
   2   4   2   70.10    3.15
  -2   4  -2   71.09    3.47
   2   4   2   70.24    3.53
  -2  -4   0   58.63    2.63
   2  -4   0   57.44    2.66
  -2   4   0   54.40    2.79
   2   4   0   57.35    2.82
   2   4   0   57.22    2.49
   2  -4  -2   56.43    2.79
  -2  -4   2   61.01    2.82
   2   4  -2   63.23    2.99
   2   4  -2   63.73    2.68
  -2   4   2   60.57    3.00
  -2  -4   4   45.87    2.10
   2  -4  -4   45.64    2.07
  -2   4   4   39.94    2.21
   2   4  -4   41.38    2.16
   2  -4  -6   67.66    2.97
  -2  -4   6   65.93    3.03
  -2   4   6   64.07    3.21
   2   4  -6   62.30    3.09
  -2  -4   8   46.80    2.30
   2  -4  -8   48.38    2.22
  -2   4   8   48.34    2.46
   2   4  -8   45.32    2.28
  -2  -4  10   31.75    1.68
   2  -4 -10   32.05    1.57
   2   4 -10   31.55    1.58
  -2   4  10   30.54    1.77
  -2  -4  12    1.47    0.34
   2  -4 -12    1.79    0.30
  -2   4  12    1.57    0.37
  -2  -4  14    3.66    0.46
   2  -4 -14    3.10    0.39
  -2  -4  14    4.18    0.56
  -2   4  14    3.02    0.51
  -2  -4  16    0.09    0.22
  -2  -4  16    0.38    0.25
  -2   4  16    0.21    0.26
  -2  -4  18    3.52    0.57
  -2  -4  18    4.55    0.58
  -2   4  18    4.65    0.64
  -2  -4  20    2.74    0.51
  -2  -4  20    3.96    0.62
  -2   4  20    5.66    0.71
  -2  -4  22    1.87    0.48
  -2  -4  22    2.88    0.53
  -2   4  22    3.17    0.56
  -2  -4  24    7.68    0.85
  -2  -4  24    5.65    0.80
  -2   4  24    6.09    0.81
  -2  -4  26    6.01    0.85
  -2  -4  26    5.04    0.74
  -2  -4  28    8.95    1.06
  -2  -4  28   11.05    1.12
  -2  -4  30    7.04    0.98
  -2  -4  30    4.75    0.80
  -2  -4  32    4.13    0.79
  -2  -4  32    3.89    0.76
   2  -5  29    0.37    0.51
   2  -5  27    0.68    0.46
   2   5  27    0.37    0.47
   2  -5  25    0.31    0.42
   2   5  25    1.49    0.53
   2  -5  23    1.93    0.53
   2   5  23    1.62    0.55
   2  -5  21    7.04    0.86
   2   5  21    5.63    0.84
   2  -5  19    6.58    0.81
   2   5  19    6.57    0.89
   2  -5  17   15.29    1.13
   2   5  17   14.63    1.21
   2  -5  15   11.85    0.94
   2   5  15   10.66    1.10
   2  -5  13   12.83    1.01
   2   5  13   14.97    1.15
   2  -5  11    9.70    0.82
   2   5  11    8.98    0.96
   2  -5   9    4.35    0.60
   2   5   9    5.64    0.73
  -2   5  -9    6.54    0.61
  -2  -5  -7   23.58    1.33
   2  -5   7   26.56    1.50
   2   5   7   28.74    1.64
  -2   5  -7   26.11    1.46
   2  -5   5    5.30    0.62
  -2  -5  -5    5.28    0.53
  -2   5  -5    6.25    0.63
   2   5   5    5.78    0.70
  -2  -5  -3    7.17    0.58
   2  -5   3    7.30    0.71
  -2   5  -3    7.18    0.72
   2   5   3    6.35    0.74
   2  -5   1   12.63    0.84
  -2  -5  -1   10.64    0.78
  -2   5  -1   11.15    0.85
   2   5   1   12.55    0.90
   2  -5  -1    0.50    0.23
  -2  -5   1    0.66    0.24
   2   5  -1    0.40    0.25
  -2   5   1    0.44    0.26
  -2  -5   3    9.28    0.69
   2  -5  -3    7.30    0.63
  -2   5   3    8.37    0.73
   2   5  -3    8.07    0.67
   2  -5  -5   14.31    0.90
  -2  -5   5   12.98    0.92
   2   5  -5   12.90    0.91
  -2   5   5   13.90    1.00
   2  -5  -7   10.92    0.76
  -2  -5   7   12.20    0.85
  -2   5   7   10.39    0.87
   2   5  -7   11.02    0.78
   2  -5  -9   31.81    1.69
  -2  -5   9   33.55    1.81
   2   5  -9   33.43    1.74
  -2   5   9   33.90    1.93
  -2  -5  11   14.66    1.06
   2  -5 -11   16.13    0.95
  -2   5  11   13.49    1.08
   2  -5 -13   37.77    1.86
  -2  -5  13   38.85    2.04
  -2   5  13   34.29    2.10
  -2  -5  15   21.46    1.45
  -2   5  15   25.10    1.57
  -2  -5  17   18.61    1.30
  -2   5  17   18.81    1.34
  -2  -5  19   29.11    1.69
  -2   5  19   22.92    1.64
  -2  -5  21   11.18    1.15
  -2   5  21   14.21    1.14
  -2  -5  23    9.77    1.07
  -2   5  23    8.99    1.02
  -2  -5  25    3.54    0.71
  -2   5  25    4.12    0.73
  -2  -5  27    1.41    0.55
  -2   5  27    1.70    0.55
  -2  -5  29   -0.05    0.40
   2   6  26    1.16    0.58
   2  -6  24    1.75    0.61
   2   6  24    1.94    0.64
   2  -6  22    2.10    0.61
   2   6  22    0.66    0.46
   2  -6  20    1.62    0.53
   2   6  20    1.11    0.52
   2  -6  18    1.14    0.44
   2   6  18    0.21    0.37
   2  -6  16    0.38    0.34
   2   6  16    0.09    0.38
   2  -6  14    0.56    0.35
   2   6  14    0.88    0.46
   2  -6  12    1.71    0.46
   2   6  12    2.10    0.53
   2  -6  10    0.58    0.32
   2   6  10    2.09    0.53
   2  -6   8   16.04    1.12
  -2   6  -8   15.33    1.04
   2   6   8   13.35    1.17
   2  -6   6    0.77    0.36
  -2   6  -6    2.14    0.43
   2   6   6    1.32    0.43
  -2  -6  -4   16.28    0.99
   2  -6   4   13.73    1.02
  -2   6  -4   13.48    1.04
   2   6   4   13.18    1.11
   2  -6   2   37.81    2.06
  -2  -6  -2   38.92    2.02
  -2   6  -2   37.70    2.16
   2   6   2   41.40    2.26
   2  -6   0   28.50    1.59
  -2  -6   0   28.92    1.57
  -2   6   0   25.39    1.65
   2   6   0   26.30    1.67
  -2  -6   2   25.78    1.50
   2  -6  -2   25.54    1.48
  -2   6   2   26.17    1.62
   2   6  -2   24.98    1.56
   2  -6  -4   16.66    1.11
  -2  -6   4   17.13    1.15
   2   6  -4   17.01    1.16
  -2   6   4   18.75    1.30
  -2  -6   6   15.06    1.10
   2  -6  -6   17.55    1.09
  -2   6   6   15.77    1.20
   2   6  -6   15.70    1.10
   2  -6  -8    1.17    0.34
  -2  -6   8    1.21    0.37
  -2   6   8    2.03    0.51
  -2  -6  10    5.48    0.71
   2  -6 -10    6.05    0.64
  -2   6  10    4.90    0.74
  -2  -6  12    1.85    0.46
  -2   6  12    1.46    0.45
  -2  -6  14    7.21    0.83
  -2   6  14    5.15    0.79
  -2  -6  16    2.15    0.53
  -2   6  16    2.73    0.60
  -2  -6  18    0.32    0.36
  -2   6  18    0.11    0.32
  -2  -6  20   -0.04    0.35
  -2   6  20    0.12    0.37
  -2  -6  22    2.16    0.61
  -2   6  22    1.39    0.51
  -2  -6  24    1.79    0.58
  -2   6  24    1.67    0.56
  -2   6  26    5.72    0.88
   2   7  21    1.03    0.58
   2  -7  19    1.15    0.54
   2   7  19    0.41    0.49
   2  -7  17    4.33    0.77
   2   7  17    3.74    0.79
   2  -7  15    6.06    0.87
   2   7  15    5.55    0.92
   2  -7  13    4.01    0.70
   2   7  13    4.81    0.86
   2  -7  11    6.22    0.84
   2   7  11    7.18    1.00
   2  -7   9    3.04    0.60
   2   7   9    3.91    0.75
   2  -7   7    7.00    0.87
   2   7   7    9.60    1.08
   2  -7   5    0.38    0.33
  -2   7  -5    1.20    0.45
   2   7   5    2.11    0.55
  -2  -7  -3    2.21    0.47
   2  -7   3    1.48    0.43
   2   7   3    1.48    0.49
  -2   7  -3    1.10    0.45
   2  -7   1    0.19    0.29
  -2  -7  -1   -0.22    0.26
   2   7   1    0.13    0.29
  -2   7  -1    0.03    0.35
   2  -7  -1   -0.11    0.26
  -2  -7   1    0.07    0.27
  -2   7   1    0.24    0.37
   2   7  -1    0.25    0.30
  -2  -7   3    1.20    0.40
   2  -7  -3    1.49    0.40
  -2   7   3    1.13    0.48
   2   7  -3    2.03    0.50
   2  -7  -5    7.46    0.79
  -2  -7   5    4.84    0.70
  -2   7   5    5.94    0.83
   2   7  -5    6.79    0.81
  -2  -7   7    2.23    0.52
   2  -7  -7    2.42    0.48
  -2   7   7    3.58    0.68
  -2  -7   9    7.84    0.92
  -2   7   9    7.50    0.97
  -2  -7  11    6.74    0.86
  -2   7  11    5.86    0.89
  -2  -7  13   11.91    1.20
  -2   7  13   11.87    1.28
  -2  -7  15    6.11    0.87
  -2   7  15    4.81    0.84
  -2  -7  17   11.53    1.20
  -2   7  17    8.26    1.09
  -2  -7  19    5.21    0.86
  -2   7  19    6.24    0.94
  -2   7  21    2.55    0.66
  -2   7  23    0.88    0.57
   2   8  16    0.37    0.53
   2   8  14   -0.21    0.40
   2  -8  12    0.55    0.43
   2   8  12    1.00    0.56
   2  -8  10    3.17    0.69
   2   8  10    2.18    0.64
   2  -8   8    1.81    0.53
   2   8   8    1.54    0.60
   2  -8   6    2.90    0.66
   2   8   6    3.61    0.76
   2  -8   4    3.91    0.69
   2   8   4    2.31    0.64
  -2   8  -4    4.46    0.75
   2  -8   2    2.96    0.60
   2   8   2    2.98    0.71
  -2   8  -2    3.71    0.71
   2  -8   0    3.78    0.65
  -2  -8   0    5.26    0.76
  -2   8   0    2.71    0.66
   2   8   0    3.74    0.75
  -2  -8   2    4.57    0.74
   2  -8  -2    6.39    0.83
  -2   8   2    6.12    0.92
   2   8  -2    5.54    0.86
   2  -8  -4    3.94    0.65
  -2  -8   4    3.09    0.62
  -2   8   4    4.02    0.77
  -2  -8   6    6.51    0.89
  -2   8   6    7.01    1.00
  -2  -8   8    4.09    0.72
  -2   8   8    3.17    0.74
  -2  -8  10    0.59    0.43
  -2   8  10    1.07    0.53
  -2  -8  12    2.78    0.65
  -2   8  12    2.07    0.62
  -2  -8  14    0.61    0.47
  -2   8  14    0.05    0.45
  -2   8  16    0.23    0.44
   2   9   5    0.68    0.54
   2   9   3   -0.14    0.44
   2  -9   1    0.51    0.43
  -2   9  -1    0.77    0.54
   2   9   1    0.07    0.47
   2  -9  -1    0.20    0.39
  -2   9   1   -0.47    0.43
   2   9  -1   -0.16    0.47
  -2   9   3   -0.31    0.47
  -2   9   5    0.41    0.57
   3   0  35    3.45    0.77
   3   0  33   19.11    1.54
   3   0  31   15.50    1.34
   3   0  29   10.55    1.14
   3   0  27    5.54    0.82
   3   0  25    8.64    0.95
   3   0  23    8.25    0.90
   3   0  21    0.13    0.26
   3   0  19   22.95    1.18
   3   0  19   21.21    1.34
   3   0  17    5.47    0.61
   3   0  17    5.15    0.43
   3   0  15    0.15    0.13
   3   0  15   -0.03    0.15
   3   0  13   14.11    0.74
   3   0  13   12.86    0.83
   3   0  11   13.43    0.70
   3   0  11   14.10    0.82
   3   0   9   34.21    1.53
   3   0   9   34.77    1.65
   3   0   7   11.81    0.58
   3   0   7   12.57    0.67
   3   0   5   73.14    3.11
   3   0   5   74.79    3.23
   3   0   3   40.53    1.77
   3   0   3   39.01    1.69
   3   0   1   27.01    1.17
   3   0  -1   57.39    2.44
   3   0  -5   40.55    1.77
  -3   0   5   39.50    1.79
  -3   0   7   16.61    0.84
   3   0  -7   16.44    0.83
  -3   0   9    0.20    0.12
   3   0  -9   -0.08    0.08
  -3   0  11    4.65    0.31
  -3   0  11    4.66    0.39
   3   0 -11    4.44    0.38
   3   0 -13    1.36    0.25
  -3   0  13    1.26    0.18
  -3   0  13    1.78    0.30
   3   0 -15   10.59    0.69
  -3   0  15   10.35    0.74
  -3   0  15   10.79    0.59
   3   0 -17    3.95    0.43
  -3   0  17    3.42    0.46
  -3   0  19    0.45    0.24
   3   0 -19    0.36    0.21
   3   0 -21    0.52    0.23
  -3   0  21    0.26    0.28
  -3   0  23    9.12    0.92
   3   0 -23    9.35    0.72
  -3   0  25    7.32    0.84
   3   0 -25    7.97    0.75
   3   0 -27   -0.49    0.21
  -3   0  27    0.12    0.32
  -3   0  29    0.65    0.38
  -3   0  31   -0.02    0.36
  -3   0  33    0.02    0.40
  -3   0  35    0.83    0.52
   3  -1  34    0.45    0.45
   3   1  34    0.27    0.51
   3  -1  32    0.21    0.43
   3   1  32    0.15    0.41
   3  -1  30    0.27    0.41
   3   1  30   -0.21    0.40
   3  -1  28    1.00    0.47
   3   1  28    1.06    0.49
   3  -1  26    1.22    0.46
   3   1  26    1.38    0.48
   3  -1  24    5.46    0.73
   3   1  24    4.10    0.65
   3  -1  22    1.85    0.37
   3  -1  22    1.75    0.45
   3   1  22    1.29    0.39
   3  -1  20   52.65    2.66
   3  -1  20   54.70    2.50
   3   1  20   51.33    2.58
   3   1  20   49.25    2.63
   3  -1  18   42.16    2.20
   3  -1  18   45.35    2.08
   3   1  18   41.04    2.19
   3   1  18   41.74    2.15
   3  -1  16   43.67    2.22
   3  -1  16   44.07    2.09
  -3  -1 -16   41.61    1.96
   3   1  16   46.35    2.23
   3   1  16   45.53    2.20
   3  -1  14   56.24    2.76
  -3  -1 -14   54.94    2.52
   3  -1  14   56.80    2.64
   3   1  14   61.83    2.81
   3   1  14   63.08    2.78
   3  -1  12   70.58    3.23
  -3  -1 -12   70.23    3.00
   3  -1  12   69.85    3.11
   3   1  12   70.90    3.23
   3  -1  10   89.02    3.91
  -3  -1 -10   90.86    3.79
   3  -1  10   91.02    4.02
   3   1  10   90.26    4.01
  -3  -1  -8   39.19    1.67
   3  -1   8   40.72    1.80
   3  -1   8   41.61    1.86
   3   1   8   37.28    1.84
   3  -1   6  161.75    6.69
   3  -1   6  157.86    6.59
   3   1   6  149.32    6.69
   3  -1   4   31.58    1.40
   3  -1   4   31.92    1.41
   3   1   4   29.12    1.41
   3  -1   2   80.76    3.42
  -3  -1  -2   80.96    3.36
   3   1   2   78.44    3.45
   3  -1   0  124.44    5.22
  -3  -1   0  120.60    5.20
   3   1   0  126.45    5.27
   3  -1  -2  117.06    4.90
  -3  -1   2  114.57    4.90
  -3  -1   4    6.57    0.42
  -3  -1   6   17.01    0.88
  -3  -1   6   17.34    0.91
   3  -1  -6   19.14    0.88
  -3   1   6   17.04    0.86
  -3   1   6   17.87    0.92
   3  -1  -8    8.51    0.50
  -3  -1   8    9.53    0.56
  -3  -1   8    9.27    0.54
  -3   1   8    7.84    0.51
  -3   1   8    7.74    0.50
  -3  -1  10   16.15    0.92
   3  -1 -10   16.10    0.85
  -3  -1  10   16.33    0.90
  -3   1  10   17.66    0.90
  -3   1  10   17.10    0.90
   3  -1 -12   13.46    0.78
  -3  -1  12   15.26    0.86
  -3  -1  12   13.15    0.84
  -3   1  12   14.73    0.85
  -3   1  12   15.29    0.82
   3  -1 -14    9.06    0.60
  -3  -1  14    9.55    0.67
  -3  -1  14    9.81    0.67
  -3   1  14    8.28    0.64
  -3   1  14    8.63    0.58
  -3  -1  16    1.50    0.32
  -3  -1  16    0.27    0.19
   3  -1 -16    0.72    0.22
  -3   1  16    0.99    0.28
  -3   1  16    1.09    0.22
  -3  -1  18    2.03    0.37
  -3  -1  18    2.44    0.42
   3  -1 -18    2.15    0.34
  -3   1  18    2.66    0.44
  -3   1  18    3.18    0.37
   3  -1 -20    3.25    0.45
  -3  -1  20    4.23    0.57
   3   1 -20    3.94    0.49
  -3   1  20    4.22    0.57
   3  -1 -22    2.39    0.41
  -3  -1  22    2.41    0.47
   3   1 -22    2.57    0.44
  -3   1  22    3.02    0.53
  -3  -1  24    4.98    0.68
   3  -1 -24    5.40    0.59
   3   1 -24    4.87    0.59
  -3   1  24    3.89    0.62
  -3  -1  26    3.11    0.57
  -3   1  26    2.61    0.53
   3   1 -26    3.92    0.54
  -3  -1  28    1.53    0.50
   3   1 -28    2.95    0.52
  -3   1  28    1.96    0.50
  -3  -1  30    2.72    0.60
  -3   1  30    0.88    0.43
  -3  -1  32    0.64    0.47
  -3   1  32    0.17    0.40
  -3  -1  34    0.99    0.51
  -3   1  34    0.82    0.47
  -3  -1  36    0.75    0.49
  -3   1  36    0.71    0.54
   3  -2  33    4.71    0.86
   3   2  33    5.04    0.88
   3  -2  31    6.30    0.95
   3   2  31    9.18    1.10
   3  -2  29   15.34    1.31
   3   2  29   15.18    1.28
   3  -2  27   15.52    1.23
   3   2  27   12.74    1.12
   3  -2  25    7.07    0.89
   3   2  25    8.41    0.92
   3  -2  23   11.86    0.99
   3  -2  23   13.01    0.95
   3   2  23   13.01    1.03
   3  -2  21    4.92    0.65
   3  -2  21    4.18    0.56
   3   2  21    5.53    0.68
   3   2  21    5.71    0.65
   3  -2  19    0.12    0.26
   3  -2  19    0.08    0.18
   3   2  19    0.46    0.29
   3   2  19    0.19    0.22
   3  -2  17    0.16    0.23
   3  -2  17   -0.09    0.15
   3   2  17   -0.15    0.18
   3   2  17    0.04    0.19
   3  -2  15    0.26    0.19
   3  -2  15    0.54    0.25
   3   2  15    0.44    0.23
   3   2  15    0.27    0.20
   3  -2  13   13.45    0.80
  -3  -2 -13   12.84    0.59
   3  -2  13   12.71    0.77
   3   2  13   10.68    0.76
   3   2  13   10.31    0.79
   3  -2  11    5.92    0.50
  -3  -2 -11    6.24    0.34
   3  -2  11    6.33    0.50
   3   2  11    7.29    0.52
   3   2  11    7.00    0.55
   3  -2   9   42.24    2.08
   3  -2   9   43.54    2.10
  -3  -2  -9   43.54    1.91
   3   2   9   48.98    2.26
   3   2   9   47.55    2.11
   3  -2   7    6.23    0.43
   3  -2   7    6.57    0.46
  -3  -2  -7    5.49    0.33
   3   2   7    8.53    0.54
   3   2   7    8.15    0.46
   3  -2   5   25.44    1.21
  -3  -2  -5   25.10    1.14
   3   2   5   26.25    1.36
   3   2   5   26.95    1.23
  -3  -2  -3   47.13    2.06
   3  -2   3   45.20    2.14
   3   2   3   49.40    2.30
   3   2   3   48.69    2.11
  -3  -2  -1   54.08    2.50
   3  -2   1   57.15    2.56
  -3   2  -1   59.20    2.69
   3   2   1   60.38    2.53
   3  -2  -1   39.98    1.85
  -3  -2   1   41.01    1.83
  -3   2   1   41.57    1.96
   3  -2  -3   30.25    1.43
  -3  -2   3   30.38    1.43
  -3   2   3   31.35    1.53
   3   2  -3   29.92    1.48
  -3  -2   5   69.07    3.07
   3  -2  -5   71.34    3.04
   3   2  -5   69.68    3.16
  -3   2   5   67.21    3.23
  -3  -2   7   12.34    0.70
   3  -2  -7   11.96    0.65
  -3   2   7   10.43    0.60
  -3   2   7   11.64    0.71
  -3  -2   9   10.65    0.70
  -3  -2   9   10.27    0.65
   3  -2  -9   10.49    0.64
  -3   2   9   12.83    0.64
  -3   2   9   11.03    0.71
   3  -2 -11    7.00    0.46
  -3  -2  11    7.08    0.52
  -3  -2  11    6.72    0.53
  -3   2  11    6.10    0.48
  -3   2  11    5.77    0.51
  -3  -2  13    0.58    0.21
  -3  -2  13    0.73    0.24
   3  -2 -13    0.43    0.17
  -3   2  13    0.64    0.21
  -3   2  13    0.64    0.20
  -3  -2  15    3.57    0.46
   3  -2 -15    3.21    0.38
  -3  -2  15    3.02    0.43
  -3   2  15    2.90    0.40
  -3   2  15    3.30    0.41
  -3  -2  17    8.63    0.71
  -3  -2  17    8.32    0.68
   3  -2 -17    7.83    0.59
  -3   2  17    7.75    0.65
  -3   2  17    8.24    0.66
  -3  -2  19    0.47    0.26
  -3  -2  19    0.59    0.27
   3  -2 -19    0.55    0.23
  -3   2  19    0.90    0.31
  -3   2  19    0.55    0.24
  -3  -2  21    1.52    0.40
  -3  -2  21    2.27    0.46
   3  -2 -21    1.43    0.32
  -3   2  21    1.84    0.42
  -3   2  21    2.24    0.39
  -3  -2  23    1.93    0.45
  -3  -2  23    2.57    0.52
  -3   2  23    1.41    0.41
  -3  -2  25    0.57    0.34
  -3  -2  25    0.74    0.40
  -3   2  25    0.18    0.32
  -3  -2  27    0.72    0.40
  -3   2  27    0.76    0.40
   3   2 -27    0.55    0.32
  -3  -2  29    0.46    0.39
   3   2 -29    0.46    0.35
  -3   2  29    1.34    0.49
  -3  -2  31    1.43    0.51
  -3   2  31    1.00    0.46
   3   2 -31    1.04    0.42
  -3  -2  33   -0.13    0.36
  -3   2  33    0.00    0.41
  -3  -2  35    0.70    0.50
  -3   2  35   -0.06    0.45
   3  -3  32    0.29    0.47
   3   3  32    1.02    0.54
   3  -3  30    0.40    0.46
   3   3  30   -0.11    0.36
   3  -3  28    0.67    0.46
   3   3  28    0.26    0.41
   3  -3  26    1.15    0.44
   3  -3  26    0.65    0.37
   3   3  26    1.22    0.45
   3  -3  24    6.94    0.80
   3  -3  24    6.38    0.82
   3   3  24    6.31    0.79
   3   3  24    7.28    0.85
   3  -3  22   11.85    0.97
   3  -3  22   15.34    1.13
   3   3  22   14.36    1.08
   3   3  22   13.37    1.03
   3  -3  20   10.61    0.82
   3  -3  20    9.96    0.84
   3   3  20    8.23    0.86
   3   3  20   10.85    0.89
   3  -3  18   22.62    1.30
   3  -3  18   22.85    1.32
   3   3  18   18.91    1.27
   3   3  18   20.90    1.35
   3  -3  16   45.41    2.22
   3  -3  16   42.91    2.21
   3   3  16   45.74    2.36
   3   3  16   41.56    2.19
   3  -3  14   35.45    1.76
   3  -3  14   33.73    1.75
   3   3  14   32.77    1.72
   3   3  14   32.36    1.85
   3  -3  12   22.21    1.12
   3  -3  12   21.26    1.14
   3   3  12   16.47    1.16
   3   3  12   17.59    1.06
   3  -3  10   54.43    2.41
   3  -3  10   50.60    2.34
  -3  -3 -10   51.83    2.18
   3   3  10   45.27    2.51
   3   3  10   46.97    2.32
   3  -3   8   31.54    1.56
  -3  -3  -8   30.56    1.38
   3  -3   8   30.41    1.48
   3   3   8   29.72    1.66
   3   3   8   30.55    1.48
  -3  -3  -6    3.11    0.26
   3  -3   6    3.77    0.33
   3  -3   6    2.72    0.36
   3   3   6    2.41    0.38
   3   3   6    2.61    0.30
   3  -3   4    2.05    0.20
   3  -3   4    1.48    0.26
  -3  -3  -4    1.80    0.21
  -3   3  -4    1.18    0.23
   3   3   4    0.75    0.23
   3   3   4    1.04    0.18
  -3  -3  -2    3.36    0.33
   3  -3   2    3.75    0.40
   3   3   2    4.60    0.30
   3   3   2    4.22    0.45
  -3   3  -2    4.81    0.45
   3  -3   0   47.45    2.22
  -3  -3   0   47.77    2.18
   3   3   0   47.71    2.13
   3   3   0   48.88    2.36
  -3   3   0   49.19    2.36
  -3  -3   2   37.09    1.72
   3  -3  -2   36.07    1.72
   3   3  -2   35.57    1.81
  -3   3   2   35.98    1.83
   3  -3  -4   22.60    1.09
  -3  -3   4   20.42    1.09
  -3   3   4   19.95    1.16
   3   3  -4   20.81    1.12
   3  -3  -6    2.82    0.33
  -3  -3   6    3.09    0.37
  -3   3   6    2.64    0.37
   3   3  -6    2.45    0.30
  -3  -3   8    0.28    0.17
   3  -3  -8    0.46    0.16
   3   3  -8    0.15    0.12
  -3   3   8    0.41    0.13
  -3   3   8    0.05    0.16
  -3  -3  10   11.94    0.82
   3  -3 -10   11.96    0.74
  -3   3  10   13.40    0.88
   3   3 -10   12.60    0.69
  -3   3  10   13.06    0.71
  -3  -3  12    2.29    0.35
   3  -3 -12    2.74    0.34
  -3  -3  12    2.90    0.42
  -3   3  12    2.42    0.40
  -3   3  12    2.70    0.34
   3  -3 -14    1.95    0.31
  -3  -3  14    2.55    0.39
  -3  -3  14    1.51    0.35
  -3   3  14    2.60    0.42
  -3   3  14    2.64    0.37
  -3  -3  16    0.47    0.27
   3  -3 -16    0.26    0.19
  -3  -3  16    0.20    0.23
  -3   3  16    0.23    0.21
  -3   3  16    0.41    0.23
   3  -3 -18    0.68    0.24
  -3  -3  18    0.20    0.27
  -3  -3  18    0.10    0.25
  -3   3  18   -0.03    0.20
  -3   3  18    0.39    0.26
  -3  -3  20    0.27    0.26
  -3  -3  20    0.16    0.28
  -3   3  20    0.32    0.28
  -3   3  20    0.31    0.27
  -3  -3  22    5.29    0.69
  -3  -3  22    5.81    0.74
  -3   3  22    5.92    0.70
  -3   3  22    7.42    0.77
  -3  -3  24    2.49    0.51
  -3  -3  24    2.01    0.49
  -3   3  24    2.41    0.53
  -3  -3  26    0.72    0.40
  -3  -3  26    0.33    0.34
  -3   3  26   -0.16    0.31
  -3  -3  28    0.10    0.33
  -3  -3  28    0.05    0.32
  -3   3  28   -0.08    0.34
  -3  -3  30    0.79    0.43
  -3  -3  30    0.60    0.40
  -3   3  30    0.36    0.44
  -3  -3  32    0.29    0.45
   3   3 -32   -0.01    0.32
  -3   3  32    0.35    0.45
  -3  -3  34    0.18    0.42
  -3   3  34    0.10    0.45
   3  -4  31    7.64    1.01
   3  -4  29    5.29    0.81
   3   4  29    5.79    0.87
   3  -4  27    4.65    0.75
   3  -4  27    5.79    0.82
   3  -4  25    8.21    0.93
   3  -4  25    7.75    0.92
   3   4  25    7.63    0.94
   3   4  25    7.06    0.89
   3  -4  23    7.39    0.85
   3  -4  23    7.33    0.85
   3   4  23    6.23    0.84
   3   4  23    6.05    0.78
   3  -4  21    1.58    0.44
   3  -4  21    1.02    0.39
   3   4  21    2.14    0.47
   3   4  21    2.50    0.53
   3  -4  19    3.75    0.55
   3  -4  19    3.20    0.54
   3   4  19    3.56    0.54
   3   4  19    2.79    0.55
   3  -4  17    0.04    0.24
   3  -4  17   -0.03    0.23
   3   4  17    0.13    0.24
   3   4  17    0.45    0.30
   3  -4  15    0.14    0.23
   3  -4  15   -0.07    0.21
   3   4  15    0.23    0.29
   3   4  15    0.05    0.22
   3  -4  13    2.98    0.42
   3  -4  13    2.40    0.44
   3   4  13    5.23    0.67
   3   4  13    3.87    0.45
   3  -4  11   17.34    1.00
   3  -4  11   17.61    1.12
   3   4  11   18.92    1.22
   3   4  11   17.57    1.01
   3  -4   9   11.30    0.82
   3  -4   9   10.93    0.69
   3   4   9   12.43    0.91
   3   4   9   12.26    0.72
   3  -4   7   17.96    1.07
  -3  -4  -7   16.77    0.92
  -3   4  -7   19.43    1.05
   3   4   7   18.13    0.94
   3   4   7   15.76    1.12
  -3  -4  -5   24.16    1.29
   3  -4   5   24.71    1.40
   3   4   5   29.19    1.28
  -3   4  -5   26.79    1.42
   3   4   5   25.93    1.52
  -3  -4  -3   14.57    0.84
   3  -4   3   14.31    0.91
   3   4   3   15.18    0.99
  -3   4  -3   14.25    0.92
   3   4   3   15.61    0.77
   3  -4   1   18.49    1.08
  -3  -4  -1   17.48    1.03
  -3   4  -1   18.86    1.14
   3   4   1   20.47    0.94
   3   4   1   19.73    1.17
   3  -4  -1   16.38    0.94
  -3  -4   1   16.02    0.91
  -3   4   1   15.74    0.99
   3   4  -1   15.90    0.79
   3   4  -1   14.62    0.97
   3  -4  -3   34.90    1.82
  -3  -4   3   36.19    1.84
  -3   4   3   39.57    1.98
   3   4  -3   39.49    1.96
  -3  -4   5   12.41    0.86
   3  -4  -5   14.78    0.87
   3   4  -5   15.05    0.90
  -3   4   5   15.34    0.97
  -3  -4   7    4.57    0.53
   3  -4  -7    4.74    0.49
  -3   4   7    5.57    0.61
   3   4  -7    6.44    0.50
  -3  -4   9    6.15    0.64
   3  -4  -9    6.69    0.53
   3   4  -9    6.64    0.50
  -3   4   9    6.15    0.68
   3  -4 -11    0.77    0.24
  -3  -4  11    0.55    0.25
  -3   4  11    0.52    0.27
   3  -4 -13    6.07    0.50
  -3  -4  13    5.41    0.64
  -3   4  13    5.53    0.66
  -3  -4  15    1.73    0.40
   3  -4 -15    1.91    0.33
  -3  -4  15    1.96    0.37
  -3   4  15    1.07    0.35
  -3  -4  17    1.00    0.32
  -3  -4  17    1.03    0.35
   3  -4 -17    1.20    0.30
  -3   4  17    1.42    0.40
  -3  -4  19    0.22    0.31
  -3  -4  19   -0.11    0.23
  -3   4  19    0.09    0.26
  -3  -4  21    1.70    0.46
  -3  -4  21    1.27    0.41
  -3   4  21    0.92    0.40
  -3  -4  23    1.01    0.39
  -3  -4  23    0.38    0.33
  -3   4  23    0.12    0.28
  -3  -4  25   -0.23    0.30
  -3  -4  25    0.29    0.37
  -3   4  25    0.22    0.36
  -3  -4  27    0.92    0.46
  -3  -4  27    1.06    0.45
  -3  -4  29   -0.23    0.32
  -3  -4  29   -0.13    0.38
  -3  -4  31    0.14    0.42
  -3  -4  31    0.03    0.42
   3  -5  28   -0.22    0.43
   3  -5  26    0.69    0.46
   3   5  26    0.85    0.52
   3  -5  24    4.77    0.79
   3   5  24    4.83    0.83
   3  -5  22    3.02    0.62
   3   5  22    2.72    0.64
   3  -5  20    9.57    1.01
   3   5  20    9.81    1.11
   3  -5  18    6.83    0.83
   3   5  18    6.06    0.84
   3  -5  16   10.59    1.02
   3   5  16   10.16    1.08
   3  -5  14   13.38    1.01
   3   5  14   12.30    1.08
   3  -5  12    3.64    0.56
   3   5  12    2.79    0.54
   3  -5  10   19.30    1.27
   3   5  10   20.59    1.39
   3  -5   8   11.11    0.85
   3   5   8   10.26    0.90
  -3   5  -8   10.86    0.81
  -3  -5  -6    0.97    0.26
   3  -5   6    0.80    0.30
  -3   5  -6    1.45    0.33
   3   5   6    0.88    0.33
   3  -5   4    7.40    0.74
  -3  -5  -4    7.97    0.62
  -3   5  -4    8.30    0.70
   3   5   4    9.22    0.77
  -3  -5  -2    2.86    0.41
   3  -5   2    3.03    0.46
   3   5   2    3.15    0.50
  -3   5  -2    3.15    0.48
   3  -5   0    2.06    0.38
  -3  -5   0    1.76    0.33
  -3   5   0    1.49    0.37
   3   5   0    2.35    0.43
  -3  -5   2    6.43    0.63
   3  -5  -2    6.51    0.64
   3   5  -2    6.92    0.71
  -3   5   2    7.30    0.75
  -3  -5   4    0.11    0.19
   3  -5  -4    0.03    0.18
  -3   5   4   -0.02    0.18
   3   5  -4    0.09    0.20
  -3  -5   6    3.37    0.50
   3  -5  -6    4.81    0.52
   3   5  -6    3.72    0.49
  -3   5   6    3.81    0.56
  -3  -5   8    2.13    0.43
   3  -5  -8    2.67    0.40
   3   5  -8    2.19    0.38
  -3   5   8    2.68    0.51
   3  -5 -10    6.55    0.63
  -3  -5  10    5.96    0.69
  -3   5  10    5.20    0.69
  -3  -5  12    1.45    0.38
   3  -5 -12    0.79    0.28
  -3   5  12    0.26    0.30
   3  -5 -14    3.66    0.47
  -3  -5  14    3.39    0.57
  -3   5  14    3.71    0.62
  -3  -5  16   12.80    1.01
  -3   5  16   12.20    1.03
  -3  -5  18    1.48    0.45
  -3   5  18    1.38    0.44
  -3  -5  20    1.47    0.46
  -3   5  20    1.57    0.45
  -3  -5  22    1.59    0.50
  -3   5  22    1.70    0.49
  -3  -5  24    0.64    0.43
  -3   5  24    0.28    0.36
  -3  -5  26    0.78    0.49
  -3   5  26    0.38    0.40
  -3  -5  28    0.16    0.44
   3   6  25    1.38    0.61
   3  -6  23    2.23    0.62
   3   6  23    2.14    0.65
   3  -6  21    1.20    0.50
   3   6  21   -0.09    0.41
   3  -6  19    2.56    0.62
   3   6  19    2.93    0.69
   3  -6  17    0.62    0.37
   3   6  17    1.33    0.54
   3  -6  15   -0.07    0.28
   3   6  15   -0.20    0.30
   3  -6  13    0.04    0.29
   3   6  13    0.09    0.31
   3  -6  11    1.36    0.42
   3   6  11    1.36    0.48
   3  -6   9    4.12    0.63
   3   6   9    4.22    0.71
   3  -6   7    3.25    0.56
   3   6   7    2.62    0.58
  -3   6  -7    2.18    0.46
   3  -6   5   20.49    1.35
  -3   6  -5   22.22    1.37
   3   6   5   21.12    1.48
   3  -6   3    9.40    0.91
  -3  -6  -3    8.90    0.75
   3   6   3    8.92    0.96
  -3   6  -3   10.73    0.87
   3  -6   1    8.74    0.90
  -3  -6  -1    9.78    0.80
  -3   6  -1   11.58    0.94
   3   6   1   11.38    0.94
   3  -6  -1    7.42    0.81
  -3  -6   1    9.33    0.79
   3   6  -1   10.39    0.86
  -3   6   1   11.01    0.90
   3  -6  -3    5.23    0.65
  -3  -6   3    6.69    0.73
   3   6  -3    6.44    0.74
  -3   6   3    5.46    0.74
   3  -6  -5    1.83    0.41
  -3  -6   5    2.73    0.49
   3   6  -5    2.93    0.49
  -3   6   5    2.06    0.48
   3  -6  -7    0.19    0.26
  -3  -6   7    0.57    0.33
   3   6  -7    0.57    0.28
  -3   6   7    1.16    0.42
   3  -6  -9    2.99    0.48
  -3  -6   9    2.51    0.49
  -3   6   9    1.85    0.48
   3  -6 -11    1.16    0.33
  -3  -6  11    1.84    0.47
  -3   6  11    1.17    0.43
  -3  -6  13    2.07    0.47
  -3   6  13    1.66    0.48
  -3  -6  15    2.90    0.57
  -3   6  15    1.68    0.50
  -3  -6  17    0.43    0.39
  -3   6  17    0.64    0.41
  -3  -6  19    0.20    0.34
  -3   6  19    0.38    0.36
  -3  -6  21    0.46    0.41
  -3   6  21    0.01    0.36
  -3  -6  23    0.45    0.44
  -3   6  23    0.22    0.37
  -3  -6  25    0.23    0.43
  -3   6  25    0.27    0.40
  -3   6  27    0.46    0.50
   3   7  22    0.76    0.55
   3   7  20    1.51    0.63
   3  -7  18    2.67    0.66
   3   7  18    4.20    0.84
   3  -7  16    2.13    0.60
   3   7  16    1.38    0.57
   3  -7  14    5.85    0.84
   3   7  14    4.78    0.86
   3  -7  12    2.30    0.59
   3   7  12    3.71    0.78
   3  -7  10    2.40    0.56
   3   7  10    2.43    0.66
   3  -7   8    1.80    0.49
   3   7   8    1.80    0.55
   3  -7   6    3.42    0.62
   3   7   6    2.49    0.63
  -3   7  -6    1.56    0.48
   3  -7   4    0.62    0.37
   3   7   4    0.65    0.42
  -3   7  -4    0.44    0.37
   3  -7   2    0.86    0.38
   3   7   2    0.68    0.39
  -3   7  -2    0.29    0.36
   3  -7   0   -0.13    0.28
  -3  -7   0   -0.10    0.27
   3   7   0    0.48    0.35
  -3   7   0    0.06    0.32
   3  -7  -2    0.35    0.30
  -3  -7   2    0.58    0.33
   3   7  -2    0.16    0.30
  -3   7   2   -0.06    0.33
  -3  -7   4    0.74    0.36
   3  -7  -4    0.24    0.30
  -3   7   4    0.75    0.40
   3   7  -4    0.75    0.37
  -3  -7   6   -0.06    0.31
   3  -7  -6    0.24    0.29
  -3   7   6    0.03    0.36
  -3  -7   8    0.30    0.33
   3  -7  -8    0.59    0.31
  -3   7   8    0.30    0.41
  -3  -7  10    0.31    0.36
  -3   7  10    0.69    0.45
  -3  -7  12    0.87    0.43
  -3   7  12    0.47    0.44
  -3  -7  14    0.24    0.39
  -3   7  14   -0.03    0.33
  -3  -7  16    0.77    0.44
  -3   7  16    0.70    0.44
  -3  -7  18    0.17    0.42
  -3   7  18   -0.23    0.36
  -3  -7  20    0.13    0.40
  -3   7  20    0.08    0.43
  -3   7  22    0.47    0.50
   3   8  15    0.02    0.46
   3   8  13    0.64    0.55
   3  -8  11    0.39    0.44
   3   8  11   -0.27    0.42
   3  -8   9    2.07    0.58
   3   8   9    1.72    0.63
   3  -8   7    1.12    0.47
   3   8   7    0.90    0.53
   3  -8   5    0.91    0.44
   3   8   5    1.25    0.55
   3  -8   3    1.53    0.53
  -3   8  -3    1.07    0.51
   3   8   3    1.67    0.56
   3  -8   1    1.67    0.51
  -3   8  -1    1.75    0.59
   3   8   1    2.19    0.60
   3  -8  -1    1.33    0.46
  -3   8   1    1.24    0.50
   3   8  -1    0.97    0.51
   3  -8  -3    1.91    0.51
  -3  -8   3    1.15    0.45
   3   8  -3    1.17    0.53
  -3   8   3    0.61    0.51
  -3  -8   5    0.98    0.44
   3  -8  -5    0.95    0.41
  -3   8   5    1.05    0.51
  -3  -8   7    0.85    0.46
  -3   8   7    0.41    0.46
  -3  -8   9    0.31    0.41
  -3   8   9    0.49    0.51
  -3  -8  11    0.31    0.40
  -3   8  11    0.04    0.44
  -3  -8  13    0.11    0.40
  -3   8  13    0.49    0.48
  -3   8  15    0.71    0.53
  -3   8  17    0.07    0.46
   3   9   4    0.42    0.55
   3   9   2    0.02    0.48
  -3   9   0   -0.08    0.46
   3   9   0   -0.10    0.47
   3  -9  -2    0.41    0.47
  -3   9   2   -0.08    0.45
  -3   9   4   -0.31    0.46
  -3   9   6    0.92    0.56
   4   0  34   -0.26    0.41
   4   0  32    0.10    0.50
   4   0  30    1.51    0.56
   4   0  28   -0.12    0.37
   4   0  26    2.69    0.58
   4   0  24    3.30    0.59
   4   0  22    0.09    0.26
   4   0  20    0.71    0.30
   4   0  18   12.32    0.92
   4   0  18   13.27    0.77
   4   0  16    0.30    0.21
   4   0  16    0.42    0.17
   4   0  14    2.59    0.29
   4   0  14    3.03    0.42
   4   0  12   66.69    3.01
   4   0  12   63.45    2.82
   4   0  10   26.10    1.35
   4   0  10   27.34    1.22
   4   0   8   11.85    0.68
   4   0   8   11.41    0.57
   4   0   6    5.90    0.42
   4   0   6    6.79    0.35
   4   0   4   45.32    2.05
   4   0   4   46.41    1.96
   4   0   2   21.67    0.93
   4   0   2   19.91    0.98
   4   0   0   50.88    2.18
   4   0   0   50.60    2.22
   4   0  -2  976.91   40.59
   4   0  -4  241.86   10.12
   4   0  -6  101.91    4.36
  -4   0   8    5.55    0.39
   4   0  -8    5.34    0.39
   4   0 -10   28.28    1.34
  -4   0  10   26.83    1.35
   4   0 -12   10.16    0.64
  -4   0  12   10.26    0.66
  -4   0  14   27.24    1.45
   4   0 -14   28.52    1.41
   4   0 -16    0.42    0.19
  -4   0  16    0.08    0.19
   4   0 -18    2.73    0.39
  -4   0  18    2.15    0.39
  -4   0  20    1.44    0.37
   4   0 -20    1.79    0.36
  -4   0  22   65.60    3.28
   4   0 -22   68.92    3.16
  -4   0  24   26.51    1.55
   4   0 -24   23.31    1.40
  -4   0  26   12.65    1.02
   4   0 -26   12.03    0.93
   4   0 -28   23.69    1.38
  -4   0  28   19.38    1.44
  -4   0  30   13.76    1.18
  -4   0  32   10.75    1.16
  -4   0  34    7.35    1.00
  -4   0  36    6.41    0.99
   4  -1  33    0.11    0.46
   4   1  33    0.16    0.46
   4  -1  31    1.52    0.56
   4   1  31    1.60    0.56
   4  -1  29    0.09    0.37
   4   1  29    0.31    0.40
   4  -1  27    0.14    0.38
   4   1  27   -0.24    0.34
   4  -1  25    2.15    0.51
   4   1  25    2.58    0.57
   4  -1  23    0.96    0.41
   4   1  23    0.68    0.35
   4  -1  21    3.90    0.59
   4  -1  21    3.75    0.47
   4   1  21    2.97    0.54
   4  -1  19   19.88    1.29
   4  -1  19   18.36    1.12
   4   1  19   21.19    1.22
   4   1  19   23.46    1.34
   4  -1  17   18.07    1.13
   4  -1  17   17.83    1.00
   4   1  17   17.12    1.11
   4   1  17   17.71    1.06
   4  -1  15   41.63    2.11
   4  -1  15   42.40    1.97
   4   1  15   41.14    2.10
   4  -1  13   21.68    1.19
  -4  -1 -13   21.76    0.97
   4  -1  13   20.92    1.08
   4   1  13   19.77    1.16
  -4  -1 -11  169.52    7.05
   4  -1  11  168.17    7.18
   4  -1  11  176.09    7.37
   4   1  11  163.17    7.34
   4  -1   9  140.72    6.11
   4  -1   9  140.37    5.99
   4   1   9  141.21    6.12
   4  -1   7   47.17    2.25
   4  -1   7   50.08    2.31
   4   1   7   56.32    2.35
   4  -1   5   29.55    1.45
   4  -1   5   31.79    1.48
   4   1   5   34.93    1.51
   4  -1   3   33.25    1.55
   4  -1   3   31.86    1.55
   4   1   3   35.98    1.46
   4   1   3   36.58    1.58
   4  -1   1   96.37    4.11
   4   1   1   94.19    4.13
   4   1   1   96.86    4.03
  -4  -1   1  192.33    8.03
   4  -1  -1  190.69    8.04
  -4  -1   3    0.54    0.14
   4  -1  -3    0.63    0.14
   4  -1  -5   40.02    1.88
  -4  -1   5   40.92    1.91
  -4   1   5   45.12    2.00
  -4  -1   7   11.32    0.66
   4  -1  -7   11.69    0.62
  -4   1   7   10.71    0.63
  -4   1   7    9.90    0.59
  -4  -1   9   33.98    1.67
   4  -1  -9   35.75    1.62
  -4  -1   9   34.55    1.65
  -4   1   9   34.81    1.63
  -4   1   9   33.95    1.68
   4  -1 -11   61.35    2.82
  -4  -1  11   60.16    2.88
  -4  -1  11   63.56    2.90
  -4   1  11   65.51    2.88
  -4   1  11   66.10    2.96
  -4  -1  13    7.58    0.58
  -4  -1  13    7.61    0.59
   4  -1 -13    7.89    0.54
   4  -1 -15   65.91    2.87
  -4  -1  15   66.47    2.95
  -4  -1  15   63.43    2.96
  -4   1  15   59.30    2.91
  -4   1  15   59.77    2.96
   4  -1 -17  110.49    4.90
  -4  -1  17  110.36    4.97
  -4  -1  17  109.56    5.03
   4   1 -17  114.53    4.95
  -4   1  17  110.54    5.01
  -4   1  17  112.98    5.11
  -4  -1  19   92.27    4.23
   4  -1 -19   90.67    4.08
  -4   1  19   90.72    4.22
   4   1 -19   92.79    4.13
  -4   1  19   87.80    4.18
  -4  -1  21   32.69    1.77
   4  -1 -21   32.90    1.64
   4   1 -21   30.51    1.66
  -4   1  21   28.34    1.69
  -4  -1  23   48.10    2.61
   4  -1 -23   51.33    2.49
  -4   1  23   51.53    2.62
   4   1 -23   52.68    2.53
   4  -1 -25   28.98    1.65
  -4  -1  25   30.04    1.82
  -4   1  25   33.27    1.83
   4   1 -25   30.47    1.69
  -4  -1  27    5.42    0.78
   4   1 -27    5.58    0.69
  -4   1  27    5.95    0.78
  -4  -1  29    3.57    0.65
   4   1 -29    3.85    0.60
  -4   1  29    5.35    0.77
  -4  -1  31    1.08    0.48
  -4   1  31    0.79    0.47
  -4  -1  33    0.35    0.43
  -4   1  33    0.34    0.44
  -4  -1  35    0.87    0.53
  -4   1  35    0.95    0.52
   4  -2  32   -0.03    0.47
   4   2  32    0.37    0.49
   4  -2  30    0.01    0.44
   4   2  30    0.05    0.40
   4  -2  28    0.55    0.44
   4   2  28    0.28    0.39
   4  -2  26    0.59    0.44
   4   2  26    1.52    0.50
   4  -2  24    2.40    0.56
   4   2  24    2.49    0.54
   4  -2  22    7.83    0.88
   4  -2  22    6.10    0.70
   4   2  22    8.90    0.88
   4   2  22    7.86    0.80
   4  -2  20    1.10    0.34
   4  -2  20    1.35    0.32
   4   2  20    1.18    0.37
   4   2  20    0.84    0.33
   4  -2  18    2.43    0.39
   4  -2  18    1.70    0.41
   4   2  18    0.86    0.34
   4   2  18    1.11    0.32
   4  -2  16    1.91    0.37
   4  -2  16    2.11    0.36
   4   2  16    2.12    0.39
   4   2  16    2.31    0.41
   4  -2  14    3.07    0.40
   4  -2  14    3.57    0.46
   4   2  14    3.37    0.46
   4   2  14    3.78    0.46
   4  -2  12    7.69    0.59
   4  -2  12    8.67    0.58
   4   2  12    7.31    0.57
   4   2  12    8.46    0.63
   4  -2  10    3.40    0.40
   4  -2  10    4.16    0.43
   4   2  10    4.14    0.42
   4  -2   8   19.91    0.97
   4  -2   8   19.30    0.96
   4   2   8   14.44    0.92
   4  -2   6   21.36    1.04
  -4  -2  -6   20.46    0.88
   4  -2   6   20.43    0.99
   4   2   6   16.95    0.98
  -4  -2  -4   12.14    0.60
   4  -2   4   11.64    0.64
   4   2   4   14.50    0.70
   4  -2   2   40.84    1.78
  -4  -2  -2   41.15    1.78
   4  -2   2   40.58    1.86
   4   2   2   38.30    1.82
   4  -2   0  123.89    5.37
  -4  -2   0  127.46    5.33
   4   2   0  124.71    5.38
  -4   2   0  126.02    5.67
   4  -2  -2   78.52    3.33
  -4  -2   2   77.54    3.31
  -4   2   2   71.59    3.50
   4  -2  -4  151.22    6.32
  -4  -2   4  148.81    6.34
  -4   2   4  145.26    6.69
   4  -2  -6  146.07    6.21
  -4  -2   6  144.59    6.25
  -4   2   6  145.97    6.59
  -4  -2   8   51.76    2.44
   4  -2  -8   51.92    2.38
  -4   2   8   53.83    2.55
  -4   2   8   53.26    2.36
   4  -2 -10   99.54    4.31
  -4  -2  10  102.63    4.42
  -4  -2  10  100.11    4.38
  -4   2  10   98.12    4.58
  -4   2  10   95.40    4.32
  -4  -2  12   19.50    1.13
   4  -2 -12   19.33    1.04
  -4  -2  12   19.77    1.10
  -4   2  12   20.02    1.06
  -4   2  12   20.55    1.14
   4  -2 -14    1.35    0.26
  -4  -2  14    1.38    0.31
  -4  -2  14    1.80    0.33
  -4   2  14    1.23    0.27
  -4   2  14    1.21    0.27
  -4  -2  16    9.36    0.74
  -4  -2  16    8.93    0.73
   4  -2 -16    9.19    0.66
  -4   2  16   11.08    0.72
  -4   2  16    9.18    0.69
   4  -2 -18    6.91    0.58
  -4  -2  18    6.62    0.72
  -4  -2  18    7.01    0.70
  -4   2  18    7.32    0.62
  -4   2  18    6.47    0.65
  -4  -2  20   19.94    1.23
  -4  -2  20   18.99    1.23
   4  -2 -20   19.92    1.13
  -4   2  20   18.44    1.15
  -4   2  20   18.82    1.19
   4  -2 -22    3.68    0.50
  -4  -2  22    4.73    0.65
  -4  -2  22    4.92    0.64
  -4   2  22    5.55    0.65
  -4  -2  24    2.90    0.52
  -4  -2  24    2.40    0.53
  -4   2  24    4.06    0.60
  -4  -2  26   10.10    1.02
   4   2 -26    9.71    0.95
  -4   2  26    9.74    0.97
  -4  -2  28    9.04    1.01
   4   2 -28    9.61    0.94
  -4   2  28    7.74    0.92
  -4  -2  30   14.22    1.20
   4   2 -30   14.29    1.10
  -4   2  30   13.91    1.17
  -4  -2  32   11.86    1.22
  -4   2  32   11.00    1.19
   4   2 -32   12.41    1.05
  -4  -2  34    7.00    0.99
  -4   2  34    6.56    0.94
   4  -3  31   -0.11    0.44
   4   3  31   -0.17    0.41
   4  -3  29   -0.06    0.36
   4   3  29    0.40    0.43
   4  -3  27   -0.16    0.36
   4   3  27    0.78    0.44
   4  -3  25    0.44    0.35
   4  -3  25    0.57    0.39
   4   3  25    0.33    0.38
   4  -3  23    1.88    0.50
   4  -3  23    2.20    0.50
   4   3  23    3.26    0.57
   4   3  23    2.78    0.55
   4  -3  21    5.17    0.65
   4  -3  21    5.92    0.73
   4   3  21    4.27    0.65
   4   3  21    5.01    0.66
   4  -3  19    6.99    0.75
   4  -3  19    5.94    0.69
   4   3  19    7.72    0.81
   4   3  19    7.25    0.77
   4  -3  17    3.89    0.54
   4  -3  17    3.60    0.51
   4   3  17    2.85    0.48
   4   3  17    4.07    0.57
   4  -3  15   38.77    1.92
   4  -3  15   36.34    1.91
   4   3  15   36.76    1.92
   4   3  15   36.45    2.04
   4  -3  13   46.71    2.27
   4  -3  13   46.88    2.28
   4   3  13   48.71    2.45
   4   3  13   44.06    2.25
   4  -3  11   17.86    1.01
   4  -3  11   16.87    1.04
   4   3  11   18.87    1.15
   4   3  11   17.40    1.01
  -4  -3  -9   44.76    1.97
   4  -3   9   45.19    2.19
   4  -3   9   44.08    2.12
   4   3   9   45.67    2.14
   4   3   9   47.65    2.37
   4  -3   7   23.73    1.16
  -4  -3  -7   24.14    1.08
   4  -3   7   22.94    1.24
   4   3   7   21.40    1.16
   4   3   7   23.35    1.34
   4  -3   5   18.87    0.92
   4  -3   5   16.25    1.00
  -4  -3  -5   16.85    0.89
   4   3   5   19.91    0.95
   4   3   5   20.12    1.12
  -4  -3  -3   23.97    1.16
   4  -3   3   24.12    1.13
   4  -3   3   23.89    1.26
   4   3   3   25.41    1.18
   4   3   3   24.20    1.35
  -4   3  -3   24.62    1.30
  -4  -3  -1    2.97    0.31
   4  -3   1    2.97    0.35
  -4   3  -1    2.70    0.35
   4   3   1    3.32    0.41
   4   3   1    2.65    0.28
  -4  -3   1   17.44    0.94
   4  -3  -1   17.90    0.98
   4   3  -1   18.20    0.90
  -4   3   1   18.35    1.03
   4   3  -1   17.93    1.04
  -4  -3   3    4.40    0.43
   4  -3  -3    3.71    0.39
  -4   3   3    4.16    0.46
   4   3  -3    4.27    0.43
   4  -3  -5   10.36    0.66
  -4  -3   5   10.00    0.67
  -4   3   5   10.32    0.72
   4   3  -5   10.82    0.66
  -4  -3   7    8.19    0.60
   4  -3  -7    7.23    0.55
   4   3  -7    9.34    0.56
  -4   3   7    8.68    0.66
   4  -3  -9   50.53    2.40
  -4  -3   9   51.79    2.47
  -4   3   9   51.54    2.59
   4   3  -9   51.62    2.43
  -4   3   9   53.93    2.33
  -4  -3  11   62.83    2.98
   4  -3 -11   60.52    2.86
  -4   3  11   65.23    2.84
   4   3 -11   64.29    2.90
  -4   3  11   62.57    3.10
   4  -3 -13   64.77    3.01
  -4  -3  13   63.60    3.13
  -4  -3  13   63.92    3.06
  -4   3  13   69.01    3.27
  -4   3  13   69.88    3.03
  -4  -3  15   51.19    2.59
   4  -3 -15   52.64    2.46
  -4  -3  15   50.80    2.53
  -4   3  15   55.08    2.48
  -4   3  15   51.18    2.65
   4  -3 -17   34.20    1.74
  -4  -3  17   34.84    1.84
  -4  -3  17   32.34    1.87
  -4   3  17   36.19    1.92
  -4   3  17   36.35    1.81
   4  -3 -19   20.33    1.21
  -4  -3  19   23.06    1.35
  -4  -3  19   21.62    1.36
  -4   3  19   19.74    1.24
  -4   3  19   23.37    1.36
  -4  -3  21   49.44    2.76
  -4  -3  21   56.30    2.80
   4  -3 -21   54.16    2.62
  -4   3  21   60.75    2.87
  -4   3  21   54.22    2.73
  -4  -3  23   20.62    1.36
  -4  -3  23   19.38    1.33
  -4   3  23   18.65    1.28
  -4   3  23   20.87    1.30
  -4  -3  25   13.36    1.10
  -4  -3  25   12.32    1.02
  -4   3  25   13.17    1.03
  -4  -3  27    7.14    0.89
  -4  -3  27    7.84    0.94
  -4   3  27    8.64    0.94
  -4  -3  29    3.14    0.66
  -4  -3  29    3.48    0.66
  -4   3  29    3.44    0.67
  -4  -3  31    0.18    0.42
   4   3 -31    0.07    0.36
  -4   3  31   -0.35    0.37
  -4  -3  33   -0.02    0.45
  -4   3  33    0.44    0.45
   4   3 -33    0.54    0.43
   4  -4  30   -0.18    0.43
   4   4  30    1.14    0.56
   4  -4  28    2.89    0.64
   4   4  28    2.70    0.65
   4  -4  26    0.69    0.44
   4  -4  26    0.32    0.40
   4   4  26    0.01    0.40
   4   4  26    0.98    0.45
   4  -4  24    0.15    0.34
   4  -4  24    0.08    0.36
   4   4  24    0.03    0.34
   4   4  24    0.41    0.40
   4  -4  22    0.97    0.40
   4  -4  22    0.65    0.38
   4   4  22    1.55    0.45
   4   4  22    1.52    0.49
   4  -4  20    3.25    0.57
   4  -4  20    4.37    0.65
   4   4  20    5.05    0.72
   4   4  20    4.64    0.64
   4  -4  18    0.23    0.30
   4  -4  18    0.43    0.30
   4   4  18    0.62    0.33
   4   4  18    0.74    0.36
   4  -4  16    6.07    0.65
   4  -4  16    5.09    0.65
   4   4  16    7.92    0.73
   4   4  16    6.59    0.79
   4  -4  14    0.81    0.31
   4  -4  14    0.90    0.30
   4   4  14    0.51    0.27
   4   4  14    0.65    0.31
   4  -4  12    5.70    0.55
   4  -4  12    4.05    0.56
   4   4  12    5.36    0.54
   4   4  12    4.80    0.65
   4  -4  10   14.08    0.96
   4   4  10   14.50    1.03
   4   4  10   13.90    0.85
   4  -4   8    7.47    0.65
   4   4   8    9.03    0.58
   4   4   8    7.87    0.72
   4  -4   6    9.10    0.67
  -4  -4  -6    7.74    0.53
   4   4   6    8.25    0.55
   4   4   6    8.16    0.73
  -4  -4  -4   29.45    1.40
   4  -4   4   28.99    1.51
   4   4   4   27.04    1.35
   4   4   4   26.91    1.61
  -4   4  -4   29.26    1.54
   4  -4   2   43.52    2.05
  -4  -4  -2   41.45    1.95
   4   4   2   40.01    2.17
   4   4   2   40.20    1.89
  -4   4  -2   42.39    2.12
   4  -4   0   62.26    2.88
  -4  -4   0   64.06    2.83
   4   4   0   61.47    2.75
   4   4   0   61.92    3.06
  -4   4   0   59.89    3.02
   4  -4  -2   37.21    1.66
  -4  -4   2   35.57    1.62
   4   4  -2   30.29    1.69
   4   4  -2   29.37    1.49
  -4   4   2   28.11    1.70
   4  -4  -4   14.05    0.87
  -4  -4   4   12.77    0.86
  -4   4   4   15.05    0.97
   4   4  -4   13.73    0.88
   4  -4  -6   64.79    2.99
  -4  -4   6   64.92    3.04
   4   4  -6   68.10    3.14
  -4   4   6   62.39    3.21
   4  -4  -8   62.56    2.83
  -4  -4   8   61.06    2.89
  -4   4   8   61.33    3.05
   4   4  -8   59.28    2.91
  -4  -4  10    5.39    0.63
   4  -4 -10    6.43    0.55
  -4   4  10    6.46    0.70
   4   4 -10    7.32    0.52
  -4  -4  12   13.15    0.91
   4  -4 -12   12.14    0.80
  -4   4  12   10.99    0.90
  -4  -4  14    4.24    0.58
   4  -4 -14    3.69    0.46
  -4   4  14    4.32    0.59
  -4  -4  16    2.36    0.46
   4  -4 -16    2.49    0.39
  -4   4  16    1.52    0.39
  -4  -4  18    5.43    0.70
   4  -4 -18    5.95    0.59
  -4   4  18    4.13    0.62
  -4  -4  20    0.56    0.34
  -4  -4  20    0.20    0.28
  -4   4  20   -0.12    0.26
  -4  -4  22    5.36    0.77
  -4  -4  22    7.78    0.84
  -4   4  22    6.08    0.76
  -4  -4  24    4.38    0.70
  -4  -4  24    4.70    0.70
  -4   4  24    4.61    0.68
  -4  -4  26    9.02    1.00
  -4  -4  26    9.92    1.08
  -4  -4  28   11.93    1.23
  -4  -4  28    9.18    1.06
  -4  -4  30    7.57    1.03
  -4  -4  30    6.51    0.89
  -4  -4  32    7.23    0.99
  -4  -4  32    7.96    1.06
   4  -5  27    0.81    0.48
   4   5  27    0.97    0.54
   4  -5  25   -0.30    0.33
   4   5  25   -0.16    0.39
   4  -5  23    1.47    0.52
   4   5  23    3.12    0.65
   4  -5  21    3.46    0.65
   4   5  21    3.53    0.69
   4  -5  19    4.36    0.70
   4   5  19    3.31    0.66
   4  -5  17    2.21    0.51
   4   5  17    1.14    0.45
   4  -5  15    7.87    0.86
   4   5  15    7.13    0.92
   4  -5  13    0.78    0.35
   4   5  13    2.66    0.56
   4  -5  11    2.86    0.51
   4   5  11    5.60    0.76
   4  -5   9   12.61    0.94
   4   5   9   11.58    0.99
   4  -5   7   19.84    1.25
   4   5   7   20.99    1.40
  -4  -5  -5   24.50    1.27
   4  -5   5   24.34    1.40
   4   5   5   22.94    1.49
  -4   5  -5   22.90    1.39
   4  -5   3    4.91    0.57
  -4  -5  -3    3.97    0.45
   4   5   3    3.08    0.54
  -4   5  -3    3.23    0.50
   4  -5   1    1.25    0.32
  -4  -5  -1    1.56    0.32
   4   5   1    1.21    0.36
  -4   5  -1    1.45    0.35
  -4  -5   1    2.79    0.41
   4  -5  -1    2.57    0.43
   4   5  -1    3.12    0.49
  -4   5   1    3.03    0.50
  -4  -5   3    0.06    0.20
   4  -5  -3    0.30    0.22
  -4   5   3    0.03    0.21
   4   5  -3    0.40    0.24
   4  -5  -5   28.71    1.60
  -4  -5   5   31.33    1.65
   4   5  -5   29.75    1.68
  -4   5   5   31.12    1.77
  -4  -5   7    8.92    0.73
   4  -5  -7    7.54    0.66
  -4   5   7    8.76    0.89
   4   5  -7    8.85    0.69
   4  -5  -9    0.43    0.24
  -4  -5   9    1.23    0.35
   4   5  -9    1.55    0.33
  -4   5   9    2.09    0.46
   4  -5 -11   40.95    2.07
  -4  -5  11   39.44    2.18
  -4   5  11   43.79    2.32
  -4  -5  13   27.73    1.67
   4  -5 -13   30.03    1.55
  -4   5  13   27.47    1.73
   4  -5 -15   18.74    1.10
  -4  -5  15   17.10    1.22
  -4   5  15   16.83    1.25
  -4  -5  17   10.30    1.03
  -4   5  17    9.03    0.97
  -4  -5  19   23.03    1.48
  -4   5  19   18.99    1.42
  -4  -5  21   18.53    1.39
  -4   5  21   19.45    1.38
  -4  -5  23    5.10    0.81
  -4   5  23    7.07    0.89
  -4  -5  25    3.86    0.75
  -4   5  25    4.05    0.71
  -4  -5  27    2.39    0.64
  -4   5  27    2.70    0.64
   4  -6  24    0.78    0.47
   4   6  24    0.52    0.49
   4  -6  22    2.26    0.60
   4   6  22    1.74    0.63
   4  -6  20    1.05    0.49
   4   6  20    0.40    0.41
   4  -6  18    1.12    0.44
   4   6  18    1.19    0.54
   4  -6  16    0.54    0.37
   4   6  16    0.64    0.43
   4  -6  14   -0.13    0.26
   4   6  14    0.02    0.35
   4  -6  12   -0.11    0.24
   4   6  12    0.59    0.41
   4  -6  10    4.08    0.63
   4   6  10    4.19    0.71
   4  -6   8    3.54    0.58
   4   6   8    3.41    0.67
   4  -6   6    9.34    0.91
   4   6   6    7.46    0.92
  -4   6  -6    7.78    0.83
   4  -6   4    4.61    0.62
   4   6   4    3.67    0.64
  -4   6  -4    4.50    0.63
  -4  -6  -2   21.75    1.25
   4  -6   2   19.75    1.28
  -4   6  -2   19.35    1.33
   4   6   2   19.80    1.39
  -4  -6   0   15.80    1.03
   4  -6   0   14.33    1.04
  -4   6   0   15.41    1.14
   4   6   0   14.92    1.14
  -4  -6   2   18.27    1.16
   4  -6  -2   16.33    1.14
  -4   6   2   18.70    1.28
   4   6  -2   17.52    1.23
  -4  -6   4   10.46    0.86
   4  -6  -4   10.69    0.86
  -4   6   4   10.84    1.07
   4   6  -4   10.59    0.88
   4  -6  -6   12.84    0.94
  -4  -6   6   14.13    1.01
  -4   6   6   11.50    1.06
   4   6  -6   13.07    0.97
   4  -6  -8    6.41    0.71
  -4  -6   8    7.09    0.81
  -4   6   8    6.56    0.84
  -4  -6  10    0.16    0.28
   4  -6 -10    0.27    0.27
  -4   6  10   -0.02    0.28
   4  -6 -12    7.25    0.73
  -4  -6  12    6.97    0.83
  -4   6  12    6.57    0.86
  -4  -6  14    8.82    0.97
  -4   6  14    8.62    1.00
  -4  -6  16    4.14    0.69
  -4   6  16    2.99    0.61
  -4  -6  18    0.70    0.40
  -4   6  18    0.72    0.42
  -4  -6  20   -0.02    0.32
  -4   6  20    0.00    0.35
  -4  -6  22    0.77    0.47
  -4   6  22    1.31    0.52
  -4  -6  24    4.67    0.83
  -4   6  24    4.69    0.80
  -4   6  26    5.68    0.88
   4   7  21   -0.08    0.45
   4   7  19    1.52    0.62
   4  -7  17    1.50    0.54
   4   7  17    3.73    0.83
   4  -7  15    0.36    0.43
   4   7  15    1.71    0.60
   4  -7  13    4.48    0.74
   4   7  13    4.85    0.87
   4  -7  11    2.40    0.58
   4   7  11    2.77    0.67
   4  -7   9    2.25    0.54
   4   7   9    2.03    0.57
   4  -7   7   -0.19    0.33
   4   7   7    0.20    0.36
   4  -7   5    3.77    0.63
  -4   7  -5    3.75    0.63
   4   7   5    3.14    0.66
   4  -7   3    1.41    0.43
   4   7   3    1.86    0.53
  -4   7  -3    2.69    0.57
   4  -7   1    0.18    0.29
  -4   7  -1    0.84    0.42
   4   7   1    1.19    0.46
  -4  -7   1    0.91    0.35
   4  -7  -1    0.56    0.32
   4   7  -1    0.39    0.33
  -4   7   1    1.01    0.44
   4  -7  -3    0.42    0.32
  -4  -7   3    0.48    0.30
   4   7  -3    0.44    0.35
  -4   7   3    0.34    0.36
  -4  -7   5    0.68    0.38
   4  -7  -5    0.37    0.30
  -4   7   5    1.11    0.48
   4   7  -5    0.31    0.33
   4  -7  -7    4.59    0.65
  -4  -7   7    4.17    0.67
  -4   7   7    4.84    0.80
   4  -7  -9    1.59    0.43
  -4  -7   9    2.19    0.51
  -4   7   9    1.03    0.49
  -4  -7  11    8.44    0.99
  -4   7  11    6.82    0.98
  -4  -7  13    4.15    0.74
  -4   7  13    5.29    0.86
  -4  -7  15    7.68    0.98
  -4   7  15    6.52    0.95
  -4  -7  17    7.33    1.00
  -4   7  17    7.41    1.02
  -4  -7  19    5.73    0.91
  -4   7  19    7.20    1.02
  -4   7  21    5.50    0.92
  -4   7  23    2.97    0.73
   4   8  14   -0.10    0.49
   4   8  12    0.19    0.46
   4  -8  10    0.14    0.39
   4   8  10    0.17    0.47
   4  -8   8    0.00    0.37
   4   8   8    0.38    0.49
   4  -8   6    2.69    0.63
   4   8   6    1.95    0.63
   4  -8   4    1.74    0.52
  -4   8  -4    1.93    0.60
   4   8   4    2.81    0.69
   4  -8   2    3.32    0.65
   4   8   2    3.70    0.73
  -4   8  -2    3.46    0.71
   4  -8   0    1.77    0.54
  -4   8   0    2.33    0.63
   4   8   0    3.25    0.67
   4  -8  -2    5.43    0.78
   4   8  -2    5.65    0.83
  -4   8   2    4.40    0.80
   4  -8  -4    3.71    0.67
  -4  -8   4    4.97    0.76
  -4   8   4    5.04    0.86
  -4  -8   6    1.64    0.53
   4  -8  -6    1.32    0.46
  -4   8   6    1.12    0.57
  -4  -8   8    3.82    0.71
  -4   8   8    3.70    0.80
  -4  -8  10    3.46    0.70
  -4   8  10    5.07    0.89
  -4  -8  12    0.85    0.49
  -4   8  12   -0.01    0.44
  -4  -8  14   -0.06    0.41
  -4   8  14    0.30    0.44
  -4   8  16    0.04    0.41
   4   9   3    0.39    0.55
  -4   9  -1    0.44    0.52
   4   9   1    0.24    0.54
  -4   9   1   -0.17    0.46
  -4   9   3   -0.43    0.47
   5   0  33    2.90    0.71
   5   0  31   14.01    1.43
   5   0  29   11.44    1.22
   5   0  27   16.99    1.32
   5   0  25   13.67    1.11
   5   0  23    4.41    0.68
   5   0  21   17.58    1.22
   5   0  19    0.91    0.34
   5   0  17    7.88    0.54
   5   0  17    8.66    0.70
   5   0  15    1.67    0.35
   5   0  15    1.86    0.25
   5   0  13   -0.09    0.14
   5   0  13    0.13    0.11
   5   0  11  110.33    4.80
   5   0  11  105.58    4.58
   5   0   9    0.27    0.09
   5   0   9    0.25    0.15
   5   0   7   69.56    3.09
   5   0   7   68.24    2.93
   5   0   5    8.41    0.51
   5   0   5    8.42    0.43
   5   0   3   45.58    2.10
   5   0   3   47.92    2.02
   5   0   1   37.35    1.68
   5   0   1   37.03    1.63
   5   0  -1   26.92    1.22
   5   0  -3  225.24    9.44
   5   0  -5   78.67    3.40
   5   0  -7    0.36    0.13
   5   0  -9   16.26    0.87
   5   0 -11    0.90    0.20
  -5   0  11    0.57    0.18
  -5   0  13    0.10    0.15
   5   0 -13   -0.19    0.11
  -5   0  15   18.32    1.03
   5   0 -15   16.19    0.97
   5   0 -17    6.34    0.59
  -5   0  17    5.68    0.60
   5   0 -19    3.52    0.46
  -5   0  19    4.58    0.55
  -5   0  21    1.95    0.42
   5   0 -21    2.73    0.43
  -5   0  23    2.19    0.46
   5   0 -23    2.20    0.43
   5   0 -25   20.64    1.29
  -5   0  25   22.18    1.42
   5   0 -27    1.84    0.43
  -5   0  27    0.69    0.39
   5   0 -29    0.84    0.38
  -5   0  29    1.23    0.45
  -5   0  31    1.40    0.53
  -5   0  33   -0.19    0.34
  -5   0  35    0.01    0.39
   5  -1  34    2.06    0.67
   5   1  34    1.43    0.63
   5  -1  32    1.00    0.56
   5   1  32    0.27    0.49
   5  -1  30    0.35    0.42
   5   1  30    0.28    0.41
   5  -1  28    1.54    0.53
   5   1  28    0.81    0.46
   5  -1  26    1.67    0.50
   5   1  26    2.58    0.59
   5  -1  24    4.97    0.72
   5   1  24    4.71    0.71
   5  -1  22   13.46    1.04
   5   1  22   13.68    1.08
   5  -1  20    1.44    0.41
   5   1  20    1.94    0.44
   5   1  20    3.23    0.46
   5  -1  18   41.47    2.18
   5  -1  18   41.27    2.00
   5   1  18   42.09    2.18
   5  -1  16   82.20    3.66
   5  -1  16   84.15    3.86
   5   1  16   80.98    3.85
   5  -1  14   76.17    3.32
   5  -1  14   74.76    3.47
   5   1  14   72.62    3.46
  -5  -1 -12   92.72    3.96
   5  -1  12   97.21    4.27
   5  -1  12   94.96    4.12
   5   1  12   94.13    4.26
   5  -1  10  169.86    7.31
   5  -1  10  164.82    7.14
   5   1  10  170.71    7.31
   5  -1   8  119.44    5.07
   5  -1   8  119.99    5.18
   5   1   8  116.34    5.19
   5  -1   6   29.28    1.38
   5  -1   6   26.14    1.31
   5   1   6   30.16    1.38
   5  -1   4   37.29    1.64
   5  -1   4   36.15    1.66
   5   1   4   35.94    1.53
   5   1   4   35.07    1.67
   5  -1   2   37.86    1.68
   5  -1   2   36.31    1.68
   5   1   2   37.90    1.71
   5   1   2   36.89    1.61
   5  -1   0   52.08    2.25
   5  -1   0   50.31    2.25
   5   1   0   49.92    2.28
   5   1   0   51.94    2.21
   5  -1  -2  147.74    6.33
   5   1  -2  151.66    6.32
   5  -1  -4  100.42    4.22
   5   1  -4   96.12    4.21
   5  -1  -6   10.70    0.60
  -5  -1   6   10.87    0.63
   5   1  -6    9.44    0.59
   5  -1  -8   60.15    2.60
  -5  -1   8   59.11    2.64
   5   1  -8   56.10    2.61
  -5   1   8   56.81    2.71
  -5  -1  10   42.81    2.16
   5  -1 -10   42.96    2.11
  -5   1  10   48.25    2.15
   5   1 -10   48.48    2.16
  -5   1  10   48.47    2.22
  -5  -1  12   10.01    0.67
   5  -1 -12   11.29    0.66
  -5  -1  12   11.57    0.72
  -5   1  12    9.92    0.63
   5   1 -12    8.36    0.64
  -5   1  12   10.78    0.67
  -5  -1  14   32.87    1.70
   5  -1 -14   31.19    1.63
   5   1 -14   35.77    1.70
  -5   1  14   33.88    1.67
  -5   1  14   33.30    1.68
   5  -1 -16   39.97    1.96
  -5  -1  16   40.03    2.04
  -5   1  16   39.92    1.99
   5   1 -16   41.43    2.01
  -5   1  16   40.84    2.02
   5  -1 -18   45.64    2.21
  -5  -1  18   43.66    2.29
  -5   1  18   46.15    2.24
   5   1 -18   46.67    2.26
  -5   1  18   46.18    2.29
   5  -1 -20    8.40    0.66
  -5  -1  20    8.05    0.79
  -5   1  20    9.22    0.75
   5   1 -20    7.67    0.66
   5  -1 -22    3.84    0.52
  -5  -1  22    3.88    0.58
  -5   1  22    3.37    0.54
   5   1 -22    4.01    0.53
  -5  -1  24    1.28    0.40
   5  -1 -24    0.90    0.33
  -5   1  24    1.35    0.41
   5   1 -24    1.68    0.40
   5  -1 -26    3.44    0.54
  -5  -1  26    3.82    0.63
  -5   1  26    5.58    0.75
   5   1 -26    3.84    0.56
  -5  -1  28    3.79    0.66
  -5   1  28    2.15    0.54
   5   1 -28    3.37    0.56
  -5  -1  30    0.31    0.36
  -5   1  30    0.51    0.39
   5   1 -30    0.82    0.39
  -5  -1  32    1.24    0.51
  -5   1  32    1.37    0.50
  -5  -1  34    0.17    0.41
  -5   1  34    0.13    0.44
  -5  -1  36    0.57    0.51
  -5   1  36    0.65    0.52
   5  -2  33    4.70    0.86
   5   2  33    2.60    0.74
   5  -2  31   10.88    1.22
   5   2  31    8.98    1.15
   5  -2  29   11.12    1.19
   5   2  29    8.98    1.10
   5  -2  27   10.48    1.13
   5   2  27    9.44    1.07
   5  -2  25   14.09    1.15
   5   2  25   15.31    1.18
   5  -2  23   12.67    1.03
   5   2  23   11.18    0.98
   5  -2  21   21.19    1.19
   5  -2  21   16.91    1.23
   5   2  21   19.72    1.29
   5   2  21   17.38    1.21
   5  -2  19    1.52    0.38
   5  -2  19    1.77    0.36
   5   2  19    1.67    0.41
   5   2  19    1.52    0.38
   5  -2  17    3.05    0.43
   5  -2  17    3.15    0.48
   5   2  17    2.71    0.45
   5   2  17    2.77    0.44
   5  -2  15    5.87    0.62
   5  -2  15    6.13    0.58
   5   2  15    5.36    0.59
   5   2  15    5.24    0.60
   5  -2  13    1.69    0.32
   5  -2  13    1.48    0.28
   5   2  13    1.97    0.35
   5  -2  11    9.43    0.68
   5  -2  11   10.03    0.67
   5   2  11   11.61    0.72
   5  -2   9    2.97    0.35
   5  -2   9    3.21    0.36
   5   2   9    1.42    0.26
   5  -2   7   12.60    0.76
   5  -2   7   12.51    0.74
   5   2   7   15.09    0.79
   5  -2   5   62.36    2.82
   5  -2   5   62.49    2.84
  -5  -2  -5   63.63    2.69
   5   2   5   65.69    2.86
   5  -2   3   79.37    3.47
   5  -2   3   80.86    3.51
  -5  -2  -3   79.73    3.40
   5   2   3   79.14    3.51
  -5  -2  -1   90.38    3.89
   5  -2   1   92.67    3.91
   5  -2   1   90.18    3.95
   5   2   1   89.90    3.96
   5  -2  -1   43.20    1.86
   5  -2  -1   40.96    1.93
  -5  -2   1   41.75    1.91
  -5  -2   3   79.58    3.43
   5  -2  -3   78.68    3.42
  -5   2   3   75.45    3.61
   5  -2  -5   57.85    2.63
  -5  -2   5   58.91    2.66
  -5   2   5   59.01    2.78
   5  -2  -7   29.25    1.51
  -5  -2   7   33.49    1.58
  -5   2   7   32.13    1.61
  -5  -2   9   19.52    1.07
   5  -2  -9   18.86    1.00
  -5   2   9   17.92    1.06
   5  -2 -11    7.94    0.59
  -5  -2  11    9.28    0.67
  -5   2  11    9.77    0.60
  -5   2  11    9.80    0.66
  -5  -2  13   16.45    1.01
  -5  -2  13   16.92    0.98
   5  -2 -13   18.34    0.96
  -5   2  13   15.28    0.93
  -5   2  13   15.30    0.98
   5  -2 -15    1.90    0.31
  -5  -2  15    2.08    0.37
  -5  -2  15    1.62    0.36
  -5   2  15    1.83    0.32
  -5   2  15    2.08    0.35
  -5  -2  17    1.64    0.37
  -5  -2  17    1.36    0.35
   5  -2 -17    1.19    0.29
  -5   2  17    1.19    0.30
  -5   2  17    1.40    0.31
  -5  -2  19    2.09    0.42
   5  -2 -19    1.98    0.38
  -5  -2  19    2.31    0.45
  -5   2  19    2.64    0.41
  -5   2  19    3.00    0.46
  -5  -2  21    2.30    0.46
   5  -2 -21    3.15    0.46
  -5  -2  21    2.78    0.49
  -5   2  21    2.38    0.41
  -5   2  21    2.32    0.44
   5  -2 -23    1.06    0.33
  -5  -2  23    1.07    0.38
  -5  -2  23    1.80    0.44
   5   2 -23    2.14    0.44
  -5   2  23    1.13    0.37
  -5  -2  25    1.62    0.48
  -5   2  25    1.37    0.41
   5   2 -25    0.98    0.36
  -5  -2  27    0.01    0.34
   5   2 -27    0.30    0.30
  -5   2  27   -0.02    0.31
  -5  -2  29    1.27    0.48
   5   2 -29    2.37    0.52
  -5   2  29    1.50    0.50
  -5  -2  31    0.21    0.41
  -5   2  31    0.07    0.36
   5   2 -31    0.23    0.34
  -5  -2  33    2.44    0.65
  -5   2  33    1.45    0.53
   5   2 -33    1.91    0.54
  -5  -2  35    1.02    0.53
  -5   2  35    1.31    0.54
   5  -3  32    0.07    0.49
   5   3  32    0.21    0.48
   5  -3  30    1.48    0.57
   5   3  30    0.80    0.52
   5  -3  28    0.35    0.40
   5   3  28    0.24    0.41
   5  -3  26    3.95    0.70
   5   3  26    2.29    0.57
   5  -3  24    4.58    0.66
   5  -3  24    4.22    0.69
   5   3  24    4.08    0.66
   5   3  24    4.13    0.67
   5  -3  22   19.02    1.28
   5  -3  22   17.72    1.20
   5   3  22   18.59    1.29
   5   3  22   16.01    1.23
   5  -3  20   11.73    0.94
   5  -3  20   11.50    0.89
   5   3  20   12.39    0.97
   5   3  20   12.04    0.95
   5  -3  18   39.14    2.06
   5  -3  18   39.92    2.12
   5   3  18   40.48    2.22
   5   3  18   40.22    2.11
   5  -3  16   16.79    1.04
   5  -3  16   16.64    1.02
   5   3  16   12.50    0.96
   5   3  16   15.41    1.09
   5  -3  14   62.29    3.05
   5  -3  14   64.50    3.05
   5   3  14   65.34    3.27
   5   3  14   66.74    3.08
   5  -3  12   40.69    2.07
   5  -3  12   42.82    2.11
   5   3  12   42.52    2.27
   5   3  12   43.87    2.10
   5  -3  10   49.63    2.38
   5  -3  10   51.85    2.42
   5   3  10   48.81    2.38
   5   3  10   52.27    2.61
  -5  -3  -8   44.22    1.92
   5  -3   8   45.91    2.07
   5  -3   8   45.02    2.14
   5   3   8   43.10    2.28
   5   3   8   41.87    2.08
  -5  -3  -6   19.86    0.95
   5  -3   6   18.95    1.10
   5  -3   6   19.18    1.01
   5   3   6   22.83    1.24
   5   3   6   20.85    1.06
   5  -3   4    9.34    0.53
   5  -3   4    9.15    0.63
  -5  -3  -4    8.78    0.53
   5   3   4    9.91    0.58
   5   3   4    9.14    0.69
   5  -3   2   16.50    0.93
  -5  -3  -2   17.60    0.85
   5  -3   2   17.03    0.78
   5   3   2   15.69    0.85
   5   3   2   13.07    0.95
  -5  -3   0    5.77    0.41
   5  -3   0    4.83    0.48
   5   3   0    4.48    0.50
  -5   3   0    5.03    0.46
   5   3   0    5.38    0.38
   5  -3  -2    9.41    0.64
  -5  -3   2    9.81    0.62
   5   3  -2    9.20    0.66
  -5   3   2   10.60    0.69
  -5  -3   4    2.14    0.30
   5  -3  -4    2.76    0.34
  -5   3   4    2.00    0.33
   5   3  -4    1.55    0.27
  -5  -3   6   15.50    0.86
   5  -3  -6   15.98    0.84
   5   3  -6   11.72    0.77
  -5   3   6   11.75    0.84
   5  -3  -8   19.93    1.08
  -5  -3   8   19.68    1.13
  -5   3   8   18.09    1.15
   5   3  -8   20.39    1.06
   5  -3 -10   14.24    0.83
  -5  -3  10   15.49    0.93
   5   3 -10   12.73    0.75
  -5   3  10   13.03    0.90
   5  -3 -12   22.34    1.13
  -5  -3  12   20.58    1.21
  -5   3  12   18.14    1.18
  -5   3  12   18.66    1.04
  -5  -3  14   36.22    1.89
   5  -3 -14   34.66    1.75
  -5   3  14   35.57    1.91
  -5   3  14   34.42    1.74
  -5  -3  16    7.95    0.80
   5  -3 -16    6.93    0.58
  -5   3  16    7.87    0.61
  -5   3  16    6.75    0.73
  -5  -3  18   12.00    0.91
   5  -3 -18   13.53    0.87
  -5  -3  18   13.97    0.99
  -5   3  18   11.95    0.91
  -5   3  18   12.42    0.87
  -5  -3  20    3.80    0.59
  -5  -3  20    4.50    0.61
   5  -3 -20    4.05    0.51
  -5   3  20    3.67    0.53
  -5   3  20    3.60    0.54
   5  -3 -22   13.29    0.95
  -5  -3  22   15.49    1.11
  -5  -3  22   14.75    1.12
  -5   3  22   15.01    1.08
  -5   3  22   15.38    1.06
  -5  -3  24    0.27    0.32
  -5  -3  24    0.33    0.35
  -5   3  24    0.28    0.33
  -5  -3  26    1.53    0.47
  -5  -3  26    2.84    0.59
  -5   3  26    2.44    0.54
  -5  -3  28    0.31    0.38
  -5  -3  28    0.10    0.36
   5   3 -28   -0.15    0.27
  -5   3  28    0.20    0.38
  -5  -3  30    0.54    0.40
   5   3 -30    0.89    0.42
  -5   3  30    0.73    0.46
  -5  -3  32    0.77    0.50
  -5   3  32    0.12    0.43
   5   3 -32    1.74    0.55
  -5  -3  34   -0.34    0.36
  -5   3  34   -0.07    0.43
   5   3 -34   -0.17    0.38
   5  -4  29    2.48    0.68
   5   4  29    3.93    0.77
   5  -4  27    6.03    0.86
   5   4  27    6.19    0.88
   5  -4  25   10.10    1.07
   5  -4  25   10.53    1.09
   5   4  25   11.88    1.14
   5   4  25   11.43    1.19
   5  -4  23   11.02    1.06
   5  -4  23    9.62    1.02
   5   4  23   11.24    1.16
   5   4  23   10.12    1.03
   5  -4  21    3.64    0.60
   5  -4  21    3.95    0.61
   5   4  21    3.90    0.68
   5   4  21    3.81    0.62
   5  -4  19    3.40    0.53
   5  -4  19    3.53    0.56
   5   4  19    3.03    0.53
   5   4  19    2.34    0.54
   5  -4  17    0.77    0.33
   5  -4  17    0.66    0.30
   5   4  17   -0.09    0.28
   5   4  17    0.75    0.32
   5  -4  15   19.24    1.20
   5  -4  15   16.66    1.09
   5   4  15   19.11    1.30
   5   4  15   17.57    1.12
   5  -4  13    0.18    0.24
   5  -4  13    0.56    0.25
   5   4  13    0.64    0.27
   5   4  13   -0.12    0.22
   5  -4  11    1.53    0.35
   5   4  11    1.25    0.29
   5   4  11    1.13    0.36
   5  -4   9    7.32    0.71
   5   4   9    6.42    0.73
   5   4   9    6.30    0.51
   5  -4   7   17.71    1.05
   5   4   7   15.40    0.92
   5   4   7   17.39    1.15
   5  -4   5   22.26    1.23
  -5  -4  -5   20.83    1.07
   5   4   5   21.24    1.09
   5   4   5   19.88    1.29
  -5  -4  -3   29.15    1.49
   5  -4   3   29.40    1.60
   5   4   3   31.76    1.49
   5   4   3   32.14    1.74
  -5   4  -3   31.23    1.66
   5  -4   1   58.77    2.84
  -5  -4  -1   56.53    2.75
   5   4   1   62.74    3.04
   5   4   1   64.25    2.74
  -5   4  -1   61.52    2.99
   5  -4  -1   38.39    1.97
  -5  -4   1   36.94    1.91
   5   4  -1   41.79    2.10
   5   4  -1   40.25    1.86
  -5   4   1   42.18    2.09
  -5  -4   3   32.40    1.65
   5  -4  -3   31.86    1.68
   5   4  -3   33.33    1.76
  -5   4   3   34.20    1.80
   5  -4  -5   23.13    1.26
  -5  -4   5   22.45    1.27
   5   4  -5   23.63    1.30
  -5   4   5   22.31    1.35
   5  -4  -7   29.72    1.56
  -5  -4   7   31.84    1.62
  -5   4   7   30.52    1.71
   5   4  -7   29.03    1.58
  -5  -4   9   17.34    1.09
   5  -4  -9   16.97    1.02
   5   4  -9   17.33    1.01
  -5   4   9   19.01    1.19
   5  -4 -11   13.11    0.82
  -5  -4  11   11.26    0.88
  -5   4  11   11.28    0.91
   5  -4 -13    1.37    0.30
  -5  -4  13    1.06    0.33
  -5   4  13    0.62    0.31
   5  -4 -15    5.86    0.59
  -5  -4  15    5.46    0.69
  -5   4  15    5.34    0.68
  -5  -4  17    1.86    0.45
   5  -4 -17    2.65    0.42
  -5   4  17    2.59    0.49
   5  -4 -19    0.46    0.24
  -5  -4  19    0.04    0.28
  -5   4  19    0.38    0.30
  -5  -4  21    0.40    0.34
  -5   4  21    1.47    0.43
  -5  -4  23    1.82    0.51
  -5   4  23    2.54    0.54
  -5  -4  25    0.22    0.36
  -5  -4  25    0.36    0.38
  -5   4  25    0.18    0.36
  -5  -4  27    1.23    0.50
  -5  -4  27    0.93    0.42
  -5  -4  29    1.15    0.52
  -5  -4  29    0.39    0.44
  -5  -4  31   -0.01    0.39
  -5  -4  31    0.07    0.38
   5  -5  26    0.06    0.41
   5   5  26    0.25    0.44
   5  -5  24   -0.20    0.36
   5   5  24    0.53    0.43
   5  -5  22    3.09    0.63
   5   5  22    3.45    0.69
   5  -5  20    9.52    1.01
   5   5  20    9.49    1.10
   5  -5  18   12.38    1.03
   5   5  18   13.07    1.14
   5  -5  16   11.76    1.10
   5   5  16   10.21    1.14
   5  -5  14   19.54    1.33
   5   5  14   21.15    1.49
   5  -5  12   15.27    1.10
   5   5  12   15.86    1.21
   5  -5  10   18.86    1.20
   5   5  10   16.24    1.27
   5  -5   8    4.98    0.64
   5   5   8    7.40    0.84
   5  -5   6   31.97    1.74
   5   5   6   30.78    1.86
   5  -5   4   14.69    1.02
  -5  -5  -4   14.60    0.91
  -5   5  -4   15.61    1.05
   5   5   4   16.13    1.14
   5  -5   2    0.88    0.29
  -5  -5  -2    1.21    0.28
   5   5   2    1.78    0.41
  -5   5  -2    1.30    0.36
  -5  -5   0    2.32    0.37
   5  -5   0    3.24    0.46
  -5   5   0    2.04    0.42
   5   5   0    1.34    0.36
  -5  -5   2    0.47    0.23
   5  -5  -2    1.06    0.31
  -5   5   2    0.60    0.29
   5   5  -2    0.55    0.29
  -5  -5   4    1.96    0.38
   5  -5  -4    1.99    0.39
   5   5  -4    2.56    0.43
  -5   5   4    2.22    0.44
   5  -5  -6    3.63    0.50
  -5  -5   6    3.65    0.52
   5   5  -6    4.99    0.56
  -5   5   6    3.18    0.56
  -5  -5   8    7.12    0.74
   5  -5  -8    7.97    0.73
  -5   5   8    6.82    0.79
   5   5  -8    6.37    0.65
  -5  -5  10    7.96    0.81
   5  -5 -10    8.21    0.66
  -5   5  10    6.12    0.78
  -5  -5  12    1.58    0.43
   5  -5 -12    2.33    0.41
  -5   5  12    2.35    0.50
   5  -5 -14   19.76    1.18
  -5  -5  14   20.15    1.33
  -5   5  14   18.83    1.35
   5  -5 -16    1.36    0.33
  -5  -5  16    1.01    0.39
  -5   5  16    1.13    0.43
  -5  -5  18    7.84    0.93
  -5   5  18    7.46    0.90
  -5  -5  20    0.46    0.37
  -5   5  20    0.33    0.38
  -5  -5  22    0.90    0.47
  -5   5  22    1.64    0.48
  -5  -5  24    0.80    0.45
  -5   5  24    0.34    0.39
  -5  -5  26    0.86    0.48
  -5   5  26    0.76    0.46
  -5  -5  28   -0.46    0.39
   5   6  25    1.25    0.61
   5  -6  23    1.63    0.57
   5   6  23    0.58    0.52
   5  -6  21    3.62    0.73
   5   6  21    4.89    0.87
   5  -6  19    2.13    0.58
   5   6  19    1.79    0.60
   5  -6  17    1.43    0.47
   5   6  17    1.57    0.56
   5  -6  15    0.80    0.41
   5   6  15   -0.09    0.39
   5  -6  13    0.42    0.37
   5   6  13    0.18    0.35
   5  -6  11    3.75    0.62
   5   6  11    4.89    0.77
   5  -6   9    1.99    0.47
   5   6   9    3.78    0.69
   5  -6   7   20.11    1.34
   5   6   7   21.05    1.50
   5  -6   5   11.35    0.90
   5   6   5    8.27    0.98
  -5   6  -5    9.62    0.94
   5  -6   3    8.20    0.87
  -5   6  -3   10.58    0.90
   5   6   3    9.94    1.02
   5  -6   1   10.41    0.89
  -5  -6  -1   11.99    0.87
  -5   6  -1   13.26    0.99
   5   6   1   12.22    1.01
  -5  -6   1   13.77    0.99
   5  -6  -1   12.57    0.98
  -5   6   1   16.20    1.12
   5   6  -1   14.17    1.09
  -5  -6   3   11.06    0.89
   5  -6  -3   12.14    0.92
  -5   6   3   12.49    1.01
   5   6  -3   12.78    0.98
   5  -6  -5    9.31    0.76
  -5  -6   5    6.89    0.78
  -5   6   5    8.23    0.92
   5   6  -5    7.43    0.80
  -5  -6   7    8.18    0.85
   5  -6  -7    7.39    0.78
  -5   6   7    7.98    0.92
   5   6  -7    8.04    0.81
   5  -6  -9    9.47    0.77
  -5  -6   9    7.67    0.87
  -5   6   9    7.09    0.90
   5  -6 -11    3.60    0.54
  -5  -6  11    3.74    0.63
  -5   6  11    4.25    0.72
  -5  -6  13   -0.01    0.31
   5  -6 -13    0.09    0.24
  -5   6  13    0.11    0.34
  -5  -6  15    1.27    0.47
  -5   6  15    2.13    0.55
  -5  -6  17    2.11    0.57
  -5   6  17    1.26    0.48
  -5  -6  19    0.97    0.44
  -5   6  19    2.02    0.56
  -5  -6  21   -0.27    0.33
  -5   6  21    0.26    0.42
  -5  -6  23    0.24    0.40
  -5   6  23    0.17    0.42
  -5   6  25    0.85    0.51
  -5   6  27   -0.10    0.46
   5   7  20    1.96    0.67
   5  -7  18    5.13    0.84
   5   7  18    4.17    0.87
   5  -7  16    5.98    0.90
   5   7  16    6.89    1.05
   5  -7  14    3.05    0.65
   5   7  14    1.57    0.60
   5  -7  12    7.98    0.97
   5   7  12    8.19    1.10
   5  -7  10    2.88    0.63
   5   7  10    2.98    0.71
   5  -7   8    1.65    0.48
   5   7   8    2.23    0.59
   5  -7   6    2.24    0.54
   5   7   6    2.27    0.61
   5  -7   4    2.65    0.54
  -5   7  -4    1.89    0.52
   5   7   4    0.95    0.47
   5  -7   2    0.80    0.38
   5   7   2    1.17    0.45
  -5   7  -2    0.73    0.43
   5  -7   0    1.00    0.39
  -5   7   0    2.52    0.58
   5   7   0    1.56    0.48
  -5  -7   2    0.00    0.28
   5  -7  -2    0.21    0.30
  -5   7   2   -0.05    0.34
   5   7  -2    0.19    0.34
  -5  -7   4    1.26    0.38
   5  -7  -4    0.98    0.37
   5   7  -4    1.01    0.42
  -5   7   4    0.54    0.40
   5  -7  -6    1.08    0.39
  -5  -7   6    1.12    0.39
  -5   7   6    0.88    0.46
   5  -7  -8    1.80    0.46
  -5  -7   8    2.09    0.54
  -5   7   8    2.36    0.60
   5  -7 -10    1.66    0.44
  -5  -7  10    0.78    0.41
  -5   7  10    3.00    0.68
  -5  -7  12    1.29    0.49
  -5   7  12    0.86    0.50
  -5  -7  14    1.41    0.51
  -5   7  14    1.55    0.57
  -5  -7  16    1.67    0.55
  -5   7  16    0.62    0.48
  -5  -7  18    1.28    0.52
  -5   7  18    1.17    0.55
  -5  -7  20    0.79    0.47
  -5   7  20    1.72    0.59
  -5   7  22    0.35    0.45
   5   8  15   -0.62    0.43
   5   8  13    0.08    0.49
   5   8  11    0.99    0.54
   5  -8   9    0.64    0.47
   5   8   9    0.75    0.52
   5  -8   7    0.94    0.48
   5   8   7    0.60    0.52
   5  -8   5    2.74    0.63
   5   8   5    2.68    0.70
   5  -8   3    4.06    0.74
   5   8   3    4.28    0.79
  -5   8  -3    5.23    0.83
   5  -8   1    4.53    0.74
   5   8   1    4.54    0.81
  -5   8  -1    4.39    0.78
   5  -8  -1    2.25    0.56
  -5   8   1    2.24    0.62
   5   8  -1    1.48    0.54
   5  -8  -3    3.21    0.62
   5   8  -3    3.12    0.66
  -5   8   3    3.32    0.74
  -5  -8   5    2.70    0.61
   5  -8  -5    2.08    0.54
  -5   8   5    3.67    0.76
  -5  -8   7    1.37    0.52
   5  -8  -7    1.82    0.51
  -5   8   7    0.95    0.56
  -5  -8   9   -0.13    0.36
  -5   8   9    0.68    0.53
  -5  -8  11    0.84    0.49
  -5   8  11    1.07    0.56
  -5  -8  13    0.80    0.50
  -5   8  13    0.18    0.46
  -5   8  15    0.06    0.43
  -5   8  17   -0.43    0.40
   6   0  32   -0.04    0.46
   6   0  30    2.01    0.65
   6   0  28    0.69    0.47
   6   0  26    0.12    0.36
   6   0  24   -0.05    0.31
   6   0  22    0.02    0.28
   6   0  20    6.98    0.78
   6   0  18    0.44    0.27
   6   0  16    0.09    0.22
   6   0  14   -0.09    0.15
   6   0  14    0.05    0.12
   6   0  12    0.27    0.12
   6   0  12    0.15    0.17
   6   0  10    2.44    0.24
   6   0  10    2.02    0.32
   6   0   8    1.66    0.17
   6   0   8    1.19    0.24
   6   0   6    0.08    0.07
   6   0   6    0.11    0.11
   6   0   4    0.47    0.11
   6   0   4    0.65    0.16
   6   0   2   26.27    1.24
   6   0   2   25.20    1.17
   6   0   0   22.27    1.06
   6   0   0   21.35    1.02
   6   0  -2  121.61    5.16
   6   0  -4  572.36   23.81
   6   0  -6    0.61    0.16
   6   0  -8   11.46    0.68
   6   0 -10   24.13    1.23
   6   0 -12   63.88    2.89
  -6   0  12   62.92    2.91
  -6   0  14    4.11    0.47
   6   0 -14    5.01    0.51
   6   0 -16   15.61    0.96
  -6   0  16   16.54    1.00
   6   0 -18    9.52    0.74
  -6   0  18   10.34    0.77
  -6   0  20   10.66    0.84
   6   0 -20   11.50    0.84
   6   0 -22    2.32    0.43
  -6   0  22    2.26    0.48
   6   0 -24   73.77    3.44
  -6   0  24   70.62    3.54
   6   0 -26   25.34    1.47
  -6   0  26   23.81    1.55
  -6   0  28    8.60    1.00
   6   0 -28   10.75    0.99
  -6   0  30    7.95    0.96
   6   0 -30    7.08    0.84
  -6   0  32    6.39    0.91
  -6   0  34    4.40    0.79
  -6   0  36    5.53    0.94
   6  -1  33    0.62    0.54
   6   1  33    0.05    0.47
   6  -1  31    0.79    0.50
   6   1  31    0.38    0.49
   6  -1  29   -0.29    0.34
   6   1  29   -0.18    0.40
   6  -1  27    0.69    0.44
   6   1  27    0.14    0.39
   6  -1  25    0.20    0.36
   6   1  25    0.62    0.40
   6  -1  23    1.60    0.46
   6   1  23    1.43    0.45
   6  -1  21    7.94    0.87
   6   1  21    7.22    0.84
   6  -1  19    1.96    0.43
   6   1  19    1.91    0.42
   6  -1  17    8.65    0.63
   6  -1  17   10.03    0.78
   6   1  17    9.73    0.79
   6  -1  15    2.86    0.35
   6  -1  15    3.99    0.51
   6   1  15    1.88    0.38
   6  -1  13   16.43    0.98
   6  -1  13   14.73    0.84
   6   1  13   15.24    0.95
   6  -1  11    8.93    0.55
   6  -1  11    8.29    0.62
   6   1  11    7.78    0.60
   6  -1   9   22.55    1.12
   6  -1   9   23.78    1.21
   6   1   9   21.60    1.20
   6  -1   7    8.94    0.55
   6  -1   7    9.39    0.60
   6   1   7   10.10    0.61
   6  -1   5   40.46    1.92
   6  -1   5   42.02    1.89
   6   1   5   42.05    1.77
   6   1   5   41.69    1.94
   6  -1   3   30.97    1.46
   6  -1   3   31.53    1.48
   6   1   3   31.93    1.38
   6   1   3   31.85    1.51
   6  -1   1    2.68    0.27
   6  -1   1    2.82    0.29
   6   1   1    3.84    0.25
   6   1   1    3.51    0.33
   6  -1  -1   43.87    1.94
   6  -1  -1   42.97    1.92
   6   1  -1   41.20    1.89
   6   1  -1   43.16    1.96
   6  -1  -3  309.66   12.91
   6   1  -3  306.99   12.89
   6  -1  -5   32.23    1.54
   6   1  -5   33.59    1.54
   6  -1  -7   18.93    1.02
   6   1  -7   20.89    1.04
   6  -1  -9   43.67    2.06
   6   1  -9   45.32    2.08
   6  -1 -11   44.47    1.99
   6   1 -11   39.48    1.99
   6  -1 -13   57.99    2.53
  -6  -1  13   57.77    2.59
  -6   1  13   51.47    2.54
   6   1 -13   50.97    2.54
   6  -1 -15   32.30    1.60
  -6  -1  15   30.81    1.65
  -6   1  15   31.55    1.61
   6   1 -15   32.62    1.64
  -6   1  15   30.52    1.62
   6  -1 -17   49.81    2.40
  -6  -1  17   52.37    2.49
   6   1 -17   47.70    2.40
  -6   1  17   49.56    2.43
  -6   1  17   51.33    2.46
  -6  -1  19   36.37    1.89
   6  -1 -19   35.06    1.79
   6   1 -19   36.22    1.82
  -6   1  19   32.85    1.84
  -6   1  19   34.00    1.78
  -6  -1  21   42.99    2.34
   6  -1 -21   42.28    2.24
   6   1 -21   46.42    2.29
  -6   1  21   49.84    2.36
   6  -1 -23   14.65    1.01
  -6  -1  23   13.61    1.07
  -6   1  23   16.93    1.14
   6   1 -23   16.79    1.09
   6  -1 -25   26.94    1.54
  -6  -1  25   26.32    1.67
   6   1 -25   26.87    1.57
  -6   1  25   27.38    1.64
  -6  -1  27   14.38    1.16
   6  -1 -27   14.75    1.05
   6   1 -27   13.28    1.02
  -6   1  27   13.69    1.11
  -6  -1  29    1.63    0.50
   6   1 -29    2.03    0.48
  -6   1  29    0.99    0.46
  -6  -1  31    1.32    0.48
  -6   1  31    0.92    0.49
   6   1 -31    1.86    0.48
  -6  -1  33    0.32    0.41
  -6   1  33    0.55    0.46
  -6  -1  35    1.22    0.55
  -6   1  35    0.41    0.50
   6  -2  32   -0.18    0.47
   6   2  32    0.21    0.50
   6  -2  30    0.04    0.41
   6   2  30    0.47    0.49
   6  -2  28    0.27    0.46
   6   2  28    1.30    0.50
   6  -2  26    1.05    0.45
   6   2  26    0.65    0.47
   6  -2  24   -0.02    0.34
   6   2  24    0.01    0.36
   6  -2  22    3.37    0.60
   6   2  22    2.96    0.54
   6   2  22    2.84    0.58
   6  -2  20   -0.11    0.22
   6  -2  20    0.24    0.30
   6   2  20    0.08    0.25
   6   2  20    0.21    0.30
   6  -2  18    2.36    0.45
   6  -2  18    2.66    0.42
   6   2  18    2.30    0.47
   6   2  18    2.90    0.48
   6  -2  16    1.58    0.37
   6  -2  16    1.73    0.32
   6   2  16    2.29    0.42
   6   2  16    1.71    0.37
   6  -2  14    5.26    0.52
   6  -2  14    4.94    0.56
   6   2  14    4.81    0.55
   6  -2  12    0.03    0.19
   6  -2  12    0.27    0.17
   6   2  12    0.00    0.18
   6  -2  10    3.39    0.39
   6  -2  10    2.38    0.33
   6   2  10    1.99    0.33
   6  -2   8    6.01    0.45
   6  -2   8    5.64    0.46
   6   2   8    5.47    0.45
   6  -2   6    5.29    0.42
   6  -2   6    6.23    0.46
   6   2   6    5.94    0.45
   6   2   6    5.79    0.28
   6  -2   4   33.39    1.52
   6  -2   4   32.07    1.55
   6   2   4   30.73    1.54
   6   2   4   32.41    1.41
   6  -2   2   37.44    1.75
   6  -2   2   36.72    1.81
  -6  -2  -2   37.36    1.73
   6   2   2   43.63    1.83
  -6  -2   0   25.68    1.25
   6  -2   0   27.33    1.23
   6  -2   0   25.14    1.29
   6   2   0   26.77    1.28
  -6  -2   2    5.04    0.39
   6  -2  -2    4.80    0.32
   6  -2  -2    4.98    0.41
   6  -2  -4   25.26    1.22
  -6  -2   4   22.81    1.21
   6  -2  -6   61.16    2.73
  -6  -2   6   61.74    2.76
  -6   2   6   57.76    2.87
   6  -2  -8   97.30    4.24
  -6  -2   8   97.48    4.30
  -6   2   8   94.99    4.48
  -6  -2  10    8.55    0.68
   6  -2 -10    9.06    0.63
  -6   2  10   11.63    0.71
  -6  -2  12   50.55    2.39
   6  -2 -12   47.27    2.28
  -6   2  12   46.35    2.26
  -6   2  12   50.75    2.42
  -6  -2  14    3.85    0.51
   6  -2 -14    5.11    0.51
  -6   2  14    3.49    0.42
  -6   2  14    3.54    0.45
   6  -2 -16   15.80    0.96
  -6  -2  16   13.56    1.00
  -6  -2  16   15.42    0.99
  -6   2  16   16.80    0.98
  -6   2  16   15.88    0.99
  -6  -2  18    1.07    0.36
   6  -2 -18    2.27    0.38
  -6  -2  18    1.98    0.39
  -6   2  18    2.20    0.39
  -6   2  18    1.75    0.35
  -6  -2  20    3.22    0.51
  -6  -2  20    2.12    0.44
   6  -2 -20    2.65    0.44
   6   2 -20    3.06    0.48
  -6   2  20    3.21    0.46
  -6   2  20    2.83    0.47
   6  -2 -22    1.34    0.36
  -6  -2  22    1.86    0.45
  -6   2  22    1.73    0.40
   6   2 -22    2.08    0.43
   6  -2 -24   12.88    0.93
  -6  -2  24   13.65    1.05
  -6   2  24   13.01    1.01
   6   2 -24   11.87    0.97
   6  -2 -26    4.56    0.60
  -6  -2  26    4.28    0.68
   6   2 -26    4.03    0.61
  -6   2  26    3.46    0.62
  -6  -2  28   10.25    1.12
   6   2 -28   11.28    0.94
  -6   2  28   12.17    1.03
  -6  -2  30    8.36    1.02
   6   2 -30   11.47    1.07
  -6   2  30    9.75    1.06
  -6  -2  32   11.45    1.22
   6   2 -32   10.07    1.06
  -6   2  32   11.75    1.20
  -6  -2  34    8.64    1.07
  -6   2  34    6.33    0.93
   6   2 -34    6.82    0.90
   6  -3  31    0.34    0.49
   6   3  31    0.36    0.51
   6  -3  29    0.09    0.42
   6   3  29    0.05    0.43
   6  -3  27    1.14    0.49
   6   3  27    0.63    0.43
   6  -3  25    0.79    0.40
   6   3  25    0.74    0.43
   6  -3  23    0.13    0.30
   6  -3  23    0.03    0.29
   6   3  23    0.48    0.38
   6   3  23    0.28    0.34
   6  -3  21   -0.41    0.25
   6  -3  21    0.80    0.33
   6   3  21    1.28    0.42
   6   3  21    0.80    0.36
   6  -3  19    3.07    0.52
   6  -3  19    2.18    0.42
   6   3  19    2.47    0.47
   6   3  19    1.90    0.46
   6  -3  17   10.81    0.84
   6  -3  17   11.16    0.84
   6   3  17   11.23    0.86
   6   3  17    9.38    0.85
   6  -3  15    8.11    0.70
   6  -3  15    8.03    0.77
   6   3  15    9.10    0.72
   6   3  15    9.15    0.80
   6  -3  13   22.98    1.23
   6  -3  13   21.27    1.23
   6   3  13   18.66    1.28
   6   3  13   19.78    1.20
   6  -3  11    2.54    0.39
   6  -3  11    3.15    0.40
   6   3  11    1.44    0.36
   6   3  11    1.75    0.33
   6  -3   9    3.61    0.40
   6  -3   9    4.10    0.47
   6   3   9    3.55    0.50
   6   3   9    3.16    0.41
   6  -3   7   14.91    0.91
   6  -3   7   14.86    0.84
   6   3   7   15.70    0.88
   6  -3   5   13.44    0.81
   6  -3   5   12.80    0.71
  -6  -3  -5   13.30    0.67
   6   3   5   11.50    0.73
   6  -3   3   35.59    1.62
  -6  -3  -3   35.75    1.64
   6  -3   3   34.91    1.75
   6   3   3   35.63    1.70
   6  -3   1    3.79    0.28
   6  -3   1    3.85    0.43
  -6  -3  -1    3.82    0.37
   6   3   1    4.22    0.35
  -6  -3   1    8.22    0.56
   6  -3  -1    7.70    0.57
   6  -3  -1    8.63    0.45
  -6   3   1    8.02    0.64
   6   3  -1    8.17    0.53
  -6  -3   3    4.37    0.45
   6  -3  -3    3.95    0.27
   6  -3  -3    3.45    0.41
  -6   3   3    5.38    0.53
  -6  -3   5    6.75    0.53
   6  -3  -5    6.52    0.52
  -6   3   5    6.48    0.55
   6  -3  -7   27.66    1.41
  -6  -3   7   25.71    1.44
  -6   3   7   28.86    1.52
  -6  -3   9   13.43    0.89
   6  -3  -9   11.69    0.80
  -6   3   9   13.84    0.91
   6   3  -9   13.87    0.78
  -6  -3  11   35.47    1.96
   6  -3 -11   36.29    1.88
  -6   3  11   41.41    2.05
   6   3 -11   39.84    1.86
   6  -3 -13   36.48    1.84
  -6  -3  13   35.55    1.93
  -6   3  13   37.87    1.98
   6  -3 -15   22.66    1.24
  -6  -3  15   20.35    1.31
  -6   3  15   22.81    1.21
  -6   3  15   21.24    1.32
   6  -3 -17   25.05    1.42
  -6  -3  17   29.77    1.61
  -6   3  17   25.73    1.43
  -6   3  17   26.09    1.55
   6  -3 -19   25.10    1.39
  -6  -3  19   22.77    1.49
  -6   3  19   24.51    1.47
  -6   3  19   25.53    1.42
  -6  -3  21   15.20    1.14
  -6  -3  21   15.92    1.10
   6  -3 -21   16.68    1.04
  -6   3  21   13.64    1.06
  -6   3  21   15.51    1.06
  -6  -3  23   11.84    1.03
   6  -3 -23   13.56    0.96
  -6  -3  23   13.66    1.03
  -6   3  23   13.62    1.01
  -6   3  23   12.82    0.99
  -6  -3  25   12.83    1.17
  -6  -3  25    8.93    0.99
  -6   3  25   10.87    0.94
  -6  -3  27    6.70    0.86
  -6  -3  27    6.52    0.85
  -6   3  27    7.92    0.89
   6   3 -27    7.00    0.86
  -6  -3  29    5.52    0.81
   6   3 -29    3.90    0.68
  -6   3  29    6.06    0.81
  -6  -3  31    0.47    0.45
  -6   3  31    0.18    0.40
   6   3 -31    0.29    0.38
  -6  -3  33    0.23    0.43
  -6   3  33    0.34    0.47
   6   3 -33    1.10    0.46
   6  -4  30    0.84    0.53
   6   4  30    0.56    0.52
   6  -4  28    1.44    0.56
   6   4  28    0.20    0.45
   6  -4  26    1.70    0.55
   6   4  26    1.28    0.53
   6   4  26    1.62    0.52
   6  -4  24    0.29    0.38
   6  -4  24   -0.22    0.30
   6   4  24    0.28    0.39
   6   4  24   -0.11    0.33
   6  -4  22    0.89    0.40
   6  -4  22    0.14    0.34
   6   4  22   -0.05    0.34
   6   4  22    0.39    0.38
   6  -4  20    0.08    0.27
   6  -4  20    0.05    0.28
   6   4  20    0.71    0.38
   6   4  20    0.67    0.36
   6  -4  18    3.30    0.56
   6  -4  18    3.51    0.54
   6   4  18    2.76    0.57
   6   4  18    3.18    0.54
   6  -4  16    0.72    0.31
   6  -4  16    0.79    0.33
   6   4  16    0.13    0.26
   6   4  16    0.58    0.34
   6  -4  14    6.05    0.63
   6  -4  14    6.19    0.72
   6   4  14    6.60    0.79
   6   4  14    5.86    0.64
   6  -4  12    7.61    0.76
   6   4  12    7.71    0.85
   6   4  12    7.19    0.61
   6  -4  10    3.06    0.47
   6   4  10    3.49    0.56
   6   4  10    3.83    0.45
   6  -4   8    1.99    0.40
   6   4   8    3.49    0.41
   6   4   8    3.42    0.54
   6  -4   6    3.71    0.49
   6   4   6    4.50    0.60
   6   4   6    3.43    0.40
  -6  -4  -4    4.21    0.40
   6  -4   4    3.81    0.49
   6   4   4    4.36    0.56
   6   4   4    4.01    0.42
   6  -4   2   33.88    1.74
  -6  -4  -2   34.56    1.64
   6   4   2   32.99    1.63
   6   4   2   32.92    1.86
  -6  -4   0   30.53    1.48
   6  -4   0   32.47    1.56
   6   4   0   25.83    1.40
  -6   4   0   28.57    1.61
   6   4   0   27.83    1.62
   6  -4  -2   18.98    1.14
  -6  -4   2   17.87    1.09
  -6   4   2   20.61    1.22
   6   4  -2   21.80    1.07
   6   4  -2   20.32    1.22
   6  -4  -4   26.01    1.38
  -6  -4   4   26.80    1.38
   6   4  -4   24.46    1.43
  -6   4   4   24.75    1.47
   6  -4  -6   10.25    0.76
  -6  -4   6   11.55    0.81
  -6   4   6   10.99    0.84
   6   4  -6   11.94    0.78
   6  -4  -8   24.41    1.42
  -6  -4   8   26.60    1.49
   6   4  -8   26.78    1.45
  -6   4   8   30.51    1.62
  -6  -4  10   11.46    0.86
   6  -4 -10   12.05    0.81
  -6   4  10   12.57    0.91
   6   4 -10   10.93    0.74
  -6  -4  12    9.83    0.83
   6  -4 -12   10.35    0.74
  -6   4  12    9.64    0.82
   6  -4 -14    2.42    0.39
  -6  -4  14    1.83    0.44
  -6   4  14    3.88    0.57
  -6  -4  16    2.22    0.48
   6  -4 -16    2.47    0.42
  -6   4  16    2.65    0.51
  -6  -4  18    0.01    0.27
   6  -4 -18    0.12    0.23
  -6   4  18   -0.14    0.25
  -6  -4  20    6.07    0.82
   6  -4 -20    8.25    0.77
  -6   4  20    7.15    0.84
  -6  -4  22    2.06    0.51
  -6   4  22    0.76    0.39
  -6  -4  24    2.23    0.54
  -6   4  24    2.28    0.54
  -6  -4  26    6.49    0.89
  -6  -4  28    4.22    0.77
  -6  -4  30    6.91    0.97
   6   4 -30    8.82    1.03
   6   5  27    0.42    0.48
   6  -5  25   -0.04    0.37
   6   5  25   -0.01    0.38
   6  -5  23   -0.26    0.34
   6   5  23   -0.61    0.34
   6  -5  21    0.26    0.37
   6   5  21    0.31    0.41
   6  -5  19    1.23    0.45
   6   5  19    0.60    0.43
   6  -5  17    1.68    0.49
   6   5  17    2.38    0.56
   6  -5  15    1.90    0.48
   6   5  15    2.91    0.62
   6  -5  13    3.73    0.60
   6   5  13    5.46    0.78
   6  -5  11    3.80    0.59
   6   5  11    5.86    0.77
   6  -5   9    6.07    0.71
   6   5   9    6.26    0.81
   6  -5   7    2.70    0.47
   6   5   7    2.38    0.51
   6  -5   5    3.94    0.54
   6   5   5    3.89    0.61
   6  -5   3    0.95    0.31
  -6  -5  -3    1.10    0.28
   6   5   3    1.17    0.38
  -6   5  -3    1.31    0.36
  -6  -5  -1   -0.22    0.16
   6  -5   1    0.03    0.19
  -6   5  -1    0.02    0.25
   6   5   1   -0.11    0.22
  -6  -5   1    1.17    0.28
   6  -5  -1    1.56    0.35
  -6   5   1    0.78    0.33
   6   5  -1    0.83    0.32
  -6  -5   3    7.13    0.72
   6  -5  -3    8.77    0.71
  -6   5   3    9.41    0.79
   6   5  -3    8.30    0.73
  -6  -5   5    0.32    0.23
   6  -5  -5   -0.04    0.21
  -6   5   5   -0.06    0.23
   6   5  -5   -0.11    0.21
   6  -5  -7    3.82    0.52
  -6  -5   7    5.91    0.66
  -6   5   7    3.90    0.59
   6   5  -7    5.25    0.59
  -6  -5   9    7.39    0.78
   6  -5  -9    6.83    0.70
   6   5  -9    8.82    0.67
  -6   5   9    7.70    0.85
   6  -5 -11    5.93    0.64
  -6  -5  11    4.68    0.65
  -6   5  11    6.17    0.78
  -6  -5  13    4.76    0.69
   6  -5 -13    4.60    0.58
  -6   5  13    6.19    0.78
   6  -5 -15   16.92    1.06
  -6  -5  15   13.40    1.12
  -6   5  15   14.90    1.19
  -6  -5  17   19.19    1.39
   6  -5 -17   20.47    1.25
  -6   5  17   20.00    1.43
  -6  -5  19   10.27    1.09
  -6   5  19    8.36    0.99
  -6  -5  21   13.58    1.16
  -6   5  21   13.11    1.14
  -6  -5  23    5.93    0.85
  -6   5  23    6.60    0.87
  -6  -5  25    5.16    0.84
  -6   5  25    5.12    0.80
  -6  -5  27    1.83    0.64
   6   6  24   -0.03    0.46
   6  -6  22   -0.25    0.34
   6   6  22   -0.38    0.40
   6  -6  20    0.57    0.41
   6   6  20   -0.36    0.36
   6  -6  18    0.06    0.39
   6   6  18   -0.26    0.36
   6  -6  16    0.37    0.38
   6   6  16   -0.06    0.35
   6  -6  14   -0.15    0.31
   6   6  14    0.18    0.38
   6  -6  12    1.11    0.41
   6   6  12    1.69    0.52
   6  -6  10    1.24    0.41
   6   6  10    0.96    0.45
   6  -6   8    0.51    0.31
   6   6   8    0.95    0.45
   6  -6   6   10.41    0.88
   6   6   6    9.45    1.07
   6  -6   4    0.70    0.33
   6   6   4    0.64    0.39
   6  -6   2    2.21    0.47
   6   6   2    2.50    0.55
  -6   6  -2    2.15    0.50
  -6  -6   0    9.17    0.78
   6  -6   0    9.71    0.94
   6   6   0    8.54    0.96
  -6   6   0   11.74    0.97
  -6  -6   2    9.25    0.77
   6  -6  -2    9.66    0.91
  -6   6   2    8.00    0.90
   6   6  -2    9.42    0.96
   6  -6  -4    9.87    0.83
  -6  -6   4   10.54    0.84
   6   6  -4   10.36    0.87
  -6   6   4    8.91    0.97
  -6  -6   6    4.29    0.63
   6  -6  -6    4.96    0.64
  -6   6   6    4.72    0.71
   6   6  -6    4.04    0.58
   6  -6  -8    5.48    0.67
  -6  -6   8    5.70    0.72
  -6   6   8    5.24    0.77
   6  -6 -10    2.20    0.46
  -6  -6  10    2.79    0.55
  -6   6  10    2.83    0.60
   6  -6 -12    4.68    0.64
  -6  -6  12    5.37    0.75
  -6   6  12    7.03    0.88
   6  -6 -14    0.38    0.28
  -6  -6  14    0.57    0.38
  -6   6  14    0.47    0.38
  -6  -6  16    2.66    0.60
  -6   6  16    2.26    0.58
  -6  -6  18    0.44    0.36
  -6   6  18    0.56    0.40
  -6  -6  20    0.79    0.44
  -6   6  20    0.50    0.44
  -6  -6  22    1.55    0.55
  -6   6  22    1.03    0.52
  -6  -6  24    2.43    0.66
  -6   6  24    3.81    0.75
  -6   6  26    1.46    0.58
   6   7  19    0.30    0.50
   6  -7  17    0.08    0.42
   6   7  17    0.21    0.49
   6  -7  15    1.03    0.50
   6   7  15    2.17    0.66
   6  -7  13    0.78    0.44
   6   7  13    0.25    0.46
   6  -7  11    1.82    0.55
   6   7  11    0.89    0.49
   6  -7   9    1.04    0.43
   6   7   9    0.32    0.41
   6  -7   7   -0.16    0.30
   6   7   7    0.11    0.34
   6  -7   5    0.96    0.43
   6   7   5    1.12    0.50
   6  -7   3    0.47    0.34
   6   7   3    0.28    0.38
  -6   7  -3    0.90    0.46
   6  -7   1    0.38    0.32
  -6   7  -1   -0.14    0.32
   6   7   1    0.22    0.35
   6  -7  -1    0.38    0.33
   6   7  -1    0.58    0.37
  -6   7   1    0.69    0.43
  -6  -7   3    0.42    0.34
   6  -7  -3    0.31    0.32
  -6   7   3    0.64    0.40
   6   7  -3    0.68    0.40
  -6  -7   5    0.02    0.29
   6  -7  -5    0.54    0.34
   6   7  -5    0.07    0.33
  -6   7   5    0.38    0.40
  -6  -7   7   -0.34    0.26
   6  -7  -7    0.31    0.30
  -6   7   7    0.10    0.36
  -6  -7   9    1.37    0.48
   6  -7  -9    1.43    0.42
  -6   7   9    1.76    0.54
  -6  -7  11    2.32    0.55
   6  -7 -11    1.17    0.41
  -6   7  11    1.16    0.51
  -6  -7  13    2.90    0.64
   6  -7 -13    4.19    0.62
  -6   7  13    3.21    0.71
  -6  -7  15    4.72    0.82
  -6   7  15    5.70    0.89
  -6  -7  17    4.06    0.78
  -6   7  17    2.63    0.68
  -6  -7  19    6.12    0.96
  -6   7  19    6.38    0.97
  -6   7  23    1.25    0.60
   6   8  14    0.55    0.56
   6   8  12   -0.12    0.50
   6   8  10   -0.16    0.45
   6  -8   8    1.26    0.53
   6   8   8    0.47    0.49
   6  -8   6    0.74    0.50
   6   8   6    1.00    0.51
   6  -8   4    2.06    0.57
   6   8   4    2.77    0.72
   6  -8   2    0.57    0.41
   6   8   2    0.37    0.47
  -6   8  -2    0.19    0.48
   6  -8   0    1.61    0.49
  -6   8   0    2.27    0.65
   6   8   0    1.08    0.50
   6  -8  -2    1.54    0.50
   6   8  -2    1.35    0.52
  -6   8   2    1.05    0.58
   6  -8  -4    3.24    0.65
  -6   8   4    4.00    0.79
  -6  -8   6    2.29    0.61
   6  -8  -6    1.17    0.45
  -6   8   6    1.16    0.53
  -6  -8   8    1.90    0.54
   6  -8  -8    1.90    0.54
  -6   8   8    1.80    0.62
  -6  -8  10    2.81    0.68
  -6   8  10    1.75    0.62
  -6  -8  12    0.41    0.46
  -6   8  12   -0.12    0.45
  -6   8  14   -0.11    0.41
  -6   8  16    0.19    0.48
   7   0  33    0.64    0.51
   7   0  31    9.49    1.19
   7   0  29   17.89    1.46
   7   0  27   10.21    1.12
   7   0  25    7.71    0.95
   7   0  23   21.57    1.47
   7   0  21    6.74    0.81
   7   0  19   10.82    0.88
   7   0  17   18.04    1.17
   7   0  15    3.22    0.47
   7   0  13    2.67    0.40
   7   0  13    2.67    0.27
   7   0  11   10.03    0.72
   7   0  11   11.34    0.59
   7   0   9  132.38    5.59
   7   0   7    9.77    0.52
   7   0   7   10.20    0.64
   7   0   5    7.99    0.45
   7   0   5    8.49    0.54
   7   0   3   17.38    0.91
   7   0   3   16.87    0.82
   7   0   1    0.94    0.18
   7   0   1    1.38    0.19
   7   0  -1   22.90    1.11
   7   0  -1   21.97    1.07
   7   0  -3   24.25    1.17
   7   0  -5  101.17    4.37
   7   0  -7   17.20    0.92
   7   0  -9  142.86    6.15
   7   0 -11   89.52    3.97
   7   0 -13   83.81    3.76
  -7   0  15   20.09    1.17
   7   0 -15   20.29    1.15
  -7   0  17    3.14    0.47
   7   0 -17    3.37    0.47
   7   0 -19   -0.03    0.19
  -7   0  19   -0.04    0.19
  -7   0  21   18.55    1.23
   7   0 -21   19.68    1.20
   7   0 -23   32.13    1.71
  -7   0  23   28.65    1.76
  -7   0  25    4.55    0.69
   7   0 -25    3.81    0.58
  -7   0  27    8.17    0.93
   7   0 -27    6.78    0.78
   7   0 -29    1.17    0.42
  -7   0  29    2.07    0.55
   7   0 -31   -0.15    0.33
  -7   0  31    0.16    0.39
  -7   0  33    0.38    0.43
  -7   0  35    0.94    0.54
   7  -1  32   -0.10    0.44
   7   1  32    0.26    0.45
   7  -1  30   -0.28    0.42
   7   1  30    0.03    0.42
   7  -1  28    0.22    0.41
   7   1  28    0.56    0.46
   7  -1  26    2.59    0.60
   7   1  26    2.31    0.61
   7  -1  24    2.44    0.55
   7   1  24    2.22    0.54
   7  -1  22    1.95    0.48
   7   1  22    1.87    0.50
   7  -1  20    9.05    0.96
   7   1  20   15.00    1.04
   7  -1  18   26.35    1.54
   7   1  18   25.79    1.55
   7  -1  16   36.70    1.76
   7  -1  16   37.06    1.95
   7   1  16   35.38    1.93
   7  -1  14   59.80    2.97
   7  -1  14   63.79    2.82
   7   1  14   63.15    3.00
   7  -1  12   68.52    3.21
   7  -1  12   67.49    3.06
   7   1  12   70.38    3.22
   7  -1  10   83.19    3.90
   7  -1  10   89.53    3.78
   7   1  10   86.48    3.93
   7  -1   8  121.54    5.41
   7  -1   8  120.79    5.28
   7   1   8  123.46    5.12
   7   1   8  127.23    5.43
   7  -1   6   70.22    3.21
   7  -1   6   69.31    3.13
   7   1   6   72.29    3.01
   7   1   6   74.50    3.25
   7  -1   4   53.95    2.32
   7  -1   4   53.72    2.37
   7   1   4   49.32    2.37
   7   1   4   50.94    2.22
   7  -1   2   11.96    0.71
   7  -1   2   12.88    0.71
   7   1   2   13.95    0.65
   7   1   2   13.30    0.74
   7  -1   0    2.71    0.27
   7  -1   0    2.94    0.29
   7   1   0    2.01    0.22
   7   1   0    1.82    0.25
   7  -1  -2   48.90    2.23
   7   1  -2   49.89    2.20
   7   1  -4   19.92    1.01
   7  -1  -6   87.89    3.90
   7   1  -6   90.48    3.90
   7  -1  -8   73.80    3.26
   7   1  -8   72.25    3.25
   7  -1 -10   61.05    2.74
   7   1 -10   58.88    2.74
   7  -1 -12   53.61    2.60
   7   1 -12   59.28    2.64
   7  -1 -14   54.21    2.44
   7   1 -14   49.07    2.44
   7  -1 -16   55.40    2.58
   7   1 -16   53.50    2.59
  -7   1  16   53.74    2.61
   7  -1 -18   22.38    1.30
  -7  -1  18   25.05    1.39
   7   1 -18   23.98    1.35
  -7   1  18   22.49    1.34
   7  -1 -20   23.50    1.32
  -7  -1  20   24.41    1.42
  -7   1  20   20.23    1.32
   7   1 -20   22.31    1.33
  -7  -1  22   25.22    1.53
   7  -1 -22   25.02    1.43
   7   1 -22   24.76    1.46
  -7   1  22   23.99    1.49
   7  -1 -24   42.63    2.14
  -7  -1  24   38.92    2.22
   7   1 -24   39.80    2.14
  -7   1  24   40.31    2.21
   7  -1 -26    0.27    0.30
  -7  -1  26   -0.22    0.29
  -7   1  26    0.64    0.35
   7   1 -26    0.14    0.28
   7  -1 -28    3.52    0.57
  -7  -1  28    4.74    0.75
  -7   1  28    4.75    0.72
   7   1 -28    3.40    0.58
  -7  -1  30    2.06    0.55
   7   1 -30    1.99    0.49
  -7   1  30    2.08    0.56
  -7  -1  32    0.96    0.49
   7   1 -32   -0.25    0.32
  -7   1  32    0.02    0.41
  -7  -1  34    1.29    0.55
  -7   1  34    0.53    0.47
  -7  -1  36    1.38    0.57
  -7   1  36    0.90    0.55
   7  -2  31    2.56    0.70
   7   2  31    2.55    0.71
   7  -2  29    6.81    0.99
   7   2  29    5.83    0.91
   7  -2  27   11.19    1.19
   7   2  27    9.89    1.13
   7  -2  25   13.05    1.13
   7   2  25   13.73    1.17
   7  -2  23    9.95    1.03
   7   2  23   10.50    1.07
   7  -2  21    9.68    0.99
   7   2  21   10.46    0.90
   7   2  21   10.02    0.87
   7  -2  19   14.20    1.07
   7  -2  19   15.49    0.98
   7   2  19   14.95    1.05
   7   2  19   14.84    1.09
   7  -2  17    4.48    0.60
   7  -2  17    3.74    0.48
   7   2  17    4.68    0.59
   7  -2  15    5.71    0.63
   7  -2  15    6.49    0.55
   7   2  15    5.80    0.65
   7  -2  13    4.73    0.54
   7  -2  13    4.37    0.49
   7   2  13    4.46    0.52
   7  -2  11    5.82    0.57
   7  -2  11    6.29    0.50
   7   2  11    5.12    0.54
   7  -2   9   12.32    0.78
   7  -2   9   12.05    0.78
   7   2   9   14.91    0.84
   7  -2   7   16.28    0.89
   7  -2   7   15.69    0.90
   7   2   7   16.15    0.92
   7  -2   5   45.51    2.15
   7  -2   5   46.09    2.14
   7   2   5   46.93    1.98
   7   2   5   46.44    2.17
   7  -2   3   66.91    2.76
   7  -2   3   64.23    2.79
   7   2   3   57.46    2.79
   7   2   3   58.06    2.64
   7  -2   1   28.70    1.20
   7  -2   1   29.69    1.28
   7   2   1   20.50    1.14
   7   2   1   21.30    1.22
  -7  -2   1   88.14    3.86
   7  -2  -1   86.79    3.86
   7  -2  -1   88.47    3.91
   7   2  -1   92.32    3.94
  -7  -2   3   63.58    2.82
   7  -2  -3   61.79    2.76
   7  -2  -3   62.61    2.83
   7  -2  -5   53.70    2.43
  -7  -2   5   51.68    2.44
  -7  -2   7   50.60    2.36
   7  -2  -7   48.65    2.31
   7  -2  -9   54.16    2.48
  -7  -2   9   52.52    2.53
  -7   2   9   52.93    2.61
   7  -2 -11   40.23    1.96
  -7  -2  11   41.58    2.04
  -7   2  11   39.57    2.06
  -7  -2  13   13.72    0.94
   7  -2 -13   14.65    0.90
  -7   2  13   15.22    0.93
  -7  -2  15    3.78    0.51
   7  -2 -15    3.94    0.48
  -7   2  15    2.69    0.40
  -7   2  15    3.61    0.48
   7  -2 -17    1.94    0.36
  -7  -2  17    1.71    0.40
   7   2 -17    2.49    0.43
  -7   2  17    1.54    0.34
  -7   2  17    1.79    0.36
   7  -2 -19    0.56    0.26
  -7   2  19    0.26    0.24
   7   2 -19    0.58    0.27
  -7   2  19    0.40    0.26
   7  -2 -21    1.97    0.40
  -7  -2  21    2.53    0.49
  -7   2  21    2.44    0.44
   7   2 -21    3.44    0.53
  -7   2  21    2.60    0.47
  -7  -2  23    0.61    0.33
   7  -2 -23    1.01    0.35
   7   2 -23    2.00    0.45
  -7   2  23    1.64    0.43
   7  -2 -25    0.42    0.28
  -7  -2  25    0.71    0.37
   7   2 -25    0.76    0.34
  -7   2  25    1.42    0.45
   7  -2 -27    3.77    0.58
  -7  -2  27    4.00    0.70
   7   2 -27    3.50    0.60
  -7   2  27    2.92    0.59
  -7  -2  29    3.34    0.65
  -7   2  29    2.44    0.58
   7   2 -29    3.50    0.61
  -7  -2  31    4.54    0.79
   7   2 -31    4.22    0.69
  -7   2  31    4.27    0.76
  -7  -2  33    1.10    0.51
  -7   2  33    1.72    0.59
   7   2 -33    1.06    0.46
  -7  -2  35   -0.02    0.39
   7   2 -35    0.47    0.41
  -7   2  35    0.61    0.48
   7  -3  30   -0.01    0.44
   7   3  30   -0.41    0.41
   7  -3  28    0.74    0.49
   7   3  28    0.87    0.51
   7  -3  26    0.75    0.43
   7   3  26    0.22    0.42
   7  -3  24    5.29    0.77
   7   3  24    4.80    0.76
   7   3  24    6.18    0.81
   7  -3  22   12.92    1.06
   7   3  22   12.37    1.06
   7   3  22   14.09    1.09
   7  -3  20   23.82    1.42
   7  -3  20   21.98    1.45
   7   3  20   24.42    1.50
   7   3  20   23.52    1.54
   7  -3  18   11.93    0.92
   7  -3  18   11.94    0.89
   7   3  18   11.69    0.96
   7   3  18   11.25    0.92
   7  -3  16   29.18    1.59
   7  -3  16   24.76    1.58
   7   3  16   30.29    1.65
   7   3  16   30.98    1.75
   7  -3  14    9.55    0.76
   7  -3  14    9.17    0.73
   7   3  14    9.44    0.82
   7   3  14    9.63    0.75
   7  -3  12   43.92    2.18
   7  -3  12   42.89    2.16
   7   3  12   44.02    2.35
   7   3  12   44.12    2.19
   7  -3  10   38.68    1.94
   7  -3  10   37.54    1.89
   7   3  10   38.91    1.93
   7  -3   8   52.98    2.45
   7  -3   8   52.47    2.39
   7   3   8   47.89    2.41
   7  -3   6   51.27    2.43
   7  -3   6   56.31    2.54
   7   3   6   52.99    2.50
   7  -3   4   35.78    1.64
  -7  -3  -4   35.53    1.60
   7  -3   4   32.24    1.72
   7   3   4   35.56    1.70
  -7  -3  -2   27.09    1.30
   7  -3   2   26.88    1.27
   7   3   2   26.26    1.35
  -7  -3   0    1.84    0.28
   7  -3   0    1.78    0.30
   7  -3   0    1.49    0.20
   7   3   0    1.67    0.27
   7  -3  -2    7.47    0.44
  -7  -3   2    8.13    0.57
   7  -3  -2    6.61    0.55
   7   3  -2    8.49    0.55
  -7  -3   4    1.37    0.28
   7  -3  -4    1.76    0.31
   7  -3  -4    2.04    0.22
  -7   3   4    2.76    0.41
  -7  -3   6   12.44    0.81
   7  -3  -6   11.63    0.77
  -7   3   6   11.76    0.82
  -7  -3   8   26.84    1.45
   7  -3  -8   26.54    1.39
  -7   3   8   25.57    1.48
   7  -3 -10   30.58    1.56
  -7  -3  10   30.41    1.62
  -7   3  10   28.67    1.65
   7  -3 -12   60.40    2.82
  -7  -3  12   61.10    2.92
  -7   3  12   58.55    2.99
  -7  -3  14   23.65    1.41
   7  -3 -14   26.63    1.34
  -7   3  14   19.69    1.35
   7  -3 -16   35.40    1.84
  -7  -3  16   35.00    1.97
  -7   3  16   37.20    1.99
  -7  -3  18   13.07    1.02
   7  -3 -18   14.44    0.95
  -7   3  18   14.56    0.95
  -7   3  18   12.16    0.96
  -7  -3  20   26.20    1.66
   7  -3 -20   28.78    1.56
  -7   3  20   28.83    1.58
  -7   3  20   27.04    1.63
  -7  -3  22    1.36    0.45
   7  -3 -22    2.17    0.43
  -7   3  22    2.76    0.51
  -7   3  22    3.16    0.53
   7  -3 -24    4.00    0.57
  -7  -3  24    2.79    0.59
  -7   3  24    3.18    0.58
  -7   3  26    6.20    0.79
   7   3 -26    5.25    0.75
  -7   3  28    2.14    0.55
   7   3 -28    1.86    0.49
   7   3 -30    0.42    0.38
  -7   3  30    0.08    0.40
  -7   3  32    0.18    0.46
   7   3 -32   -0.04    0.38
  -7   3  34    0.34    0.48
   7  -4  29    5.51    0.89
   7   4  29    4.50    0.84
   7  -4  27    5.55    0.90
   7   4  27    5.37    0.85
   7  -4  25   11.03    1.13
   7   4  25   10.84    1.17
   7   4  25   10.55    1.14
   7  -4  23    4.63    0.71
   7  -4  23    4.15    0.68
   7   4  23    3.88    0.72
   7   4  23    4.29    0.72
   7  -4  21    4.66    0.68
   7  -4  21    4.07    0.64
   7   4  21    3.79    0.68
   7   4  21    3.40    0.62
   7  -4  19    1.36    0.41
   7  -4  19    1.50    0.42
   7   4  19    1.01    0.43
   7   4  19    0.83    0.38
   7  -4  17    4.43    0.59
   7  -4  17    4.41    0.61
   7   4  17    4.40    0.62
   7   4  17    3.90    0.65
   7  -4  15    0.55    0.31
   7   4  15    0.76    0.31
   7   4  15    0.88    0.38
   7  -4  13    3.85    0.56
   7   4  13    4.43    0.53
   7   4  13    3.15    0.59
   7  -4  11    9.53    0.78
   7   4  11    9.43    0.71
   7   4  11    9.73    0.86
   7  -4   9   13.14    0.90
   7   4   9   11.03    0.80
   7   4   9   13.54    1.01
   7  -4   7    9.65    0.76
   7   4   7   10.35    0.69
   7   4   7   10.07    0.86
   7  -4   5   21.17    1.22
   7   4   5   20.38    1.31
   7   4   5   20.04    1.11
  -7  -4  -3   36.12    1.66
   7  -4   3   32.65    1.77
   7   4   3   34.05    1.67
   7   4   3   33.31    1.90
   7  -4   1   49.90    2.45
  -7  -4  -1   51.46    2.36
   7   4   1   48.23    2.59
   7   4   1   51.75    2.36
  -7  -4   1   57.78    2.77
   7  -4  -1   57.09    2.82
   7   4  -1   59.46    2.74
   7   4  -1   61.99    3.00
  -7   4   1   62.57    3.00
   7  -4  -3   42.04    2.00
  -7  -4   3   41.71    1.97
   7   4  -3   38.50    2.07
  -7   4   3   38.94    2.09
   7   4  -3   36.13    1.88
   7  -4  -5   38.55    1.96
  -7  -4   5   39.01    1.97
   7   4  -5   39.74    2.04
  -7   4   5   38.41    2.10
   7  -4  -7   19.70    1.15
  -7  -4   7   19.64    1.18
  -7   4   7   18.60    1.24
   7   4  -7   19.73    1.15
  -7  -4   9   24.66    1.46
   7  -4  -9   24.21    1.39
   7   4  -9   26.73    1.40
  -7   4   9   25.39    1.53
  -7  -4  11   13.48    0.98
   7  -4 -11   14.92    0.94
  -7   4  11   11.45    0.95
  -7  -4  13    8.31    0.85
   7  -4 -13    8.44    0.68
  -7   4  13    8.27    0.86
   7  -4 -15    6.40    0.66
  -7  -4  15    5.71    0.72
  -7   4  15    3.90    0.62
  -7  -4  17    1.53    0.42
   7  -4 -17    1.12    0.33
  -7   4  17    0.80    0.34
   7  -4 -19    1.10    0.35
  -7  -4  19    1.30    0.43
  -7   4  19    1.95    0.47
   7  -4 -21    1.24    0.37
  -7  -4  21    1.17    0.45
  -7   4  21    1.42    0.41
  -7  -4  23    0.80    0.42
  -7   4  23    0.37    0.36
  -7  -4  25    0.59    0.40
  -7   4  25    0.50    0.37
  -7  -4  27    1.97    0.57
  -7  -4  29    0.09    0.41
   7   4 -29    0.69    0.40
   7   5  26    0.05    0.42
   7  -5  24   -0.52    0.37
   7   5  24    1.28    0.53
   7  -5  22    2.20    0.56
   7   5  22    2.74    0.68
   7  -5  20    4.94    0.76
   7   5  20    4.05    0.75
   7  -5  18   13.28    1.09
   7   5  18   12.93    1.31
   7  -5  16    8.54    0.93
   7   5  16   11.41    1.17
   7  -5  14   22.40    1.45
   7   5  14   21.96    1.55
   7  -5  12   35.29    2.03
   7   5  12   38.86    2.24
   7  -5  10    5.89    0.71
   7   5  10    6.66    0.84
   7  -5   8   26.47    1.60
   7   5   8   28.32    1.75
   7  -5   6   14.69    1.05
   7   5   6   16.83    1.20
   7  -5   4    5.45    0.65
   7   5   4    5.20    0.71
   7  -5   2    2.11    0.41
   7   5   2    1.99    0.44
  -7  -5   0    1.83    0.36
   7  -5   0    1.79    0.38
   7   5   0    2.77    0.49
  -7   5   0    2.56    0.48
   7  -5  -2    0.60    0.27
  -7  -5   2    0.38    0.24
   7   5  -2    0.63    0.29
  -7   5   2    0.40    0.30
   7  -5  -4    2.70    0.46
  -7  -5   4    3.18    0.47
  -7   5   4    3.34    0.56
   7   5  -4    3.31    0.52
   7  -5  -6    2.56    0.44
  -7  -5   6    3.49    0.52
  -7   5   6    2.90    0.53
   7   5  -6    3.35    0.49
  -7  -5   8    8.80    0.84
   7  -5  -8    7.13    0.72
   7   5  -8    6.80    0.69
  -7   5   8    6.46    0.79
   7  -5 -10    6.28    0.69
  -7  -5  10    8.00    0.83
  -7   5  10    5.47    0.75
  -7  -5  12   13.52    1.04
   7  -5 -12   14.47    0.98
  -7   5  12   13.51    1.07
   7  -5 -14    5.09    0.62
  -7  -5  14    5.40    0.75
  -7   5  14    6.71    0.83
  -7  -5  16    3.21    0.60
   7  -5 -16    2.91    0.48
  -7   5  16    2.41    0.54
   7  -5 -18    9.94    0.82
  -7  -5  18   10.29    1.06
  -7   5  18    7.60    0.93
  -7  -5  20    7.65    0.95
  -7   5  20    8.22    0.97
  -7  -5  22    4.94    0.77
  -7   5  22    4.28    0.73
  -7  -5  24    5.99    0.89
  -7   5  24    5.69    0.83
  -7  -5  26    1.85    0.59
  -7   5  26    0.70    0.45
  -7  -5  28    2.05    0.63
   7  -6  23    0.89    0.49
   7   6  23    0.64    0.52
   7  -6  21    1.15    0.52
   7   6  21    0.91    0.52
   7  -6  19    1.82    0.54
   7   6  19    0.61    0.48
   7  -6  17    1.33    0.48
   7   6  17    0.87    0.51
   7  -6  15    1.06    0.44
   7   6  15    1.27    0.53
   7  -6  13    0.54    0.35
   7   6  13    0.31    0.41
   7  -6  11    1.25    0.43
   7   6  11    0.72    0.43
   7  -6   9    6.92    0.80
   7   6   9    5.58    0.84
   7  -6   7    5.44    0.72
   7   6   7    5.04    0.80
   7  -6   5   10.95    0.93
   7   6   5   12.04    1.19
   7  -6   3    5.80    0.74
   7   6   3    6.97    0.86
   7  -6   1   10.06    0.95
  -7   6  -1    8.97    0.96
   7   6   1    8.84    0.96
   7  -6  -1   23.72    1.42
  -7  -6   1   23.65    1.37
   7   6  -1   18.69    1.44
  -7   6   1   23.77    1.50
   7  -6  -3   15.51    1.13
  -7  -6   3   17.90    1.15
  -7   6   3   16.04    1.24
   7   6  -3   15.77    1.18
  -7  -6   5   15.86    1.10
   7  -6  -5   12.97    1.01
   7   6  -5   14.00    1.08
  -7   6   5   17.19    1.21
   7  -6  -7   12.37    0.92
  -7  -6   7   12.77    0.96
   7   6  -7   10.46    0.89
  -7   6   7   10.82    1.00
  -7  -6   9   11.24    0.94
   7  -6  -9   10.90    0.88
  -7   6   9   10.02    1.07
  -7  -6  11    1.10    0.41
   7  -6 -11    1.22    0.37
  -7   6  11   -0.08    0.31
   7  -6 -13    1.87    0.43
  -7  -6  13    1.57    0.47
  -7   6  13    2.21    0.55
  -7  -6  15    3.07    0.63
   7  -6 -15    2.52    0.50
  -7   6  15    2.72    0.60
  -7  -6  17    0.68    0.41
  -7   6  17    0.07    0.39
  -7  -6  19    0.01    0.33
  -7   6  19    0.42    0.40
  -7  -6  21    0.44    0.43
  -7   6  21    0.03    0.39
  -7  -6  23    1.79    0.57
  -7   6  23    1.14    0.55
  -7   6  25    0.38    0.44
  -7   6  27    1.18    0.56
   7   7  18    1.58    0.63
   7  -7  16    7.27    1.01
   7   7  16    4.88    0.93
   7  -7  14    3.53    0.71
   7   7  14    3.67    0.79
   7  -7  12    3.57    0.72
   7   7  12    4.32    0.84
   7  -7  10    6.65    0.89
   7   7  10    7.23    1.03
   7  -7   8    2.61    0.58
   7   7   8    2.15    0.64
   7  -7   6    1.90    0.51
   7   7   6    2.99    0.67
   7  -7   4    3.69    0.66
   7   7   4    4.68    0.77
   7  -7   2    2.40    0.54
   7   7   2    1.91    0.55
   7  -7   0    0.56    0.33
  -7   7   0    0.94    0.44
   7   7   0    0.33    0.37
   7  -7  -2    0.75    0.37
  -7   7   2    1.11    0.48
   7   7  -2    0.52    0.37
  -7  -7   4    0.70    0.36
   7  -7  -4    0.26    0.34
  -7   7   4    0.27    0.40
   7   7  -4    0.10    0.35
  -7  -7   6    1.21    0.44
   7  -7  -6    1.86    0.47
  -7   7   6    1.33    0.50
   7  -7  -8    0.39    0.31
  -7  -7   8    0.47    0.37
  -7   7   8    0.83    0.44
  -7  -7  10    2.86    0.62
   7  -7 -10    3.03    0.56
  -7   7  10    2.84    0.65
   7  -7 -12    2.54    0.53
  -7  -7  12    1.69    0.56
  -7   7  12    2.88    0.69
   7  -7 -14    4.30    0.65
  -7  -7  14    3.28    0.70
  -7   7  14    4.25    0.79
  -7  -7  16    4.29    0.79
  -7   7  16    3.43    0.73
  -7  -7  18    2.00    0.61
  -7   7  18    3.04    0.69
  -7   7  20    0.90    0.54
  -7   7  22    1.31    0.55
   7   8  13    0.03    0.52
   7   8  11    0.11    0.49
   7   8   9    0.32    0.53
   7  -8   7    1.21    0.52
   7   8   7    0.72    0.53
   7  -8   5    3.28    0.72
   7   8   5    3.23    0.76
   7  -8   3    5.62    0.82
   7   8   3    4.43    0.85
   7  -8   1    3.06    0.65
   7   8   1    4.74    0.83
   7  -8  -1    6.26    0.84
   7   8  -1    4.76    0.84
  -7   8   1    4.53    0.82
   7  -8  -3    5.91    0.82
   7   8  -3    4.99    0.84
  -7   8   3    4.86    0.88
   7  -8  -5    3.00    0.62
  -7   8   5    4.31    0.83
   7  -8  -7    1.51    0.48
  -7  -8   7    1.45    0.55
  -7   8   7    2.43    0.69
  -7  -8   9    2.16    0.60
   7  -8  -9    1.46    0.50
  -7   8   9    1.56    0.61
  -7  -8  11    1.03    0.51
   7  -8 -11    0.69    0.44
  -7   8  11    1.20    0.59
  -7  -8  13    0.12    0.45
  -7   8  13    0.11    0.50
  -7   8  15   -0.12    0.43
   8   0  32    0.87    0.54
   8   0  30    2.26    0.68
   8   0  28   -0.35    0.39
   8   0  26   -0.30    0.33
   8   0  24    0.24    0.36
   8   0  22   -0.05    0.31
   8   0  20   -0.09    0.28
   8   0  18    4.00    0.58
   8   0  16    0.09    0.23
   8   0  14    0.23    0.21
   8   0  12   18.82    0.91
   8   0  12   17.86    1.10
   8   0  10    0.93    0.26
   8   0  10    0.71    0.15
   8   0   8    1.12    0.17
   8   0   8    0.88    0.23
   8   0   6    4.38    0.44
   8   0   6    4.76    0.33
   8   0   4    0.51    0.17
   8   0   4    0.67    0.14
   8   0   2    0.20    0.12
   8   0   2    0.36    0.14
   8   0   0    2.82    0.28
   8   0   0    2.69    0.31
   8   0  -2    7.04    0.46
   8   0  -4    2.98    0.32
   8   0  -6   10.17    0.63
   8   0  -8   40.54    1.92
   8   0 -10   20.73    1.13
   8   0 -12    2.04    0.34
   8   0 -14   23.87    1.31
   8   0 -16   28.21    1.52
   8   0 -18    2.91    0.45
  -8   0  20    0.47    0.27
   8   0 -20    0.64    0.28
  -8   0  22    4.05    0.61
   8   0 -22    2.58    0.47
  -8   0  24   11.81    1.00
   8   0 -24   14.27    1.01
   8   0 -26   35.21    1.96
  -8   0  26   35.32    2.04
   8   0 -28    4.91    0.69
  -8   0  28    3.62    0.67
  -8   0  30    2.95    0.65
   8   0 -30    2.82    0.58
   8   0 -32    2.90    0.59
  -8   0  32    2.80    0.64
  -8   0  34    4.75    0.83
  -8   0  36    1.84    0.62
   8  -1  31   -0.02    0.49
   8   1  31   -0.23    0.44
   8  -1  29    0.05    0.42
   8   1  29    0.22    0.43
   8  -1  27    0.28    0.42
   8   1  27    0.72    0.46
   8  -1  25    1.11    0.46
   8   1  25    0.38    0.42
   8  -1  23    0.26    0.33
   8   1  23    0.24    0.32
   8  -1  21    2.15    0.49
   8   1  21    2.36    0.51
   8  -1  19    3.26    0.54
   8   1  19    3.89    0.60
   8  -1  17    3.23    0.52
   8   1  17    2.80    0.49
   8  -1  15    1.89    0.40
   8  -1  15    1.50    0.29
   8   1  15    1.42    0.37
   8  -1  13    0.86    0.29
   8  -1  13    0.57    0.20
   8   1  13    0.42    0.24
   8  -1  11    7.85    0.61
   8  -1  11    7.30    0.51
   8   1  11    7.64    0.62
   8  -1   9    8.69    0.56
   8  -1   9    9.07    0.65
   8   1   9    9.01    0.42
   8   1   9    9.03    0.66
   8  -1   7   11.10    0.70
   8  -1   7   10.04    0.62
   8   1   7   11.31    0.52
   8   1   7    9.64    0.68
   8  -1   5    0.62    0.17
   8  -1   5    0.54    0.18
   8   1   5    0.89    0.13
   8   1   5    0.64    0.20
   8  -1   3    9.78    0.59
   8  -1   3    8.86    0.56
   8   1   3    9.38    0.50
   8   1   3    9.36    0.61
   8  -1   1    9.57    0.57
   8  -1   1    8.58    0.57
   8   1   1    9.08    0.51
   8   1   1    9.84    0.61
   8  -1  -1    1.45    0.22
   8  -1  -1    1.42    0.24
   8   1  -1    1.52    0.22
   8   1  -1    1.52    0.25
   8  -1  -3   16.04    0.85
   8   1  -3   14.62    0.80
   8  -1  -5   23.37    1.17
   8   1  -5   22.08    1.14
   8  -1  -7    6.48    0.49
   8   1  -7    6.46    0.50
   8  -1  -9   37.04    1.74
   8   1  -9   33.64    1.72
   8  -1 -11   44.99    2.13
   8   1 -11   43.97    2.14
   8  -1 -13   21.58    1.21
   8   1 -13   22.30    1.23
   8  -1 -15    0.63    0.23
   8   1 -15    1.22    0.31
   8  -1 -17   13.70    0.93
   8   1 -17   15.09    0.97
   8  -1 -19   30.70    1.81
   8   1 -19   36.99    1.90
  -8   1  19   39.72    1.93
  -8  -1  21   22.99    1.36
   8  -1 -21   17.44    1.22
  -8   1  21   22.67    1.33
   8   1 -21   20.62    1.29
   8  -1 -23    6.72    0.73
  -8  -1  23    6.31    0.77
   8   1 -23    5.52    0.70
  -8   1  23    5.61    0.71
  -8  -1  25    4.88    0.72
   8  -1 -25    6.04    0.68
  -8   1  25    5.27    0.71
   8   1 -25    4.37    0.63
  -8  -1  27    5.53    0.80
   8  -1 -27    5.30    0.68
  -8   1  27    6.09    0.80
   8   1 -27    5.50    0.74
  -8  -1  29    3.30    0.64
   8  -1 -29    4.44    0.64
  -8   1  29    3.25    0.65
   8   1 -29    2.63    0.56
  -8  -1  31    1.26    0.51
  -8   1  31    2.09    0.59
   8   1 -31    2.52    0.57
  -8  -1  33    1.27    0.52
   8   1 -33    2.90    0.59
  -8   1  33    0.70    0.49
  -8  -1  35    0.35    0.44
  -8   1  35    0.86    0.54
   8  -2  30    0.47    0.52
   8   2  30    1.01    0.54
   8  -2  28    1.93    0.61
   8   2  28    2.42    0.64
   8  -2  26    2.11    0.60
   8   2  26    2.58    0.65
   8  -2  24    0.74    0.45
   8   2  24    2.98    0.61
   8  -2  22    1.13    0.43
   8   2  22    1.64    0.50
   8   2  22    1.85    0.47
   8  -2  20    3.73    0.60
   8   2  20    3.09    0.58
   8   2  20    3.50    0.56
   8  -2  18    1.04    0.35
   8  -2  18    0.36    0.24
   8   2  18    0.70    0.35
   8  -2  16    7.08    0.59
   8  -2  16    6.48    0.71
   8   2  16    7.37    0.76
   8  -2  14    1.23    0.30
   8  -2  14    1.71    0.38
   8   2  14    1.38    0.35
   8  -2  12    2.32    0.35
   8  -2  12    1.81    0.35
   8   2  12    2.71    0.41
   8  -2  10    0.42    0.21
   8  -2  10    0.46    0.20
   8   2  10    0.65    0.23
   8  -2   8    1.57    0.27
   8  -2   8    1.44    0.27
   8   2   8    1.99    0.33
   8  -2   6    2.85    0.35
   8  -2   6    3.33    0.38
   8   2   6    2.14    0.33
   8   2   6    2.93    0.19
   8  -2   4   17.37    1.01
   8  -2   4   18.72    0.99
   8   2   4   19.69    1.05
   8   2   4   19.38    0.88
   8  -2   2   35.55    1.75
   8  -2   2   36.75    1.72
   8   2   2   37.76    1.64
   8   2   2   35.82    1.77
   8  -2   0   24.93    1.25
   8  -2   0   25.33    1.31
   8   2   0   26.84    1.23
   8   2   0   25.73    1.31
   8  -2  -2    7.38    0.47
   8  -2  -2    8.12    0.56
   8   2  -2    7.23    0.50
   8   2  -2    7.41    0.54
   8  -2  -4    2.92    0.35
   8   2  -4    1.32    0.24
   8  -2  -6   47.06    2.20
   8   2  -6   45.59    2.17
   8  -2  -8    3.66    0.42
  -8  -2   8    4.38    0.49
   8   2  -8    4.16    0.46
   8  -2 -10    9.71    0.68
  -8  -2  10   10.54    0.75
   8   2 -10    9.90    0.71
   8  -2 -12   10.91    0.77
  -8  -2  12   11.76    0.82
   8   2 -12   11.10    0.78
   8  -2 -14   37.83    1.86
   8   2 -14   35.11    1.88
   8  -2 -16    0.35    0.22
   8   2 -16    0.23    0.22
   8  -2 -18    0.92    0.30
   8   2 -18    1.49    0.37
  -8   2  18    1.69    0.36
   8  -2 -20    0.54    0.28
  -8   2  20    1.19    0.36
   8   2 -20    0.82    0.32
  -8   2  20    0.69    0.31
   8  -2 -22   12.06    0.89
  -8   2  22    9.52    0.82
   8   2 -22    9.48    0.93
   8  -2 -24    0.30    0.28
  -8   2  24    0.90    0.38
   8   2 -24    1.16    0.37
   8  -2 -26    3.61    0.58
  -8   2  26    4.57    0.67
   8   2 -26    3.94    0.62
   8  -2 -28    7.13    0.81
  -8  -2  28    6.14    0.84
  -8   2  28    5.87    0.80
   8   2 -28    5.57    0.78
  -8  -2  30    8.90    1.04
   8   2 -30    7.77    0.92
  -8   2  30    8.15    0.97
  -8  -2  32    7.73    1.04
   8   2 -32    7.98    0.97
  -8   2  32    9.54    1.08
  -8   2  34   12.40    1.31
   8   2 -34   12.17    1.24
   8  -3  29   -0.04    0.43
   8   3  29   -0.03    0.43
   8  -3  27    0.55    0.47
   8   3  27    0.09    0.39
   8  -3  25    0.10    0.37
   8   3  25    0.37    0.42
   8  -3  23    1.94    0.54
   8   3  23    2.00    0.55
   8   3  23    3.01    0.59
   8  -3  21    0.29    0.35
   8   3  21    0.62    0.37
   8   3  21    0.82    0.43
   8  -3  19    4.14    0.59
   8  -3  19    4.64    0.66
   8   3  19    5.33    0.69
   8   3  19    4.87    0.70
   8  -3  17    2.42    0.47
   8  -3  17    2.14    0.43
   8   3  17    2.75    0.52
   8   3  17    3.54    0.56
   8  -3  15    4.71    0.60
   8  -3  15    5.65    0.63
   8   3  15    5.05    0.62
   8   3  15    4.49    0.64
   8  -3  13    2.48    0.41
   8  -3  13    1.97    0.39
   8   3  13    2.03    0.41
   8  -3  11   11.77    0.80
   8  -3  11   11.05    0.77
   8   3  11    9.83    0.77
   8  -3   9    2.29    0.39
   8  -3   9    4.09    0.45
   8   3   9    3.81    0.46
   8  -3   7    1.42    0.27
   8  -3   7    1.01    0.27
   8   3   7    1.23    0.29
   8  -3   5    3.04    0.34
   8  -3   5    2.71    0.39
   8   3   5    2.77    0.37
   8   3   5    3.26    0.27
   8  -3   3    5.78    0.42
   8  -3   3    4.53    0.51
  -8  -3  -3    5.42    0.40
   8   3   3    5.11    0.50
  -8  -3  -1    0.33    0.17
   8  -3   1    0.73    0.17
   8  -3   1    0.42    0.19
   8   3   1    0.41    0.20
  -8  -3   1   10.45    0.68
   8  -3  -1    9.38    0.69
   8  -3  -1   10.31    0.58
   8   3  -1   10.80    0.68
  -8  -3   3    1.46    0.29
   8  -3  -3    1.59    0.21
   8  -3  -3    0.76    0.24
   8  -3  -5    1.42    0.30
  -8  -3   5    2.04    0.34
  -8  -3   7    6.13    0.62
   8  -3  -7    6.30    0.61
   8  -3  -9   12.64    0.83
  -8  -3   9   13.06    0.89
  -8   3   9   12.40    0.90
  -8  -3  11   14.70    0.99
   8  -3 -11   15.31    0.93
  -8   3  11   12.79    0.95
  -8  -3  13   12.56    0.94
   8  -3 -13   12.83    0.89
  -8   3  13   13.33    0.94
  -8  -3  15    8.70    0.86
   8  -3 -15    8.87    0.70
  -8   3  15    7.63    0.81
  -8  -3  17    3.90    0.59
   8  -3 -17    3.52    0.50
  -8   3  17    3.41    0.53
  -8  -3  19   10.73    0.88
   8  -3 -19    8.83    0.74
  -8   3  19    7.28    0.81
   8  -3 -21    4.98    0.62
  -8  -3  21    4.70    0.68
  -8   3  21    4.62    0.64
  -8   3  21    3.32    0.54
  -8  -3  23   13.10    1.10
   8  -3 -23   14.25    1.04
  -8   3  23   14.07    1.08
  -8   3  23   15.46    1.08
   8   3 -23   15.50    1.12
   8  -3 -25    9.03    0.88
   8   3 -25    7.16    0.88
  -8   3  25    7.48    0.87
  -8   3  27    5.37    0.77
   8   3 -27    5.27    0.77
  -8   3  29    1.90    0.57
   8   3 -29    0.09    0.34
  -8   3  31    1.05    0.50
   8   3 -31   -0.35    0.34
  -8   3  33    0.34    0.47
   8   4  28    0.15    0.45
   8   4  26    1.98    0.60
   8   4  26    0.97    0.53
   8   4  24    1.95    0.59
   8   4  24    1.20    0.52
   8  -4  22    0.43    0.40
   8   4  22    0.26    0.38
   8   4  22    0.48    0.44
   8  -4  20    0.59    0.35
   8   4  20    0.93    0.41
   8   4  20    0.86    0.41
   8  -4  18    0.27    0.31
   8   4  18    0.23    0.33
   8   4  18   -0.11    0.28
   8  -4  16    0.01    0.28
   8   4  16    0.55    0.32
   8   4  16    0.05    0.30
   8  -4  14   -0.06    0.21
   8   4  14    0.09    0.30
   8   4  14   -0.08    0.23
   8  -4  12    1.30    0.36
   8   4  12    1.72    0.37
   8   4  12    2.20    0.48
   8  -4  10    6.86    0.72
   8   4  10    7.23    0.82
   8   4  10    5.41    0.60
   8  -4   8    2.21    0.41
   8   4   8    2.31    0.37
   8   4   8    1.40    0.40
   8  -4   6    1.55    0.36
   8   4   6    2.29    0.36
   8   4   6    2.65    0.47
   8  -4   4    4.37    0.54
   8   4   4    5.17    0.50
   8   4   4    4.56    0.61
  -8  -4  -2    6.05    0.50
   8  -4   2    6.40    0.65
   8   4   2    6.08    0.52
   8   4   2    5.51    0.65
   8  -4   0    1.25    0.32
  -8  -4   0    1.58    0.30
   8   4   0    1.69    0.38
   8   4   0    2.02    0.32
   8  -4  -2    7.86    0.66
  -8  -4   2    7.63    0.61
   8   4  -2    6.83    0.55
   8   4  -2    7.93    0.67
  -8  -4   4   11.38    0.82
   8  -4  -4   13.11    0.86
   8   4  -4   11.59    0.84
  -8   4   4   12.63    0.92
  -8  -4   6    3.35    0.50
   8  -4  -6    3.72    0.50
   8   4  -6    5.10    0.54
  -8   4   6    4.91    0.60
   8  -4  -8    0.56    0.25
  -8  -4   8    0.11    0.21
   8   4  -8    0.44    0.22
  -8   4   8   -0.13    0.22
   8  -4 -10   24.65    1.41
  -8  -4  10   25.22    1.49
   8   4 -10   24.14    1.37
  -8   4  10   26.76    1.55
  -8  -4  12    2.25    0.46
   8  -4 -12    1.83    0.37
  -8   4  12    2.91    0.50
  -8  -4  14    3.75    0.59
   8  -4 -14    3.55    0.51
  -8   4  14    5.00    0.66
   8  -4 -16    0.15    0.24
  -8  -4  16    0.13    0.28
  -8   4  16    0.26    0.30
  -8  -4  18    1.12    0.41
   8  -4 -18    1.56    0.39
  -8   4  18    2.81    0.55
   8  -4 -20    0.28    0.29
  -8  -4  20    0.60    0.38
  -8   4  20    0.42    0.35
   8  -4 -22    3.03    0.55
  -8  -4  22    3.93    0.68
  -8   4  22    3.03    0.58
  -8  -4  24    1.36    0.49
  -8   4  24    1.39    0.45
  -8  -4  26    0.28    0.39
   8   4 -28    3.98    0.71
   8   4 -30    7.50    1.00
   8   5  25    0.28    0.46
   8  -5  23    1.10    0.51
   8   5  23    0.30    0.42
   8  -5  21    0.41    0.36
   8   5  21    1.10    0.52
   8  -5  19    0.89    0.43
   8   5  19    1.57    0.52
   8  -5  17    2.37    0.54
   8   5  17    1.68    0.54
   8  -5  15    3.50    0.60
   8   5  15    3.51    0.68
   8  -5  13    3.93    0.63
   8   5  13    5.89    0.83
   8  -5  11    2.66    0.51
   8   5  11    2.40    0.55
   8  -5   9    0.14    0.26
   8   5   9    0.26    0.31
   8  -5   7    1.55    0.41
   8   5   7    1.82    0.48
   8  -5   5    0.49    0.29
   8   5   5    0.77    0.38
   8  -5   3    1.57    0.37
   8   5   3    1.80    0.45
   8  -5   1    0.37    0.26
   8   5   1    0.51    0.32
  -8  -5   1    2.88    0.44
   8  -5  -1    2.65    0.45
   8   5  -1    1.14    0.37
  -8  -5   3    2.78    0.46
   8  -5  -3    2.26    0.43
   8   5  -3    3.11    0.51
  -8   5   3    3.03    0.55
  -8  -5   5    5.20    0.63
   8  -5  -5    4.63    0.59
  -8   5   5    4.24    0.63
   8   5  -5    5.41    0.63
   8   5  -5    4.48    0.50
  -8  -5   7    4.72    0.62
   8  -5  -7    3.62    0.54
   8   5  -7    4.77    0.58
  -8   5   7    5.03    0.69
   8  -5  -9    3.43    0.52
  -8  -5   9    2.41    0.48
  -8   5   9    3.23    0.57
  -8  -5  11    1.51    0.42
   8  -5 -11    0.65    0.31
  -8   5  11    1.18    0.42
  -8  -5  13    6.10    0.77
   8  -5 -13    4.09    0.58
  -8   5  13    4.70    0.70
  -8  -5  15    6.10    0.81
   8  -5 -15    7.48    0.78
  -8   5  15    6.47    0.82
  -8  -5  17    9.06    1.01
   8  -5 -17   10.73    0.85
  -8   5  17    9.17    1.03
  -8  -5  19    4.64    0.73
   8  -5 -19    3.94    0.58
  -8   5  19    2.52    0.58
  -8  -5  21    2.38    0.58
  -8   5  21    2.16    0.54
  -8  -5  23    7.19    0.95
  -8   5  23    5.59    0.82
  -8  -5  25    2.61    0.67
  -8   5  25    3.45    0.68
  -8  -5  27    0.17    0.44
   8  -6  22   -0.33    0.39
   8   6  22    0.22    0.49
   8  -6  20   -0.36    0.37
   8   6  20    0.44    0.51
   8  -6  18    1.14    0.50
   8   6  18    1.05    0.54
   8  -6  16    0.78    0.42
   8   6  16    0.73    0.49
   8  -6  14    0.01    0.32
   8   6  14    0.13    0.41
   8  -6  12    1.66    0.48
   8   6  12    2.08    0.60
   8  -6  10    0.37    0.35
   8   6  10   -0.03    0.34
   8  -6   8    1.18    0.40
   8   6   8    0.99    0.46
   8  -6   6    1.17    0.39
   8   6   6    0.54    0.37
   8  -6   4    3.16    0.54
   8   6   4    2.17    0.53
   8  -6   2    0.13    0.28
   8   6   2    0.35    0.35
   8  -6   0    4.38    0.63
   8   6   0    4.77    0.72
  -8  -6   2    2.20    0.46
   8  -6  -2    2.30    0.48
   8   6  -2    2.88    0.55
  -8   6   2    3.38    0.63
  -8  -6   4    2.67    0.49
   8  -6  -4    2.61    0.48
   8   6  -4    2.98    0.55
  -8   6   4    3.10    0.61
   8  -6  -6    2.55    0.50
  -8  -6   6    1.78    0.44
  -8   6   6    1.89    0.51
   8   6  -6    1.91    0.46
  -8  -6   8    1.21    0.41
   8  -6  -8    0.88    0.34
  -8   6   8    2.02    0.54
  -8  -6  10    4.04    0.66
   8  -6 -10    4.69    0.64
  -8   6  10    4.22    0.71
   8  -6 -12   -0.10    0.26
  -8  -6  12   -0.09    0.32
  -8   6  12   -0.08    0.34
   8  -6 -14    2.15    0.47
  -8  -6  14    2.22    0.54
  -8   6  14    1.78    0.55
  -8  -6  16    0.70    0.45
   8  -6 -16    1.15    0.38
  -8   6  16    0.67    0.42
  -8  -6  18    1.29    0.53
   8  -6 -18    0.84    0.40
  -8   6  18    0.55    0.44
  -8  -6  20    1.67    0.55
  -8   6  20    1.36    0.52
  -8  -6  22    1.27    0.55
  -8   6  22    2.61    0.64
  -8   6  24    0.19    0.46
  -8   6  26    1.22    0.55
   8   7  17    0.35    0.49
   8  -7  15    1.96    0.61
   8   7  15    2.36    0.67
   8  -7  13    0.59    0.42
   8   7  13   -0.20    0.44
   8  -7  11    0.06    0.37
   8   7  11   -0.14    0.43
   8  -7   9   -0.13    0.34
   8   7   9    0.22    0.40
   8  -7   7    0.82    0.42
   8   7   7    0.89    0.51
   8  -7   5    0.27    0.34
   8   7   5    1.07    0.53
   8  -7   3    1.43    0.46
   8   7   3    1.18    0.48
   8  -7   1    1.68    0.46
   8   7   1    1.31    0.50
   8  -7  -1    0.97    0.41
   8   7  -1    0.30    0.35
   8  -7  -3   -0.03    0.27
   8   7  -3    0.00    0.33
  -8   7   3   -0.40    0.31
  -8  -7   5    0.44    0.36
   8  -7  -5    0.03    0.32
  -8   7   5    0.07    0.39
   8   7  -5    0.39    0.34
   8  -7  -7    0.06    0.28
  -8  -7   7    0.32    0.36
  -8   7   7   -0.29    0.36
   8  -7  -9    2.02    0.48
  -8  -7   9    1.81    0.53
  -8   7   9    2.52    0.64
   8  -7 -11    0.75    0.40
  -8  -7  11    1.25    0.50
  -8   7  11    1.16    0.53
  -8  -7  13    2.06    0.62
   8  -7 -13    1.54    0.45
  -8   7  13    1.64    0.58
   8  -7 -15    1.06    0.41
  -8  -7  15    0.67    0.44
  -8   7  15   -0.35    0.37
  -8  -7  17    5.40    0.86
  -8   7  17    4.34    0.79
  -8  -7  19    2.00    0.64
  -8   7  19    1.91    0.64
  -8   7  21    0.90    0.56
   8   8  12    0.21    0.54
   8   8  10    0.20    0.50
   8   8   8    0.32    0.48
   8   8   6    0.03    0.42
   8  -8   4    0.42    0.42
   8   8   4    0.56    0.50
   8  -8   2    0.34    0.41
   8   8   2    0.60    0.44
   8  -8   0    0.21    0.38
   8   8   0    0.44    0.46
   8  -8  -2    0.39    0.38
   8   8  -2    0.60    0.46
   8  -8  -4    1.49    0.48
  -8   8   4    0.88    0.57
   8  -8  -6    1.76    0.53
  -8   8   6    1.53    0.63
   8  -8  -8   -0.39    0.33
  -8   8   8   -0.38    0.39
  -8  -8  10    0.73    0.48
   8  -8 -10    0.20    0.38
  -8   8  10   -0.49    0.40
  -8  -8  12    0.45    0.49
   8  -8 -12    0.62    0.44
  -8   8  12    0.56    0.50
  -8   8  14    0.45    0.47
   9   0  31    1.23    0.59
   9   0  29    4.85    0.88
   9   0  27    7.23    0.98
   9   0  25   11.72    1.21
   9   0  23    8.26    0.97
   9   0  21    3.59    0.63
   9   0  19   13.05    1.02
   9   0  17    2.80    0.49
   9   0  15    0.88    0.32
   9   0  13    0.97    0.30
   9   0  11    1.14    0.30
   9   0  11    1.72    0.22
   9   0   9   40.11    1.80
   9   0   9   39.70    1.99
   9   0   7   54.44    2.56
   9   0   7   53.93    2.39
   9   0   5   56.09    2.66
   9   0   5   58.70    2.53
   9   0   3    4.20    0.43
   9   0   3    3.61    0.31
   9   0   1   62.26    2.86
   9   0   1   63.16    2.77
   9   0  -1   56.83    2.50
   9   0  -1   54.62    2.56
   9   0  -3   60.11    2.69
   9   0  -5  118.51    5.13
   9   0  -7  434.41   18.20
   9   0  -9  153.81    6.64
   9   0 -11   40.83    2.00
   9   0 -13   10.54    0.75
   9   0 -15    7.51    0.64
   9   0 -17   20.22    1.21
   9   0 -19    2.68    0.47
   9   0 -21    0.26    0.25
   9   0 -23   -0.12    0.28
  -9   0  25    3.79    0.63
   9   0 -25    4.33    0.65
   9   0 -27    5.69    0.77
  -9   0  27    4.19    0.70
   9   0 -29    6.29    0.83
  -9   0  29    5.44    0.82
  -9   0  31    0.59    0.43
   9   0 -31    0.29    0.36
  -9   0  33    4.32    0.79
   9   0 -33    3.59    0.69
  -9   0  35    6.93    1.01
   9  -1  30   -0.25    0.46
   9   1  30    0.24    0.46
   9  -1  28    1.17    0.52
   9   1  28    1.25    0.54
   9  -1  26    0.39    0.44
   9   1  26    0.02    0.38
   9  -1  24    1.82    0.55
   9   1  24    1.44    0.50
   9  -1  22    1.62    0.49
   9   1  22    1.34    0.45
   9  -1  20    8.26    0.89
   9   1  20    7.98    0.88
   9  -1  18    3.94    0.59
   9   1  18    2.29    0.50
   9  -1  16   19.24    1.21
   9   1  16   17.73    1.19
   9  -1  14   54.57    2.67
   9  -1  14   53.22    2.47
   9   1  14   53.85    2.67
   9  -1  12   63.26    2.94
   9  -1  12   62.00    2.76
   9   1  12   58.12    2.93
   9  -1  10   20.43    1.18
   9  -1  10   21.15    1.08
   9  -1   8   35.75    1.85
   9  -1   8   37.04    1.76
   9   1   8   39.34    1.62
   9   1   8   36.27    1.86
   9  -1   6   31.72    1.58
   9  -1   6   34.14    1.53
   9   1   6   29.95    1.40
   9   1   6   30.96    1.59
   9  -1   4   11.70    0.71
   9  -1   4   11.66    0.73
   9   1   4   12.32    0.77
   9   1   4   13.84    0.65
   9  -1   2    8.41    0.55
   9  -1   2    7.75    0.53
   9   1   2    6.57    0.53
   9   1   2    7.67    0.46
   9  -1   0    5.74    0.48
   9  -1   0    7.04    0.50
   9   1   0    7.72    0.53
   9   1   0    8.46    0.47
   9  -1  -2   78.50    3.42
   9  -1  -2   77.10    3.43
   9   1  -2   75.83    3.37
   9   1  -2   76.35    3.47
   9  -1  -4   46.30    2.10
   9   1  -4   43.47    2.07
   9  -1  -6   57.02    2.71
   9   1  -6   62.08    2.72
   9  -1  -8   31.12    1.60
   9   1  -8   33.49    1.61
   9  -1 -10   21.29    1.15
   9   1 -10   19.95    1.13
   9  -1 -12   42.32    2.04
   9   1 -12   40.61    2.03
   9  -1 -14   74.01    3.37
   9   1 -14   72.02    3.38
   9  -1 -16   42.36    2.24
   9   1 -16   48.96    2.30
   9  -1 -18   46.11    2.24
   9   1 -18   42.03    2.22
   9  -1 -20   44.60    2.28
   9   1 -20   45.62    2.32
   9  -1 -22   31.74    1.79
   9   1 -22   34.86    1.86
   9  -1 -24    4.10    0.58
  -9   1  24    3.67    0.61
   9   1 -24    5.08    0.68
   9  -1 -26    3.50    0.59
  -9   1  26    4.51    0.70
   9   1 -26    6.33    0.77
   9  -1 -28    2.39    0.52
   9   1 -28    2.13    0.50
  -9   1  28    2.24    0.57
   9  -1 -30    1.13    0.45
   9   1 -30    1.82    0.48
  -9   1  30    1.79    0.55
  -9   1  32   -0.17    0.37
   9   1 -32   -0.15    0.31
  -9   1  34   -0.23    0.41
   9   1 -34   -0.17    0.36
   9  -2  31    1.90    0.64
   9   2  31    2.94    0.74
   9  -2  29    4.01    0.78
   9   2  29    3.20    0.73
   9  -2  27    4.43    0.78
   9   2  27    4.25    0.80
   9  -2  25   10.91    1.14
   9   2  25   10.08    1.11
   9  -2  23   14.38    1.16
   9   2  23   14.39    1.18
   9   2  23   13.89    1.11
   9  -2  21    7.23    0.88
   9   2  21    9.01    0.91
   9   2  21    9.64    1.00
   9  -2  19   18.69    1.31
   9   2  19   21.36    1.35
   9  -2  17    1.91    0.44
   9  -2  17    2.41    0.41
   9   2  17    1.37    0.40
   9  -2  15    2.03    0.42
   9  -2  15    1.89    0.36
   9   2  15    1.79    0.40
   9  -2  13    3.41    0.48
   9  -2  13    3.22    0.43
   9   2  13    3.91    0.50
   9  -2  11    2.75    0.37
   9  -2  11    2.58    0.41
   9   2  11    2.74    0.43
   9  -2   9    2.92    0.38
   9  -2   9    2.89    0.39
   9   2   9    1.81    0.34
   9  -2   7   19.44    1.02
   9  -2   7   18.15    1.01
   9   2   7   15.66    1.01
   9  -2   5   26.57    1.31
   9  -2   5   27.23    1.34
   9   2   5   25.07    1.34
   9   2   5   23.86    1.14
   9  -2   3   27.40    1.33
   9  -2   3   26.76    1.36
   9   2   3   25.48    1.38
   9   2   3   26.17    1.22
   9  -2   1   67.45    3.04
   9  -2   1   66.88    3.06
   9   2   1   67.13    2.95
   9   2   1   68.96    3.10
   9  -2  -1  131.66    5.67
   9  -2  -1  132.58    5.69
   9   2  -1  130.35    5.74
   9   2  -1  128.39    5.59
   9  -2  -3  102.04    4.53
   9  -2  -3  103.32    4.56
   9   2  -3  105.47    4.51
   9  -2  -5   40.10    1.96
   9   2  -5   40.63    1.92
   9  -2  -7   82.36    3.67
   9   2  -7   80.44    3.65
   9  -2  -9   60.23    2.87
   9   2  -9   63.59    2.89
   9  -2 -11   33.30    1.70
   9   2 -11   33.17    1.72
   9  -2 -13   24.95    1.40
   9   2 -13   26.44    1.45
   9  -2 -15   26.95    1.42
   9   2 -15   22.90    1.39
   9  -2 -17   12.12    0.87
   9   2 -17   10.84    0.85
   9  -2 -19    2.10    0.42
   9   2 -19    2.46    0.46
   9  -2 -21    0.29    0.31
   9   2 -21    0.42    0.29
   9  -2 -23    1.62    0.41
   9   2 -23    1.05    0.37
   9  -2 -25    3.01    0.54
   9   2 -25    2.93    0.56
  -9   2  25    2.48    0.53
   9  -2 -27    6.29    0.76
   9   2 -27    4.68    0.72
  -9   2  27    4.89    0.73
   9  -2 -29    5.37    0.75
  -9   2  29    5.47    0.80
   9   2 -29    4.34    0.73
  -9   2  31    8.36    0.98
   9   2 -31    5.74    0.83
  -9   2  33    4.09    0.77
   9   2 -33    3.35    0.69
   9  -3  28   -0.22    0.36
   9   3  28   -0.12    0.42
   9  -3  26    0.25    0.42
   9   3  26   -0.27    0.38
   9  -3  24    3.04    0.64
   9   3  24    2.68    0.61
   9   3  24    2.43    0.59
   9  -3  22    3.10    0.59
   9   3  22    4.10    0.69
   9   3  22    4.62    0.73
   9  -3  20   12.58    1.04
   9   3  20   12.56    1.05
   9   3  20   13.11    1.08
   9  -3  18    7.39    0.77
   9  -3  18    7.07    0.80
   9   3  18    9.34    0.91
   9   3  18    8.49    0.91
   9  -3  16    9.48    0.79
   9  -3  16    9.65    0.81
   9   3  16    9.75    0.84
   9  -3  14    2.25    0.41
   9  -3  14    2.66    0.45
   9   3  14    1.74    0.41
   9  -3  12   30.08    1.59
   9  -3  12   29.22    1.59
   9   3  12   28.42    1.61
   9  -3  10   43.58    2.13
   9  -3  10   43.60    2.14
   9   3  10   41.55    2.15
   9  -3   8   30.38    1.54
   9  -3   8   29.37    1.58
   9   3   8   29.93    1.57
   9  -3   6   48.00    2.31
   9  -3   6   47.54    2.23
   9   3   6   46.77    2.29
   9  -3   4   55.40    2.65
   9  -3   4   56.98    2.57
   9   3   4   55.18    2.63
   9  -3   2    8.23    0.55
   9  -3   2    7.91    0.64
   9   3   2    9.21    0.55
   9   3   2    9.19    0.63
   9  -3   0    0.92    0.18
  -9  -3   0    0.46    0.19
   9  -3   0    0.78    0.24
   9   3   0    0.28    0.19
   9  -3  -2    3.43    0.34
   9  -3  -2    3.23    0.42
  -9  -3   2    3.56    0.42
   9   3  -2    3.42    0.42
  -9  -3   4    0.46    0.20
   9  -3  -4    0.41    0.20
   9  -3  -4    0.27    0.14
  -9  -3   6    9.69    0.72
   9  -3  -6    9.45    0.71
   9  -3  -8   18.95    1.13
  -9  -3   8   20.01    1.18
   9  -3 -10   47.16    2.36
  -9  -3  10   50.06    2.45
  -9  -3  12   31.09    1.71
   9  -3 -12   30.12    1.64
   9  -3 -14   42.10    2.10
  -9  -3  14   41.51    2.19
  -9   3  14   39.88    2.22
   9  -3 -16   30.98    1.65
  -9  -3  16   28.97    1.72
  -9   3  16   29.25    1.74
  -9  -3  18   23.85    1.49
   9  -3 -18   23.14    1.40
  -9   3  18   22.26    1.46
   9   3 -18   24.97    1.45
  -9  -3  20    3.94    0.62
   9  -3 -20    4.09    0.57
  -9   3  20    2.77    0.54
   9   3 -20    3.38    0.57
   9  -3 -22    6.13    0.71
   9   3 -22    5.75    0.76
  -9   3  22    7.13    0.80
   9  -3 -24   16.08    1.15
   9   3 -24   18.23    1.27
   9  -3 -26    5.36    0.71
   9   3 -26    4.36    0.68
   9   3 -28    7.26    0.91
   9   3 -30    1.01    0.45
   9   3 -32    0.86    0.48
   9   4  27    1.62    0.59
   9   4  25    1.52    0.56
   9   4  25    3.36    0.71
   9   4  23    5.36    0.83
   9   4  23    4.32    0.76
   9  -4  21    5.55    0.74
   9   4  21    5.11    0.80
   9   4  21    5.08    0.75
   9  -4  19    4.45    0.67
   9   4  19    4.18    0.74
   9   4  19    5.29    0.71
   9  -4  17    1.36    0.41
   9   4  17    1.31    0.44
   9   4  17    2.47    0.58
   9  -4  15    2.30    0.48
   9   4  15    3.01    0.51
   9   4  15    2.07    0.51
   9  -4  13   -0.16    0.21
   9   4  13    0.49    0.28
   9   4  13   -0.17    0.26
   9  -4  11    3.91    0.55
   9   4  11    4.42    0.55
   9   4  11    4.21    0.64
   9  -4   9    0.62    0.28
   9   4   9    0.59    0.32
   9   4   9    0.86    0.29
   9  -4   7    6.84    0.72
   9   4   7    7.05    0.60
   9  -4   5   18.03    1.08
   9   4   5   14.89    0.96
   9  -4   3   37.37    1.89
   9   4   3   34.65    1.80
  -9  -4  -1   35.02    1.72
   9  -4   1   34.69    1.82
   9   4   1   33.66    1.74
   9  -4  -1   25.72    1.38
  -9  -4   1   24.22    1.30
   9   4  -1   22.02    1.28
   9  -4  -3   49.81    2.50
  -9  -4   3   50.10    2.48
   9   4  -3   54.06    2.47
  -9  -4   5   32.47    1.71
   9  -4  -5   31.41    1.70
   9  -4  -7   17.91    1.16
  -9  -4   7   20.27    1.21
  -9  -4   9   21.61    1.31
   9  -4  -9   19.91    1.24
   9   4  -9   20.62    1.22
  -9   4   9   22.12    1.39
  -9  -4  11   37.65    2.04
   9  -4 -11   35.71    1.95
  -9   4  11   39.63    2.13
  -9  -4  13   10.95    0.93
   9  -4 -13   12.16    0.88
  -9   4  13   12.17    0.97
   9  -4 -15    0.13    0.24
  -9  -4  15    0.29    0.29
  -9   4  15    0.40    0.33
   9  -4 -17    2.33    0.46
  -9  -4  17    2.84    0.55
  -9   4  17    2.46    0.52
  -9  -4  19    0.53    0.37
   9  -4 -19    0.61    0.31
  -9   4  19    0.45    0.36
  -9  -4  21    0.41    0.36
   9  -4 -21    0.14    0.29
  -9   4  21    0.05    0.31
   9  -4 -23    2.28    0.48
  -9  -4  23    1.78    0.53
  -9   4  23    1.79    0.50
  -9  -4  25    2.14    0.56
   9   4 -25    1.36    0.48
  -9   4  25    2.07    0.55
   9   4 -27    2.63    0.63
   9   4 -29    3.99    0.74
   9   5  24   -0.25    0.42
   9  -5  22   -0.46    0.36
   9   5  22    0.59    0.46
   9  -5  20    2.02    0.53
   9   5  20    2.30    0.62
   9  -5  18    4.09    0.69
   9   5  18    6.06    0.89
   9  -5  16   14.34    1.16
   9   5  16   17.19    1.34
   9  -5  14   16.57    1.20
   9   5  14   16.24    1.30
   9  -5  12   16.09    1.18
   9   5  12   17.08    1.33
   9  -5  10   24.49    1.53
   9   5  10   25.52    1.70
   9  -5   8   10.82    0.89
   9   5   8   11.19    1.00
   9  -5   6    2.91    0.50
   9   5   6    3.00    0.61
   9  -5   4   10.40    0.84
   9   5   4   10.53    1.07
   9  -5   2    8.47    0.83
   9   5   2    8.56    0.65
   9   5   2    8.73    0.94
   9  -5   0    1.36    0.36
   9   5   0    2.01    0.46
   9   5   0    1.59    0.33
   9  -5  -2    1.88    0.41
  -9  -5   2    1.68    0.38
   9   5  -2    1.70    0.33
   9   5  -2    1.47    0.40
  -9  -5   4    0.04    0.25
   9  -5  -4    0.30    0.26
   9   5  -4    0.45    0.25
   9   5  -4    0.44    0.28
   9  -5  -6    1.72    0.38
  -9  -5   6    0.78    0.32
  -9   5   6    0.50    0.35
   9   5  -6    0.43    0.28
   9   5  -6    0.68    0.27
  -9  -5   8    2.41    0.48
   9  -5  -8    1.68    0.40
  -9   5   8    1.89    0.48
   9   5  -8    2.36    0.43
  -9  -5  10    8.26    0.87
   9  -5 -10    7.70    0.78
  -9   5  10    7.45    0.89
  -9  -5  12    2.56    0.54
   9  -5 -12    2.84    0.49
  -9   5  12    1.20    0.46
   9  -5 -14    5.50    0.67
  -9  -5  14    3.94    0.66
  -9   5  14    5.36    0.76
   9  -5 -16   24.58    1.49
  -9  -5  16   25.97    1.63
  -9   5  16   23.58    1.61
  -9  -5  18   10.37    1.11
   9  -5 -18   10.90    0.89
  -9   5  18    9.52    1.05
  -9  -5  20   16.13    1.28
   9  -5 -20   16.31    1.15
  -9   5  20   13.80    1.19
   9  -5 -22    7.96    0.88
  -9  -5  22    9.37    1.09
  -9   5  22    9.19    1.04
  -9  -5  24    5.63    0.86
  -9   5  24    5.20    0.81
  -9  -5  26    2.55    0.66
  -9   5  26    2.31    0.63
   9  -6  21    0.10    0.41
   9   6  21    0.26    0.51
   9  -6  19    1.32    0.53
   9   6  19    2.02    0.64
   9  -6  17    0.40    0.39
   9   6  17    0.97    0.50
   9  -6  15    0.14    0.35
   9   6  15    0.54    0.46
   9  -6  13    0.50    0.38
   9   6  13    0.67    0.46
   9  -6  11    2.51    0.55
   9   6  11    1.82    0.55
   9  -6   9    1.24    0.43
   9   6   9    2.30    0.58
   9  -6   7    0.79    0.37
   9   6   7    1.35    0.48
   9  -6   5   10.79    1.05
   9   6   5   10.57    1.16
   9  -6   3   10.20    0.99
   9   6   3    9.84    1.08
   9  -6   1    6.59    0.78
   9   6   1    7.09    0.87
   9  -6  -1    8.54    0.87
   9   6  -1    6.78    0.85
   9  -6  -3   12.97    1.00
   9   6  -3   12.64    1.05
   9  -6  -5   13.78    1.07
  -9  -6   5   17.10    1.16
   9   6  -5   14.93    1.13
  -9   6   5   15.03    1.21
   9  -6  -7   18.01    1.25
  -9  -6   7   16.89    1.24
  -9   6   7   18.68    1.36
   9   6  -7   18.18    1.24
  -9  -6   9    7.20    0.85
   9  -6  -9    6.43    0.78
  -9   6   9    7.85    0.96
  -9  -6  11    6.98    0.87
   9  -6 -11    7.52    0.84
  -9   6  11    7.66    0.98
   9  -6 -13    4.53    0.66
  -9  -6  13    3.49    0.67
  -9   6  13    4.77    0.76
  -9  -6  15   -0.22    0.31
   9  -6 -15   -0.44    0.23
  -9   6  15   -0.11    0.32
   9  -6 -17    0.46    0.33
  -9  -6  17    0.57    0.43
  -9   6  17    1.95    0.56
   9  -6 -19    1.19    0.42
  -9  -6  19    0.63    0.43
  -9   6  19    1.82    0.56
  -9  -6  21    0.37    0.46
  -9   6  21    0.66    0.47
  -9  -6  23    1.33    0.60
  -9   6  23    0.81    0.53
  -9   6  25    1.77    0.63
   9   7  16    3.14    0.82
   9  -7  14    3.98    0.77
   9   7  14    5.16    0.93
   9  -7  12    3.71    0.71
   9   7  12    3.97    0.86
   9  -7  10    7.15    0.93
   9   7  10    7.47    1.09
   9  -7   8    4.40    0.71
   9   7   8    5.88    0.94
   9  -7   6    4.39    0.73
   9   7   6    4.33    0.79
   9  -7   4    2.39    0.55
   9   7   4    2.39    0.64
   9  -7   2    3.32    0.63
   9   7   2    2.46    0.63
   9  -7   0    0.60    0.36
   9   7   0    1.15    0.49
   9  -7  -2    1.32    0.45
   9   7  -2    2.54    0.60
   9  -7  -4    0.10    0.32
   9   7  -4   -0.16    0.33
   9  -7  -6    1.30    0.44
  -9   7   6    1.01    0.51
  -9  -7   8    2.01    0.55
   9  -7  -8    1.31    0.44
  -9   7   8    0.84    0.47
   9  -7 -10    2.79    0.57
  -9  -7  10    3.20    0.66
  -9   7  10    3.01    0.68
  -9  -7  12    5.36    0.85
   9  -7 -12    4.29    0.67
  -9   7  12    3.79    0.78
  -9  -7  14    2.66    0.65
   9  -7 -14    2.77    0.58
  -9   7  14    3.54    0.74
   9  -7 -16    2.78    0.61
  -9  -7  16    6.16    0.93
  -9   7  16    4.87    0.86
  -9  -7  18    3.12    0.74
  -9   7  18    2.76    0.73
  -9   7  20    3.61    0.80
   9   8   9    0.20    0.51
   9   8   7    2.95    0.77
   9   8   5    1.75    0.63
   9  -8   3    2.66    0.64
   9   8   3    2.04    0.65
   9  -8   1    6.03    0.84
   9   8   1    4.50    0.84
   9  -8  -1    5.23    0.81
   9   8  -1    5.00    0.87
   9  -8  -3    2.42    0.60
   9  -8  -5    3.18    0.68
   9  -8  -7    3.46    0.68
  -9   8   7    3.17    0.80
   9  -8  -9    1.27    0.48
  -9   8   9    0.90    0.56
   9  -8 -11    0.41    0.40
  -9  -8  11    0.31    0.51
  -9   8  11    0.02    0.49
   9  -8 -13    0.61    0.45
  -9   8  13    1.23    0.61
  10   0  30    0.17    0.49
  10   0  28    2.07    0.63
  10   0  26    5.65    0.87
  10   0  24    4.92    0.78
  10   0  22    4.51    0.72
  10   0  20    3.35    0.61
  10   0  18    1.19    0.39
  10   0  16    2.14    0.47
  10   0  14    3.33    0.50
  10   0  12    0.77    0.27
  10   0  10    8.21    0.68
  10   0  10    9.14    0.53
  10   0   8    2.75    0.40
  10   0   8    3.29    0.32
  10   0   6    2.95    0.30
  10   0   6    3.28    0.42
  10   0   4    0.09    0.12
  10   0   4    0.01    0.15
  10   0   2    1.50    0.27
  10   0   2    1.69    0.25
  10   0   0    0.43    0.17
  10   0   0    0.59    0.21
  10   0  -2    3.49    0.40
  10   0  -2    3.43    0.36
  10   0  -4   95.14    4.17
  10   0  -6   27.09    1.37
  10   0  -8    0.30    0.17
  10   0 -10    0.66    0.23
  10   0 -12    0.17    0.19
  10   0 -14    4.81    0.56
  10   0 -16   -0.28    0.19
  10   0 -18   -0.04    0.25
  10   0 -20    0.49    0.30
  10   0 -22    2.23    0.48
  10   0 -24    0.17    0.29
  10   0 -26   12.18    1.13
  10   0 -28    5.00    0.72
  10   0 -30   -0.10    0.31
  10   0 -32    2.00    0.55
  10   0 -34    0.92    0.47
  10  -1  31   -0.22    0.48
  10   1  31   -0.28    0.41
  10  -1  29    0.77    0.50
  10   1  29    1.09    0.58
  10  -1  27    0.97    0.53
  10   1  27    0.69    0.49
  10  -1  25    0.36    0.44
  10   1  25    0.56    0.43
  10  -1  23    2.70    0.62
  10   1  23    1.93    0.55
  10  -1  21    2.69    0.55
  10   1  21    1.67    0.50
  10  -1  19    2.46    0.52
  10   1  19    2.33    0.50
  10  -1  17    5.40    0.70
  10   1  17    6.56    0.74
  10  -1  15    3.54    0.54
  10   1  15    3.00    0.51
  10  -1  13   13.85    0.81
  10  -1  13   13.24    0.95
  10   1  13   14.08    0.95
  10  -1  11    3.64    0.38
  10  -1  11    3.25    0.46
  10   1  11    2.14    0.40
  10  -1   9   11.78    0.72
  10  -1   9   12.04    0.82
  10   1   9   12.59    0.83
  10  -1   7    4.71    0.51
  10  -1   7    4.71    0.42
  10   1   7    5.33    0.55
  10   1   7    5.89    0.34
  10  -1   5   10.28    0.64
  10  -1   5    9.78    0.68
  10   1   5   10.45    0.56
  10   1   5   10.51    0.71
  10  -1   3    8.05    0.59
  10  -1   3    8.97    0.59
  10   1   3    9.50    0.52
  10   1   3    8.30    0.61
  10  -1   1    0.65    0.20
  10  -1   1    0.89    0.22
  10   1   1    0.72    0.17
  10   1   1    1.38    0.26
  10  -1  -1    2.47    0.34
  10  -1  -1    2.69    0.34
  10   1  -1    2.63    0.35
  10   1  -1    2.42    0.29
  10  -1  -3   30.93    1.49
  10  -1  -3   29.14    1.48
  10   1  -3   29.29    1.44
  10  -1  -5   16.52    0.96
  10   1  -5   17.45    0.96
  10  -1  -7    6.95    0.57
  10   1  -7    7.26    0.56
  10  -1  -9    2.49    0.36
  10   1  -9    1.16    0.27
  10  -1 -11    1.51    0.30
  10   1 -11    0.58    0.24
  10  -1 -13    8.18    0.66
  10   1 -13    8.33    0.66
  10  -1 -15    9.61    0.72
  10   1 -15    7.91    0.69
  10  -1 -17    4.80    0.59
  10   1 -17    6.73    0.69
  10  -1 -19    1.62    0.40
  10   1 -19    1.32    0.36
  10  -1 -21    0.47    0.29
  10   1 -21    1.21    0.37
  10  -1 -23    7.58    0.82
  10   1 -23    9.19    0.90
  10  -1 -25    0.63    0.36
  10   1 -25    0.49    0.34
  10  -1 -27    3.62    0.60
  10   1 -27    3.29    0.61
  10  -1 -29    7.25    0.86
  10   1 -29    4.74    0.75
  10  -1 -31    0.87    0.41
  10   1 -31    0.47    0.38
  10   1 -33   -0.21    0.34
  10  -2  30    2.81    0.70
  10   2  30    2.17    0.71
  10  -2  28    2.80    0.71
  10   2  28    3.40    0.76
  10  -2  26    3.12    0.70
  10   2  26    3.61    0.75
  10  -2  24    2.81    0.65
  10   2  24    2.15    0.59
  10  -2  22    2.31    0.57
  10   2  22    2.68    0.59
  10  -2  20    1.98    0.51
  10   2  20    2.47    0.56
  10  -2  18    2.53    0.49
  10   2  18    0.86    0.38
  10  -2  16    3.69    0.57
  10   2  16    4.13    0.60
  10  -2  14    0.04    0.24
  10  -2  14    0.25    0.21
  10   2  14   -0.19    0.23
  10  -2  12    0.36    0.22
  10  -2  12    0.42    0.21
  10   2  12    0.45    0.28
  10  -2  10    0.47    0.23
  10  -2  10    0.53    0.24
  10   2  10    0.40    0.24
  10  -2   8    1.61    0.31
  10  -2   8    2.15    0.35
  10   2   8    2.23    0.37
  10  -2   6    4.49    0.47
  10  -2   6    4.99    0.51
  10   2   6    4.02    0.49
  10  -2   4    9.82    0.62
  10  -2   4    8.82    0.62
  10   2   4    8.29    0.63
  10   2   4    7.91    0.48
  10  -2   2    1.61    0.29
  10  -2   2    1.48    0.27
  10   2   2    1.87    0.24
  10   2   2    1.80    0.32
  10  -2   0   19.57    1.01
  10  -2   0   19.89    1.07
  10   2   0   17.95    0.95
  10   2   0   17.71    1.05
  10  -2  -2    2.59    0.33
  10  -2  -2    2.76    0.38
  10   2  -2    3.09    0.39
  10   2  -2    2.61    0.32
  10  -2  -4    4.60    0.50
  10  -2  -4    4.63    0.39
  10   2  -4    4.24    0.44
  10  -2  -6   14.72    0.93
  10   2  -6   15.78    0.91
  10  -2  -8    5.74    0.58
  10   2  -8    6.47    0.54
  10  -2 -10    9.86    0.72
  10   2 -10    9.41    0.71
  10  -2 -12    3.67    0.49
  10   2 -12    4.19    0.50
  10  -2 -14    0.55    0.27
  10   2 -14    1.21    0.32
  10  -2 -16    2.23    0.43
  10   2 -16    1.59    0.37
  10  -2 -18    2.75    0.48
  10   2 -18    2.37    0.45
  10  -2 -20    0.34    0.28
  10   2 -20    0.55    0.30
  10  -2 -22    0.35    0.32
  10   2 -22    1.17    0.38
  10  -2 -24    3.26    0.58
  10   2 -24    4.73    0.68
  10  -2 -26    0.65    0.39
  10   2 -26    0.84    0.38
  10  -2 -28    2.14    0.51
  10   2 -28    1.91    0.51
  10  -2 -30    5.74    0.79
  10   2 -30    4.51    0.74
  10   2 -32    2.79    0.64
  10  -3  29   -0.24    0.46
  10   3  29   -0.22    0.43
  10  -3  27    0.16    0.44
  10   3  27    0.14    0.43
  10  -3  25    1.59    0.54
  10   3  25    2.25    0.61
  10  -3  23    1.51    0.51
  10   3  23    0.77    0.43
  10   3  23    0.40    0.41
  10  -3  21    3.77    0.65
  10   3  21    3.17    0.60
  10   3  21    2.98    0.60
  10  -3  19    4.33    0.64
  10   3  19    1.65    0.51
  10   3  19    2.33    0.52
  10  -3  17   10.42    0.85
  10  -3  17    9.97    0.97
  10   3  17   12.57    0.97
  10  -3  15    1.25    0.38
  10  -3  15    1.39    0.38
  10   3  15    1.10    0.36
  10  -3  13    2.08    0.40
  10  -3  13    1.92    0.41
  10   3  13    1.65    0.41
  10  -3  11    7.34    0.71
  10  -3  11    6.75    0.70
  10   3  11    7.76    0.75
  10  -3   9    8.36    0.77
  10  -3   9    9.10    0.66
  10   3   9    7.44    0.66
  10  -3   7   11.25    0.74
  10  -3   7   11.62    0.81
  10   3   7   11.32    0.80
  10  -3   5    2.92    0.37
  10  -3   5    2.51    0.39
  10   3   5    2.23    0.37
  10  -3   3    3.26    0.37
  10  -3   3    3.26    0.45
  10   3   3    3.51    0.45
  10  -3   1    4.47    0.42
  10  -3   1    3.75    0.47
  10   3   1    3.82    0.38
  10   3   1    4.18    0.48
  10  -3  -1    9.53    0.70
  10  -3  -1    9.35    0.59
  10   3  -1    9.29    0.63
  10   3  -1    8.78    0.66
  10  -3  -3    6.25    0.45
  10  -3  -3    5.84    0.60
  10   3  -3    6.90    0.57
  10   3  -3    6.72    0.59
  10  -3  -5    6.68    0.47
  10  -3  -5    6.41    0.64
 -10  -3   5    6.27    0.62
  10   3  -5    6.13    0.53
 -10  -3   7    1.15    0.31
  10  -3  -7    1.38    0.32
  10   3  -7    0.91    0.28
 -10  -3   9    5.04    0.60
  10  -3  -9    5.33    0.59
  10   3  -9    6.22    0.62
 -10  -3  11    1.26    0.34
  10  -3 -11    1.34    0.34
  10   3 -11    1.52    0.34
  10  -3 -13    1.25    0.35
 -10  -3  13    1.37    0.38
  10   3 -13    1.49    0.36
 -10  -3  15    7.35    0.79
  10  -3 -15    5.34    0.63
  10   3 -15    4.85    0.65
  10  -3 -17    2.11    0.43
  10   3 -17    0.86    0.34
  10  -3 -19    2.07    0.45
  10   3 -19    1.67    0.42
  10  -3 -21    2.99    0.52
  10   3 -21    2.04    0.49
  10  -3 -23    1.29    0.41
  10   3 -23    1.51    0.44
  10  -3 -25    5.73    0.73
  10   3 -25    5.67    0.77
  10  -3 -27    3.20    0.61
  10   3 -27    3.69    0.66
  10   3 -29    0.38    0.37
  10   3 -31    0.57    0.44
  10   4  26    0.68    0.49
  10   4  26    0.77    0.52
  10   4  24    2.49    0.65
  10   4  24    2.80    0.68
  10   4  22    1.80    0.56
  10   4  22    2.34    0.59
  10  -4  20    2.85    0.59
  10   4  20    3.32    0.62
  10   4  20    2.47    0.60
  10  -4  18    0.52    0.36
  10   4  18    0.56    0.39
  10   4  18    0.40    0.36
  10  -4  16    0.21    0.30
  10   4  16    0.04    0.27
  10   4  16   -0.37    0.25
  10  -4  14    0.18    0.26
  10   4  14   -0.10    0.29
  10   4  14    0.67    0.35
  10  -4  12    2.36    0.45
  10   4  12    2.87    0.58
  10   4  12    3.22    0.51
  10  -4  10    0.52    0.27
  10   4  10   -0.09    0.24
  10  -4   8    4.53    0.59
  10   4   8    3.24    0.48
  10  -4   6    1.79    0.40
  10   4   6    1.80    0.35
  10  -4   4    3.22    0.49
  10   4   4    3.15    0.45
  10  -4   2    3.03    0.47
  10   4   2    2.64    0.42
 -10  -4   0    5.04    0.53
  10  -4   0    4.19    0.56
  10   4   0    5.04    0.55
  10  -4  -2    3.51    0.49
 -10  -4   2    3.12    0.45
  10   4  -2    3.53    0.46
  10  -4  -4    1.45    0.37
 -10  -4   4    1.11    0.31
  10   4  -4    0.92    0.29
 -10  -4   6    0.64    0.27
  10  -4  -6    0.01    0.20
 -10  -4   8    4.66    0.61
  10  -4  -8    4.46    0.57
  10  -4 -10    1.55    0.37
 -10  -4  10    1.43    0.39
  10  -4 -12    5.79    0.67
 -10  -4  12    5.63    0.73
  10  -4 -14    2.31    0.45
 -10  -4  14    2.51    0.52
  10  -4 -16    1.51    0.39
 -10  -4  16    1.02    0.40
 -10   4  16    1.20    0.42
  10  -4 -18    0.56    0.31
 -10  -4  18    0.77    0.41
 -10   4  18    0.86    0.41
 -10  -4  20    2.07    0.53
  10  -4 -20    2.45    0.50
 -10   4  20    1.88    0.52
  10  -4 -22    1.21    0.43
 -10  -4  22    2.27    0.55
 -10   4  22    2.14    0.52
  10   4 -22    2.03    0.51
  10  -4 -24    0.99    0.42
  10   4 -24    0.56    0.38
 -10   4  24    0.37    0.37
  10   4 -26    0.79    0.44
  10   4 -28    0.75    0.45
  10   5  23    0.18    0.45
  10  -5  21    0.68    0.46
  10   5  21    0.28    0.42
  10  -5  19    1.81    0.52
  10   5  19    1.77    0.57
  10  -5  17    1.59    0.49
  10   5  17    2.44    0.62
  10  -5  15    3.58    0.63
  10   5  15    3.87    0.72
  10  -5  13    5.43    0.73
  10   5  13    6.64    0.91
  10  -5  11    1.11    0.39
  10   5  11    2.76    0.59
  10  -5   9    1.92    0.45
  10   5   9    2.51    0.45
  10   5   9    3.11    0.62
  10  -5   7    0.98    0.37
  10   5   7    0.99    0.32
  10   5   7    1.10    0.43
  10  -5   5    0.20    0.27
  10   5   5    0.23    0.31
  10   5   5    0.50    0.27
  10  -5   3   -0.20    0.21
  10   5   3    0.02    0.22
  10   5   3   -0.09    0.26
  10  -5   1    0.88    0.33
  10   5   1    0.98    0.40
  10   5   1    0.78    0.30
  10  -5  -1    0.20    0.26
  10   5  -1    1.38    0.33
  10   5  -1    0.76    0.34
  10  -5  -3    3.61    0.55
 -10  -5   3    3.62    0.53
  10   5  -3    3.37    0.56
  10   5  -3    3.60    0.47
 -10  -5   5    5.04    0.66
  10  -5  -5    5.08    0.64
  10   5  -5    6.27    0.72
  10   5  -5    6.46    0.63
 -10  -5   7    3.50    0.57
  10  -5  -7    4.37    0.59
  10   5  -7    3.27    0.53
 -10  -5   9    2.27    0.49
  10  -5  -9    1.99    0.43
 -10  -5  11    0.16    0.29
  10  -5 -11    0.26    0.28
 -10   5  11   -0.12    0.31
 -10  -5  13    1.30    0.43
  10  -5 -13    0.97    0.37
 -10   5  13    0.40    0.36
  10  -5 -15    0.44    0.33
 -10  -5  15    0.68    0.39
 -10   5  15    0.46    0.38
 -10  -5  17    2.92    0.62
  10  -5 -17    3.45    0.56
 -10   5  17    3.02    0.64
 -10  -5  19    6.05    0.85
  10  -5 -19    4.17    0.65
 -10   5  19    3.78    0.69
  10  -5 -21    0.41    0.31
 -10  -5  21    0.54    0.43
 -10   5  21   -0.13    0.39
  10  -5 -23    1.32    0.44
 -10  -5  23    2.09    0.58
 -10   5  23    3.02    0.63
 -10  -5  25    0.38    0.40
 -10   5  25   -0.04    0.43
  10  -6  20    0.86    0.52
  10   6  20    1.04    0.55
  10  -6  18    0.50    0.44
  10   6  18   -0.19    0.43
  10  -6  16   -0.10    0.33
  10   6  16    0.05    0.40
  10  -6  14    0.72    0.42
  10   6  14    0.56    0.48
  10  -6  12    0.17    0.32
  10   6  12    0.21    0.42
  10  -6  10    0.15    0.32
  10   6  10    1.16    0.50
  10  -6   8    1.31    0.42
  10   6   8    1.03    0.47
  10  -6   6    0.34    0.34
  10   6   6    0.18    0.33
  10  -6   4    0.40    0.34
  10   6   4    0.34    0.39
  10  -6   2    0.16    0.29
  10   6   2   -0.08    0.32
  10  -6   0    0.13    0.27
  10   6   0    0.14    0.31
  10  -6  -2    0.42    0.30
  10   6  -2    0.48    0.35
  10  -6  -4    2.94    0.56
  10   6  -4    3.27    0.59
 -10  -6   6    0.45    0.35
  10  -6  -6   -0.24    0.25
  10   6  -6    0.86    0.39
  10  -6  -8    1.43    0.43
 -10  -6   8    1.09    0.41
 -10  -6  10    0.70    0.42
  10  -6 -10    1.33    0.41
 -10   6  10    2.01    0.57
 -10  -6  12    0.33    0.35
  10  -6 -12    0.13    0.32
 -10   6  12    0.15    0.39
  10  -6 -14   -0.01    0.27
 -10  -6  14    0.54    0.42
 -10   6  14    0.40    0.43
 -10  -6  16    0.10    0.37
  10  -6 -16    0.03    0.32
 -10   6  16   -0.32    0.36
  10  -6 -18    2.01    0.51
 -10  -6  18    1.14    0.54
 -10   6  18    1.30    0.52
 -10  -6  20   -0.16    0.37
  10  -6 -20    0.26    0.37
 -10   6  20    0.33    0.41
 -10  -6  22    0.10    0.42
 -10   6  22    0.39    0.47
 -10   6  24    0.35    0.46
  10   7  15    1.59    0.65
  10  -7  13    1.87    0.57
  10   7  13    1.19    0.60
  10  -7  11    0.76    0.45
  10   7  11    1.23    0.58
  10  -7   9    1.61    0.53
  10   7   9    2.80    0.73
  10  -7   7    0.14    0.34
  10   7   7   -0.06    0.39
  10  -7   5    0.10    0.35
  10   7   5    0.04    0.40
  10  -7   3    0.24    0.35
  10   7   3    0.21    0.41
  10  -7   1   -0.27    0.27
  10   7   1    0.56    0.43
  10  -7  -1    0.32    0.36
  10   7  -1    0.36    0.39
  10  -7  -3    0.01    0.33
  10   7  -3    0.14    0.36
  10  -7  -5    0.06    0.31
  10  -7  -7    1.66    0.48
 -10  -7   9    0.28    0.40
  10  -7  -9    0.20    0.35
 -10   7   9   -0.25    0.40
 -10  -7  11    0.69    0.46
  10  -7 -11    1.26    0.44
 -10   7  11    0.81    0.51
 -10  -7  13    0.14    0.41
  10  -7 -13    1.04    0.45
 -10   7  13    0.14    0.46
  10  -7 -15    0.53    0.40
 -10  -7  15    0.95    0.50
 -10   7  15   -0.02    0.45
 -10  -7  17   -0.01    0.40
  10  -7 -17    0.42    0.38
 -10   7  17    0.33    0.49
 -10   7  19   -0.17    0.45
  10   8   8    1.08    0.60
  10   8   6    0.44    0.51
  10   8   4    0.09    0.46
  10   8   2    0.99    0.54
  10   8   0   -0.10    0.44
  10  -8  -2   -0.31    0.35
  10   8  -2    0.59    0.48
  10  -8  -4    0.16    0.40
  10  -8  -6    0.67    0.46
  10  -8  -8    0.13    0.35
  10  -8 -10    0.09    0.37
 -10  -8  12    0.05    0.48
 -10   8  12   -0.42    0.43
  11   0  29    0.41    0.56
  11   0  25    0.52    0.48
  11   0  23   -0.33    0.30
  11   0  21   14.27    1.15
  11   0  19    1.09    0.42
  11   0  17    9.03    0.90
  11   0  15   13.11    0.98
  11   0  13    0.46    0.25
  11   0  11    4.55    0.57
  11   0   9    9.32    0.71
  11   0   9    9.29    0.56
  11   0   7  115.58    5.15
  11   0   7  114.04    4.92
  11   0   5   24.42    1.17
  11   0   5   22.11    1.27
  11   0   3   61.38    2.89
  11   0   3   61.91    2.75
  11   0   1   53.87    2.41
  11   0   1   52.07    2.51
  11   0  -1   47.15    2.21
  11   0  -1   48.75    2.29
  11   0  -3   59.81    2.80
  11   0  -3   60.33    2.73
  11   0  -5  119.98    5.23
  11   0  -7   84.60    3.79
  11   0  -9   43.18    2.09
  11   0 -11   47.69    2.31
  11   0 -13   18.70    1.13
  11   0 -15   28.55    1.58
  11   0 -17    1.15    0.34
  11   0 -19    3.93    0.57
  11   0 -21    0.14    0.28
  11   0 -23    0.78    0.36
  11   0 -25   15.82    1.16
  11   0 -27    2.25    0.52
  11   0 -29    9.94    1.04
  11   0 -31    8.21    0.98
  11   0 -33    8.23    1.00
  11  -1  30    0.07    0.43
  11   1  30    0.49    0.49
  11  -1  28    0.17    0.48
  11   1  28    0.23    0.45
  11  -1  26    0.65    0.48
  11   1  26   -0.04    0.40
  11  -1  24    0.27    0.43
  11   1  24   -0.07    0.40
  11  -1  22    1.68    0.49
  11   1  22    2.52    0.60
  11  -1  20    1.00    0.45
  11   1  20    0.59    0.38
  11  -1  18    9.37    0.94
  11   1  18    9.73    0.98
  11  -1  16    5.13    0.69
  11   1  16    8.16    0.82
  11  -1  14    7.77    0.80
  11   1  14    9.48    0.78
  11  -1  12    7.52    0.75
  11  -1  12    8.52    0.59
  11   1  12    8.43    0.73
  11  -1  10   13.50    0.96
  11  -1  10   16.09    0.87
  11  -1   8    6.62    0.48
  11  -1   8    6.00    0.59
  11   1   8    4.89    0.57
  11  -1   6   34.49    1.66
  11  -1   6   32.24    1.74
  11   1   6   35.12    1.56
  11   1   6   35.62    1.79
  11  -1   4   32.06    1.51
  11  -1   4   28.99    1.54
  11   1   4   28.15    1.56
  11   1   4   31.21    1.41
  11  -1   2   20.67    1.13
  11  -1   2   19.73    1.08
  11   1   2   19.75    1.14
  11   1   2   20.77    1.02
  11  -1   0   39.42    1.94
  11  -1   0   42.48    1.98
  11   1   0   40.23    1.88
  11   1   0   40.64    2.01
  11  -1  -2    4.25    0.45
  11  -1  -2    4.85    0.48
  11   1  -2    4.62    0.39
  11   1  -2    4.70    0.50
  11  -1  -4   10.67    0.71
  11  -1  -4   11.08    0.71
  11   1  -4   10.81    0.68
  11  -1  -6    6.80    0.56
  11   1  -6    6.78    0.54
  11  -1  -8   29.43    1.54
  11   1  -8   30.20    1.55
  11  -1 -10   19.34    1.13
  11   1 -10   19.86    1.14
  11  -1 -12   58.53    2.74
  11   1 -12   55.82    2.72
  11  -1 -14   42.46    2.21
  11   1 -14   46.29    2.26
  11  -1 -16   34.98    1.78
  11   1 -16   30.51    1.76
  11  -1 -18   21.88    1.31
  11   1 -18   20.38    1.30
  11  -1 -20   29.36    1.66
  11   1 -20   28.36    1.67
  11  -1 -22   12.53    0.99
  11   1 -22   13.92    1.03
  11  -1 -24    5.89    0.74
  11   1 -24    6.73    0.80
  11  -1 -26   15.91    1.14
  11   1 -26   13.70    1.14
  11  -1 -28    1.91    0.51
  11   1 -28    3.27    0.64
  11  -1 -30    0.76    0.41
  11   1 -30    1.95    0.53
  11  -1 -32    0.28    0.41
  11   1 -32    0.10    0.37
  11   1 -34    0.69    0.46
  11  -2  29    0.25    0.47
  11   2  29    0.61    0.53
  11  -2  27    3.68    0.75
  11   2  27    2.85    0.69
  11  -2  25    5.44    0.86
  11   2  25    7.54    0.99
  11  -2  23    4.80    0.75
  11   2  23    3.76    0.72
  11  -2  21    3.59    0.65
  11   2  21    3.50    0.66
  11  -2  19    1.64    0.46
  11   2  19    1.89    0.48
  11  -2  17    6.73    0.78
  11   2  17    6.78    0.79
  11  -2  15    2.07    0.46
  11   2  15    2.76    0.50
  11  -2  13    3.50    0.46
  11  -2  13    3.49    0.51
  11   2  13    3.01    0.52
  11  -2  11    2.73    0.38
  11  -2  11    2.56    0.42
  11   2  11    1.57    0.37
  11  -2   9    5.56    0.57
  11  -2   9    7.30    0.60
  11   2   9    6.16    0.65
  11  -2   7   15.92    0.98
  11  -2   7   17.40    1.02
  11   2   7   17.13    1.04
  11  -2   5   18.35    1.08
  11  -2   5   20.58    1.11
  11   2   5   18.83    1.13
  11  -2   3   37.87    1.89
  11  -2   3   38.27    1.87
  11   2   3   38.22    1.74
  11   2   3   38.97    1.94
  11  -2   1   69.80    3.18
  11  -2   1   70.17    3.20
  11   2   1   70.86    3.26
  11   2   1   68.32    3.06
  11  -2  -1   66.71    3.01
  11  -2  -1   64.35    2.96
  11   2  -1   64.81    3.03
  11   2  -1   63.64    2.90
  11  -2  -3   57.77    2.56
  11  -2  -3   57.03    2.61
  11   2  -3   51.95    2.51
  11   2  -3   53.30    2.62
  11  -2  -5   39.00    1.94
  11  -2  -5   37.28    1.98
  11   2  -5   45.51    1.98
  11  -2  -7   31.27    1.65
  11   2  -7   32.14    1.63
  11  -2  -9   48.57    2.41
  11   2  -9   50.93    2.41
  11  -2 -11   34.29    1.74
  11   2 -11   31.52    1.72
  11  -2 -13   38.80    1.97
  11   2 -13   37.26    1.97
  11  -2 -15   39.26    1.99
  11   2 -15   36.18    1.98
  11  -2 -17    4.54    0.60
  11   2 -17    5.14    0.65
  11  -2 -19   -0.07    0.24
  11   2 -19    0.07    0.27
  11  -2 -21    2.61    0.52
  11   2 -21    2.35    0.49
  11  -2 -23    2.88    0.55
  11   2 -23    2.56    0.54
  11  -2 -25    6.74    0.82
  11   2 -25    8.75    0.93
  11  -2 -27    3.59    0.63
  11   2 -27    5.94    0.77
  11  -2 -29    9.26    1.01
  11   2 -29    9.32    1.04
  11  -2 -31    6.91    0.89
  11   2 -31    6.26    0.87
  11  -3  28   -0.42    0.40
  11   3  28   -0.37    0.46
  11  -3  26    0.10    0.45
  11   3  26    0.21    0.47
  11  -3  24    0.61    0.42
  11   3  24    0.04    0.37
  11   3  24    0.11    0.41
  11  -3  22    0.51    0.41
  11   3  22    0.30    0.40
  11   3  22    0.98    0.46
  11  -3  20    2.95    0.60
  11   3  20    2.33    0.57
  11   3  20    2.56    0.58
  11  -3  18    6.56    0.81
  11   3  18    8.35    0.90
  11  -3  16    0.52    0.31
  11  -3  16    0.75    0.37
  11   3  16    0.25    0.33
  11  -3  14   13.76    0.97
  11  -3  14   14.50    1.02
  11   3  14   13.98    1.02
  11  -3  12    1.96    0.40
  11  -3  12    1.36    0.35
  11   3  12    0.60    0.32
  11  -3  10   21.66    1.29
  11  -3  10   20.91    1.26
  11   3  10   23.68    1.34
  11  -3   8   18.98    1.11
  11  -3   8   19.42    1.15
  11   3   8   18.20    1.14
  11  -3   6   39.60    1.94
  11  -3   6   40.02    1.99
  11   3   6   37.11    1.98
  11  -3   4   36.16    1.74
  11  -3   4   34.05    1.80
  11   3   4   33.98    1.79
  11  -3   2    6.41    0.65
  11  -3   2    6.09    0.50
  11   3   2    7.36    0.59
  11  -3   0    5.04    0.43
  11  -3   0    4.83    0.56
  11   3   0    5.48    0.48
  11   3   0    5.02    0.55
  11  -3  -2    0.39    0.18
  11  -3  -2    0.17    0.21
  11   3  -2    0.35    0.19
  11   3  -2    0.40    0.22
  11  -3  -4    0.57    0.25
  11  -3  -4    0.61    0.19
  11   3  -4    0.59    0.25
  11   3  -4    0.41    0.21
  11  -3  -6    6.73    0.68
  11  -3  -6    7.07    0.52
  11   3  -6    8.08    0.62
  11  -3  -8   12.68    0.86
  11   3  -8   10.93    0.81
  11  -3 -10   14.78    1.00
  11   3 -10   14.81    1.00
  11  -3 -12   18.36    1.16
  11   3 -12   17.52    1.15
  11  -3 -14   25.27    1.46
  11   3 -14   24.01    1.45
  11  -3 -16   14.94    1.03
  11   3 -16   14.14    1.04
  11  -3 -18   12.07    0.94
  11   3 -18   11.20    0.94
  11  -3 -20    8.16    0.86
  11   3 -20   10.28    0.97
  11  -3 -22   23.23    1.48
  11   3 -22   24.19    1.52
  11  -3 -24   10.87    1.05
  11   3 -24   12.60    1.17
  11  -3 -26    9.88    1.01
  11   3 -26   10.19    1.07
  11  -3 -28    2.07    0.52
  11   3 -28    2.87    0.62
  11   3 -30    6.45    0.91
  11   4  25    1.58    0.59
  11   4  25    1.64    0.61
  11   4  23    2.06    0.61
  11   4  23    1.86    0.61
  11   4  21    1.91    0.56
  11   4  21    1.83    0.55
  11   4  19    2.55    0.60
  11   4  19    2.56    0.57
  11  -4  17    1.61    0.46
  11   4  17    2.27    0.58
  11   4  17    2.01    0.49
  11  -4  15    2.08    0.46
  11   4  15    2.23    0.53
  11   4  15    1.51    0.41
  11  -4  13    0.51    0.31
  11   4  13    0.49    0.35
  11   4  13    0.61    0.32
  11  -4  11    1.84    0.41
  11   4  11    2.50    0.48
  11  -4   9    1.19    0.35
  11   4   9    0.94    0.33
  11  -4   7    6.57    0.71
  11   4   7    6.44    0.68
  11  -4   5   12.48    0.91
  11   4   5   12.86    0.88
  11  -4   3    9.43    0.80
  11   4   3   11.78    0.81
  11  -4   1   14.02    1.00
  11   4   1   14.97    0.96
 -11  -4   1   43.01    2.10
  11  -4  -1   42.58    2.20
  11   4  -1   43.93    2.07
  11   4  -1   41.01    2.13
 -11  -4   3   26.30    1.50
  11  -4  -3   29.48    1.59
  11   4  -3   27.75    1.52
  11  -4  -5   21.28    1.32
 -11  -4   5   23.75    1.33
  11   4  -5   21.81    1.29
 -11  -4   7   17.73    1.16
  11  -4  -7   17.65    1.15
  11  -4  -9   17.82    1.18
 -11  -4   9   19.32    1.23
  11  -4 -11   16.99    1.12
 -11  -4  11   16.55    1.17
 -11  -4  13    4.07    0.64
  11  -4 -13    3.65    0.56
  11  -4 -15   11.99    0.91
 -11  -4  15   10.35    1.04
 -11  -4  17    4.02    0.66
  11  -4 -17    4.52    0.62
  11   4 -17    4.52    0.65
 -11  -4  19    0.27    0.34
  11  -4 -19   -0.02    0.28
  11   4 -19    0.34    0.32
  11  -4 -21    1.97    0.47
  11   4 -21    2.55    0.56
  11  -4 -23    1.09    0.44
  11   4 -23    1.10    0.45
  11  -4 -25    1.45    0.48
  11   4 -25    1.73    0.55
  11   4 -27    5.64    0.83
  11   5  22    0.19    0.45
  11  -5  20    1.02    0.49
  11   5  20    0.61    0.45
  11  -5  18    4.53    0.73
  11   5  18    4.62    0.84
  11  -5  16    6.93    0.84
  11   5  16    6.07    0.92
  11  -5  14    6.02    0.79
  11   5  14    7.71    1.00
  11  -5  12    8.35    0.89
  11   5  12    8.01    1.01
  11   5  12    8.39    0.83
  11  -5  10    8.81    0.93
  11   5  10   10.31    0.84
  11   5  10   12.21    1.20
  11  -5   8    2.81    0.52
  11   5   8    1.72    0.52
  11   5   8    2.18    0.43
  11  -5   6    6.73    0.79
  11   5   6    7.89    0.74
  11   5   6    6.48    0.86
  11  -5   4    2.11    0.45
  11   5   4    2.54    0.44
  11   5   4    2.21    0.54
  11  -5   2    4.56    0.62
  11   5   2    3.93    0.64
  11   5   2    5.50    0.60
  11  -5   0    0.98    0.34
  11   5   0    1.31    0.35
  11   5   0    1.43    0.44
  11  -5  -2    0.17    0.26
  11   5  -2    0.21    0.24
  11   5  -2    0.03    0.31
  11  -5  -4    0.28    0.26
 -11  -5   4    0.33    0.28
  11   5  -4    0.10    0.22
  11   5  -4   -0.03    0.27
  11  -5  -6   -0.09    0.24
 -11  -5   6    0.20    0.28
  11   5  -6   -0.32    0.21
  11   5  -6   -0.14    0.24
  11  -5  -8    0.60    0.31
 -11  -5   8    0.72    0.36
  11   5  -8    1.09    0.36
 -11  -5  10    6.73    0.79
  11  -5 -10    5.44    0.70
  11  -5 -12    6.17    0.75
 -11  -5  12    6.78    0.83
  11  -5 -14   19.07    1.28
 -11  -5  14   19.03    1.37
  11  -5 -16   14.93    1.12
 -11  -5  16   16.13    1.25
 -11  -5  18   20.35    1.48
  11  -5 -18   20.24    1.38
  11  -5 -20    8.85    0.94
 -11  -5  22    7.16    0.98
  11  -5 -22    7.73    0.89
 -11  -5  24    4.43    0.80
  11  -5 -24    3.91    0.69
  11   5 -24    6.04    0.86
  11  -6  19    0.87    0.50
  11   6  19    0.39    0.49
  11  -6  17    1.44    0.55
  11   6  17    2.32    0.67
  11  -6  15    0.86    0.46
  11   6  15    0.68    0.49
  11  -6  13   -0.29    0.30
  11   6  13    0.23    0.43
  11  -6  11    0.24    0.37
  11   6  11   -0.12    0.38
  11  -6   9    0.76    0.40
  11   6   9    0.31    0.39
  11  -6   7    3.24    0.59
  11   6   7    2.74    0.63
  11  -6   5    1.34    0.42
  11   6   5    1.30    0.49
  11  -6   3    5.87    0.77
  11   6   3    6.32    0.88
  11  -6   1    3.37    0.58
  11   6   1    2.30    0.56
  11  -6  -1    3.27    0.58
  11   6  -1    4.44    0.71
  11  -6  -3   11.67    0.97
  11   6  -3   10.89    1.09
  11  -6  -5   17.10    1.21
  11   6  -5   15.80    1.22
  11  -6  -7    9.67    0.98
 -11  -6   7    9.39    0.99
 -11  -6   9   10.36    1.05
  11  -6  -9   10.50    1.02
 -11  -6  11    5.29    0.79
  11  -6 -11    6.59    0.79
 -11  -6  13    1.36    0.49
  11  -6 -13    1.75    0.47
 -11  -6  15    0.49    0.41
  11  -6 -15    0.89    0.41
  11  -6 -17   -0.12    0.31
 -11  -6  17   -0.14    0.35
 -11   6  17    0.26    0.41
 -11  -6  19    0.32    0.44
  11  -6 -19    0.94    0.40
 -11   6  19    0.44    0.47
  11  -6 -21    1.01    0.44
 -11  -6  21    0.98    0.51
 -11   6  21    0.73    0.53
  11   7  14    4.44    0.90
  11   7  12    3.37    0.80
  11  -7  10    1.43    0.52
  11   7  10    2.41    0.68
  11  -7   8    5.24    0.81
  11   7   8    4.12    0.84
  11  -7   6    3.00    0.64
  11   7   6    2.40    0.68
  11  -7   4    0.70    0.42
  11   7   4    1.69    0.59
  11  -7   2    1.16    0.46
  11   7   2    0.45    0.41
  11  -7   0    2.09    0.52
  11   7   0    1.44    0.53
  11  -7  -2    0.31    0.34
  11   7  -2   -0.06    0.34
  11  -7  -4    0.09    0.35
  11   7  -4   -0.45    0.30
  11  -7  -6    0.43    0.35
  11  -7  -8    2.73    0.58
  11  -7 -10    2.44    0.57
 -11  -7  10    2.43    0.60
  11  -7 -12    4.29    0.72
 -11  -7  12    4.26    0.78
 -11  -7  14    1.53    0.58
  11  -7 -14    2.69    0.58
 -11  -7  16    1.88    0.63
  11  -7 -16    2.96    0.62
  11  -7 -18    3.28    0.64
 -11   7  18    2.32    0.69
 -11   7  20    2.25    0.71
  11   8   5   -0.03    0.45
  11   8   3    0.83    0.54
  11   8   1    3.44    0.78
  11   8  -1    1.39    0.58
  12   0  28    3.49    0.80
  12   0  26    4.45    0.81
  12   0  24    1.48    0.56
  12   0  22    4.96    0.78
  12   0  20    8.17    0.93
  12   0  18    4.67    0.70
  12   0  16    0.03    0.25
  12   0  14    1.99    0.44
  12   0  12    1.43    0.35
  12   0  10    3.75    0.51
  12   0   8    6.60    0.67
  12   0   8    7.50    0.50
  12   0   6    4.88    0.40
  12   0   6    4.56    0.52
  12   0   4    6.25    0.48
  12   0   4    7.36    0.59
  12   0   2   12.61    0.85
  12   0   2   14.28    0.80
  12   0   0    1.81    0.29
  12   0   0    1.72    0.32
  12   0  -2   20.41    1.11
  12   0  -2   20.47    1.15
  12   0  -4    0.06    0.17
  12   0  -4    0.15    0.17
  12   0  -6   47.08    2.25
  12   0  -8    6.66    0.56
  12   0 -10    2.25    0.37
  12   0 -12    0.81    0.27
  12   0 -14    7.20    0.71
  12   0 -16    0.28    0.26
  12   0 -18    0.03    0.23
  12   0 -20    0.16    0.29
  12   0 -22    0.11    0.27
  12   0 -24    0.35    0.34
  12   0 -26    4.52    0.71
  12   0 -28    4.35    0.72
  12   0 -30    2.44    0.57
  12   0 -32    0.15    0.39
  12   0 -34   -0.24    0.34
  12  -1  29    0.04    0.47
  12   1  29    0.17    0.47
  12  -1  27    0.57    0.52
  12   1  27    1.02    0.57
  12  -1  25    1.30    0.55
  12   1  25    0.50    0.49
  12  -1  23    0.79    0.46
  12   1  23    1.77    0.59
  12  -1  21    4.56    0.72
  12   1  21    3.27    0.67
  12  -1  19    4.90    0.71
  12   1  19    4.29    0.69
  12  -1  17    4.71    0.69
  12   1  17    7.08    0.79
  12  -1  15   12.77    1.01
  12   1  15   14.60    1.05
  12  -1  13   15.65    1.04
  12   1  13   12.89    1.01
  12  -1  11   18.00    1.12
  12   1  11   15.24    1.07
  12  -1   9    4.99    0.48
  12  -1   9    4.33    0.54
  12   1   9    4.62    0.55
  12  -1   7   11.75    0.79
  12  -1   7    9.96    0.69
  12   1   7   11.44    0.80
  12  -1   5    0.59    0.21
  12  -1   5    0.48    0.22
  12   1   5    0.66    0.26
  12   1   5    0.73    0.18
  12  -1   3    9.16    0.63
  12  -1   3    9.19    0.66
  12   1   3    9.72    0.59
  12   1   3    9.27    0.70
  12  -1   1    3.68    0.44
  12  -1   1    3.86    0.43
  12   1   1    4.25    0.41
  12   1   1    5.09    0.54
  12  -1  -1    2.57    0.37
  12  -1  -1    2.49    0.36
  12   1  -1    1.94    0.29
  12   1  -1    1.49    0.31
  12  -1  -3   15.77    0.95
  12  -1  -3   16.20    0.95
  12   1  -3   16.24    0.99
  12   1  -3   16.33    0.92
  12  -1  -5   24.94    1.34
  12   1  -5   25.63    1.33
  12  -1  -7   11.91    0.83
  12   1  -7   13.60    0.83
  12  -1  -9    0.98    0.28
  12   1  -9    0.41    0.25
  12  -1 -11    6.43    0.65
  12   1 -11    6.10    0.63
  12  -1 -13    2.37    0.42
  12   1 -13    4.25    0.55
  12  -1 -15    1.77    0.39
  12   1 -15    0.93    0.31
  12  -1 -17    0.79    0.31
  12   1 -17    0.64    0.30
  12  -1 -19    0.37    0.28
  12   1 -19    0.23    0.29
  12  -1 -21    2.47    0.48
  12   1 -21    3.39    0.55
  12  -1 -23    0.21    0.29
  12   1 -23    0.77    0.37
  12  -1 -25    1.07    0.39
  12   1 -25    0.73    0.39
  12  -1 -27    1.05    0.43
  12   1 -27    0.83    0.39
  12  -1 -29    0.75    0.45
  12   1 -29    0.93    0.46
  12  -1 -31    0.92    0.48
  12   1 -31    1.20    0.50
  12  -1 -33    0.01    0.41
  12   1 -33    0.04    0.40
  12  -2  28    0.84    0.56
  12   2  28    1.51    0.63
  12  -2  26    1.69    0.58
  12   2  26    2.78    0.69
  12  -2  24    3.20    0.68
  12   2  24    2.48    0.64
  12  -2  22    5.42    0.79
  12   2  22    3.51    0.70
  12  -2  20    2.86    0.61
  12   2  20    2.95    0.62
  12  -2  18    4.76    0.71
  12   2  18    5.20    0.71
  12  -2  16    1.77    0.45
  12   2  16    1.52    0.45
  12  -2  14    3.80    0.57
  12   2  14    3.66    0.56
  12  -2  12    0.48    0.29
  12  -2  12    0.55    0.25
  12   2  12    0.37    0.30
  12  -2  10    4.65    0.57
  12  -2  10    5.44    0.57
  12   2  10    6.29    0.67
  12  -2   8    1.59    0.32
  12  -2   8    1.58    0.35
  12   2   8    1.51    0.37
  12  -2   6    3.40    0.45
  12  -2   6    3.88    0.46
  12   2   6    4.03    0.51
  12  -2   4    8.85    0.67
  12  -2   4    9.08    0.68
  12   2   4   10.63    0.74
  12  -2   2   16.05    0.95
  12  -2   2   15.75    0.92
  12   2   2   14.40    0.81
  12   2   2   14.39    0.96
  12  -2   0    8.46    0.61
  12  -2   0    8.92    0.66
  12   2   0    8.00    0.66
  12   2   0    7.70    0.55
  12  -2  -2   19.02    1.02
  12  -2  -2   19.24    1.08
  12   2  -2   16.15    0.97
  12   2  -2   16.89    1.07
  12  -2  -4    4.05    0.45
  12  -2  -4    3.63    0.48
  12   2  -4    4.05    0.46
  12   2  -4    5.40    0.57
  12  -2  -6   32.00    1.69
  12   2  -6   32.42    1.64
  12  -2  -8   12.12    0.85
  12   2  -8   12.85    0.83
  12  -2 -10    3.68    0.50
  12   2 -10    3.17    0.46
  12  -2 -12    3.34    0.48
  12   2 -12    3.23    0.48
  12  -2 -14    6.80    0.71
  12   2 -14    5.36    0.64
  12  -2 -16    2.12    0.43
  12   2 -16    2.29    0.45
  12  -2 -18    1.09    0.36
  12   2 -18    1.27    0.38
  12  -2 -20    0.23    0.29
  12   2 -20    0.56    0.32
  12  -2 -22    3.13    0.56
  12   2 -22    2.79    0.54
  12  -2 -24    0.15    0.30
  12   2 -24   -0.03    0.30
  12  -2 -26    0.34    0.38
  12   2 -26    0.76    0.41
  12  -2 -28    2.21    0.56
  12   2 -28    1.42    0.51
  12  -2 -30    0.84    0.43
  12   2 -30    0.83    0.48
  12  -2 -32    0.33    0.43
  12   2 -32    0.43    0.43
  12  -3  27   -0.61    0.42
  12   3  27    0.21    0.50
  12  -3  25    0.86    0.46
  12   3  25   -0.33    0.41
  12  -3  23    1.48    0.54
  12   3  23    1.86    0.56
  12   3  23    2.31    0.60
  12  -3  21    1.71    0.51
  12   3  21    2.19    0.56
  12   3  21    1.90    0.53
  12  -3  19    4.29    0.69
  12   3  19    3.20    0.64
  12  -3  17    3.08    0.57
  12   3  17    3.48    0.62
  12  -3  15    3.58    0.54
  12  -3  15    3.21    0.56
  12   3  15    2.56    0.51
  12  -3  13    2.87    0.49
  12  -3  13    2.62    0.47
  12   3  13    2.72    0.51
  12  -3  11   13.23    0.87
  12  -3  11   10.96    0.83
  12   3  11    8.64    0.90
  12  -3   9   18.09    1.11
  12  -3   9   16.84    1.12
  12   3   9   19.82    1.19
  12  -3   7   17.60    1.05
  12  -3   7   16.96    1.07
  12   3   7   16.42    1.09
  12  -3   5    4.29    0.54
  12  -3   5    4.88    0.52
  12   3   5    4.60    0.55
  12  -3   3    1.91    0.37
  12  -3   3    3.12    0.40
  12   3   3    2.21    0.40
  12  -3   1    7.56    0.64
  12  -3   1    7.67    0.57
  12   3   1    7.71    0.65
  12  -3  -1    0.80    0.29
  12  -3  -1    1.02    0.25
  12   3  -1    1.85    0.30
  12   3  -1    1.57    0.36
  12  -3  -3    5.48    0.46
  12  -3  -3    6.15    0.66
  12   3  -3    4.92    0.58
  12   3  -3    6.91    0.54
  12  -3  -5    7.49    0.73
  12  -3  -5    7.08    0.52
  12   3  -5    6.15    0.65
  12   3  -5    6.86    0.59
  12  -3  -7    1.36    0.34
  12  -3  -7    1.11    0.26
  12   3  -7    1.44    0.32
  12  -3  -9    9.60    0.76
  12   3  -9    7.84    0.68
  12  -3 -11    6.48    0.70
  12   3 -11    5.79    0.65
  12  -3 -13    3.38    0.54
  12   3 -13    3.05    0.49
  12  -3 -15    2.08    0.44
  12   3 -15    1.23    0.36
  12  -3 -17    0.36    0.30
  12   3 -17    0.23    0.27
  12  -3 -19    1.31    0.40
  12   3 -19    0.45    0.31
  12  -3 -21   -0.07    0.28
  12   3 -21    0.16    0.29
  12  -3 -23    0.32    0.34
  12   3 -23   -0.20    0.28
  12  -3 -25    0.40    0.38
  12   3 -25    0.63    0.39
  12  -3 -27    0.08    0.34
  12   3 -27   -0.19    0.31
  12  -3 -29    0.26    0.38
  12   3 -29    0.71    0.43
  12   4  24    1.87    0.60
  12   4  24    1.46    0.56
  12   4  22    5.13    0.88
  12   4  22    6.02    0.88
  12   4  20    2.61    0.61
  12   4  20    2.75    0.65
  12   4  18    1.73    0.52
  12   4  18    2.26    0.53
  12  -4  16    1.04    0.41
  12   4  16    0.57    0.36
  12   4  16    0.78    0.42
  12  -4  14    0.16    0.28
  12   4  14    0.30    0.33
  12  -4  12   -0.02    0.26
  12   4  12    0.24    0.31
  12  -4  10    4.29    0.60
  12   4  10    4.15    0.59
  12  -4   8    0.84    0.34
  12   4   8    0.46    0.30
  12  -4   6    1.62    0.41
  12   4   6    2.41    0.43
  12  -4   4    6.83    0.73
  12   4   4    7.10    0.71
  12  -4   2   12.61    0.96
  12   4   2   14.65    0.97
  12  -4   0    4.73    0.59
  12   4   0    3.47    0.50
  12  -4  -2    3.92    0.55
  12   4  -2    3.45    0.45
  12   4  -2    2.01    0.40
  12  -4  -4    4.16    0.56
  12   4  -4    4.86    0.56
  12   4  -4    4.97    0.58
  12  -4  -6    4.66    0.61
  12   4  -6    2.44    0.42
  12   4  -6    2.81    0.46
  12  -4  -8    0.94    0.35
  12   4  -8    0.93    0.31
  12  -4 -10    4.78    0.64
  12   4 -10    5.99    0.68
  12  -4 -12    7.15    0.78
  12   4 -12    7.74    0.80
  12  -4 -14    8.83    0.89
  12   4 -14    8.70    0.89
  12  -4 -16    3.42    0.56
  12   4 -16    2.68    0.53
  12  -4 -18    0.45    0.33
  12   4 -18    2.58    0.53
  12  -4 -20    1.14    0.42
  12   4 -20    0.93    0.40
  12  -4 -22    0.17    0.32
  12   4 -22    0.24    0.34
  12  -4 -24    0.22    0.37
  12   4 -24    0.98    0.43
  12  -4 -26    1.64    0.52
  12   4 -26    0.74    0.42
  12   4 -28   -0.08    0.40
  12   5  21    0.07    0.41
  12  -5  19    0.55    0.44
  12   5  19    0.64    0.49
  12  -5  17    2.57    0.59
  12   5  17    3.19    0.71
  12  -5  15    3.72    0.64
  12   5  15    3.83    0.75
  12  -5  13    4.93    0.69
  12   5  13    4.39    0.76
  12   5  13    3.28    0.58
  12  -5  11    3.75    0.62
  12   5  11    3.21    0.68
  12   5  11    4.06    0.61
  12  -5   9    2.84    0.55
  12   5   9    3.53    0.55
  12   5   9    3.55    0.68
  12  -5   7    2.62    0.52
  12   5   7    2.80    0.60
  12   5   7    3.31    0.51
  12  -5   5   -0.03    0.25
  12   5   5    0.91    0.32
  12   5   5    0.29    0.34
  12  -5   3    2.13    0.47
  12   5   3    1.75    0.49
  12   5   3    1.17    0.35
  12  -5   1    0.56    0.32
  12   5   1    0.57    0.31
  12   5   1    0.34    0.32
  12  -5  -1    0.99    0.36
  12   5  -1    0.66    0.36
  12   5  -1    0.21    0.27
  12  -5  -3    0.87    0.34
  12   5  -3    0.40    0.30
  12   5  -3    0.61    0.30
  12  -5  -5    0.67    0.32
 -12  -5   5   -0.14    0.27
  12   5  -5    0.25    0.27
  12   5  -5    0.33    0.31
  12  -5  -7    0.67    0.32
 -12  -5   7    0.86    0.38
  12   5  -7    1.23    0.39
  12   5  -7    0.60    0.31
  12  -5  -9    4.26    0.64
 -12  -5   9    5.63    0.73
  12  -5 -11    1.13    0.38
 -12  -5  11    0.87    0.39
  12  -5 -13    1.94    0.48
 -12  -5  13    1.19    0.43
  12  -5 -15    0.94    0.38
 -12  -5  15    1.59    0.51
 -12  -5  17    1.20    0.48
  12  -5 -17    1.13    0.44
  12  -5 -19   -0.02    0.28
 -12  -5  19   -0.26    0.31
  12   5 -19    0.43    0.34
 -12  -5  21    0.83    0.45
  12  -5 -21    1.53    0.50
  12   5 -21    2.22    0.54
  12  -5 -23    1.42    0.49
  12   5 -23    0.60    0.41
  12  -5 -25    0.47    0.44
  12   5 -25    0.58    0.43
  12  -6  18    0.13    0.42
  12   6  18    0.62    0.49
  12  -6  16    1.15    0.52
  12   6  16    1.43    0.57
  12  -6  14    0.14    0.39
  12   6  14   -0.25    0.36
  12  -6  12   -0.22    0.33
  12   6  12    0.02    0.40
  12  -6  10    0.25    0.37
  12   6  10    0.03    0.38
  12  -6   8    0.44    0.36
  12   6   8    0.46    0.44
  12  -6   6    1.32    0.44
  12   6   6    1.28    0.48
  12  -6   4    3.69    0.64
  12   6   4    2.62    0.64
  12  -6   2    0.22    0.30
  12   6   2    0.55    0.40
  12  -6   0    1.83    0.46
  12   6   0    0.60    0.40
  12  -6  -2    4.76    0.70
  12   6  -2    4.23    0.70
  12  -6  -4    1.12    0.41
  12   6  -4    2.36    0.54
  12  -6  -6    2.96    0.58
  12   6  -6    3.42    0.61
 -12  -6   8    2.12    0.54
  12  -6  -8    1.97    0.49
  12  -6 -10    1.23    0.43
 -12  -6  10    0.27    0.37
 -12  -6  12    0.04    0.38
  12  -6 -12   -0.07    0.29
  12  -6 -14   -0.24    0.27
 -12  -6  14   -0.15    0.36
  12  -6 -16    0.65    0.38
 -12  -6  16    0.26    0.42
  12  -6 -18    2.10    0.54
 -12  -6  18    2.19    0.61
  12  -6 -20    0.47    0.38
 -12  -6  20    0.12    0.44
  12  -6 -22    0.53    0.42
  12   7  13    2.03    0.73
  12   7  11    1.57    0.61
  12  -7   9    1.30    0.49
  12   7   9    1.66    0.65
  12  -7   7    2.44    0.60
  12   7   7    1.89    0.62
  12  -7   5    0.07    0.37
  12   7   5    0.53    0.48
  12  -7   3    2.76    0.61
  12   7   3    1.91    0.61
  12  -7   1    0.08    0.34
  12   7   1   -0.13    0.37
  12  -7  -1    0.60    0.40
  12   7  -1    0.82    0.48
  12  -7  -3   -0.12    0.30
  12   7  -3   -0.05    0.33
  12  -7  -5    0.68    0.40
  12  -7  -7    0.38    0.37
  12  -7  -9    0.14    0.32
  12  -7 -11    0.36    0.40
 -12  -7  11    0.34    0.43
  12  -7 -13    0.82    0.43
 -12  -7  13    0.33    0.42
  12  -7 -15    0.64    0.44
 -12  -7  15    0.27    0.49
  12  -7 -17    0.71    0.45
  12   8   2    0.77    0.54
  12   8   0    1.15    0.58
  12   8  -2    0.32    0.49
  13   0  27   -0.34    0.43
  13   0  25   -0.02    0.40
  13   0  23    2.00    0.60
  13   0  21    1.98    0.57
  13   0  19    4.52    0.71
  13   0  17    1.06    0.40
  13   0  15    0.23    0.27
  13   0  13    0.24    0.26
  13   0  11    2.34    0.45
  13   0   9    0.08    0.23
  13   0   7    2.12    0.40
  13   0   5   46.61    2.37
  13   0   5   49.45    2.23
  13   0   3   28.70    1.45
  13   0   3   30.01    1.59
  13   0   1   13.42    0.81
  13   0   1   13.12    0.87
  13   0  -1   32.02    1.59
  13   0  -1   32.09    1.68
  13   0  -3   50.03    2.39
  13   0  -3   51.47    2.47
  13   0  -5   18.64    1.07
  13   0  -7   12.17    0.81
  13   0  -9   59.73    2.82
  13   0 -11   22.75    1.31
  13   0 -13    9.59    0.76
  13   0 -15    0.61    0.28
  13   0 -17    4.27    0.59
  13   0 -19    2.75    0.51
  13   0 -21    1.63    0.43
  13   0 -23    0.69    0.36
  13   0 -25    0.27    0.35
  13   0 -27    8.83    0.99
  13   0 -29    2.95    0.61
  13   0 -31   11.36    1.18
  13   0 -33    6.04    0.87
  13  -1  28    0.28    0.52
  13   1  28    0.14    0.49
  13  -1  26   -0.24    0.43
  13   1  26    0.03    0.45
  13  -1  24    0.91    0.48
  13   1  24    0.29    0.43
  13  -1  22    0.19    0.41
  13   1  22    0.40    0.40
  13  -1  20    0.54    0.41
  13   1  20    0.51    0.38
  13  -1  18    0.53    0.36
  13   1  18    0.15    0.33
  13  -1  16    1.11    0.41
  13   1  16    0.96    0.39
  13  -1  14    2.47    0.49
  13   1  14    3.46    0.57
  13  -1  12    9.88    0.81
  13   1  12   10.12    0.83
  13  -1  10   13.86    0.97
  13   1  10   13.53    0.96
  13  -1   8   13.21    0.81
  13  -1   8   12.14    0.87
  13   1   8   13.55    0.92
  13  -1   6    7.88    0.57
  13  -1   6    6.88    0.68
  13   1   6    6.59    0.68
  13  -1   4   12.84    0.84
  13  -1   4   12.92    0.79
  13   1   4   11.59    0.83
  13   1   4   11.10    0.69
  13  -1   2   16.48    1.00
  13  -1   2   14.44    0.93
  13   1   2   18.03    0.90
  13   1   2   15.05    1.01
  13  -1   0   11.12    0.73
  13  -1   0   10.08    0.73
  13   1   0   10.37    0.67
  13   1   0   10.15    0.75
  13  -1  -2   16.82    0.99
  13  -1  -2   16.96    1.00
  13   1  -2   15.77    0.94
  13   1  -2   16.66    1.03
  13  -1  -4   14.52    0.91
  13  -1  -4   14.83    0.91
  13   1  -4   13.79    0.86
  13   1  -4   13.87    0.92
  13  -1  -6    0.38    0.22
  13   1  -6    0.29    0.20
  13  -1  -8    2.63    0.41
  13   1  -8    2.39    0.41
  13  -1 -10   14.93    0.97
  13   1 -10   13.99    0.94
  13  -1 -12    7.20    0.72
  13   1 -12    8.62    0.71
  13  -1 -14   17.24    1.12
  13   1 -14   17.07    1.12
  13  -1 -16   22.28    1.36
  13   1 -16   22.48    1.37
  13  -1 -18   35.74    1.90
  13   1 -18   32.18    1.88
  13  -1 -20   16.20    1.14
  13   1 -20   15.58    1.13
  13  -1 -22   16.43    1.19
  13   1 -22   16.96    1.22
  13  -1 -24   17.49    1.28
  13   1 -24   19.95    1.35
  13  -1 -26    3.08    0.60
  13   1 -26    3.36    0.67
  13  -1 -28    7.30    0.90
  13   1 -28    8.61    1.00
  13  -1 -30    0.39    0.38
  13   1 -30   -0.19    0.33
  13  -1 -32    1.74    0.59
  13   1 -32    2.59    0.65
  13  -2  27    1.52    0.62
  13   2  27    1.12    0.60
  13  -2  25    1.04    0.52
  13   2  25    0.09    0.47
  13  -2  23    0.55    0.43
  13   2  23    0.30    0.46
  13  -2  21    1.15    0.48
  13   2  21    0.81    0.48
  13  -2  19   -0.10    0.34
  13   2  19    0.05    0.34
  13  -2  17    0.51    0.37
  13   2  17    0.53    0.35
  13  -2  15    0.54    0.33
  13   2  15    0.61    0.36
  13  -2  13    0.45    0.30
  13   2  13   -0.30    0.25
  13  -2  11    0.23    0.21
  13  -2  11    0.41    0.28
  13   2  11    0.01    0.24
  13  -2   9    4.97    0.58
  13  -2   9    5.42    0.56
  13   2   9    4.74    0.60
  13  -2   7    4.12    0.49
  13  -2   7    4.53    0.54
  13   2   7    4.00    0.55
  13  -2   5    9.62    0.71
  13  -2   5    9.64    0.72
  13   2   5   10.07    0.78
  13  -2   3   17.01    1.01
  13  -2   3   16.18    1.00
  13   2   3   16.20    1.06
  13  -2   1   27.62    1.48
  13  -2   1   26.10    1.44
  13   2   1   27.69    1.36
  13   2   1   28.27    1.53
  13  -2  -1   15.20    0.98
  13  -2  -1   15.87    0.96
  13   2  -1   16.54    0.92
  13   2  -1   16.40    1.04
  13  -2  -3   29.58    1.54
  13  -2  -3   31.02    1.60
  13   2  -3   29.25    1.51
  13   2  -3   28.58    1.61
  13  -2  -5   37.20    1.81
  13  -2  -5   34.78    1.85
  13   2  -5   35.94    1.88
  13   2  -5   35.36    1.79
  13  -2  -7   34.75    1.86
  13   2  -7   36.15    1.81
  13  -2  -9   22.89    1.32
  13   2  -9   21.63    1.28
  13  -2 -11   11.86    0.89
  13   2 -11   13.15    0.90
  13  -2 -13   13.62    1.01
  13   2 -13   15.55    1.01
  13  -2 -15    2.13    0.45
  13   2 -15    2.78    0.48
  13  -2 -17    1.61    0.44
  13   2 -17    1.79    0.42
  13  -2 -19    0.84    0.36
  13   2 -19    0.72    0.33
  13  -2 -21    0.12    0.28
  13   2 -21    0.24    0.32
  13  -2 -23    4.03    0.64
  13   2 -23    2.76    0.57
  13  -2 -25    2.61    0.57
  13   2 -25    3.29    0.64
  13  -2 -27    6.04    0.83
  13   2 -27    7.72    0.94
  13  -2 -29    4.89    0.77
  13   2 -29    5.80    0.83
  13  -2 -31    5.82    0.86
  13   2 -31    6.85    0.95
  13  -2 -33    5.29    0.84
  13  -3  26    0.05    0.46
  13   3  26   -0.07    0.43
  13  -3  24   -0.23    0.41
  13   3  24   -0.19    0.40
  13   3  24   -0.28    0.42
  13  -3  22    0.88    0.48
  13   3  22    1.12    0.49
  13   3  22    1.01    0.51
  13  -3  20    0.30    0.40
  13   3  20    0.15    0.36
  13  -3  18    0.61    0.42
  13   3  18    1.66    0.51
  13  -3  16    2.37    0.53
  13   3  16    2.85    0.58
  13  -3  14    2.41    0.49
  13  -3  14    2.40    0.47
  13   3  14    1.72    0.46
  13  -3  12    3.25    0.53
  13  -3  12    2.81    0.48
  13   3  12    3.92    0.59
  13  -3  10    0.96    0.34
  13  -3  10    0.58    0.30
  13   3  10    1.23    0.39
  13  -3   8   26.08    1.42
  13  -3   8   23.47    1.41
  13   3   8   24.27    1.47
  13  -3   6   16.39    1.03
  13  -3   6   17.02    1.06
  13   3   6   15.56    1.08
  13  -3   4   10.28    0.72
  13  -3   4   10.38    0.79
  13   3   4   10.15    0.80
  13  -3   2   10.70    0.73
  13  -3   2    9.88    0.78
  13   3   2   11.37    0.82
  13  -3   0    2.10    0.33
  13  -3   0    2.19    0.40
  13   3   0    1.60    0.38
  13  -3  -2    0.75    0.29
  13  -3  -2    0.79    0.25
  13   3  -2    1.51    0.35
  13   3  -2    1.00    0.27
  13  -3  -4    9.05    0.65
  13  -3  -4    8.36    0.73
  13   3  -4    9.38    0.69
  13   3  -4   10.48    0.78
  13  -3  -6    2.10    0.34
  13  -3  -6    2.00    0.41
  13   3  -6    2.33    0.40
  13  -3  -8    0.83    0.30
  13   3  -8    0.32    0.26
  13  -3 -10    0.45    0.27
  13   3 -10    0.35    0.27
  13  -3 -12   11.05    0.88
  13   3 -12   10.10    0.84
  13  -3 -14    8.60    0.88
  13   3 -14    9.40    0.80
  13  -3 -16   15.21    1.11
  13   3 -16   15.21    1.09
  13  -3 -18   19.15    1.25
  13   3 -18   15.47    1.18
  13  -3 -20   22.97    1.50
  13   3 -20   25.07    1.56
  13  -3 -22   11.89    1.00
  13   3 -22   11.38    1.12
  13  -3 -24    9.22    0.99
  13   3 -24    8.88    1.00
  13  -3 -26    5.47    0.79
  13   3 -26    6.76    0.88
  13  -3 -28    8.76    1.04
  13   3 -28   10.44    1.14
  13  -3 -30    3.63    0.71
  13   4  23    0.42    0.46
  13   4  23    0.29    0.43
  13   4  21    3.82    0.74
  13   4  21    2.96    0.65
  13   4  19    1.69    0.54
  13   4  19    2.35    0.60
  13   4  17    1.56    0.48
  13   4  17    1.54    0.55
  13  -4  15    0.29    0.32
  13   4  15    0.16    0.34
  13  -4  13    0.57    0.34
  13   4  13    1.23    0.43
  13  -4  11    1.21    0.38
  13   4  11    1.31    0.41
  13  -4   9    9.43    0.90
  13   4   9    9.23    0.80
  13  -4   7    0.45    0.29
  13   4   7    0.28    0.30
  13  -4   5    1.94    0.43
  13   4   5    2.38    0.46
  13  -4   3    5.61    0.67
  13   4   3    5.27    0.63
  13  -4   1   17.41    1.15
  13   4   1   17.05    1.12
  13  -4  -1   10.04    0.82
  13   4  -1   10.25    0.81
  13  -4  -3    7.02    0.75
  13   4  -3    6.98    0.71
  13  -4  -5   10.03    0.81
  13   4  -5   10.05    0.75
  13   4  -5    8.29    0.74
  13  -4  -7   19.98    1.30
  13   4  -7   20.86    1.25
  13  -4  -9   10.14    0.96
  13   4  -9   10.39    0.83
  13  -4 -11    4.34    0.60
  13   4 -11    3.89    0.57
  13  -4 -13   20.46    1.34
  13   4 -13   20.69    1.33
  13  -4 -15    9.43    0.94
  13  -4 -17    0.07    0.31
  13   4 -17    0.12    0.29
  13  -4 -19    0.10    0.31
  13   4 -19    0.51    0.36
  13  -4 -21    0.77    0.41
  13   4 -21    0.25    0.33
  13  -4 -23    0.32    0.38
  13   4 -23    0.26    0.35
  13  -4 -25    3.83    0.72
  13   4 -25    4.26    0.73
  13  -4 -27    5.27    0.81
  13   4 -27    3.48    0.71
  13   5  20   -0.16    0.37
  13  -5  18    0.06    0.38
  13   5  18    0.51    0.47
  13  -5  16    0.25    0.38
  13   5  16    0.29    0.39
  13   5  16    0.52    0.45
  13  -5  14    2.83    0.59
  13   5  14    2.29    0.63
  13   5  14    4.01    0.65
  13  -5  12    3.72    0.64
  13   5  12    4.33    0.65
  13   5  12    2.91    0.66
  13  -5  10    1.25    0.41
  13   5  10    1.22    0.48
  13   5  10    0.91    0.39
  13  -5   8    4.96    0.71
  13   5   8    4.89    0.78
  13   5   8    5.96    0.70
  13  -5   6    1.50    0.44
  13   5   6    0.32    0.37
  13   5   6    0.99    0.36
  13  -5   4    0.98    0.37
  13   5   4    1.21    0.39
  13  -5   2    3.51    0.57
  13   5   2    1.83    0.43
  13  -5   0    2.43    0.50
  13   5   0    3.29    0.52
  13  -5  -2    4.27    0.63
  13   5  -2    3.27    0.52
  13  -5  -4    0.20    0.27
  13   5  -4    0.23    0.28
 -13  -5   6    1.16    0.41
  13  -5  -6    0.78    0.37
  13   5  -6    1.96    0.42
  13   5  -6    1.23    0.37
  13  -5  -8    3.42    0.58
 -13  -5   8    3.29    0.58
  13   5  -8    4.91    0.63
  13   5  -8    3.59    0.58
  13   5  -8    4.28    0.59
 -13  -5  10    1.96    0.50
  13  -5 -10    2.18    0.51
  13   5 -10    1.99    0.45
 -13  -5  12   14.02    1.10
  13  -5 -12   14.20    1.08
  13   5 -12   11.73    0.98
 -13  -5  14    7.64    0.92
  13  -5 -14    6.94    0.84
  13   5 -14    7.76    0.85
  13  -5 -16    7.27    0.87
  13   5 -16    6.29    0.81
  13  -5 -18   11.15    1.09
  13   5 -18    8.20    0.97
  13  -5 -20    6.10    0.81
  13   5 -20    6.91    0.88
  13  -5 -22    6.69    0.86
  13   5 -22    7.36    0.96
  13  -5 -24    2.46    0.62
  13   5 -24    2.06    0.56
  13  -5 -26    2.16    0.61
  13  -6  17    0.20    0.43
  13   6  17    0.94    0.54
  13  -6  15   -0.31    0.39
  13   6  15    0.57    0.49
  13  -6  13    0.59    0.43
  13   6  13    0.06    0.41
  13  -6  11    0.04    0.33
  13   6  11    0.69    0.48
  13  -6   9    0.99    0.45
  13   6   9    1.03    0.51
  13  -6   7    1.13    0.43
  13   6   7    1.74    0.56
  13  -6   5    0.42    0.34
  13   6   5    0.45    0.42
  13  -6   3    0.13    0.31
  13   6   3    0.89    0.46
  13  -6   1    4.72    0.71
  13   6   1    5.60    0.82
  13  -6  -1    3.17    0.59
  13   6  -1    3.01    0.63
  13  -6  -3    4.34    0.69
  13   6  -3    3.00    0.63
  13  -6  -5    6.96    0.85
  13   6  -5    5.18    0.76
  13  -6  -7    8.26    0.94
 -13  -6   9    6.37    0.85
  13  -6  -9    6.17    0.80
 -13  -6  11    3.73    0.67
  13  -6 -11    3.39    0.63
  13  -6 -13    3.10    0.61
 -13  -6  13    2.23    0.60
 -13  -6  15    1.28    0.51
  13  -6 -15    0.89    0.44
 -13  -6  17   -0.59    0.36
  13  -6 -17    0.22    0.34
 -13  -6  19    0.28    0.41
  13  -6 -19    0.48    0.39
  13   6 -19    0.16    0.35
  13  -6 -21   -0.28    0.32
  13  -6 -23    0.10    0.42
  13   7  12    2.06    0.68
  13   7  10    1.18    0.59
  13   7   8    0.44    0.53
  13  -7   6    1.59    0.49
  13   7   6    1.29    0.56
  13  -7   4    3.81    0.70
  13   7   4    4.05    0.81
  13  -7   2    0.14    0.37
  13   7   2    0.03    0.43
  13  -7   0    0.47    0.38
  13   7   0    0.59    0.43
  13  -7  -2    0.27    0.36
  13   7  -2   -0.11    0.38
  13  -7  -4   -0.20    0.34
  13   7  -4    0.14    0.39
  13  -7  -6    1.27    0.46
  13  -7  -8    1.29    0.48
  13  -7 -10    0.92    0.45
  13  -7 -12    1.11    0.49
 -13  -7  14    3.59    0.78
  13  -7 -14    2.66    0.64
 -13  -7  16    1.48    0.58
  14   0  26    3.42    0.77
  14   0  24    2.83    0.71
  14   0  22    3.35    0.69
  14   0  20    6.64    0.89
  14   0  18    1.80    0.54
  14   0  16    2.34    0.54
  14   0  14    5.36    0.70
  14   0  12   -0.03    0.25
  14   0  10    0.00    0.25
  14   0   8    6.38    0.70
  14   0   6    1.28    0.34
  14   0   4   16.01    1.06
  14   0   4   17.93    0.97
  14   0   2   12.41    0.87
  14   0   2   11.98    0.77
  14   0   0   14.37    0.85
  14   0   0   13.25    0.92
  14   0  -2    6.62    0.65
  14   0  -2    6.21    0.59
  14   0  -4   27.74    1.54
  14   0  -4   28.94    1.50
  14   0  -6   30.60    1.60
  14   0  -8    2.53    0.41
  14   0 -10   18.69    1.15
  14   0 -12    0.16    0.24
  14   0 -14    0.51    0.29
  14   0 -16    0.57    0.29
  14   0 -18   -0.05    0.22
  14   0 -20    0.49    0.33
  14   0 -22   -0.22    0.26
  14   0 -24    0.02    0.30
  14   0 -26    1.73    0.52
  14   0 -28   -0.21    0.30
  14   0 -30   -0.24    0.35
  14   0 -32    2.74    0.65
  14  -1  27   -0.35    0.45
  14   1  27    0.20    0.48
  14  -1  25    0.68    0.51
  14   1  25    0.52    0.50
  14  -1  23    1.52    0.56
  14   1  23    0.91    0.52
  14  -1  21    4.04    0.73
  14   1  21    2.89    0.66
  14  -1  19    3.02    0.62
  14   1  19    2.75    0.61
  14  -1  17    6.77    0.85
  14   1  17    8.59    0.95
  14  -1  15    9.74    0.98
  14   1  15   10.70    0.90
  14  -1  13    7.70    0.81
  14   1  13    7.82    0.86
  14  -1  11    8.18    0.84
  14   1  11   10.07    0.82
  14  -1   9   11.91    0.89
  14   1   9   11.91    0.91
  14  -1   7   14.53    0.88
  14  -1   7   14.34    0.97
  14   1   7   14.06    0.98
  14  -1   5   11.50    0.74
  14  -1   5    9.94    0.78
  14   1   5   10.23    0.79
  14  -1   3    4.73    0.52
  14  -1   3    4.93    0.55
  14   1   3    5.15    0.60
  14   1   3    5.25    0.48
  14  -1   1    8.67    0.66
  14  -1   1    8.67    0.69
  14   1   1    7.96    0.60
  14   1   1   10.03    0.73
  14  -1  -1   13.65    0.87
  14  -1  -1   12.41    0.85
  14   1  -1   13.16    0.80
  14   1  -1   12.93    0.91
  14  -1  -3    0.88    0.28
  14  -1  -3    1.59    0.33
  14   1  -3    0.68    0.28
  14   1  -3    1.10    0.28
  14  -1  -5    2.45    0.39
  14  -1  -5    1.87    0.38
  14   1  -5    2.53    0.44
  14   1  -5    2.95    0.40
  14  -1  -7    0.90    0.29
  14   1  -7    0.50    0.23
  14  -1  -9    2.64    0.44
  14   1  -9    2.99    0.46
  14  -1 -11    9.45    0.78
  14   1 -11   10.68    0.80
  14  -1 -13    6.10    0.68
  14   1 -13    5.50    0.66
  14  -1 -15    4.52    0.63
  14   1 -15    5.60    0.68
  14  -1 -17    1.29    0.39
  14   1 -17    1.74    0.45
  14  -1 -19    5.36    0.69
  14   1 -19    4.22    0.65
  14  -1 -21    3.03    0.56
  14   1 -21    2.82    0.56
  14  -1 -23    0.74    0.40
  14   1 -23    0.82    0.38
  14  -1 -25    0.52    0.36
  14   1 -25    1.06    0.46
  14  -1 -27    1.46    0.50
  14   1 -27    1.71    0.53
  14  -1 -29    0.20    0.37
  14   1 -29   -0.09    0.38
  14  -1 -31    0.13    0.39
  14   1 -31   -0.23    0.38
  14  -2  26    1.27    0.56
  14   2  26    1.69    0.64
  14  -2  24    3.28    0.70
  14   2  24    1.96    0.63
  14  -2  22    3.12    0.69
  14   2  22    2.08    0.58
  14  -2  20    1.80    0.52
  14   2  20    2.70    0.61
  14  -2  18    2.33    0.54
  14   2  18    2.83    0.60
  14  -2  16    1.80    0.49
  14   2  16    2.45    0.54
  14  -2  14    3.88    0.60
  14   2  14    4.40    0.65
  14  -2  12    0.10    0.27
  14   2  12    0.41    0.30
  14  -2  10    0.05    0.21
  14  -2  10    0.00    0.25
  14   2  10   -0.40    0.23
  14  -2   8    0.73    0.31
  14  -2   8    1.45    0.33
  14   2   8    1.90    0.43
  14  -2   6    4.81    0.58
  14  -2   6    5.48    0.59
  14   2   6    6.82    0.70
  14  -2   4    8.49    0.66
  14  -2   4    6.50    0.66
  14   2   4    7.56    0.75
  14  -2   2   11.71    0.83
  14  -2   2   12.02    0.82
  14   2   2   12.42    0.89
  14  -2   0   14.47    0.96
  14  -2   0   14.76    0.98
  14   2   0   15.98    0.89
  14   2   0   15.82    1.03
  14  -2  -2   29.99    1.66
  14  -2  -2   29.69    1.68
  14   2  -2   34.54    1.62
  14   2  -2   34.03    1.76
  14  -2  -4   14.46    0.97
  14  -2  -4   14.64    0.92
  14   2  -4   15.34    0.92
  14   2  -4   14.10    0.98
  14  -2  -6   16.69    1.04
  14  -2  -6   17.60    1.11
  14   2  -6   18.29    1.08
  14  -2  -8   11.54    0.86
  14   2  -8   12.01    0.85
  14  -2 -10    0.71    0.30
  14   2 -10    2.08    0.40
  14  -2 -12    4.11    0.58
  14   2 -12    5.00    0.61
  14  -2 -14    2.22    0.45
  14   2 -14    0.98    0.34
  14  -2 -16    0.67    0.32
  14   2 -16    0.68    0.33
  14  -2 -18    0.20    0.29
  14   2 -18    0.41    0.32
  14  -2 -20    1.65    0.45
  14   2 -20    0.85    0.39
  14  -2 -22    0.21    0.36
  14   2 -22    0.73    0.37
  14  -2 -24    2.76    0.59
  14   2 -24    1.65    0.49
  14  -2 -26    0.26    0.37
  14   2 -26   -0.02    0.36
  14  -2 -28    0.15    0.36
  14   2 -28    0.48    0.41
  14  -2 -30    0.98    0.48
  14   2 -30    1.54    0.54
  14  -3  25   -0.22    0.45
  14   3  25    0.44    0.46
  14  -3  23    0.15    0.45
  14   3  23    0.15    0.43
  14   3  23    0.47    0.48
  14  -3  21    0.75    0.47
  14   3  21    1.26    0.51
  14  -3  19    5.73    0.81
  14   3  19    5.02    0.81
  14  -3  17    6.48    0.82
  14   3  17    5.27    0.78
  14  -3  15    8.16    0.90
  14   3  15    8.27    0.91
  14  -3  13    4.26    0.63
  14   3  13    5.21    0.72
  14  -3  11    7.77    0.77
  14  -3  11    7.12    0.76
  14   3  11    7.59    0.83
  14  -3   9    9.36    0.76
  14  -3   9    9.11    0.74
  14   3   9    7.31    0.81
  14  -3   7    5.78    0.65
  14  -3   7    6.52    0.66
  14   3   7    6.19    0.71
  14  -3   5   16.32    1.02
  14  -3   5   15.67    1.05
  14   3   5   15.21    1.07
  14  -3   3    9.45    0.79
  14  -3   3    9.48    0.72
  14   3   3   12.00    0.86
  14  -3   1    2.64    0.39
  14  -3   1    1.59    0.38
  14   3   1    2.16    0.41
  14  -3  -1    0.89    0.32
  14  -3  -1    0.96    0.28
  14   3  -1    1.02    0.32
  14  -3  -3   -0.04    0.21
  14  -3  -3   -0.07    0.17
  14   3  -3    0.09    0.20
  14   3  -3    0.14    0.23
  14  -3  -5    1.21    0.30
  14  -3  -5    1.09    0.34
  14   3  -5    1.31    0.36
  14   3  -5    0.85    0.30
  14  -3  -7    3.78    0.45
  14  -3  -7    2.91    0.49
  14   3  -7    3.57    0.48
  14  -3  -9    0.86    0.32
  14   3  -9    0.42    0.29
  14  -3 -11    0.42    0.28
  14   3 -11    0.77    0.32
  14  -3 -13    0.36    0.28
  14   3 -13    0.10    0.25
  14  -3 -15    6.03    0.73
  14   3 -15    4.63    0.65
  14  -3 -17    4.07    0.63
  14   3 -17    3.34    0.58
  14  -3 -19    2.67    0.53
  14   3 -19    3.16    0.58
  14  -3 -21    3.81    0.63
  14   3 -21    4.19    0.67
  14  -3 -23    0.01    0.36
  14   3 -23   -0.03    0.33
  14  -3 -25    2.74    0.63
  14   3 -25    3.64    0.68
  14  -3 -27    0.92    0.45
  14   3 -27    0.87    0.45
  14  -3 -29    0.25    0.42
  14   4  22    3.09    0.71
  14   4  22    1.06    0.52
  14   4  20    2.97    0.70
  14   4  20    3.33    0.69
  14   4  18    2.11    0.56
  14   4  18    2.32    0.65
  14   4  16    0.66    0.41
  14  -4  14   -0.23    0.27
  14   4  14    0.38    0.36
  14  -4  12    0.34    0.33
  14   4  12    0.09    0.32
  14  -4  10    1.47    0.42
  14   4  10    1.45    0.42
  14  -4   8    4.75    0.64
  14   4   8    4.05    0.59
  14  -4   6    4.70    0.63
  14   4   6    5.25    0.66
  14  -4   4    3.19    0.53
  14   4   4    1.21    0.36
  14  -4   2    6.67    0.75
  14   4   2    6.49    0.73
  14  -4   0    8.10    0.85
  14   4   0    9.22    0.76
  14  -4  -2    6.95    0.76
  14   4  -2    7.85    0.79
  14  -4  -4    7.35    0.77
  14   4  -4    5.47    0.67
  14  -4  -6    7.97    0.84
  14   4  -6    8.72    0.74
  14   4  -6    9.34    0.79
  14  -4  -8    4.34    0.62
  14   4  -8    6.92    0.70
  14  -4 -10    6.74    0.79
  14   4 -10    8.10    0.81
  14  -4 -12    8.97    0.92
  14   4 -12    9.96    0.84
  14  -4 -14    1.66    0.44
  14   4 -14    2.98    0.54
  14  -4 -16    6.13    0.79
  14   4 -16    4.92    0.69
  14  -4 -18    0.60    0.38
  14   4 -18   -0.03    0.32
  14  -4 -20   -0.16    0.29
  14   4 -20   -0.35    0.27
  14  -4 -22    0.68    0.42
  14   4 -22    0.09    0.34
  14  -4 -24    1.30    0.51
  14   4 -24    0.92    0.45
  14  -4 -26    0.20    0.40
  14   4 -26    0.03    0.38
  14  -4 -28    0.54    0.48
  14   5  19    0.18    0.43
  14   5  17    1.22    0.50
  14   5  17    2.08    0.64
  14  -5  15    3.17    0.65
  14   5  15    2.50    0.67
  14   5  15    2.50    0.60
  14  -5  13    3.15    0.61
  14   5  13    2.67    0.58
  14   5  13    2.93    0.68
  14  -5  11    7.02    0.85
  14   5  11    5.49    0.89
  14   5  11    7.21    0.83
  14  -5   9    4.61    0.69
  14   5   9    3.32    0.61
  14   5   9    5.14    0.83
  14  -5   7    2.53    0.52
  14   5   7    1.56    0.45
  14  -5   5    4.64    0.69
  14   5   5    4.93    0.65
  14  -5   3    1.98    0.46
  14   5   3    1.70    0.43
  14  -5   1    1.25    0.42
  14   5   1    1.18    0.40
  14  -5  -1    2.70    0.52
  14  -5  -3    0.14    0.29
  14   5  -3    0.06    0.29
  14  -5  -5    0.21    0.28
  14   5  -5    0.01    0.27
  14  -5  -7    0.81    0.34
  14   5  -7    0.46    0.34
  14  -5  -9    4.62    0.66
  14   5  -9    3.10    0.54
  14   5  -9    3.11    0.54
  14  -5 -11    1.57    0.45
  14   5 -11    1.78    0.46
  14  -5 -13    0.73    0.39
  14   5 -13    2.09    0.50
  14  -5 -15    6.09    0.79
  14   5 -15    4.90    0.73
  14  -5 -17    1.22    0.44
  14   5 -17    0.87    0.41
  14  -5 -19    0.06    0.33
  14   5 -19    0.59    0.40
  14  -5 -21    0.41    0.38
  14   5 -21    0.44    0.39
  14  -5 -23    0.96    0.46
  14   5 -23    0.93    0.49
  14  -5 -25    0.56    0.43
  14   6  16    0.61    0.55
  14  -6  14    0.66    0.47
  14   6  14    0.43    0.48
  14  -6  12    0.23    0.37
  14   6  12    0.44    0.48
  14  -6  10    0.08    0.36
  14   6  10    0.40    0.43
  14  -6   8    1.65    0.49
  14   6   8    1.40    0.55
  14  -6   6    1.45    0.50
  14   6   6    0.97    0.47
  14  -6   4    0.31    0.35
  14   6   4    0.48    0.42
  14  -6   2    3.39    0.62
  14   6   2    2.36    0.58
  14  -6   0    1.99    0.51
  14   6   0    3.07    0.63
  14  -6  -2    3.59    0.64
  14   6  -2    3.35    0.66
  14  -6  -4    4.69    0.73
  14   6  -4    5.29    0.79
  14  -6  -6    6.51    0.84
  14   6  -6    7.06    0.92
  14  -6  -8    2.06    0.51
  14  -6 -10    2.35    0.54
  14  -6 -12    0.45    0.38
 -14  -6  12    0.94    0.48
  14   6 -12    1.12    0.44
  14  -6 -14   -0.04    0.35
 -14  -6  14    0.41    0.40
  14   6 -14    0.61    0.41
  14  -6 -16    1.79    0.53
  14   6 -16    0.99    0.43
  14  -6 -18    0.42    0.38
  14   6 -18    0.38    0.41
  14  -6 -20    0.11    0.40
  14   6 -20    0.22    0.41
  14   7   9    3.49    0.83
  14   7   7    1.69    0.66
  14   7   5    2.60    0.70
  14  -7   3   -0.01    0.38
  14   7   3   -0.07    0.42
  14  -7   1    1.81    0.53
  14   7   1    0.43    0.48
  14  -7  -1    0.41    0.38
  14   7  -1    0.53    0.46
  14  -7  -3    0.66    0.41
  14   7  -3    0.07    0.41
  14  -7  -5    0.19    0.37
  14  -7  -7    0.05    0.36
  14  -7  -9    0.23    0.38
 -14  -7  15    0.62    0.54
  15   0  25    0.40    0.51
  15   0  23   -0.34    0.37
  15   0  21   -0.14    0.34
  15   0  19    1.89    0.55
  15   0  17    0.23    0.33
  15   0  15   -0.11    0.28
  15   0  13    2.28    0.50
  15   0  11    0.19    0.31
  15   0   9    1.16    0.35
  15   0   7    0.18    0.24
  15   0   5    7.66    0.77
  15   0   3    2.14    0.41
  15   0   3    2.44    0.37
  15   0   1    6.94    0.57
  15   0   1    6.54    0.69
  15   0  -1   11.33    0.78
  15   0  -1   11.50    0.83
  15   0  -3    1.86    0.39
  15   0  -3    2.42    0.38
  15   0  -5    2.58    0.45
  15   0  -5    2.87    0.42
  15   0  -7   14.28    0.94
  15   0  -9    2.92    0.46
  15   0 -11    7.95    0.77
  15   0 -13    4.11    0.56
  15   0 -15    3.23    0.53
  15   0 -17    0.24    0.30
  15   0 -19    0.91    0.39
  15   0 -21    0.33    0.30
  15   0 -23    0.13    0.30
  15   0 -25    0.65    0.38
  15   0 -27    1.51    0.47
  15   0 -29    3.23    0.68
  15   0 -31    8.72    1.07
  15  -1  26    0.67    0.51
  15   1  26   -0.05    0.47
  15  -1  24   -0.27    0.44
  15   1  24    0.22    0.50
  15  -1  22    0.72    0.50
  15   1  22   -0.02    0.40
  15  -1  20    0.84    0.45
  15   1  20    1.18    0.50
  15  -1  18    0.29    0.40
  15   1  18   -0.16    0.31
  15  -1  16    2.55    0.55
  15   1  16    2.03    0.50
  15  -1  14    2.45    0.50
  15   1  14    1.38    0.46
  15  -1  12    1.25    0.40
  15   1  12    0.20    0.30
  15  -1  10    1.80    0.43
  15   1  10    3.45    0.53
  15  -1   8    2.67    0.46
  15   1   8    2.52    0.46
  15  -1   6    1.77    0.38
  15  -1   6    2.15    0.36
  15  -1   4    3.83    0.54
  15  -1   4    4.06    0.49
  15   1   4    5.55    0.64
  15  -1   2    5.19    0.59
  15  -1   2    5.70    0.58
  15   1   2    5.18    0.62
  15  -1   0    7.54    0.72
  15  -1   0    7.76    0.63
  15   1   0    7.30    0.74
  15   1   0    6.75    0.57
  15  -1  -2   12.94    0.88
  15  -1  -2   11.97    0.84
  15   1  -2   12.29    0.90
  15   1  -2   12.25    0.80
  15  -1  -4    3.93    0.49
  15  -1  -4    3.75    0.49
  15   1  -4    3.67    0.52
  15   1  -4    3.90    0.48
  15  -1  -6    9.05    0.71
  15  -1  -6    8.05    0.67
  15   1  -6    7.53    0.76
  15   1  -6    7.98    0.66
  15  -1  -8    2.08    0.41
  15   1  -8    2.00    0.39
  15  -1 -10    6.96    0.75
  15   1 -10    9.50    0.74
  15  -1 -12   12.13    0.93
  15   1 -12   14.60    0.98
  15  -1 -14   10.39    0.85
  15   1 -14    9.71    0.82
  15  -1 -16   13.93    1.04
  15   1 -16   14.06    1.03
  15  -1 -18   11.18    1.06
  15   1 -18   11.77    0.95
  15  -1 -20   11.53    0.98
  15   1 -20   12.48    1.15
  15  -1 -22   13.03    1.09
  15   1 -22   13.61    1.09
  15  -1 -24    9.27    1.01
  15   1 -24    9.19    1.00
  15  -1 -26    8.14    0.98
  15   1 -26    8.28    0.99
  15  -1 -28    2.59    0.62
  15   1 -28    2.51    0.63
  15  -1 -30    3.68    0.74
  15   1 -30    2.96    0.67
  15  -2  25   -0.12    0.43
  15   2  25    0.37    0.51
  15  -2  23    0.14    0.42
  15   2  23   -0.03    0.40
  15  -2  21   -0.12    0.40
  15   2  21   -0.11    0.37
  15  -2  19    0.07    0.36
  15   2  19    0.25    0.40
  15  -2  17    0.22    0.35
  15   2  17    0.05    0.34
  15  -2  15    2.19    0.50
  15   2  15    3.16    0.59
  15  -2  13   -0.10    0.24
  15   2  13    0.00    0.30
  15  -2  11    4.76    0.64
  15   2  11    4.93    0.68
  15  -2   9    1.66    0.37
  15  -2   9    1.18    0.34
  15   2   9    1.23    0.38
  15  -2   7    1.33    0.34
  15  -2   7    1.66    0.37
  15   2   7    1.30    0.39
  15  -2   5    0.63    0.30
  15  -2   5    0.86    0.31
  15   2   5    0.55    0.31
  15  -2   3    4.90    0.58
  15  -2   3    5.61    0.61
  15   2   3    5.84    0.67
  15  -2   1   11.54    0.82
  15  -2   1   12.29    0.84
  15   2   1   10.13    0.84
  15  -2  -1   12.03    0.84
  15  -2  -1   12.44    0.87
  15   2  -1   11.29    0.76
  15   2  -1   12.57    0.92
  15  -2  -3    7.16    0.62
  15  -2  -3    7.50    0.75
  15   2  -3    6.33    0.71
  15   2  -3    7.80    0.61
  15  -2  -5   26.77    1.50
  15  -2  -5   26.68    1.56
  15   2  -5   27.27    1.60
  15   2  -5   30.73    1.52
  15  -2  -7    5.52    0.60
  15  -2  -7    5.32    0.66
  15   2  -7    6.59    0.65
  15  -2  -9    0.16    0.23
  15   2  -9    0.70    0.30
  15  -2 -11    3.99    0.58
  15   2 -11    6.38    0.69
  15  -2 -13    2.10    0.45
  15   2 -13    1.41    0.38
  15  -2 -15    3.91    0.59
  15   2 -15    2.80    0.52
  15  -2 -17    2.08    0.48
  15   2 -17    2.10    0.47
  15  -2 -19    1.78    0.46
  15   2 -19    1.94    0.49
  15  -2 -21    0.27    0.33
  15   2 -21   -0.73    0.23
  15  -2 -23    1.06    0.43
  15   2 -23    0.91    0.42
  15  -2 -25    1.76    0.51
  15   2 -25    0.99    0.45
  15  -2 -27    1.69    0.55
  15   2 -27    4.90    0.79
  15  -2 -29    0.11    0.42
  15   2 -29    1.27    0.51
  15  -3  22    0.09    0.43
  15   3  22   -0.23    0.42
  15  -3  20   -0.29    0.38
  15   3  20    0.39    0.41
  15  -3  18   -0.27    0.33
  15   3  18   -0.03    0.39
  15  -3  16    1.18    0.47
  15   3  16    2.85    0.61
  15  -3  14    0.57    0.38
  15   3  14    0.52    0.39
  15  -3  12    2.43    0.50
  15   3  12    1.88    0.48
  15  -3  10    0.25    0.28
  15  -3  10    0.70    0.33
  15   3  10    0.40    0.33
  15  -3   8    3.69    0.55
  15  -3   8    4.93    0.62
  15   3   8    4.66    0.66
  15  -3   6    4.94    0.62
  15  -3   6    4.39    0.57
  15   3   6    5.13    0.66
  15  -3   4    2.17    0.44
  15  -3   4    1.51    0.36
  15   3   4    2.09    0.43
  15  -3   2    1.78    0.35
  15  -3   2    1.95    0.42
  15   3   2    1.42    0.41
  15  -3   0    3.03    0.44
  15  -3   0    3.40    0.51
  15   3   0    3.48    0.54
  15  -3  -2    0.87    0.33
  15  -3  -2    0.98    0.30
  15   3  -2    0.71    0.30
  15  -3  -4   -0.18    0.22
  15  -3  -4    0.21    0.22
  15   3  -4    0.20    0.24
  15   3  -4    0.44    0.27
  15  -3  -6    2.39    0.45
  15  -3  -6    2.43    0.40
  15   3  -6    1.28    0.37
  15   3  -6    2.89    0.45
  15  -3  -8    1.51    0.39
  15  -3  -8    1.12    0.32
  15   3  -8    2.26    0.44
  15  -3 -10    1.16    0.39
  15   3 -10    2.50    0.45
  15  -3 -12    3.20    0.55
  15   3 -12    3.50    0.54
  15  -3 -14    8.80    0.92
  15   3 -14    8.15    0.85
  15  -3 -16   13.22    1.04
  15   3 -16   12.82    1.01
  15  -3 -18   13.54    1.09
  15   3 -18   14.83    1.11
  15  -3 -20   11.97    1.16
  15   3 -20   11.76    1.13
  15  -3 -22    7.78    0.94
  15   3 -22    8.44    0.97
  15  -3 -24    5.07    0.77
  15   3 -24    6.35    0.86
  15  -3 -26    7.17    0.93
  15   3 -26    4.53    0.78
  15  -3 -28    4.65    0.79
  15   4  21   -0.22    0.35
  15   4  21   -0.25    0.43
  15   4  19    1.40    0.54
  15   4  19    1.26    0.57
  15   4  17    0.18    0.35
  15   4  15    1.18    0.44
  15  -4  13   -0.11    0.31
  15   4  13    0.07    0.35
  15  -4  11    1.15    0.39
  15   4  11    1.30    0.44
  15  -4   9    0.82    0.37
  15   4   9    0.40    0.33
  15  -4   7    1.69    0.43
  15   4   7    1.01    0.37
  15  -4   5    0.59    0.32
  15   4   5    0.67    0.36
  15  -4   3    2.69    0.50
  15   4   3    2.98    0.53
  15  -4   1    1.58    0.40
  15   4   1    1.18    0.41
  15  -4  -1    2.88    0.52
  15   4  -1    3.52    0.55
  15  -4  -3    7.14    0.80
  15   4  -3    6.67    0.75
  15  -4  -5    5.81    0.71
  15   4  -5    5.19    0.65
  15  -4  -7    7.26    0.81
  15   4  -7    7.43    0.76
  15   4  -7    7.25    0.78
  15  -4  -9    5.11    0.68
  15   4  -9    4.70    0.62
  15  -4 -11    5.33    0.72
  15   4 -11    5.73    0.72
  15  -4 -13    5.93    0.77
  15   4 -13    5.62    0.73
  15  -4 -15    3.57    0.61
  15   4 -15    3.73    0.63
  15  -4 -17    0.79    0.41
  15   4 -17    0.96    0.41
  15  -4 -19    0.15    0.32
  15   4 -19   -0.36    0.27
  15  -4 -21   -0.12    0.33
  15   4 -21   -0.18    0.31
  15  -4 -23    0.02    0.38
  15   4 -23    2.34    0.62
  15  -4 -25    2.35    0.62
  15   4 -25    1.82    0.57
  15  -4 -27    0.92    0.52
  15   5  18    0.30    0.48
  15   5  18    0.32    0.46
  15   5  16    1.36    0.56
  15   5  16    1.02    0.49
  15  -5  14    0.24    0.40
  15   5  14    0.50    0.44
  15   5  14    0.24    0.43
  15  -5  12    1.03    0.45
  15   5  12    0.04    0.39
  15   5  12    0.08    0.39
  15  -5  10    1.24    0.46
  15   5  10    1.92    0.52
  15   5  10    1.40    0.53
  15  -5   8    0.75    0.39
  15   5   8    1.39    0.43
  15  -5   6    0.19    0.32
  15   5   6   -0.09    0.30
  15  -5   4    2.46    0.52
  15   5   4    2.17    0.49
  15  -5   2    0.42    0.33
  15   5   2    0.34    0.33
  15  -5   0    1.92    0.50
  15   5   0    2.18    0.48
  15  -5  -2    0.63    0.35
  15   5  -2    1.21    0.39
  15  -5  -4   -0.18    0.25
  15   5  -4    0.00    0.29
  15  -5  -6    1.54    0.44
  15   5  -6    1.12    0.39
  15  -5  -8    0.75    0.39
  15   5  -8    1.84    0.46
  15  -5 -10    1.87    0.49
  15   5 -10    1.08    0.44
  15   5 -10    1.29    0.42
  15  -5 -12    4.06    0.69
  15   5 -12    5.41    0.71
  15  -5 -14    2.53    0.57
  15   5 -14    3.39    0.61
  15  -5 -16    3.04    0.63
  15   5 -16    2.97    0.59
  15  -5 -18    1.07    0.47
  15   5 -18    1.01    0.46
  15  -5 -20    6.90    0.90
  15   5 -20    7.56    0.93
  15  -5 -22    3.02    0.66
  15   5 -22    3.67    0.69
  15  -5 -24    2.90    0.66
  15  -6  13    0.61    0.45
  15   6  13   -0.16    0.40
  15  -6  11   -0.07    0.37
  15   6  11    0.04    0.45
  15  -6   9   -0.62    0.32
  15   6   9    0.48    0.43
  15  -6   7    0.46    0.39
  15   6   7    1.70    0.58
  15  -6   5    0.45    0.38
  15   6   5    0.24    0.40
  15  -6   3    0.30    0.37
  15   6   3    1.20    0.50
  15  -6   1    1.02    0.43
  15   6   1    1.20    0.53
  15  -6  -1    3.35    0.63
  15   6  -1    2.38    0.62
  15  -6  -3    1.20    0.45
  15   6  -3    1.18    0.47
  15  -6  -5    2.51    0.58
  15   6  -5    2.17    0.57
  15  -6  -7    3.27    0.63
  15  -6  -9    3.45    0.66
  15  -6 -11    4.78    0.76
  15  -6 -13    0.29    0.37
  15   6 -13    0.24    0.37
  15  -6 -15    0.55    0.40
  15   6 -15    0.35    0.39
  15  -6 -17    1.09    0.48
  15   6 -17    1.53    0.51
  15   6 -19    0.19    0.42
  15   7   6    0.64    0.52
  15   7   4    0.41    0.50
  15   7   2    0.43    0.47
  15   7   0   -0.08    0.42
  15   7  -2    0.07    0.40
  16   0  24    2.19    0.66
  16   0  22    3.21    0.71
  16   0  20    1.68    0.54
  16   0  18    3.83    0.70
  16   0  16    3.70    0.64
  16   0  14    0.99    0.40
  16   0  12   -0.15    0.28
  16   0  10    0.38    0.32
  16   0   8    1.00    0.36
  16   0   6    3.02    0.51
  16   0   4    6.53    0.71
  16   0   2    9.67    0.70
  16   0   2    9.98    0.82
  16   0   0    4.63    0.58
  16   0   0    4.30    0.52
  16   0  -2   13.23    0.93
  16   0  -2   12.20    0.85
  16   0  -4   26.69    1.50
  16   0  -4   30.03    1.61
  16   0  -6    0.77    0.31
  16   0  -6    0.81    0.31
  16   0  -8   37.75    1.96
  16   0 -10    7.93    0.79
  16   0 -12    9.49    0.79
  16   0 -14    0.73    0.34
  16   0 -16    2.10    0.46
  16   0 -18    0.38    0.32
  16   0 -20    0.52    0.35
  16   0 -22   -0.09    0.27
  16   0 -24    3.41    0.63
  16   0 -26   -0.18    0.35
  16   0 -28    6.60    0.92
  16  -1  23    0.45    0.48
  16   1  23    0.06    0.43
  16  -1  21    0.95    0.49
  16   1  21    0.85    0.50
  16  -1  19    3.20    0.66
  16   1  19    3.32    0.70
  16  -1  17    4.26    0.71
  16   1  17    3.08    0.61
  16  -1  15    2.39    0.53
  16   1  15    2.75    0.57
  16  -1  13    9.16    0.95
  16   1  13    8.38    0.92
  16  -1  11   12.63    0.97
  16   1  11   10.43    0.92
  16  -1   9   17.67    1.19
  16   1   9   17.50    1.21
  16  -1   7    8.64    0.84
  16   1   7    8.26    0.85
  16  -1   5    7.22    0.61
  16  -1   5    7.06    0.73
  16   1   5    6.65    0.75
  16  -1   3    8.41    0.74
  16  -1   3    9.54    0.72
  16   1   3    9.52    0.81
  16  -1   1   13.93    1.01
  16  -1   1   16.25    1.00
  16   1   1   16.45    1.08
  16  -1  -1    2.26    0.40
  16  -1  -1    2.26    0.41
  16   1  -1    3.32    0.43
  16   1  -1    2.45    0.47
  16  -1  -3    7.74    0.75
  16  -1  -3    7.06    0.71
  16   1  -3    8.11    0.65
  16   1  -3    8.14    0.80
  16  -1  -5    5.30    0.59
  16  -1  -5    4.47    0.57
  16   1  -5    4.60    0.60
  16   1  -5    3.69    0.49
  16  -1  -7   16.14    1.07
  16  -1  -7   14.94    1.05
  16   1  -7   16.65    1.04
  16   1  -7   17.61    1.14
  16  -1  -9    6.44    0.70
  16   1  -9    6.38    0.67
  16  -1 -11    4.66    0.62
  16   1 -11    5.06    0.62
  16  -1 -13    1.63    0.42
  16   1 -13    2.26    0.44
  16  -1 -15   11.46    0.92
  16  -1 -17    6.18    0.76
  16   1 -17    5.57    0.72
  16  -1 -19    4.32    0.67
  16   1 -19    5.39    0.72
  16  -1 -21    3.58    0.64
  16   1 -21    4.83    0.70
  16  -1 -23    7.04    0.88
  16   1 -23    6.23    0.85
  16  -1 -25    6.73    0.89
  16   1 -25    8.08    0.96
  16  -1 -27    0.21    0.38
  16   1 -27    0.37    0.41
  16  -1 -29    5.25    0.86
  16   1 -29    4.67    0.80
  16  -2  24    1.53    0.59
  16   2  24    2.34    0.71
  16  -2  22    0.79    0.51
  16   2  22    0.96    0.55
  16  -2  20    1.07    0.51
  16   2  20    1.15    0.55
  16  -2  18    2.73    0.60
  16   2  18    1.86    0.55
  16  -2  16    3.59    0.65
  16   2  16    3.01    0.60
  16  -2  14    0.79    0.39
  16   2  14    0.25    0.36
  16  -2  12    1.51    0.45
  16   2  12    3.27    0.62
  16  -2  10    2.77    0.51
  16   2  10    1.89    0.48
  16  -2   8    0.23    0.25
  16  -2   8    0.49    0.30
  16   2   8    0.55    0.35
  16  -2   6    6.70    0.68
  16  -2   6    6.70    0.71
  16   2   6    7.25    0.79
  16  -2   4    5.43    0.64
  16  -2   4    6.31    0.65
  16   2   4    6.01    0.70
  16  -2   2   14.35    0.97
  16  -2   2   13.23    0.96
  16   2   2   15.93    1.08
  16  -2   0   19.69    1.23
  16  -2   0   20.20    1.25
  16   2   0   22.51    1.34
  16  -2  -2   11.76    0.90
  16  -2  -2   12.85    0.91
  16   2  -2   14.71    0.88
  16   2  -2   13.92    1.00
  16  -2  -4   23.96    1.35
  16  -2  -4   23.11    1.36
  16   2  -4   22.68    1.40
  16   2  -4   21.78    1.27
  16  -2  -6    8.38    0.68
  16  -2  -6    9.90    0.78
  16   2  -6    6.32    0.67
  16   2  -6    6.33    0.76
  16  -2  -8    6.36    0.67
  16  -2  -8    5.29    0.67
  16   2  -8    7.74    0.72
  16  -2 -10    6.53    0.75
  16   2 -10    6.88    0.72
  16  -2 -12   10.12    0.83
  16   2 -12    7.64    0.81
  16  -2 -14    3.18    0.57
  16   2 -14    2.21    0.48
  16  -2 -16    2.10    0.47
  16   2 -16    1.60    0.44
  16  -2 -18    3.70    0.62
  16   2 -18    3.90    0.63
  16  -2 -20   -0.41    0.26
  16   2 -20   -0.08    0.29
  16  -2 -22    1.00    0.45
  16   2 -22    1.03    0.42
  16  -2 -24    0.53    0.44
  16   2 -24    0.41    0.39
  16  -2 -26   -0.09    0.32
  16   2 -26   -0.13    0.35
  16  -2 -28    0.78    0.50
  16   2 -28    0.97    0.49
  16  -3  21    0.97    0.51
  16   3  21    0.95    0.54
  16  -3  19    1.76    0.56
  16   3  19    2.11    0.62
  16  -3  17    4.52    0.74
  16   3  17    4.06    0.76
  16  -3  15    4.94    0.74
  16   3  15    4.40    0.76
  16  -3  13    8.49    0.92
  16   3  13   10.11    1.05
  16  -3  11    4.24    0.62
  16   3  11    4.77    0.70
  16  -3   9    5.97    0.69
  16  -3   9    6.41    0.73
  16   3   9    4.96    0.71
  16  -3   7    8.89    0.78
  16  -3   7    9.47    0.79
  16   3   7    9.49    0.93
  16  -3   5   10.98    0.84
  16  -3   5   10.67    0.86
  16   3   5   12.07    0.95
  16  -3   3    6.72    0.73
  16  -3   3    7.91    0.75
  16   3   3    7.60    0.81
  16  -3   1    2.60    0.48
  16  -3   1    3.24    0.47
  16   3   1    3.13    0.54
  16  -3  -1    4.24    0.53
  16  -3  -1    4.29    0.59
  16   3  -1    5.89    0.70
  16  -3  -3    0.61    0.29
  16  -3  -3    0.20    0.27
  16   3  -3    0.47    0.31
  16  -3  -5    0.67    0.32
  16  -3  -5    0.83    0.30
  16   3  -5    0.55    0.29
  16   3  -5    0.53    0.32
  16  -3  -7    0.60    0.30
  16   3  -7    0.37    0.32
  16   3  -7    0.33    0.28
  16  -3  -9   -0.07    0.24
  16   3  -9   -0.12    0.23
  16  -3 -11    3.05    0.53
  16   3 -11    2.25    0.46
  16  -3 -13    1.98    0.47
  16   3 -13    2.53    0.50
  16  -3 -15    7.51    0.86
  16  -3 -17   10.02    1.03
  16   3 -17    9.82    1.01
  16  -3 -19    6.89    0.86
  16   3 -19    6.78    0.85
  16  -3 -21    3.63    0.68
  16   3 -21    5.13    0.78
  16  -3 -23    4.63    0.76
  16   3 -23    6.69    0.89
  16  -3 -25    2.08    0.57
  16   3 -25    2.60    0.65
  16  -3 -27    1.91    0.62
  16   4  20    1.99    0.60
  16   4  20    1.52    0.58
  16   4  18    1.33    0.56
  16   4  16    0.58    0.41
  16   4  14    0.46    0.43
  16  -4  12    0.06    0.32
  16   4  12    0.35    0.37
  16  -4  10    0.09    0.33
  16   4  10    0.64    0.39
  16  -4   8    1.14    0.39
  16   4   8    1.95    0.50
  16  -4   6    1.52    0.44
  16   4   6    2.09    0.48
  16  -4   4    2.73    0.52
  16   4   4    2.89    0.53
  16  -4   2    4.63    0.66
  16   4   2    3.74    0.59
  16  -4   0    6.17    0.75
  16   4   0    7.17    0.81
  16  -4  -2    8.01    0.84
  16   4  -2    7.62    0.83
  16  -4  -4    9.80    0.96
  16   4  -4    9.51    0.94
  16  -4  -6    5.70    0.73
  16   4  -6    5.78    0.71
  16  -4  -8   11.06    0.96
  16   4  -8   12.30    0.91
  16   4  -8   12.25    0.96
  16  -4 -10    4.76    0.68
  16   4 -10    3.82    0.59
  16  -4 -12    4.57    0.68
  16   4 -12    4.66    0.65
  16  -4 -14    4.32    0.68
  16   4 -14    3.74    0.61
  16  -4 -16    0.56    0.37
  16   4 -16    0.85    0.39
  16  -4 -18    1.12    0.46
  16   4 -18    1.28    0.45
  16  -4 -20    0.38    0.42
  16   4 -20    0.02    0.36
  16  -4 -22    0.35    0.41
  16   4 -22    1.24    0.50
  16  -4 -24    0.61    0.44
  16   4 -24    0.23    0.40
  16   5  17    0.98    0.54
  16   5  17    0.79    0.52
  16   5  15    1.34    0.55
  16   5  15    2.78    0.72
  16  -5  13    2.44    0.59
  16   5  13    2.19    0.68
  16   5  13    3.23    0.66
  16  -5  11    3.25    0.64
  16   5  11    2.33    0.62
  16   5  11    2.55    0.61
  16  -5   9    4.12    0.68
  16   5   9    4.85    0.72
  16  -5   7    4.58    0.70
  16   5   7    3.46    0.62
  16  -5   5    1.74    0.48
  16   5   5    1.80    0.48
  16  -5   3    2.21    0.52
  16   5   3    4.39    0.66
  16  -5   1    3.12    0.58
  16   5   1    4.20    0.64
  16  -5  -1    2.13    0.51
  16   5  -1    2.69    0.54
  16  -5  -3    1.21    0.42
  16   5  -3    1.99    0.48
  16  -5  -5    0.00    0.29
  16   5  -5    0.09    0.33
  16  -5  -7    0.97    0.41
  16   5  -7    0.43    0.35
  16  -5  -9    0.16    0.31
  16   5  -9    0.16    0.31
  16  -5 -11    3.72    0.66
  16   5 -11    4.17    0.66
  16   5 -11    4.72    0.68
  16  -5 -13    4.28    0.71
  16   5 -13    5.01    0.73
  16  -5 -15    0.26    0.39
  16   5 -15    1.18    0.46
  16  -5 -17    0.88    0.43
  16   5 -17    1.80    0.52
  16  -5 -19    5.24    0.82
  16   5 -19    3.81    0.71
  16  -5 -21    0.87    0.47
  16   5 -21    0.22    0.43
  16   6  12   -0.04    0.44
  16  -6  10    0.34    0.41
  16   6  10    0.33    0.51
  16  -6   8    0.78    0.46
  16   6   8    0.26    0.42
  16  -6   6    0.38    0.39
  16   6   6    0.96    0.51
  16  -6   4    2.78    0.63
  16   6   4    2.74    0.69
  16  -6   2    2.99    0.64
  16   6   2    2.40    0.66
  16  -6   0    3.19    0.65
  16   6   0    1.83    0.56
  16  -6  -2    2.00    0.55
  16   6  -2    3.31    0.66
  16  -6  -4    3.86    0.69
  16   6  -4    3.49    0.72
  16  -6  -6    2.95    0.61
  16   6  -6    2.53    0.61
  16  -6  -8    4.73    0.76
  16  -6 -10    2.60    0.58
  16  -6 -12    1.37    0.52
  16  -6 -14    1.77    0.54
  16   6 -14    2.14    0.54
  16   6 -16    0.22    0.38
  16   6 -18    0.32    0.39
  16   7   3    0.33    0.47
  16   7   1    1.30    0.56
  16   7  -1    0.92    0.53
  16   7  -3    0.32    0.46
  17   0  23   -0.17    0.47
  17   0  21    0.03    0.46
  17   0  19    1.07    0.52
  17   0  17    1.53    0.50
  17   0  15   -0.20    0.33
  17   0  13    0.10    0.34
  17   0  11   -0.07    0.31
  17   0   9    0.15    0.28
  17   0   7    0.18    0.29
  17   0   5    6.10    0.72
  17   0   3    0.66    0.31
  17   0   1   -0.01    0.23
  17   0   1    0.11    0.22
  17   0  -1    0.57    0.28
  17   0  -1    1.04    0.33
  17   0  -3    2.08    0.44
  17   0  -3    1.70    0.36
  17   0  -5    5.02    0.58
  17   0  -5    4.03    0.57
  17   0  -7    4.06    0.58
  17   0  -7    3.08    0.49
  17   0  -9    2.33    0.45
  17   0 -11   -0.02    0.24
  17   0 -13    2.74    0.50
  17   0 -15    1.09    0.38
  17   0 -17    0.81    0.37
  17   0 -19    0.01    0.29
  17   0 -21    0.37    0.37
  17   0 -23    0.01    0.31
  17   0 -25    1.11    0.48
  17   0 -27    0.34    0.41
  17  -1  22    0.58    0.51
  17   1  22    0.05    0.48
  17  -1  20    0.44    0.46
  17   1  20    0.22    0.44
  17  -1  18    0.38    0.43
  17   1  18    0.14    0.36
  17  -1  16    0.59    0.41
  17   1  16    0.26    0.40
  17  -1  14   -0.14    0.29
  17   1  14   -0.21    0.31
  17  -1  12    0.58    0.37
  17   1  12    0.33    0.34
  17  -1  10    0.51    0.33
  17   1  10   -0.04    0.32
  17  -1   8    0.67    0.32
  17   1   8    0.56    0.35
  17  -1   6    2.05    0.45
  17   1   6    1.46    0.43
  17  -1   4    3.31    0.46
  17  -1   4    2.25    0.45
  17   1   4    2.03    0.45
  17  -1   2    2.51    0.45
  17  -1   2    2.46    0.43
  17   1   2    1.62    0.41
  17  -1   0    1.09    0.32
  17  -1   0    0.79    0.33
  17   1   0    0.97    0.34
  17  -1  -2   -0.04    0.23
  17  -1  -2    0.00    0.22
  17   1  -2   -0.31    0.22
  17   1  -2   -0.26    0.19
  17  -1  -4    0.12    0.24
  17  -1  -4    0.06    0.23
  17   1  -4    0.01    0.25
  17   1  -4   -0.09    0.22
  17  -1  -6    0.64    0.32
  17  -1  -6    1.50    0.38
  17   1  -6    0.24    0.28
  17   1  -6    0.88    0.33
  17  -1  -8    0.18    0.25
  17  -1  -8    0.40    0.27
  17   1  -8    0.41    0.32
  17   1  -8    0.33    0.28
  17  -1 -10    0.38    0.29
  17   1 -10    0.52    0.31
  17  -1 -12    4.46    0.62
  17   1 -12    4.05    0.59
  17  -1 -14    1.78    0.43
  17   1 -14    2.32    0.48
  17  -1 -16    0.76    0.37
  17   1 -16    1.08    0.38
  17  -1 -18    4.87    0.71
  17   1 -18    6.30    0.77
  17  -1 -20    9.88    1.02
  17   1 -20    9.36    1.00
  17  -1 -22    4.80    0.73
  17   1 -22    4.42    0.71
  17  -1 -24    5.94    0.84
  17   1 -24    5.83    0.83
  17  -1 -26    5.18    0.81
  17   1 -26    5.00    0.80
  17  -1 -28    1.64    0.56
  17   1 -28    1.18    0.51
  17  -2  21    0.49    0.49
  17   2  21   -0.25    0.40
  17  -2  19   -0.23    0.35
  17   2  19   -0.06    0.37
  17  -2  17    0.09    0.34
  17   2  17    0.64    0.44
  17  -2  15    0.42    0.39
  17   2  15    0.29    0.40
  17  -2  13    0.25    0.34
  17   2  13    0.84    0.42
  17  -2  11    0.05    0.31
  17   2  11   -0.10    0.29
  17  -2   9    4.12    0.61
  17   2   9    3.64    0.63
  17  -2   7    0.12    0.27
  17   2   7    0.19    0.30
  17  -2   5    2.05    0.43
  17  -2   5    3.31    0.49
  17   2   5    2.38    0.49
  17  -2   3    3.12    0.50
  17  -2   3    2.73    0.47
  17   2   3    3.76    0.58
  17  -2   1    1.42    0.37
  17  -2   1    1.73    0.41
  17   2   1    1.91    0.45
  17  -2  -1    0.35    0.28
  17  -2  -1    0.51    0.29
  17   2  -1    0.27    0.32
  17  -2  -3    1.90    0.40
  17  -2  -3    1.81    0.39
  17   2  -3    2.02    0.46
  17  -2  -5    0.96    0.33
  17  -2  -5    1.04    0.33
  17   2  -5    1.94    0.40
  17   2  -5    2.07    0.45
  17  -2  -7    1.20    0.37
  17  -2  -7    0.95    0.32
  17   2  -7    1.29    0.35
  17   2  -7    1.11    0.37
  17  -2  -9    2.38    0.45
  17  -2  -9    2.39    0.48
  17   2  -9    2.96    0.50
  17  -2 -11    3.25    0.54
  17   2 -11    3.10    0.51
  17  -2 -13    2.43    0.50
  17   2 -13    2.42    0.49
  17  -2 -15    0.75    0.36
  17   2 -15    0.35    0.31
  17  -2 -17    0.27    0.32
  17   2 -17    0.53    0.38
  17  -2 -19    0.45    0.37
  17   2 -19    0.15    0.34
  17  -2 -21    0.58    0.41
  17   2 -21    0.62    0.39
  17  -2 -23    0.09    0.38
  17   2 -23    0.04    0.38
  17  -2 -25    2.18    0.58
  17   2 -25    1.04    0.50
  17  -2 -27    0.45    0.46
  17   2 -27    1.14    0.51
  17  -3  20    0.40    0.46
  17   3  20    0.20    0.46
  17  -3  18    1.83    0.59
  17   3  18    1.18    0.56
  17  -3  16    0.31    0.40
  17   3  16    0.74    0.44
  17  -3  14   -0.05    0.36
  17   3  14   -0.17    0.35
  17  -3  12    2.52    0.52
  17   3  12    1.93    0.51
  17  -3  10    1.86    0.46
  17   3  10    2.12    0.53
  17  -3   8    2.03    0.47
  17  -3   8    1.57    0.42
  17   3   8    1.11    0.42
  17  -3   6   -0.28    0.22
  17  -3   6    0.25    0.28
  17   3   6    0.16    0.30
  17  -3   4    0.80    0.32
  17  -3   4    0.65    0.33
  17   3   4    1.30    0.40
  17  -3   2    0.53    0.31
  17  -3   2    0.97    0.32
  17   3   2    0.72    0.37
  17  -3   0    0.16    0.25
  17  -3   0    0.41    0.29
  17   3   0    0.08    0.31
  17  -3  -2    0.90    0.34
  17   3  -2    0.25    0.29
  17  -3  -4    1.17    0.39
  17   3  -4    0.86    0.36
  17  -3  -6    0.20    0.26
  17   3  -6    0.31    0.29
  17   3  -6    0.62    0.35
  17  -3  -8    1.18    0.39
  17   3  -8    1.49    0.41
  17   3  -8    1.75    0.46
  17  -3 -10    0.75    0.34
  17   3 -10    0.16    0.29
  17  -3 -12    1.17    0.41
  17   3 -12    0.45    0.35
  17  -3 -14    3.91    0.64
  17   3 -14    3.39    0.58
  17  -3 -16    4.20    0.67
  17   3 -16    3.38    0.60
  17  -3 -18    8.41    0.95
  17   3 -18    7.67    0.90
  17  -3 -20    4.87    0.77
  17   3 -20    4.51    0.73
  17  -3 -22    2.79    0.63
  17   3 -22    2.74    0.60
  17  -3 -24    0.98    0.48
  17   3 -24    0.09    0.38
  17  -3 -26    1.49    0.55
  17   4  17    1.85    0.56
  17   4  15    1.05    0.50
  17   4  13    0.07    0.41
  17   4  11    0.08    0.35
  17  -4   9    0.94    0.39
  17   4   9    0.40    0.38
  17  -4   7    1.43    0.44
  17   4   7    1.60    0.47
  17  -4   5    0.72    0.36
  17   4   5   -0.32    0.28
  17  -4   3    0.06    0.28
  17   4   3   -0.18    0.28
  17  -4   1    0.61    0.34
  17   4   1    0.86    0.39
  17  -4  -1    0.61    0.35
  17   4  -1    0.35    0.33
  17  -4  -3    1.87    0.46
  17   4  -3    2.05    0.50
  17  -4  -5    1.86    0.47
  17   4  -5    2.03    0.46
  17  -4  -7    0.49    0.34
  17   4  -7    0.24    0.35
  17  -4  -9    3.29    0.59
  17   4  -9    2.40    0.54
  17   4  -9    3.27    0.57
  17  -4 -11    1.77    0.48
  17   4 -11    2.59    0.50
  17  -4 -13    0.21    0.34
  17   4 -13    0.29    0.33
  17  -4 -15    0.71    0.41
  17   4 -15    0.53    0.38
  17  -4 -17   -0.11    0.30
  17   4 -17    0.36    0.35
  17  -4 -19    0.16    0.39
  17   4 -19    0.23    0.35
  17  -4 -21   -0.14    0.37
  17   4 -21    0.23    0.38
  17  -4 -23    1.39    0.53
  17   4 -23    0.97    0.52
  17   5  14    0.54    0.52
  17   5  14    0.57    0.49
  17  -5  12   -0.25    0.34
  17   5  12    0.16    0.43
  17   5  12   -0.07    0.38
  17  -5  10    0.20    0.40
  17   5  10    0.32    0.41
  17  -5   8    0.60    0.39
  17   5   8    0.12    0.39
  17  -5   6    0.75    0.41
  17   5   6    0.49    0.42
  17  -5   4    0.73    0.39
  17   5   4    1.03    0.45
  17  -5   2    0.48    0.39
  17   5   2    0.10    0.33
  17  -5   0    0.97    0.43
  17   5   0    2.03    0.50
  17  -5  -2    0.29    0.33
  17   5  -2    0.90    0.41
  17  -5  -4    0.23    0.34
  17   5  -4    0.45    0.38
  17  -5  -6   -0.10    0.28
  17   5  -6    0.12    0.34
  17  -5  -8    0.31    0.33
  17   5  -8    0.33    0.36
  17  -5 -10    0.68    0.40
  17   5 -10    1.79    0.48
  17  -5 -12    0.73    0.40
  17   5 -12   -0.27    0.32
  17   5 -12    0.33    0.35
  17  -5 -14    2.01    0.57
  17   5 -14    2.80    0.59
  17  -5 -16    0.97    0.46
  17   5 -16    0.55    0.39
  17  -5 -18    1.66    0.56
  17   5 -18    2.02    0.56
  17   5 -20    0.76    0.45
  17   6   9    0.13    0.51
  17  -6   7    0.44    0.41
  17   6   7    0.09    0.46
  17  -6   5    0.16    0.36
  17   6   5    0.16    0.43
  17  -6   3    0.26    0.38
  17   6   3    0.61    0.45
  17  -6   1    1.47    0.51
  17   6   1    0.77    0.49
  17  -6  -1   -0.18    0.36
  17   6  -1    0.29    0.41
  17  -6  -3    0.47    0.40
  17   6  -3   -0.06    0.37
  17  -6  -5    0.46    0.38
  17   6  -5    0.29    0.42
  17  -6  -7    0.86    0.45
  17  -6  -9    0.54    0.40
  17  -6 -11    0.39    0.38
  17   6 -17    0.42    0.46
  18   0  22    0.63    0.52
  18   0  20    0.20    0.45
  18   0  18    0.83    0.46
  18   0  16    0.95    0.47
  18   0  14    0.01    0.33
  18   0  12    0.16    0.31
  18   0  10    0.37    0.36
  18   0   8    0.14    0.30
  18   0   6    0.16    0.30
  18   0   4    0.57    0.34
  18   0   2   -0.02    0.26
  18   0   0    6.32    0.77
  18   0   0    8.09    0.67
  18   0  -2   31.94    1.65
  18   0  -2   28.38    1.72
  18   0  -4    6.43    0.69
  18   0  -4    7.72    0.82
  18   0  -6   36.51    2.03
  18   0  -6   37.66    1.96
  18   0  -8   10.21    0.85
  18   0  -8   10.81    0.91
  18   0 -10    9.53    0.81
  18   0 -12    6.14    0.72
  18   0 -14    1.96    0.46
  18   0 -16    1.58    0.44
  18   0 -18    2.13    0.52
  18   0 -20    0.05    0.33
  18   0 -22   -0.01    0.32
  18   0 -24    0.87    0.43
  18   0 -26    0.71    0.48
  18  -1  21    0.34    0.45
  18   1  21    0.50    0.52
  18  -1  19    2.01    0.57
  18   1  19    1.76    0.60
  18  -1  17    1.28    0.48
  18   1  17    0.96    0.47
  18  -1  15    4.03    0.70
  18   1  15    3.16    0.67
  18  -1  13    5.59    0.78
  18   1  13    3.99    0.70
  18  -1  11    7.68    0.89
  18   1  11    7.94    0.92
  18  -1   9    5.99    0.76
  18   1   9    7.52    0.87
  18  -1   7    6.53    0.76
  18   1   7    6.05    0.76
  18  -1   5    6.95    0.80
  18   1   5    8.15    0.87
  18  -1   3    6.76    0.75
  18  -1   3    5.64    0.64
  18   1   3    6.87    0.79
  18  -1   1    0.38    0.30
  18  -1   1    0.14    0.25
  18   1   1    0.60    0.33
  18  -1  -1   -0.04    0.25
  18  -1  -1    0.13    0.27
  18   1  -1    0.23    0.28
  18  -1  -3    1.17    0.37
  18  -1  -3    1.14    0.35
  18   1  -3    1.51    0.43
  18   1  -3    2.00    0.40
  18  -1  -5    0.23    0.27
  18  -1  -5    0.33    0.26
  18   1  -5    0.23    0.30
  18   1  -5   -0.02    0.24
  18  -1  -7    0.42    0.28
  18  -1  -7   -0.15    0.21
  18   1  -7    0.40    0.29
  18   1  -7    0.64    0.32
  18  -1  -9    2.01    0.43
  18  -1  -9    1.48    0.39
  18   1  -9    1.26    0.38
  18   1  -9    1.77    0.45
  18  -1 -11    1.77    0.43
  18   1 -11    1.66    0.41
  18  -1 -13    7.55    0.85
  18   1 -13   10.17    0.94
  18  -1 -15    8.54    0.90
  18   1 -15    6.96    0.82
  18  -1 -17   12.12    1.12
  18   1 -17    9.68    1.00
  18  -1 -19    2.98    0.59
  18   1 -19    2.75    0.56
  18  -1 -21   11.52    1.15
  18   1 -21   10.68    1.09
  18  -1 -23   10.85    1.14
  18   1 -23   11.47    1.17
  18  -1 -25    5.23    0.83
  18   1 -25    4.38    0.77
  18  -1 -27    3.71    0.73
  18   1 -27    5.57    0.85
  18  -2  20    0.53    0.49
  18   2  20    0.40    0.48
  18  -2  18    2.96    0.69
  18   2  18    0.54    0.48
  18  -2  16    0.25    0.41
  18   2  16    1.07    0.47
  18  -2  14    1.67    0.48
  18   2  14    1.07    0.48
  18  -2  12    1.56    0.45
  18   2  12    1.10    0.48
  18  -2  10    0.37    0.35
  18   2  10    0.38    0.36
  18  -2   8    0.12    0.32
  18   2   8   -0.13    0.31
  18  -2   6    1.17    0.40
  18   2   6    1.15    0.43
  18  -2   4    3.80    0.55
  18  -2   4    3.34    0.54
  18   2   4    4.21    0.64
  18  -2   2    4.72    0.63
  18  -2   2    4.93    0.62
  18   2   2    5.20    0.71
  18  -2   0    4.54    0.60
  18  -2   0    4.69    0.62
  18   2   0    5.18    0.71
  18  -2  -2    6.91    0.77
  18  -2  -2    8.31    0.81
  18   2  -2    8.69    0.92
  18  -2  -4    8.57    0.82
  18  -2  -4    6.99    0.78
  18   2  -4    8.23    0.88
  18  -2  -6    9.18    0.90
  18  -2  -6   10.47    0.84
  18   2  -6   11.28    0.92
  18   2  -6   10.05    0.80
  18  -2  -8    5.80    0.70
  18  -2  -8    5.91    0.67
  18   2  -8    5.81    0.76
  18   2  -8    4.52    0.61
  18  -2 -10   15.71    1.11
  18  -2 -10   17.47    1.18
  18   2 -10   15.77    1.09
  18  -2 -12    4.18    0.63
  18   2 -12    4.58    0.65
  18  -2 -14    4.44    0.66
  18   2 -14    4.76    0.66
  18  -2 -16    2.27    0.51
  18   2 -16    2.14    0.51
  18  -2 -18    3.11    0.61
  18   2 -18    3.05    0.59
  18  -2 -20   -0.07    0.32
  18   2 -20    0.15    0.35
  18  -2 -22    0.01    0.36
  18   2 -22   -0.26    0.35
  18  -2 -24    0.79    0.45
  18   2 -24    0.28    0.41
  18  -2 -26    0.69    0.48
  18   2 -26    0.18    0.42
  18  -3  19    1.39    0.58
  18   3  19    0.99    0.56
  18  -3  17    1.43    0.54
  18   3  17    0.50    0.50
  18  -3  15    4.16    0.72
  18   3  15    4.28    0.76
  18  -3  13    3.16    0.62
  18   3  13    3.76    0.69
  18  -3  11    1.71    0.50
  18   3  11    3.56    0.65
  18  -3   9    5.81    0.74
  18   3   9    6.69    0.85
  18  -3   7    3.51    0.58
  18  -3   7    3.21    0.55
  18   3   7    3.04    0.60
  18  -3   5    4.10    0.58
  18  -3   5    4.13    0.62
  18   3   5    3.61    0.63
  18  -3   3    6.87    0.77
  18   3   3    6.72    0.82
  18  -3   1    4.97    0.64
  18   3   1    4.64    0.69
  18  -3  -1    1.43    0.39
  18   3  -1    2.08    0.49
  18  -3  -3    0.59    0.32
  18   3  -3    0.18    0.34
  18  -3  -5    1.79    0.47
  18   3  -5    2.04    0.51
  18  -3  -7    0.50    0.32
  18   3  -7    0.19    0.34
  18  -3  -9    1.03    0.40
  18   3  -9    1.62    0.42
  18   3  -9    1.26    0.45
  18  -3 -11   -0.09    0.29
  18   3 -11    0.22    0.32
  18  -3 -13    3.75    0.63
  18   3 -13    3.90    0.62
  18  -3 -15    3.42    0.63
  18   3 -15    3.30    0.62
  18  -3 -17   16.02    1.26
  18   3 -17   16.94    1.28
  18  -3 -19    7.43    0.93
  18   3 -19    7.70    0.93
  18  -3 -21    5.96    0.85
  18   3 -21    5.67    0.83
  18  -3 -23    6.32    0.91
  18   3 -23    4.89    0.81
  18   4  16    0.28    0.45
  18   4  14    0.17    0.43
  18   4  12    0.27    0.42
  18   4  10    0.05    0.37
  18  -4   8    0.50    0.37
  18   4   8    0.66    0.42
  18  -4   6    0.14    0.30
  18   4   6   -0.30    0.29
  18  -4   4    2.45    0.52
  18   4   4    2.15    0.54
  18  -4   2    0.67    0.37
  18   4   2    0.14    0.35
  18  -4   0    2.43    0.53
  18   4   0    3.53    0.63
  18  -4  -2    8.03    0.89
  18   4  -2    6.40    0.82
  18  -4  -4    9.38    0.95
  18   4  -4    8.25    0.92
  18  -4  -6    9.09    0.98
  18   4  -6    9.20    0.95
  18  -4  -8    5.35    0.74
  18   4  -8    4.34    0.68
  18  -4 -10    6.07    0.81
  18   4 -10    5.05    0.75
  18  -4 -12    2.91    0.59
  18   4 -12    3.39    0.61
  18  -4 -14    4.70    0.72
  18   4 -14    3.93    0.67
  18  -4 -16    0.16    0.37
  18   4 -16   -0.22    0.35
  18  -4 -18    0.65    0.40
  18   4 -18    1.12    0.46
  18  -4 -20   -0.73    0.32
  18   4 -20    0.45    0.42
  18   4 -22   -0.20    0.39
  18   5  13    0.98    0.55
  18   5  13    2.43    0.69
  18  -5  11    1.47    0.50
  18   5  11    3.78    0.73
  18  -5   9    3.80    0.69
  18   5   9    4.30    0.74
  18  -5   7    2.80    0.62
  18   5   7    3.51    0.67
  18  -5   5    1.87    0.53
  18   5   5    2.96    0.61
  18  -5   3    4.74    0.74
  18   5   3    4.31    0.70
  18  -5   1    1.47    0.47
  18   5   1    1.21    0.47
  18  -5  -1    0.34    0.36
  18   5  -1   -0.10    0.36
  18  -5  -3    0.93    0.40
  18   5  -3    0.17    0.36
  18  -5  -5    0.31    0.36
  18   5  -5    0.58    0.38
  18  -5  -7   -0.06    0.34
  18   5  -7   -0.15    0.32
  18  -5  -9    0.90    0.42
  18   5  -9    0.69    0.39
  18  -5 -11    1.65    0.50
  18   5 -11    2.54    0.58
  18  -5 -13    1.48    0.50
  18   5 -13    1.12    0.46
  18  -5 -15    0.50    0.44
  18   5 -15    0.95    0.47
  18   5 -17    4.76    0.78
  18   5 -19    0.54    0.48
  18   6   6    0.31    0.50
  18   6   4    0.52    0.50
  18   6   2    0.62    0.46
  18  -6   0    2.45    0.59
  18   6   0    1.64    0.62
  18  -6  -2    2.95    0.64
  18   6  -2    1.98    0.62
  18   6  -4    3.25    0.72
  19   0  19    0.28    0.46
  19   0  17    0.13    0.39
  19   0  15   -0.01    0.36
  19   0  13    0.02    0.34
  19   0  11   -0.04    0.33
  19   0   9    0.09    0.33
  19   0   7    0.57    0.34
  19   0   5    0.38    0.34
  19   0   3    1.29    0.43
  19   0   1   -0.11    0.28
  19   0  -1    0.37    0.27
  19   0  -1    0.10    0.26
  19   0  -3    0.27    0.26
  19   0  -3    0.22    0.29
  19   0  -5    1.26    0.42
  19   0  -5    1.58    0.39
  19   0  -7    0.15    0.31
  19   0  -7    0.08    0.26
  19   0  -9    0.19    0.32
  19   0  -9    0.22    0.30
  19   0 -11   -0.03    0.27
  19   0 -13    0.29    0.33
  19   0 -15    0.71    0.36
  19   0 -17   -0.14    0.27
  19   0 -19    0.00    0.31
  19   0 -21   -0.06    0.33
  19   0 -23   -0.07    0.34
  19   0 -25    0.42    0.41
  19  -1  20   -0.15    0.41
  19   1  20    0.40    0.49
  19  -1  18    0.36    0.43
  19   1  18    0.34    0.46
  19  -1  16    0.29    0.41
  19   1  16    0.10    0.39
  19  -1  14    0.51    0.40
  19   1  14    0.72    0.46
  19  -1  12    0.56    0.40
  19   1  12    0.24    0.39
  19  -1  10    1.97    0.52
  19   1  10    2.70    0.58
  19  -1   8    0.70    0.37
  19   1   8    0.61    0.38
  19  -1   6    3.10    0.56
  19   1   6    1.99    0.50
  19  -1   4   -0.04    0.30
  19   1   4    0.57    0.35
  19  -1   2    0.01    0.26
  19   1   2    1.16    0.41
  19  -1   0    0.04    0.26
  19  -1   0    0.87    0.36
  19   1   0   -0.02    0.27
  19  -1  -2    1.87    0.46
  19  -1  -2    1.61    0.40
  19   1  -2    2.12    0.48
  19  -1  -4    0.14    0.30
  19  -1  -4   -0.40    0.20
  19   1  -4    0.01    0.26
  19   1  -4   -0.04    0.24
  19  -1  -6    0.93    0.38
  19  -1  -6    1.21    0.37
  19   1  -6    0.87    0.38
  19   1  -6    1.18    0.36
  19  -1  -8    0.45    0.33
  19  -1  -8    0.44    0.30
  19   1  -8   -0.20    0.25
  19   1  -8    0.29    0.33
  19  -1 -10   -0.15    0.25
  19  -1 -10    0.09    0.30
  19   1 -10    0.14    0.28
  19   1 -10    0.24    0.29
  19  -1 -12    0.37    0.31
  19   1 -12   -0.05    0.29
  19  -1 -14    0.38    0.34
  19   1 -14    0.09    0.29
  19  -1 -16    0.40    0.34
  19   1 -16    0.73    0.36
  19  -1 -18    0.62    0.38
  19   1 -18    0.57    0.37
  19  -1 -20    0.78    0.43
  19   1 -20    0.60    0.40
  19  -1 -22    1.20    0.49
  19   1 -22    1.20    0.48
  19  -1 -24    2.02    0.59
  19   1 -24    0.90    0.45
  19  -2  19    0.99    0.54
  19   2  19    0.00    0.49
  19  -2  17    0.34    0.44
  19   2  17   -0.23    0.42
  19  -2  15    0.13    0.40
  19   2  15   -0.11    0.36
  19  -2  13    0.17    0.37
  19   2  13    0.51    0.43
  19  -2  11   -0.12    0.32
  19   2  11   -0.07    0.34
  19  -2   9    1.20    0.44
  19   2   9    1.62    0.52
  19  -2   7    0.38    0.34
  19   2   7    0.05    0.32
  19  -2   5    0.31    0.33
  19   2   5    0.43    0.37
  19  -2   3    0.05    0.27
  19  -2   3    0.34    0.31
  19   2   3    0.26    0.33
  19  -2   1    0.50    0.29
  19  -2   1    0.59    0.32
  19   2   1    0.75    0.37
  19  -2  -1   -0.09    0.27
  19  -2  -1    0.26    0.29
  19   2  -1    0.09    0.32
  19  -2  -3    0.01    0.27
  19  -2  -3    0.54    0.31
  19   2  -3    0.24    0.31
  19  -2  -5    0.68    0.33
  19  -2  -5    0.91    0.38
  19   2  -5    0.62    0.39
  19  -2  -7    0.29    0.28
  19  -2  -7    0.96    0.36
  19   2  -7    0.80    0.41
  19   2  -7    0.64    0.34
  19  -2  -9    0.09    0.30
  19  -2  -9   -0.08    0.26
  19   2  -9    0.05    0.30
  19   2  -9    0.15    0.35
  19  -2 -11    0.43    0.34
  19  -2 -11    0.21    0.27
  19   2 -11    0.29    0.32
  19  -2 -13   -0.30    0.24
  19   2 -13    0.40    0.32
  19  -2 -15   -0.16    0.31
  19   2 -15    0.27    0.35
  19  -2 -17    0.41    0.37
  19   2 -17    0.02    0.31
  19  -2 -19   -0.11    0.33
  19   2 -19   -0.14    0.34
  19  -2 -21    0.13    0.37
  19   2 -21   -0.28    0.33
  19  -2 -23    0.47    0.45
  19   2 -23   -0.19    0.39
  19   3  16    1.67    0.61
  19   3  14    0.67    0.46
  19   3  12    0.20    0.42
  19   3  10    0.77    0.46
  19   3   8    0.05    0.37
  19  -3   6    0.72    0.38
  19   3   6    0.68    0.39
  19  -3   4    0.16    0.32
  19   3   4    0.25    0.34
  19  -3   2    0.26    0.29
  19   3   2    0.32    0.35
  19  -3   0    0.40    0.31
  19   3   0    0.99    0.43
  19  -3  -2   -0.17    0.28
  19   3  -2   -0.16    0.29
  19  -3  -4   -0.04    0.29
  19   3  -4    0.42    0.35
  19  -3  -6   -0.20    0.30
  19   3  -6    0.60    0.35
  19  -3  -8    0.12    0.30
  19   3  -8   -0.09    0.28
  19  -3 -10    0.23    0.32
  19   3 -10    0.24    0.32
  19   3 -10    0.02    0.28
  19  -3 -12    0.19    0.34
  19   3 -12   -0.03    0.29
  19  -3 -14    1.76    0.50
  19   3 -14    1.15    0.45
  19  -3 -16    1.36    0.48
  19   3 -16    2.49    0.56
  19  -3 -18    1.58    0.51
  19   3 -18    0.84    0.44
  19  -3 -20    2.18    0.57
  19   3 -20    1.24    0.51
  19  -3 -22    2.25    0.61
  19   3 -22    1.05    0.50
  19   4  15    0.29    0.45
  19   4  13    0.66    0.50
  19   4  11   -0.48    0.35
  19   4   9    0.77    0.44
  19  -4   7    0.59    0.40
  19   4   7    0.17    0.40
  19  -4   5    0.08    0.33
  19   4   5    0.20    0.39
  19  -4   3    0.46    0.35
  19   4   3    0.38    0.39
  19  -4   1    0.26    0.34
  19   4   1   -0.02    0.35
  19  -4  -1    0.85    0.41
  19   4  -1    0.84    0.41
  19  -4  -3    1.42    0.44
  19   4  -3    0.79    0.41
  19  -4  -5    0.57    0.36
  19   4  -5    0.52    0.37
  19  -4  -7    0.41    0.35
  19   4  -7    0.67    0.40
  19  -4  -9    0.03    0.31
  19   4  -9    0.77    0.42
  19  -4 -11    0.41    0.36
  19   4 -11    0.45    0.40
  19  -4 -13    0.48    0.37
  19   4 -13    0.74    0.41
  19  -4 -15    0.27    0.36
  19   4 -15   -0.10    0.36
  19  -4 -17    0.57    0.44
  19   4 -17    0.82    0.47
  19  -4 -19    0.74    0.45
  19   4 -19    1.25    0.51
  19   4 -21   -0.23    0.38
  19   5  10    0.06    0.43
  19  -5   8    0.52    0.44
  19   5   8    0.26    0.43
  19  -5   6    1.12    0.47
  19   5   6    1.22    0.51
  19  -5   4    0.01    0.33
  19   5   4   -0.06    0.38
  19  -5   2    0.05    0.38
  19   5   2    0.36    0.41
  19  -5   0    0.24    0.35
  19   5   0   -0.10    0.35
  19  -5  -2    0.51    0.38
  19   5  -2   -0.20    0.34
  19  -5  -4   -0.29    0.29
  19   5  -4    0.30    0.38
  19  -5  -6    0.23    0.38
  19   5  -6    0.50    0.40
  19  -5  -8    0.01    0.34
  19   5  -8    0.07    0.36
  19  -5 -10    0.54    0.38
  19   5 -10    1.10    0.46
  19  -5 -12    0.94    0.45
  19   5 -12    0.73    0.46
  19   5 -14    0.21    0.40
  19   5 -16    0.24    0.41
  19   5 -18    0.01    0.42
  19   6   3   -0.05    0.41
  19   6   1   -0.03    0.45
  19   6  -1   -0.18    0.39
  19   6  -3   -0.01    0.45
  19   6  -5    0.57    0.47
  20   0  18    0.32    0.47
  20   0  16    0.51    0.45
  20   0  14    0.62    0.45
  20   0  12    0.26    0.39
  20   0  10    1.09    0.45
  20   0   8   -0.29    0.29
  20   0   6    0.11    0.31
  20   0   4    0.23    0.35
  20   0   2    2.28    0.52
  20   0   0   12.57    1.03
  20   0  -2    5.04    0.71
  20   0  -4   13.18    1.04
  20   0  -4   12.73    0.96
  20   0  -6    8.43    0.90
  20   0  -6    6.73    0.76
  20   0  -8    8.28    0.94
  20   0  -8   10.44    0.84
  20   0 -10    8.89    0.96
  20   0 -10   10.49    0.98
  20   0 -12    4.69    0.66
  20   0 -14    9.49    0.98
  20   0 -16    2.16    0.54
  20   0 -18    1.37    0.48
  20   0 -20    1.70    0.51
  20   0 -22    1.65    0.54
  20   0 -24   -0.29    0.36
  20  -1  17    0.20    0.42
  20   1  17    1.15    0.55
  20  -1  15    0.69    0.43
  20   1  15    0.93    0.48
  20  -1  13    0.90    0.47
  20   1  13    0.68    0.48
  20  -1  11    1.94    0.54
  20   1  11    2.49    0.58
  20  -1   9    2.44    0.56
  20   1   9    2.67    0.58
  20  -1   7    4.66    0.70
  20   1   7    5.18    0.76
  20  -1   5    2.99    0.56
  20   1   5    2.13    0.54
  20  -1   3    0.65    0.38
  20   1   3    0.73    0.36
  20  -1   1    1.04    0.40
  20   1   1    1.44    0.47
  20  -1  -1    1.29    0.38
  20  -1  -1    1.78    0.47
  20   1  -1    1.15    0.42
  20  -1  -3    0.85    0.35
  20  -1  -3    1.09    0.39
  20   1  -3    0.80    0.39
  20  -1  -5    0.26    0.29
  20  -1  -5   -0.15    0.26
  20   1  -5    0.19    0.28
  20   1  -5    0.31    0.34
  20  -1  -7    0.54    0.35
  20  -1  -7    0.55    0.33
  20   1  -7    0.63    0.37
  20   1  -7    0.55    0.33
  20  -1  -9    2.01    0.49
  20  -1  -9    1.88    0.45
  20   1  -9    2.10    0.46
  20   1  -9    1.91    0.51
  20  -1 -11    2.44    0.51
  20  -1 -11    1.89    0.49
  20   1 -11    2.36    0.56
  20   1 -11    2.13    0.48
  20  -1 -13    2.98    0.57
  20   1 -13    3.28    0.58
  20  -1 -15    4.53    0.70
  20   1 -15    3.99    0.65
  20  -1 -17    2.90    0.61
  20   1 -17    2.34    0.54
  20  -1 -19    6.42    0.86
  20   1 -19    6.98    0.88
  20  -1 -21    2.94    0.64
  20   1 -21    2.96    0.62
  20  -1 -23    3.03    0.66
  20   1 -23    3.99    0.72
  20  -2  16    0.77    0.50
  20   2  16    0.09    0.43
  20  -2  14    0.96    0.49
  20   2  14    0.72    0.50
  20  -2  12    0.43    0.39
  20   2  12    0.06    0.39
  20  -2  10    0.61    0.39
  20   2  10    0.66    0.42
  20  -2   8    0.38    0.36
  20   2   8    0.29    0.36
  20  -2   6    1.08    0.42
  20   2   6    0.85    0.42
  20  -2   4    1.14    0.41
  20   2   4    1.10    0.44
  20  -2   2    2.08    0.48
  20  -2   2    2.11    0.45
  20   2   2    1.92    0.53
  20  -2   0    3.06    0.55
  20  -2   0    2.38    0.48
  20   2   0    2.22    0.54
  20  -2  -2    3.17    0.55
  20  -2  -2    3.81    0.60
  20   2  -2    2.75    0.56
  20  -2  -4    4.08    0.61
  20  -2  -4    3.88    0.60
  20   2  -4    5.99    0.78
  20  -2  -6    8.70    0.89
  20  -2  -6    7.43    0.81
  20   2  -6    7.19    0.88
  20  -2  -8    9.65    0.97
  20  -2  -8    9.17    0.91
  20   2  -8    8.94    0.99
  20   2  -8    9.14    0.90
  20  -2 -10    8.51    0.89
  20  -2 -10   10.19    0.99
  20   2 -10    8.44    0.88
  20   2 -10    7.78    0.95
  20  -2 -12    7.06    0.89
  20  -2 -12    9.62    0.94
  20   2 -12    8.78    0.90
  20  -2 -14    2.31    0.54
  20   2 -14    4.04    0.64
  20  -2 -16    5.88    0.82
  20   2 -16    4.72    0.72
  20  -2 -18    2.83    0.60
  20   2 -18    2.03    0.53
  20  -2 -20    0.68    0.43
  20   2 -20    1.02    0.48
  20  -2 -22    0.24    0.41
  20   2 -22    0.42    0.42
  20   3  15    1.84    0.62
  20   3  13    1.44    0.56
  20   3  11    3.90    0.75
  20   3   9    1.31    0.50
  20   3   7    0.93    0.45
  20   3   5    1.93    0.53
  20  -3   3    1.89    0.46
  20   3   3    2.28    0.54
  20  -3   1    2.18    0.50
  20   3   1    3.02    0.61
  20  -3  -1    1.90    0.47
  20   3  -1    1.07    0.46
  20  -3  -3    2.47    0.54
  20   3  -3    2.43    0.57
  20  -3  -5    0.13    0.31
  20   3  -5   -0.13    0.29
  20  -3  -7    0.51    0.36
  20   3  -7    0.75    0.41
  20  -3  -9    0.73    0.37
  20   3  -9   -0.09    0.32
  20  -3 -11    1.66    0.49
  20   3 -11    1.31    0.42
  20   3 -11    1.50    0.51
  20  -3 -13    1.62    0.50
  20   3 -13    0.87    0.41
  20  -3 -15    6.94    0.91
  20   3 -15    7.00    0.85
  20  -3 -17    2.93    0.65
  20   3 -17    3.96    0.68
  20  -3 -19    7.20    0.96
  20   3 -19    5.51    0.83
  20   3 -21    2.63    0.66
  20   4  12    0.10    0.46
  20   4  10    0.73    0.49
  20   4   8   -0.36    0.38
  20  -4   6    0.03    0.34
  20   4   6    0.46    0.45
  20  -4   4    0.20    0.36
  20   4   4   -0.25    0.31
  20  -4   2    0.93    0.43
  20   4   2    0.79    0.44
  20  -4   0    2.39    0.55
  20   4   0    3.22    0.64
  20  -4  -2    4.11    0.67
  20   4  -2    4.30    0.73
  20  -4  -4    4.18    0.68
  20   4  -4    3.40    0.69
  20  -4  -6    2.26    0.57
  20   4  -6    2.02    0.55
  20  -4  -8    3.25    0.62
  20   4  -8    3.33    0.65
  20  -4 -10    6.75    0.87
  20   4 -10    5.54    0.82
  20  -4 -12    2.43    0.61
  20   4 -12    2.73    0.63
  20  -4 -14    1.49    0.52
  20   4 -14    0.91    0.44
  20   4 -14    0.16    0.37
  20  -4 -16    2.60    0.64
  20   4 -16    2.84    0.64
  20   4 -18    0.65    0.48
  20  -5   7    1.00    0.48
  20   5   7    0.99    0.52
  20  -5   5    1.10    0.49
  20   5   5    1.63    0.58
  20  -5   3    1.19    0.48
  20   5   3    0.69    0.46
  20  -5   1    0.29    0.38
  20   5   1    0.36    0.42
  20  -5  -1    1.02    0.44
  20   5  -1    0.58    0.45
  20  -5  -3    0.77    0.43
  20   5  -3    1.20    0.51
  20  -5  -5    0.50    0.41
  20   5  -5    0.53    0.40
  20  -5  -7    0.00    0.35
  20   5  -7    0.46    0.42
  20  -5  -9    1.27    0.48
  20   5  -9    0.68    0.44
  20   5 -11    0.41    0.42
  20   5 -13    1.22    0.49
  20   5 -15    2.73    0.66
  21   0  17    1.13    0.54
  21   0  15    0.40    0.43
  21   0  13    1.82    0.61
  21   0  11    0.15    0.36
  21   0   9    0.19    0.35
  21   0   7   -0.03    0.33
  21   0   5    0.09    0.32
  21   0   3    1.62    0.47
  21   0   1    0.28    0.35
  21   0  -1    0.77    0.41
  21   0  -3    1.21    0.43
  21   0  -5    0.35    0.31
  21   0  -5   -0.01    0.31
  21   0  -7    1.23    0.43
  21   0  -7    0.92    0.37
  21   0  -9    1.04    0.44
  21   0  -9    0.88    0.37
  21   0 -11    0.66    0.36
  21   0 -11    0.34    0.37
  21   0 -13   -0.05    0.32
  21   0 -15    3.05    0.60
  21   0 -17   -0.22    0.31
  21   0 -19   -0.09    0.35
  21   0 -21   -0.31    0.35
  21  -1  16    0.33    0.45
  21   1  16    0.53    0.45
  21  -1  14    1.06    0.51
  21   1  14    1.81    0.60
  21  -1  12   -0.08    0.36
  21   1  12    0.58    0.46
  21  -1  10    0.77    0.45
  21   1  10    0.94    0.47
  21  -1   8    1.55    0.50
  21   1   8    2.34    0.57
  21  -1   6    1.27    0.46
  21   1   6    1.41    0.48
  21  -1   4    1.44    0.44
  21   1   4    0.63    0.40
  21  -1   2    1.23    0.44
  21   1   2    0.95    0.44
  21  -1   0    0.70    0.39
  21   1   0    0.99    0.44
  21  -1  -2    0.08    0.32
  21  -1  -2    0.26    0.31
  21   1  -2    0.39    0.37
  21  -1  -4    0.79    0.36
  21  -1  -4    0.73    0.39
  21   1  -4   -0.03    0.33
  21  -1  -6    0.40    0.31
  21  -1  -6    0.22    0.33
  21   1  -6    0.32    0.37
  21  -1  -8    0.33    0.32
  21  -1  -8    0.30    0.33
  21   1  -8    0.44    0.36
  21   1  -8    0.49    0.34
  21  -1 -10    0.04    0.31
  21  -1 -10    0.40    0.35
  21   1 -10    0.73    0.37
  21   1 -10    0.23    0.35
  21  -1 -12    1.19    0.42
  21  -1 -12    1.07    0.44
  21   1 -12    1.03    0.42
  21   1 -12    0.95    0.47
  21  -1 -14   -0.05    0.33
  21   1 -14    0.82    0.40
  21  -1 -16    0.80    0.41
  21   1 -16   -0.04    0.32
  21  -1 -18    0.61    0.40
  21   1 -18   -0.38    0.32
  21  -1 -20    0.29    0.39
  21   1 -20   -0.10    0.35
  21  -1 -22    0.05    0.37
  21   1 -22    0.51    0.44
  21  -2  15   -0.50    0.36
  21   2  15    0.16    0.47
  21  -2  13    0.55    0.44
  21   2  13    0.18    0.42
  21  -2  11   -0.09    0.38
  21   2  11    0.56    0.46
  21  -2   9    0.97    0.45
  21   2   9    0.54    0.41
  21  -2   7    3.33    0.62
  21   2   7    2.32    0.57
  21  -2   5    0.13    0.36
  21   2   5    0.17    0.39
  21  -2   3    0.24    0.34
  21   2   3    1.07    0.47
  21  -2   1    1.46    0.45
  21   2   1    0.89    0.47
  21  -2  -1    0.49    0.33
  21  -2  -1    0.56    0.37
  21   2  -1    0.71    0.43
  21  -2  -3    0.03    0.31
  21  -2  -3    0.94    0.42
  21   2  -3   -0.12    0.34
  21  -2  -5    0.98    0.40
  21  -2  -5    0.31    0.35
  21   2  -5    0.19    0.36
  21  -2  -7    3.33    0.59
  21  -2  -7    3.53    0.61
  21   2  -7    3.07    0.63
  21  -2  -9    0.14    0.32
  21  -2  -9    0.22    0.33
  21   2  -9    0.39    0.40
  21  -2 -11    0.25    0.32
  21  -2 -11    0.19    0.34
  21   2 -11    0.62    0.43
  21   2 -11    0.68    0.39
  21  -2 -13    1.33    0.47
  21  -2 -13    2.07    0.51
  21   2 -13    2.24    0.51
  21   2 -13    2.01    0.55
  21  -2 -15    0.77    0.43
  21   2 -15    0.76    0.41
  21  -2 -17    0.45    0.41
  21   2 -17    0.59    0.40
  21  -2 -19    0.21    0.39
  21   2 -19    0.42    0.41
  21   2 -21    0.42    0.43
  21   3  12    0.91    0.50
  21   3  10    0.83    0.52
  21   3   8    0.58    0.42
  21   3   6    0.01    0.40
  21   3   4    0.84    0.48
  21  -3   2   -0.09    0.30
  21   3   2    0.62    0.44
  21  -3   0    0.76    0.40
  21   3   0    1.25    0.46
  21  -3  -2    0.41    0.35
  21   3  -2    0.40    0.41
  21  -3  -4    0.77    0.38
  21   3  -4    0.23    0.40
  21  -3  -6    0.16    0.33
  21   3  -6    0.07    0.37
  21  -3  -8    0.11    0.33
  21   3  -8    0.35    0.36
  21  -3 -10    0.00    0.35
  21   3 -10    0.49    0.45
  21  -3 -12    1.00    0.44
  21   3 -12    1.08    0.42
  21   3 -12    0.92    0.46
  21  -3 -14    0.11    0.35
  21   3 -14    0.45    0.36
  21   3 -14    0.37    0.40
  21  -3 -16    1.05    0.47
  21   3 -16    0.06    0.35
  21  -3 -18    0.80    0.46
  21   3 -18    1.39    0.54
  21   3 -20    0.41    0.45
  21   4   9   -0.16    0.41
  21   4   7    0.26    0.44
  21   4   5    0.12    0.40
  21  -4   3    1.00    0.44
  21   4   3    0.19    0.43
  21  -4   1    0.06    0.34
  21   4   1    0.46    0.40
  21  -4  -1    0.38    0.38
  21   4  -1    0.51    0.45
  21  -4  -3   -0.09    0.31
  21   4  -3    0.22    0.41
  21  -4  -5    1.15    0.47
  21   4  -5    1.67    0.56
  21  -4  -7    1.18    0.46
  21   4  -7    1.44    0.53
  21  -4  -9   -0.01    0.35
  21   4  -9    0.18    0.40
  21  -4 -11    0.32    0.38
  21   4 -11   -0.06    0.37
  21  -4 -13    0.17    0.38
  21   4 -13    0.08    0.38
  21   4 -15    0.51    0.47
  21   4 -17   -0.21    0.40
  21   5   4    0.00    0.44
  21   5   2    0.43    0.46
  21   5   0   -0.03    0.39
  21   5  -2    0.27    0.42
  21   5  -4    0.10    0.41
  21   5  -6   -0.06    0.39
  21   5  -8    1.08    0.50
  21   5 -10    0.14    0.42
  21   5 -12   -0.04    0.43
  22   0  14   -0.08    0.42
  22   0  12    0.95    0.51
  22   0  10    0.07    0.38
  22   0   8    0.17    0.39
  22   0   6    0.47    0.42
  22   0   4    0.30    0.39
  22   0   2    0.72    0.42
  22   0   0    0.17    0.38
  22   0  -2    2.89    0.62
  22   0  -4    4.51    0.71
  22   0  -6    4.60    0.66
  22   0  -6    4.19    0.71
  22   0  -8   12.06    1.00
  22   0  -8   12.48    1.06
  22   0 -10    2.01    0.49
  22   0 -10    1.71    0.51
  22   0 -12    4.10    0.68
  22   0 -12    5.80    0.80
  22   0 -14    0.38    0.37
  22   0 -14    1.36    0.49
  22   0 -16    2.60    0.58
  22   0 -18    0.70    0.42
  22   0 -20    2.05    0.57
  22  -1  13    0.27    0.43
  22   1  13    0.43    0.50
  22  -1  11    0.01    0.41
  22   1  11    0.22    0.44
  22  -1   9    0.28    0.38
  22   1   9    0.99    0.48
  22  -1   7    1.53    0.51
  22   1   7    0.83    0.46
  22  -1   5    4.91    0.75
  22   1   5    3.42    0.69
  22  -1   3    2.06    0.53
  22   1   3    1.99    0.56
  22  -1   1    0.59    0.40
  22   1   1    1.43    0.51
  22  -1  -1    0.10    0.34
  22   1  -1    0.11    0.35
  22  -1  -3   -0.15    0.31
  22  -1  -3   -0.20    0.29
  22   1  -3   -0.08    0.34
  22  -1  -5    0.15    0.34
  22  -1  -5   -0.24    0.28
  22   1  -5    0.26    0.37
  22  -1  -7    0.33    0.36
  22  -1  -7    0.51    0.37
  22   1  -7    0.31    0.41
  22  -1  -9    0.28    0.34
  22  -1  -9    0.53    0.39
  22   1  -9    0.87    0.39
  22   1  -9    0.51    0.41
  22  -1 -11    0.85    0.41
  22  -1 -11    0.47    0.33
  22   1 -11    1.48    0.51
  22   1 -11    1.36    0.46
  22  -1 -13    0.37    0.37
  22  -1 -13    0.25    0.38
  22   1 -13    1.05    0.44
  22   1 -13    0.40    0.42
  22  -1 -15    2.22    0.55
  22  -1 -15    2.43    0.58
  22   1 -15    2.70    0.61
  22  -1 -17    1.26    0.51
  22   1 -17    1.09    0.48
  22  -1 -19    2.29    0.59
  22   1 -19    2.42    0.61
  22  -2  12    0.13    0.41
  22   2  12    0.69    0.47
  22  -2  10    0.40    0.43
  22   2  10    0.12    0.44
  22  -2   8    0.19    0.39
  22   2   8   -0.47    0.37
  22  -2   6    0.10    0.36
  22   2   6    0.04    0.40
  22  -2   4    0.35    0.39
  22   2   4   -0.02    0.34
  22  -2   2    0.57    0.39
  22   2   2    0.77    0.46
  22  -2   0    0.67    0.40
  22   2   0    1.24    0.51
  22  -2  -2    2.75    0.54
  22  -2  -2    2.02    0.52
  22   2  -2    1.62    0.52
  22  -2  -4    2.57    0.57
  22  -2  -4    3.19    0.58
  22   2  -4    3.37    0.69
  22  -2  -6    2.74    0.56
  22  -2  -6    3.02    0.57
  22   2  -6    2.55    0.63
  22  -2  -8    6.94    0.81
  22  -2  -8    5.92    0.77
  22   2  -8    5.78    0.84
  22  -2 -10    5.00    0.73
  22  -2 -10    3.60    0.65
  22   2 -10    3.42    0.70
  22  -2 -12    5.66    0.81
  22  -2 -12    4.99    0.74
  22   2 -12    6.00    0.78
  22   2 -12    4.38    0.77
  22  -2 -14    3.01    0.66
  22  -2 -14    2.10    0.55
  22   2 -14    3.79    0.66
  22   2 -14    4.53    0.78
  22  -2 -16    5.89    0.80
  22  -2 -16    4.36    0.76
  22   2 -16    5.30    0.78
  22  -2 -18    0.74    0.46
  22   2 -18    0.10    0.43
  22   2 -20   -0.03    0.38
  22   3   9    0.85    0.51
  22   3   7    2.32    0.65
  22   3   5   -0.16    0.36
  22   3   3    1.32    0.53
  22  -3   1    1.12    0.46
  22   3   1    1.34    0.51
  22  -3  -1    1.30    0.46
  22   3  -1    1.25    0.54
  22  -3  -3    0.12    0.36
  22   3  -3   -0.15    0.34
  22  -3  -5    0.56    0.41
  22   3  -5    0.45    0.41
  22  -3  -7   -0.10    0.32
  22   3  -7    0.20    0.39
  22  -3  -9    0.34    0.38
  22   3  -9    0.12    0.38
  22  -3 -11    0.82    0.44
  22   3 -11    1.77    0.57
  22  -3 -13    0.39    0.39
  22   3 -13    1.09    0.51
  22  -3 -15    1.87    0.57
  22   3 -15    1.33    0.49
  22   3 -15    1.79    0.58
  22   3 -17    0.96    0.46
  22   4   6    0.13    0.46
  22   4   4   -0.12    0.41
  22  -4   2    0.32    0.42
  22   4   2    0.74    0.47
  22  -4   0    0.64    0.43
  22   4   0    0.20    0.43
  22  -4  -2    0.79    0.44
  22   4  -2    1.17    0.51
  22  -4  -4    0.70    0.45
  22   4  -4    1.29    0.54
  22  -4  -6    4.35    0.72
  22   4  -6    3.30    0.71
  22  -4  -8    3.18    0.65
  22   4  -8    3.39    0.68
  22   4 -10    0.19    0.41
  22   4 -12    1.78    0.60
  22   4 -14    1.04    0.54
  22   4 -16    0.41    0.48
  23   0  11   -0.25    0.39
  23   0   9    0.28    0.40
  23   0   7    0.65    0.44
  23   0   5    0.48    0.39
  23   0   3    0.08    0.39
  23   0   1    2.44    0.57
  23   0  -1    0.42    0.42
  23   0  -3    0.24    0.41
  23   0  -5    2.13    0.57
  23   0  -7    0.70    0.36
  23   0  -7    0.19    0.37
  23   0  -9    0.32    0.38
  23   0  -9    0.13    0.36
  23   0 -11    0.75    0.41
  23   0 -11    0.83    0.45
  23   0 -13    2.21    0.57
  23   0 -13    2.46    0.59
  23   0 -15    0.90    0.48
  23   0 -15    0.26    0.40
  23   0 -17   -0.21    0.34
  23   0 -19   -0.27    0.39
  23  -1  10    1.13    0.53
  23   1  10    0.98    0.52
  23  -1   8    2.50    0.62
  23   1   8    1.40    0.54
  23  -1   6    0.43    0.43
  23   1   6    0.37    0.47
  23  -1   4    2.43    0.59
  23   1   4    1.55    0.54
  23  -1   2    1.16    0.50
  23   1   2   -0.02    0.39
  23  -1   0    1.08    0.44
  23   1   0    1.19    0.50
  23  -1  -2    0.41    0.36
  23   1  -2    0.71    0.42
  23  -1  -4    0.27    0.38
  23   1  -4    0.38    0.41
  23  -1  -6    0.45    0.36
  23  -1  -6    0.42    0.40
  23   1  -6   -0.02    0.37
  23  -1  -8    0.16    0.36
  23  -1  -8    0.58    0.36
  23   1  -8   -0.07    0.38
  23  -1 -10    0.09    0.35
  23  -1 -10   -0.08    0.34
  23   1 -10    0.65    0.44
  23   1 -10    0.29    0.37
  23  -1 -12    0.24    0.35
  23  -1 -12   -0.09    0.34
  23   1 -12   -0.22    0.37
  23   1 -12    0.13    0.35
  23  -1 -14    0.29    0.36
  23  -1 -14    0.20    0.40
  23   1 -14   -0.18    0.31
  23   1 -14    0.50    0.45
  23  -1 -16    0.05    0.37
  23  -1 -16    0.19    0.40
  23   1 -16   -0.08    0.33
  23  -1 -18    0.37    0.42
  23   1 -18   -0.26    0.35
  23  -2   9   -0.02    0.42
  23   2   9   -0.34    0.35
  23  -2   7   -0.04    0.38
  23   2   7    0.23    0.43
  23  -2   5    0.12    0.38
  23   2   5    1.01    0.50
  23  -2   3    0.12    0.37
  23   2   3    0.31    0.41
  23  -2   1    0.53    0.40
  23   2   1    0.94    0.50
  23  -2  -1    0.76    0.43
  23   2  -1    1.53    0.57
  23  -2  -3    0.83    0.43
  23  -2  -3    1.14    0.43
  23   2  -3    1.21    0.51
  23  -2  -5    2.11    0.52
  23  -2  -5    0.79    0.44
  23   2  -5    1.73    0.54
  23  -2  -7    1.67    0.51
  23  -2  -7    1.56    0.50
  23   2  -7    1.32    0.51
  23  -2  -9    1.68    0.51
  23  -2  -9    1.65    0.49
  23   2  -9    2.09    0.60
  23  -2 -11    2.25    0.57
  23  -2 -11    1.62    0.51
  23   2 -11    1.47    0.57
  23  -2 -13    0.46    0.40
  23  -2 -13    1.36    0.49
  23   2 -13    0.74    0.45
  23   2 -13    0.70    0.48
  23  -2 -15   -0.21    0.36
  23  -2 -15    0.25    0.42
  23   2 -15    0.25    0.42
  23   2 -15   -0.31    0.39
  23  -2 -17    0.17    0.40
  23   2 -17    0.14    0.38
  23   3   6    0.49    0.46
  23   3   4    1.01    0.50
  23   3   2   -0.22    0.42
  23   3   0    0.06    0.44
  23  -3  -2    0.49    0.40
  23   3  -2    0.42    0.47
  23  -3  -4    0.07    0.38
  23   3  -4    0.11    0.42
  23  -3  -6   -0.33    0.33
  23   3  -6   -0.05    0.42
  23  -3  -8   -0.42    0.31
  23   3  -8   -0.30    0.40
  23  -3 -10    0.28    0.40
  23   3 -10    0.02    0.42
  23  -3 -12   -0.48    0.32
  23   3 -12    0.41    0.46
  23   3 -14   -0.30    0.39
  23   3 -16    1.34    0.55
  23   3 -16    0.29    0.45
  23  -4   1    0.85    0.50
  23   4   1    0.80    0.54
  23  -4  -1    0.64    0.44
  23   4  -1    0.33    0.47
  23   4  -3    0.88    0.53
  23   4  -5    0.39    0.44
  23   4  -7    1.06    0.55
  23   4  -9    0.72    0.51
  23   4 -11    0.25    0.42
  24   0   8    0.36    0.47
  24   0   6   -0.28    0.39
  24   0   4    0.27    0.45
  24   0   2    0.11    0.38
  24   0   0    1.12    0.50
  24   0  -2    1.20    0.47
  24   0  -4   -0.13    0.35
  24   0  -6    3.82    0.71
  24   0  -8    0.40    0.40
  24   0 -10    1.15    0.52
  24   0 -10    1.01    0.46
  24   0 -12    0.66    0.42
  24   0 -12   -0.17    0.36
  24   0 -14    0.09    0.41
  24   0 -14   -0.18    0.35
  24   0 -16    2.10    0.57
  24   0 -16    0.79    0.50
  24  -1   7    0.38    0.40
  24   1   7    0.00    0.43
  24  -1   5    0.56    0.45
  24   1   5    0.82    0.52
  24  -1   3   -0.20    0.35
  24   1   3    0.03    0.43
  24  -1   1    0.40    0.42
  24   1   1    0.29    0.44
  24  -1  -1    0.73    0.45
  24   1  -1    1.12    0.51
  24  -1  -3    0.66    0.41
  24   1  -3    0.43    0.44
  24  -1  -5   -0.05    0.36
  24   1  -5   -0.37    0.33
  24  -1  -7    0.54    0.40
  24  -1  -7    0.26    0.40
  24   1  -7   -0.06    0.36
  24  -1  -9    0.24    0.36
  24  -1  -9    0.22    0.39
  24   1  -9    0.35    0.44
  24  -1 -11   -0.18    0.38
  24  -1 -11   -0.04    0.33
  24   1 -11    0.28    0.42
  24  -1 -13    0.79    0.45
  24  -1 -13    0.75    0.45
  24   1 -13    0.20    0.45
  24   1 -13    0.65    0.43
  24  -1 -15   -0.05    0.38
  24  -1 -15    0.00    0.38
  24   1 -15    0.94    0.50
  24   1 -15    1.32    0.52
  24  -1 -17    0.25    0.45
  24   1 -17    0.47    0.44
  24   1 -17    0.66    0.54
  24  -2   6    0.15    0.39
  24   2   6    0.05    0.43
  24  -2   4   -0.11    0.38
  24   2   4   -0.26    0.40
  24  -2   2   -0.09    0.37
  24   2   2    0.05    0.46
  24  -2   0    0.49    0.42
  24   2   0    1.29    0.58
  24  -2  -2    0.67    0.43
  24   2  -2    0.38    0.51
  24  -2  -4    0.05    0.33
  24  -2  -4   -0.03    0.40
  24   2  -4    0.18    0.46
  24  -2  -6    0.89    0.45
  24  -2  -6    0.49    0.44
  24   2  -6    0.72    0.51
  24  -2  -8    1.54    0.52
  24  -2  -8    1.36    0.47
  24   2  -8    0.94    0.52
  24  -2 -10    0.70    0.44
  24  -2 -10    1.54    0.49
  24   2 -10    2.14    0.60
  24  -2 -12    1.00    0.48
  24  -2 -12    1.54    0.49
  24   2 -12    0.88    0.50
  24  -2 -14    2.70    0.60
  24   2 -14    2.84    0.71
  24  -2 -16    0.51    0.43
  24   2 -16    0.59    0.49
  24   2 -16    0.68    0.49
  24   3   3    0.06    0.43
  24   3   1   -0.14    0.38
  24   3  -1    0.65    0.51
  24  -3  -3    0.75    0.45
  24   3  -3    0.01    0.44
  24  -3  -5    0.62    0.43
  24   3  -5   -0.24    0.42
  24  -3  -7    0.51    0.44
  24   3  -7   -0.39    0.41
  24   3  -9    0.14    0.41
  24   3 -11    0.43    0.43
  24   3 -13    0.43    0.46
  25   0   5   -0.31    0.39
  25   0   3    0.29    0.46
  25   0   1   -0.31    0.40
  25   0  -1    0.48    0.45
  25   0  -3    0.51    0.47
  25   0  -5    1.28    0.54
  25   0  -7    0.53    0.44
  25   0  -9   -0.07    0.41
  25   0 -11    1.24    0.54
  25   0 -11    2.42    0.57
  25   0 -13    1.34    0.51
  25   0 -13    0.02    0.42
  25   0 -15    0.32    0.46
  25  -1   4    0.75    0.49
  25   1   4    1.23    0.53
  25  -1   2    2.94    0.67
  25   1   2    1.69    0.59
  25  -1   0    0.80    0.49
  25   1   0    0.40    0.43
  25  -1  -2    0.13    0.43
  25   1  -2    0.64    0.47
  25  -1  -4    0.28    0.42
  25   1  -4   -0.41    0.40
  25  -1  -6    0.55    0.45
  25   1  -6    1.10    0.52
  25  -1  -8   -0.01    0.40
  25  -1  -8    0.97    0.43
  25   1  -8    0.66    0.50
  25  -1 -10   -0.16    0.34
  25  -1 -10    0.51    0.39
  25   1 -10    0.27    0.44
  25  -1 -12    0.56    0.47
  25  -1 -12    0.08    0.40
  25   1 -12   -0.44    0.40
  25  -1 -14    0.15    0.40
  25   1 -14    0.84    0.50
  25   1 -14    1.16    0.55
  25  -2   1    0.05    0.41
  25   2   1   -0.08    0.45
  25  -2  -1    0.77    0.47
  25   2  -1    1.19    0.57
  25  -2  -3    0.87    0.46
  25   2  -3    1.41    0.61
  25  -2  -5    1.30    0.53
  25   2  -5    1.29    0.57
  25  -2  -7    0.24    0.43
  25  -2  -7    1.07    0.50
  25   2  -7    1.22    0.57
  25  -2  -9    1.77    0.56
  25  -2  -9    2.81    0.63
  25   2  -9    2.05    0.67
  25  -2 -11    0.24    0.43
  25   2 -11   -0.19    0.44
  26   0  -2   -0.05    0.41
  26   0  -4    0.32    0.42
  26   0  -6    0.05    0.44
  26   0  -8   -0.13    0.38
  26   0 -10   -0.09    0.37
  26  -1  -5   -0.23    0.41
  26   1  -5    0.50    0.46
  26  -1  -7    0.23    0.45
  26   1  -7    0.05    0.43
   0   0   0    0.00    0.00
;
_shelx_hkl_checksum   80555
